# Supplementary material for: General purpose propofol target-controlled infusion using the Marsh model with adjusted weight input
Source: Research Square preprint supplement (doi:10.21203/rs.3.rs-3296215/v3), 2024-01-19
Supplement: Supplementary file 1 [file 2531109161b6b759c6142b6b.xlsx]

## Sheet: EleMARSH
EleMarsh Mode by Propofol Dreams
Weight (kg)	130	4
Age (yr)	45
Height (m)	170
Sex (M=1)	1
CeT (mcg/mL)	4
BMI	44.9827
Marsh ABW	Induction CpT
89	11.1
kg	mcg/mL
Adjustment Bolus	68
	mg
How to use this calculator:
1. Enter patient details into green cells
2. Outputs are in blue cells
3. Use Marsh Plasma targeting, enter Marsh ABW as the input weight
4. Induce patient using calculated induction CpT. As soon as bolus is given, drop CpT down to desired CeT
5. Your Marsh TCI pump will now mimic behaviour of Eleveld TCI for maintenance phase
6. If you need to increase Ce target, simply increase CpT on pump such that the adjustment bolus is given for every 1 mcg/mL rise in CeT desired. Then drop CpT to new CeT target

## Sheet: Eleveld TCI
Effect TCI
Time(sec)	Target	Sec	Inf(mg/hr)	Pump inf(mg/hr)	A1 change	A1	A2	A3	Time(min)	Concentration	Concentration Effect	Cumulative Infused Volume
0	4	1	106352	12000	0	0	0	0	0	0	0	0.333333
1	4	1	94351.6	12000	0	3.33333	0	0	0.0166667	0.451333	0	0.666667
2	4	1	82673.6	12000	-0.0447282	6.62194	0.0193035	0.00661166	0.0333333	0.89661	0.000940779	1
3	4	1	71152.2	12000	-0.0888354	9.86644	0.0576312	0.0197458	0.05	1.33592	0.00280775	1.33333
4	4	1	59785.2	12000	-0.13233	13.0674	0.114708	0.0393144	0.0666667	1.76933	0.00558654	1.66667
5	4	1	48570.4	12000	-0.175221	16.2256	0.190261	0.0652307	0.0833333	2.19694	0.00926297	2
6	4	1	37505.7	12000	-0.217516	19.3414	0.284023	0.0974092	0.1	2.61882	0.0138231	2.33333
7	4	1	26589.1	12000	-0.259225	22.4155	0.39573	0.135766	0.116667	3.03506	0.019253	2.66667
8	4	1	15818.4	12000	-0.300354	25.4485	0.525122	0.180217	0.133333	3.44572	0.0255393	3
9	4	1	5191.69	12000	-0.340912	28.4409	0.671941	0.23068	0.15	3.85089	0.0326685	3.33333
10	4	1	-5293.06	12000	-0.380907	31.3933	0.835935	0.287076	0.166667	4.25065	0.0406274	3.66667
11	4	1	-15637.8	12000	-0.420347	34.3063	1.01685	0.349323	0.183333	4.64507	0.0494029	4
12	4	3	-14413.6	12000	-1.37644	42.9299	1.60964	0.553385	0.2	5.8127	0.0589823	5
15	4	5	-17511.8	12000	-2.86623	56.7303	2.84419	0.978937	0.25	7.68128	0.0949623	6.66667
20	4	5	-26126.9	12000	-3.78377	69.6132	4.47183	1.5412	0.333333	9.42562	0.174029	8.33333
25	4	5	-34172.8	12000	-4.63775	81.6421	6.4639	2.23101	0.416667	11.0543	0.270451	10
30	4	5	-41689.1	12000	-5.43257	92.8762	8.79375	3.03987	0.5	12.5754	0.382843	11.6667
35	4	5	-48712.4	12000	-6.17236	103.371	11.4366	3.95985	0.583333	13.9964	0.509917	13.3333		Targeting	1	(0 = plasma	1 = effect site)
40	4	5	-55276.7	12000	-6.86091	113.176	14.3694	4.98356	0.666667	15.3241	0.650475	15
45	4	5	-61414	12000	-7.5018	122.341	17.5706	6.10414	0.75	16.565	0.803407	16.6667		CeT (mcg/mL)	4
50	4	5	-67153.7	12000	-8.09832	130.909	21.0203	7.3152	0.833333	17.7251	0.967677	18.3333
55	4	5	-72523.4	12000	-8.65356	138.923	24.6998	8.61079	0.916667	18.8101	1.14233	20		Time Step (sec)	10
60	4	5	-77548.6	12000	-9.17038	146.419	28.592	9.98536	1	19.8251	1.32646	21.6667
65	4	5	-82253.2	12000	-9.65144	153.434	32.6807	11.4338	1.08333	20.775	1.51926	23.3333
70	4	5	-86659.3	9600	-10.0992	160.002	36.951	12.9512	1.16667	21.6642	1.71995	24.6667			Subject
75	4	5	-88387.7	0	-10.516	162.819	41.3888	14.5332	1.25	22.0457	1.92781	24.6667		Weight	130
80	4	5	-80578.8	0	-10.6808	152.138	45.8848	16.1426	1.33333	20.5995	2.13749	24.6667		Age	45
85	4	5	-73953.5	0	-9.94136	142.197	50.0479	17.6455	1.41667	19.2534	2.3299	24.6667		Length	170
90	4	5	-67786.6	0	-9.25321	132.943	53.9011	19.0492	1.5	18.0005	2.50628	24.6667		Male	1
95	4	5	-62046.5	0	-8.6128	124.331	57.466	20.3606	1.58333	16.8344	2.66777	24.6667
100	4	5	-56703.5	0	-8.01682	116.314	60.7627	21.5861	1.66667	15.7489	2.81541	24.6667		Bolus Size	259.411	mg
105	4	5	-51730.1	0	-7.4622	108.852	63.8099	22.7317	1.75	14.7385	2.95021	24.6667		Bolus Duration	74	sec
110	4	5	-47100.5	0	-6.94605	101.906	66.6249	23.8028	1.83333	13.798	3.07307	24.6667
115	4	5	-42791	0	-6.46572	95.4398	69.224	24.8046	1.91667	12.9225	3.18485	24.6667
120	4	5	-38779.4	0	-6.01871	89.4211	71.6221	25.742	2	12.1076	3.28633	24.6667
125	4	5	-35045	0	-5.60272	83.8184	73.8333	26.6193	2.08333	11.349	3.37827	24.6667
130	4	5	-31568.5	0	-5.21559	78.6028	75.8706	27.4407	2.16667	10.6428	3.46134	24.6667
135	4	5	-28332	0	-4.85532	73.7475	77.7461	28.2101	2.25	9.98541	3.53619	24.6667
140	4	5	-25319	0	-4.52004	69.2274	79.4711	28.931	2.33333	9.37339	3.60341	24.6667
145	4	5	-22513.9	0	-4.20802	65.0194	81.0562	29.6069	2.41667	8.80363	3.66354	24.6667
150	4	5	-19902.3	0	-3.91765	61.1018	82.511	30.2408	2.5	8.27318	3.71711	24.6667
155	4	5	-17470.7	0	-3.64742	57.4544	83.8448	30.8356	2.58333	7.77932	3.7646	24.6667
160	4	5	-15206.7	0	-3.39594	54.0584	85.0658	31.394	2.66667	7.31951	3.80644	24.6667
165	4	5	-13098.6	0	-3.16191	50.8965	86.1821	31.9185	2.75	6.89138	3.84305	24.6667
170	4	5	-11135.6	0	-2.94411	47.9524	87.201	32.4114	2.83333	6.49275	3.87483	24.6667
175	4	5	-9307.76	0	-2.74142	45.211	88.1292	32.875	2.91667	6.12156	3.90211	24.6667
180	4	5	-7605.56	0	-2.55279	42.6582	88.9731	33.3112	3	5.77592	3.92524	24.6667
185	4	5	-6020.34	0	-2.37725	40.2809	89.7387	33.7219	3.08333	5.45404	3.94453	24.6667
190	4	5	-4543.97	0	-2.21388	38.067	90.4314	34.1089	3.16667	5.15428	3.96026	24.6667
195	4	5	-3168.91	0	-2.06184	36.0052	91.0564	34.4739	3.25	4.8751	3.97271	24.6667
200	4	5	-1888.13	0	-1.92035	34.0849	91.6183	34.8182	3.33333	4.61509	3.98211	24.6667
205	4	5	-695.1	0	-1.78867	32.2962	92.1217	35.1433	3.41667	4.3729	3.98871	24.6667
210	4	5	416.278	416.278	-1.66613	30.6301	92.5706	35.4506	3.5	4.14731	3.99271	24.7245
215	4	5	1035.38	1035.38	-1.55208	29.6561	92.9689	35.7413	3.58333	4.01544	3.99432	24.8683
220	4	5	1020.41	1020.41	-1.48466	29.6095	93.3369	36.0222	3.66667	4.00913	3.99454	25.01
225	4	5	1061.53	1061.53	-1.4795	29.5473	93.7016	36.3025	3.75	4.0007	3.9947	25.1574
230	4	5	1056.33	1056.33	-1.47331	29.5483	94.0626	36.5821	3.83333	4.00084	3.99476	25.3042
235	4	5	1058.01	1058.01	-1.47138	29.544	94.4217	36.8616	3.91667	4.00026	3.99482	25.4511
240	4	5	1056.12	1056.12	-1.46911	29.5444	94.7788	37.141	4	4.00031	3.99488	25.5978
245	4	5	1054.94	1054.94	-1.46716	29.5441	95.134	37.4202	4.08333	4.00026	3.99493	25.7443
250	4	5	1053.49	1053.49	-1.46517	29.5441	95.4874	37.6994	4.16667	4.00027	3.99499	25.8906
255	4	5	1052.1	1052.1	-1.46321	29.5441	95.8389	37.9784	4.25	4.00026	3.99505	26.0367
260	4	5	1050.7	1050.7	-1.46126	29.5441	96.1885	38.2574	4.33333	4.00026	3.9951	26.1827
265	4	5	1049.31	1049.31	-1.45932	29.544	96.5362	38.5362	4.41667	4.00026	3.99515	26.3284
270	4	5	1047.93	1047.93	-1.45739	29.544	96.8822	38.815	4.5	4.00026	3.99521	26.474
275	4	5	1046.56	1046.56	-1.45547	29.544	97.2263	39.0936	4.58333	4.00026	3.99526	26.6193
280	4	5	1045.19	1045.19	-1.45356	29.544	97.5686	39.3722	4.66667	4.00026	3.99531	26.7645
285	4	5	1043.83	1043.83	-1.45166	29.544	97.909	39.6506	4.75	4.00026	3.99536	26.9095
290	4	5	1042.47	1042.47	-1.44977	29.544	98.2477	39.9289	4.83333	4.00026	3.99541	27.0542
295	4	5	1041.12	1041.12	-1.44789	29.544	98.5846	40.2071	4.91667	4.00025	3.99546	27.1988
300	4	5	1039.78	1039.78	-1.44601	29.544	98.9198	40.4853	5	4.00025	3.99551	27.3433
305	4	5	1038.45	1038.45	-1.44415	29.544	99.2531	40.7633	5.08333	4.00025	3.99556	27.4875
310	4	5	1037.12	1037.12	-1.4423	29.544	99.5847	41.0412	5.16667	4.00025	3.99561	27.6315
315	4	5	1035.8	1035.8	-1.44045	29.5439	99.9145	41.319	5.25	4.00025	3.99566	27.7754
320	4	5	1034.48	1034.48	-1.43862	29.5439	100.243	41.5967	5.33333	4.00025	3.99571	27.9191
325	4	5	1033.18	1033.18	-1.43679	29.5439	100.569	41.8743	5.41667	4.00025	3.99576	28.0626
330	4	5	1031.87	1031.87	-1.43497	29.5439	100.894	42.1519	5.5	4.00025	3.9958	28.2059
335	4	5	1030.58	1030.58	-1.43317	29.5439	101.217	42.4293	5.58333	4.00024	3.99585	28.349
340	4	5	1029.29	1029.29	-1.43137	29.5439	101.538	42.7066	5.66667	4.00024	3.9959	28.492
345	4	5	1028.01	1028.01	-1.42958	29.5439	101.857	42.9838	5.75	4.00024	3.99594	28.6348
350	4	5	1026.73	1026.73	-1.4278	29.5439	102.175	43.2609	5.83333	4.00024	3.99599	28.7774
355	4	5	1025.46	1025.46	-1.42603	29.5439	102.491	43.5378	5.91667	4.00024	3.99603	28.9198
360	4	5	1024.2	1024.2	-1.42426	29.5439	102.806	43.8147	6	4.00024	3.99607	29.062
365	4	5	1022.94	1022.94	-1.42251	29.5439	103.119	44.0915	6.08333	4.00024	3.99612	29.2041
370	4	5	1021.69	1021.69	-1.42076	29.5438	103.43	44.3682	6.16667	4.00024	3.99616	29.346
375	4	5	1020.45	1020.45	-1.41903	29.5438	103.739	44.6448	6.25	4.00024	3.9962	29.4877
380	4	5	1019.21	1019.21	-1.4173	29.5438	104.047	44.9213	6.33333	4.00023	3.99624	29.6293
385	4	5	1017.98	1017.98	-1.41558	29.5438	104.354	45.1977	6.41667	4.00023	3.99629	29.7707
390	4	5	1016.75	1016.75	-1.41387	29.5438	104.658	45.4739	6.5	4.00023	3.99633	29.9119
395	4	5	1015.53	1015.53	-1.41217	29.5438	104.961	45.7501	6.58333	4.00023	3.99637	30.0529
400	4	5	1014.32	1014.32	-1.41047	29.5438	105.263	46.0262	6.66667	4.00023	3.99641	30.1938
405	4	5	1013.11	1013.11	-1.40879	29.5438	105.563	46.3021	6.75	4.00023	3.99645	30.3345
410	4	5	1011.91	1011.91	-1.40711	29.5438	105.861	46.578	6.83333	4.00023	3.99649	30.4751
415	4	5	1010.72	1010.72	-1.40544	29.5438	106.158	46.8538	6.91667	4.00023	3.99653	30.6155
420	4	5	1009.53	1009.53	-1.40378	29.5438	106.453	47.1294	7	4.00022	3.99657	30.7557
425	4	5	1008.34	1008.34	-1.40213	29.5438	106.746	47.405	7.08333	4.00022	3.9966	30.8957
430	4	5	1007.17	1007.17	-1.40049	29.5437	107.038	47.6805	7.16667	4.00022	3.99664	31.0356
435	4	5	1005.99	1005.99	-1.39885	29.5437	107.329	47.9558	7.25	4.00022	3.99668	31.1753
440	4	5	1004.83	1004.83	-1.39722	29.5437	107.618	48.2311	7.33333	4.00022	3.99672	31.3149
445	4	5	1003.67	1003.67	-1.3956	29.5437	107.905	48.5062	7.41667	4.00022	3.99675	31.4543
450	4	5	1002.51	1002.51	-1.39399	29.5437	108.191	48.7813	7.5	4.00022	3.99679	31.5935
455	4	5	1001.36	1001.36	-1.39239	29.5437	108.476	49.0562	7.58333	4.00022	3.99682	31.7326
460	4	5	1000.22	1000.22	-1.39079	29.5437	108.759	49.3311	7.66667	4.00022	3.99686	31.8715
465	4	5	999.084	999.084	-1.3892	29.5437	109.04	49.6058	7.75	4.00021	3.99689	32.0103
470	4	5	997.953	997.953	-1.38762	29.5437	109.32	49.8805	7.83333	4.00021	3.99693	32.1489
475	4	5	996.827	996.827	-1.38605	29.5437	109.598	50.155	7.91667	4.00021	3.99696	32.2873
480	4	5	995.706	995.706	-1.38449	29.5437	109.875	50.4294	8	4.00021	3.997	32.4256
485	4	5	994.591	994.591	-1.38293	29.5437	110.151	50.7038	8.08333	4.00021	3.99703	32.5638
490	4	5	993.482	993.482	-1.38138	29.5437	110.425	50.978	8.16667	4.00021	3.99706	32.7017
495	4	5	992.378	992.378	-1.37984	29.5436	110.697	51.2522	8.25	4.00021	3.9971	32.8396
500	4	5	991.28	991.28	-1.37831	29.5436	110.969	51.5262	8.33333	4.00021	3.99713	32.9773
505	4	5	990.187	990.187	-1.37678	29.5436	111.238	51.8001	8.41667	4.00021	3.99716	33.1148
510	4	5	989.099	989.099	-1.37527	29.5436	111.507	52.074	8.5	4.00021	3.99719	33.2522
515	4	5	988.017	988.017	-1.37376	29.5436	111.774	52.3477	8.58333	4.0002	3.99722	33.3894
520	4	5	986.94	986.94	-1.37225	29.5436	112.039	52.6213	8.66667	4.0002	3.99725	33.5265
525	4	5	985.869	985.869	-1.37076	29.5436	112.303	52.8948	8.75	4.0002	3.99729	33.6634
530	4	5	984.802	984.802	-1.36927	29.5436	112.566	53.1683	8.83333	4.0002	3.99732	33.8002
535	4	5	983.741	983.741	-1.36779	29.5436	112.827	53.4416	8.91667	4.0002	3.99735	33.9368
540	4	5	982.686	982.686	-1.36631	29.5436	113.087	53.7148	9	4.0002	3.99738	34.0733
545	4	5	981.635	981.635	-1.36485	29.5436	113.346	53.9879	9.08333	4.0002	3.99741	34.2096
550	4	5	980.59	980.59	-1.36339	29.5436	113.603	54.261	9.16667	4.0002	3.99743	34.3458
555	4	5	979.55	979.55	-1.36194	29.5436	113.859	54.5339	9.25	4.0002	3.99746	34.4819
560	4	5	978.515	978.515	-1.36049	29.5435	114.113	54.8067	9.33333	4.0002	3.99749	34.6178
565	4	5	977.485	977.485	-1.35906	29.5435	114.366	55.0794	9.41667	4.00019	3.99752	34.7535
570	4	5	976.46	976.46	-1.35763	29.5435	114.618	55.352	9.5	4.00019	3.99755	34.8891
575	4	5	975.44	975.44	-1.3562	29.5435	114.869	55.6245	9.58333	4.00019	3.99758	35.0246
580	4	5	974.426	974.426	-1.35479	29.5435	115.118	55.897	9.66667	4.00019	3.9976	35.16
585	4	5	973.416	973.416	-1.35338	29.5435	115.366	56.1693	9.75	4.00019	3.99763	35.2951
590	4	5	972.411	972.411	-1.35197	29.5435	115.612	56.4415	9.83333	4.00019	3.99766	35.4302
595	4	5	971.411	971.411	-1.35058	29.5435	115.857	56.7136	9.91667	4.00019	3.99768	35.5651
600	4	5	970.417	970.417	-1.34919	29.5435	116.101	56.9856	10	4.00019	3.99771	35.6999
605	4	5	969.427	969.427	-1.34781	29.5435	116.344	57.2575	10.0833	4.00019	3.99773	35.8345
610	4	5	968.442	968.442	-1.34643	29.5435	116.585	57.5293	10.1667	4.00019	3.99776	35.9691
615	4	5	967.461	967.461	-1.34506	29.5435	116.826	57.801	10.25	4.00019	3.99779	36.1034
620	4	5	966.486	966.486	-1.3437	29.5435	117.064	58.0726	10.3333	4.00018	3.99781	36.2377
625	4	5	965.515	965.515	-1.34235	29.5435	117.302	58.3442	10.4167	4.00018	3.99784	36.3718
630	4	5	964.549	964.549	-1.341	29.5435	117.538	58.6156	10.5	4.00018	3.99786	36.5057
635	4	5	963.588	963.588	-1.33966	29.5434	117.773	58.8869	10.5833	4.00018	3.99788	36.6396
640	4	5	962.632	962.632	-1.33832	29.5434	118.007	59.1581	10.6667	4.00018	3.99791	36.7733
645	4	5	961.68	961.68	-1.337	29.5434	118.24	59.4292	10.75	4.00018	3.99793	36.9068
650	4	5	960.733	960.733	-1.33567	29.5434	118.471	59.7002	10.8333	4.00018	3.99795	37.0403
655	4	5	959.791	959.791	-1.33436	29.5434	118.701	59.9711	10.9167	4.00018	3.99798	37.1736
660	4	5	958.853	958.853	-1.33305	29.5434	118.93	60.2419	11	4.00018	3.998	37.3067
665	4	5	957.92	957.92	-1.33175	29.5434	119.158	60.5126	11.0833	4.00018	3.99802	37.4398
670	4	5	956.991	956.991	-1.33045	29.5434	119.384	60.7832	11.1667	4.00018	3.99805	37.5727
675	4	5	956.067	956.067	-1.32916	29.5434	119.61	61.0537	11.25	4.00017	3.99807	37.7055
680	4	5	955.147	955.147	-1.32788	29.5434	119.834	61.3241	11.3333	4.00017	3.99809	37.8381
685	4	5	954.232	954.232	-1.3266	29.5434	120.057	61.5944	11.4167	4.00017	3.99811	37.9707
690	4	5	953.322	953.322	-1.32533	29.5434	120.279	61.8646	11.5	4.00017	3.99813	38.1031
695	4	5	952.416	952.416	-1.32406	29.5434	120.499	62.1347	11.5833	4.00017	3.99815	38.2354
700	4	5	951.514	951.514	-1.32281	29.5434	120.719	62.4047	11.6667	4.00017	3.99818	38.3675
705	4	5	950.617	950.617	-1.32155	29.5434	120.937	62.6746	11.75	4.00017	3.9982	38.4995
710	4	5	949.724	949.724	-1.32031	29.5433	121.154	62.9444	11.8333	4.00017	3.99822	38.6314
715	4	5	948.835	948.835	-1.31907	29.5433	121.37	63.2142	11.9167	4.00017	3.99824	38.7632
720	4	5	947.951	947.951	-1.31783	29.5433	121.585	63.4838	12	4.00017	3.99826	38.8949
725	4	5	947.071	947.071	-1.3166	29.5433	121.799	63.7533	12.0833	4.00017	3.99828	39.0264
730	4	5	946.196	946.196	-1.31538	29.5433	122.011	64.0227	12.1667	4.00017	3.9983	39.1578
735	4	5	945.324	945.324	-1.31417	29.5433	122.223	64.292	12.25	4.00016	3.99832	39.2891
740	4	5	944.457	944.457	-1.31296	29.5433	122.433	64.5612	12.3333	4.00016	3.99834	39.4203
745	4	5	943.594	943.594	-1.31175	29.5433	122.642	64.8303	12.4167	4.00016	3.99835	39.5514
750	4	5	942.736	942.736	-1.31055	29.5433	122.85	65.0993	12.5	4.00016	3.99837	39.6823
755	4	5	941.881	941.881	-1.30936	29.5433	123.057	65.3682	12.5833	4.00016	3.99839	39.8131
760	4	5	941.031	941.031	-1.30817	29.5433	123.263	65.637	12.6667	4.00016	3.99841	39.9438
765	4	5	940.185	940.185	-1.30699	29.5433	123.468	65.9057	12.75	4.00016	3.99843	40.0744
770	4	5	939.343	939.343	-1.30582	29.5433	123.672	66.1743	12.8333	4.00016	3.99845	40.2049
775	4	5	938.505	938.505	-1.30465	29.5433	123.875	66.4428	12.9167	4.00016	3.99846	40.3352
780	4	5	937.671	937.671	-1.30348	29.5433	124.076	66.7112	13	4.00016	3.99848	40.4654
785	4	5	936.841	936.841	-1.30233	29.5433	124.277	66.9795	13.0833	4.00016	3.9985	40.5956
790	4	5	936.015	936.015	-1.30117	29.5433	124.476	67.2478	13.1667	4.00016	3.99852	40.7256
795	4	5	935.194	935.194	-1.30003	29.5432	124.675	67.5159	13.25	4.00016	3.99853	40.8555
800	4	5	934.376	934.376	-1.29889	29.5432	124.872	67.7839	13.3333	4.00015	3.99855	40.9852
805	4	5	933.562	933.562	-1.29775	29.5432	125.068	68.0518	13.4167	4.00015	3.99857	41.1149
810	4	5	932.752	932.752	-1.29662	29.5432	125.264	68.3196	13.5	4.00015	3.99858	41.2444
815	4	5	931.946	931.946	-1.29549	29.5432	125.458	68.5873	13.5833	4.00015	3.9986	41.3739
820	4	5	931.144	931.144	-1.29437	29.5432	125.651	68.8549	13.6667	4.00015	3.99862	41.5032
825	4	5	930.346	930.346	-1.29326	29.5432	125.843	69.1225	13.75	4.00015	3.99863	41.6324
830	4	5	929.551	929.551	-1.29215	29.5432	126.035	69.3899	13.8333	4.00015	3.99865	41.7615
835	4	5	928.761	928.761	-1.29105	29.5432	126.225	69.6572	13.9167	4.00015	3.99866	41.8905
840	4	5	927.974	927.974	-1.28995	29.5432	126.414	69.9244	14	4.00015	3.99868	42.0194
845	4	5	927.192	927.192	-1.28886	29.5432	126.602	70.1915	14.0833	4.00015	3.9987	42.1482
850	4	5	926.412	926.412	-1.28777	29.5432	126.79	70.4585	14.1667	4.00015	3.99871	42.2768
855	4	5	925.637	925.637	-1.28669	29.5432	126.976	70.7255	14.25	4.00015	3.99873	42.4054
860	4	5	924.866	924.866	-1.28561	29.5432	127.161	70.9923	14.3333	4.00015	3.99874	42.5339
865	4	5	924.098	924.098	-1.28454	29.5432	127.345	71.259	14.4167	4.00015	3.99875	42.6622
870	4	5	923.334	923.334	-1.28347	29.5432	127.529	71.5256	14.5	4.00014	3.99877	42.7904
875	4	5	922.573	922.573	-1.28241	29.5432	127.711	71.7922	14.5833	4.00014	3.99878	42.9186
880	4	5	921.816	921.816	-1.28136	29.5432	127.892	72.0586	14.6667	4.00014	3.9988	43.0466
885	4	5	921.063	921.063	-1.28031	29.5432	128.073	72.3249	14.75	4.00014	3.99881	43.1745
890	4	5	920.314	920.314	-1.27926	29.5431	128.252	72.5912	14.8333	4.00014	3.99883	43.3024
895	4	5	919.568	919.568	-1.27822	29.5431	128.431	72.8573	14.9167	4.00014	3.99884	43.4301
900	4	5	918.826	918.826	-1.27718	29.5431	128.608	73.1233	15	4.00014	3.99885	43.5577
905	4	5	918.087	918.087	-1.27615	29.5431	128.785	73.3893	15.0833	4.00014	3.99887	43.6852
910	4	5	917.352	917.352	-1.27513	29.5431	128.961	73.6551	15.1667	4.00014	3.99888	43.8126
915	4	5	916.62	916.62	-1.2741	29.5431	129.135	73.9208	15.25	4.00014	3.99889	43.9399
920	4	5	915.892	915.892	-1.27309	29.5431	129.309	74.1865	15.3333	4.00014	3.99891	44.0671
925	4	5	915.167	915.167	-1.27208	29.5431	129.482	74.452	15.4167	4.00014	3.99892	44.1942
930	4	5	914.446	914.446	-1.27107	29.5431	129.654	74.7175	15.5	4.00014	3.99893	44.3212
935	4	5	913.728	913.728	-1.27007	29.5431	129.825	74.9828	15.5833	4.00014	3.99894	44.4481
940	4	5	913.014	913.014	-1.26907	29.5431	129.995	75.2481	15.6667	4.00013	3.99896	44.575
945	4	5	912.303	912.303	-1.26808	29.5431	130.165	75.5132	15.75	4.00013	3.99897	44.7017
950	4	5	911.596	911.596	-1.26709	29.5431	130.333	75.7783	15.8333	4.00013	3.99898	44.8283
955	4	5	910.892	910.892	-1.26611	29.5431	130.501	76.0432	15.9167	4.00013	3.99899	44.9548
960	4	5	910.191	910.191	-1.26513	29.5431	130.667	76.3081	16	4.00013	3.999	45.0812
965	4	5	909.494	909.494	-1.26416	29.5431	130.833	76.5728	16.0833	4.00013	3.99902	45.2075
970	4	5	908.8	908.8	-1.26319	29.5431	130.998	76.8375	16.1667	4.00013	3.99903	45.3337
975	4	5	908.109	908.109	-1.26223	29.5431	131.162	77.1021	16.25	4.00013	3.99904	45.4599
980	4	5	907.422	907.422	-1.26127	29.5431	131.325	77.3665	16.3333	4.00013	3.99905	45.5859
985	4	5	906.738	906.738	-1.26031	29.5431	131.487	77.6309	16.4167	4.00013	3.99906	45.7118
990	4	5	906.057	906.057	-1.25936	29.5431	131.649	77.8951	16.5	4.00013	3.99907	45.8377
995	4	5	905.379	905.379	-1.25842	29.543	131.809	78.1593	16.5833	4.00013	3.99908	45.9634
1000	4	5	904.705	904.705	-1.25748	29.543	131.969	78.4234	16.6667	4.00013	3.9991	46.0891
1005	4	5	904.034	904.034	-1.25654	29.543	132.128	78.6874	16.75	4.00013	3.99911	46.2146
1010	4	5	903.366	903.366	-1.25561	29.543	132.286	78.9512	16.8333	4.00013	3.99912	46.3401
1015	4	5	902.701	902.701	-1.25468	29.543	132.443	79.215	16.9167	4.00013	3.99913	46.4655
1020	4	5	902.04	902.04	-1.25376	29.543	132.6	79.4787	17	4.00013	3.99914	46.5908
1025	4	5	901.381	901.381	-1.25284	29.543	132.755	79.7423	17.0833	4.00012	3.99915	46.716
1030	4	5	900.726	900.726	-1.25192	29.543	132.91	80.0058	17.1667	4.00012	3.99916	46.8411
1035	4	5	900.074	900.074	-1.25101	29.543	133.064	80.2692	17.25	4.00012	3.99917	46.9661
1040	4	5	899.425	899.425	-1.25011	29.543	133.217	80.5324	17.3333	4.00012	3.99918	47.091
1045	4	5	898.779	898.779	-1.24921	29.543	133.369	80.7956	17.4167	4.00012	3.99919	47.2158
1050	4	5	898.136	898.136	-1.24831	29.543	133.521	81.0587	17.5	4.00012	3.9992	47.3406
1055	4	5	897.496	897.496	-1.24742	29.543	133.671	81.3217	17.5833	4.00012	3.99921	47.4652
1060	4	5	896.859	896.859	-1.24653	29.543	133.821	81.5846	17.6667	4.00012	3.99922	47.5898
1065	4	5	896.225	896.225	-1.24564	29.543	133.97	81.8474	17.75	4.00012	3.99923	47.7142
1070	4	5	895.594	895.594	-1.24476	29.543	134.119	82.1101	17.8333	4.00012	3.99924	47.8386
1075	4	5	894.967	894.967	-1.24389	29.543	134.266	82.3727	17.9167	4.00012	3.99924	47.9629
1080	4	5	894.342	894.342	-1.24301	29.543	134.413	82.6353	18	4.00012	3.99925	48.0872
1085	4	5	893.72	893.72	-1.24215	29.543	134.559	82.8977	18.0833	4.00012	3.99926	48.2113
1090	4	5	893.101	893.101	-1.24128	29.543	134.704	83.16	18.1667	4.00012	3.99927	48.3353
1095	4	5	892.485	892.485	-1.24042	29.543	134.849	83.4222	18.25	4.00012	3.99928	48.4593
1100	4	5	891.872	891.872	-1.23957	29.543	134.992	83.6843	18.3333	4.00012	3.99929	48.5831
1105	4	5	891.261	891.261	-1.23871	29.543	135.135	83.9464	18.4167	4.00012	3.9993	48.7069
1110	4	5	890.654	890.654	-1.23787	29.543	135.278	84.2083	18.5	4.00011	3.99931	48.8306
1115	4	5	890.049	890.049	-1.23702	29.5429	135.419	84.4701	18.5833	4.00011	3.99931	48.9543
1120	4	5	889.448	889.448	-1.23618	29.5429	135.56	84.7319	18.6667	4.00011	3.99932	49.0778
1125	4	5	888.849	888.849	-1.23535	29.5429	135.7	84.9935	18.75	4.00011	3.99933	49.2012
1130	4	5	888.253	888.253	-1.23452	29.5429	135.839	85.255	18.8333	4.00011	3.99934	49.3246
1135	4	5	887.66	887.66	-1.23369	29.5429	135.977	85.5165	18.9167	4.00011	3.99935	49.4479
1140	4	5	887.069	887.069	-1.23286	29.5429	136.115	85.7778	19	4.00011	3.99936	49.5711
1145	4	5	886.482	886.482	-1.23204	29.5429	136.252	86.0391	19.0833	4.00011	3.99936	49.6942
1150	4	5	885.897	885.897	-1.23123	29.5429	136.388	86.3002	19.1667	4.00011	3.99937	49.8173
1155	4	5	885.315	885.315	-1.23042	29.5429	136.524	86.5613	19.25	4.00011	3.99938	49.9402
1160	4	5	884.735	884.735	-1.22961	29.5429	136.659	86.8223	19.3333	4.00011	3.99939	50.0631
1165	4	5	884.159	884.159	-1.2288	29.5429	136.793	87.0831	19.4167	4.00011	3.99939	50.1859
1170	4	5	883.585	883.585	-1.228	29.5429	136.926	87.3439	19.5	4.00011	3.9994	50.3086
1175	4	5	883.013	883.013	-1.2272	29.5429	137.059	87.6046	19.5833	4.00011	3.99941	50.4313
1180	4	5	882.445	882.445	-1.22641	29.5429	137.191	87.8651	19.6667	4.00011	3.99942	50.5538
1185	4	5	881.879	881.879	-1.22562	29.5429	137.322	88.1256	19.75	4.00011	3.99942	50.6763
1190	4	5	881.316	881.316	-1.22484	29.5429	137.453	88.386	19.8333	4.00011	3.99943	50.7987
1195	4	5	880.755	880.755	-1.22405	29.5429	137.583	88.6463	19.9167	4.00011	3.99944	50.921
1200	4	5	880.197	880.197	-1.22327	29.5429	137.712	88.9065	20	4.00011	3.99944	51.0433
1205	4	5	879.641	879.641	-1.2225	29.5429	137.841	89.1666	20.0833	4.0001	3.99945	51.1655
1210	4	5	879.088	879.088	-1.22173	29.5429	137.969	89.4266	20.1667	4.0001	3.99946	51.2876
1215	4	5	878.538	878.538	-1.22096	29.5429	138.096	89.6865	20.25	4.0001	3.99946	51.4096
1220	4	5	877.99	877.99	-1.2202	29.5429	138.222	89.9463	20.3333	4.0001	3.99947	51.5315
1225	4	5	877.445	877.445	-1.21943	29.5429	138.348	90.206	20.4167	4.0001	3.99948	51.6534
1230	4	5	876.903	876.903	-1.21868	29.5429	138.473	90.4656	20.5	4.0001	3.99948	51.7752
1235	4	5	876.363	876.363	-1.21792	29.5429	138.598	90.7251	20.5833	4.0001	3.99949	51.8969
1240	4	5	875.825	875.825	-1.21717	29.5429	138.722	90.9845	20.6667	4.0001	3.9995	52.0185
1245	4	5	875.29	875.29	-1.21643	29.5428	138.845	91.2438	20.75	4.0001	3.9995	52.1401
1250	4	5	874.757	874.757	-1.21568	29.5428	138.968	91.5031	20.8333	4.0001	3.99951	52.2616
1255	4	5	874.227	874.227	-1.21494	29.5428	139.09	91.7622	20.9167	4.0001	3.99952	52.383
1260	4	5	873.7	873.7	-1.21421	29.5428	139.211	92.0212	21	4.0001	3.99952	52.5044
1265	4	5	873.174	873.174	-1.21348	29.5428	139.332	92.2802	21.0833	4.0001	3.99953	52.6256
1270	4	5	872.652	872.652	-1.21275	29.5428	139.452	92.539	21.1667	4.0001	3.99953	52.7468
1275	4	5	872.131	872.131	-1.21202	29.5428	139.571	92.7978	21.25	4.0001	3.99954	52.868
1280	4	5	871.613	871.613	-1.2113	29.5428	139.69	93.0564	21.3333	4.0001	3.99955	52.989
1285	4	5	871.098	871.098	-1.21058	29.5428	139.808	93.315	21.4167	4.0001	3.99955	53.11
1290	4	5	870.584	870.584	-1.20986	29.5428	139.925	93.5734	21.5	4.0001	3.99956	53.2309
1295	4	5	870.074	870.074	-1.20915	29.5428	140.042	93.8318	21.5833	4.0001	3.99956	53.3518
1300	4	5	869.565	869.565	-1.20844	29.5428	140.159	94.0901	21.6667	4.0001	3.99957	53.4725
1305	4	5	869.059	869.059	-1.20773	29.5428	140.274	94.3483	21.75	4.0001	3.99957	53.5933
1310	4	5	868.555	868.555	-1.20703	29.5428	140.389	94.6063	21.8333	4.0001	3.99958	53.7139
1315	4	5	868.054	868.054	-1.20633	29.5428	140.504	94.8643	21.9167	4.00009	3.99958	53.8344
1320	4	5	867.555	867.555	-1.20563	29.5428	140.618	95.1222	22	4.00009	3.99959	53.9549
1325	4	5	867.058	867.058	-1.20494	29.5428	140.731	95.38	22.0833	4.00009	3.9996	54.0754
1330	4	5	866.563	866.563	-1.20425	29.5428	140.843	95.6377	22.1667	4.00009	3.9996	54.1957
1335	4	5	866.071	866.071	-1.20356	29.5428	140.955	95.8953	22.25	4.00009	3.99961	54.316
1340	4	5	865.581	865.581	-1.20288	29.5428	141.067	96.1528	22.3333	4.00009	3.99961	54.4362
1345	4	5	865.093	865.093	-1.2022	29.5428	141.178	96.4102	22.4167	4.00009	3.99962	54.5564
1350	4	5	864.608	864.608	-1.20152	29.5428	141.288	96.6675	22.5	4.00009	3.99962	54.6765
1355	4	5	864.124	864.124	-1.20085	29.5428	141.398	96.9248	22.5833	4.00009	3.99963	54.7965
1360	4	5	863.643	863.643	-1.20018	29.5428	141.507	97.1819	22.6667	4.00009	3.99963	54.9164
1365	4	5	863.165	863.165	-1.19951	29.5428	141.615	97.4389	22.75	4.00009	3.99964	55.0363
1370	4	5	862.688	862.688	-1.19884	29.5428	141.723	97.6958	22.8333	4.00009	3.99964	55.1561
1375	4	5	862.213	862.213	-1.19818	29.5428	141.831	97.9527	22.9167	4.00009	3.99964	55.2759
1380	4	5	861.741	861.741	-1.19752	29.5428	141.938	98.2094	23	4.00009	3.99965	55.3956
1385	4	5	861.271	861.271	-1.19687	29.5428	142.044	98.4661	23.0833	4.00009	3.99965	55.5152
1390	4	5	860.803	860.803	-1.19621	29.5428	142.15	98.7226	23.1667	4.00009	3.99966	55.6347
1395	4	5	860.337	860.337	-1.19556	29.5428	142.255	98.9791	23.25	4.00009	3.99966	55.7542
1400	4	5	859.873	859.873	-1.19492	29.5427	142.359	99.2355	23.3333	4.00009	3.99967	55.8737
1405	4	5	859.411	859.411	-1.19427	29.5427	142.463	99.4917	23.4167	4.00009	3.99967	55.993
1410	4	5	858.952	858.952	-1.19363	29.5427	142.567	99.7479	23.5	4.00009	3.99968	56.1123
1415	4	5	858.494	858.494	-1.19299	29.5427	142.67	100.004	23.5833	4.00009	3.99968	56.2316
1420	4	5	858.039	858.039	-1.19236	29.5427	142.772	100.26	23.6667	4.00009	3.99968	56.3507
1425	4	5	857.586	857.586	-1.19172	29.5427	142.874	100.516	23.75	4.00009	3.99969	56.4698
1430	4	5	857.134	857.134	-1.19109	29.5427	142.975	100.772	23.8333	4.00009	3.99969	56.5889
1435	4	5	856.685	856.685	-1.19047	29.5427	143.076	101.027	23.9167	4.00008	3.9997	56.7079
1440	4	5	856.238	856.238	-1.18984	29.5427	143.176	101.283	24	4.00008	3.9997	56.8268
1445	4	5	855.793	855.793	-1.18922	29.5427	143.276	101.538	24.0833	4.00008	3.99971	56.9457
1450	4	5	855.35	855.35	-1.1886	29.5427	143.375	101.794	24.1667	4.00008	3.99971	57.0645
1455	4	5	854.909	854.909	-1.18799	29.5427	143.474	102.049	24.25	4.00008	3.99971	57.1832
1460	4	5	854.469	854.469	-1.18738	29.5427	143.572	102.304	24.3333	4.00008	3.99972	57.3019
1465	4	5	854.032	854.032	-1.18677	29.5427	143.67	102.56	24.4167	4.00008	3.99972	57.4205
1470	4	5	853.597	853.597	-1.18616	29.5427	143.767	102.815	24.5	4.00008	3.99972	57.539
1475	4	5	853.164	853.164	-1.18555	29.5427	143.863	103.07	24.5833	4.00008	3.99973	57.6575
1480	4	5	852.733	852.733	-1.18495	29.5427	143.96	103.324	24.6667	4.00008	3.99973	57.776
1485	4	5	852.303	852.303	-1.18435	29.5427	144.055	103.579	24.75	4.00008	3.99974	57.8943
1490	4	5	851.876	851.876	-1.18376	29.5427	144.15	103.834	24.8333	4.00008	3.99974	58.0127
1495	4	5	851.45	851.45	-1.18316	29.5427	144.245	104.088	24.9167	4.00008	3.99974	58.1309
1500	4	5	851.027	851.027	-1.18257	29.5427	144.339	104.343	25	4.00008	3.99975	58.2491
1505	4	5	850.605	850.605	-1.18198	29.5427	144.433	104.597	25.0833	4.00008	3.99975	58.3673
1510	4	5	850.186	850.186	-1.1814	29.5427	144.526	104.852	25.1667	4.00008	3.99975	58.4853
1515	4	5	849.768	849.768	-1.18082	29.5427	144.618	105.106	25.25	4.00008	3.99976	58.6034
1520	4	5	849.352	849.352	-1.18024	29.5427	144.71	105.36	25.3333	4.00008	3.99976	58.7213
1525	4	5	848.938	848.938	-1.17966	29.5427	144.802	105.614	25.4167	4.00008	3.99976	58.8392
1530	4	5	848.525	848.525	-1.17908	29.5427	144.893	105.868	25.5	4.00008	3.99977	58.9571
1535	4	5	848.115	848.115	-1.17851	29.5427	144.984	106.122	25.5833	4.00008	3.99977	59.0749
1540	4	5	847.706	847.706	-1.17794	29.5427	145.074	106.375	25.6667	4.00008	3.99977	59.1926
1545	4	5	847.299	847.299	-1.17737	29.5427	145.164	106.629	25.75	4.00008	3.99978	59.3103
1550	4	5	846.895	846.895	-1.17681	29.5427	145.253	106.882	25.8333	4.00008	3.99978	59.4279
1555	4	5	846.491	846.491	-1.17624	29.5427	145.342	107.136	25.9167	4.00008	3.99978	59.5455
1560	4	5	846.09	846.09	-1.17568	29.5427	145.43	107.389	26	4.00008	3.99979	59.663
1565	4	5	845.69	845.69	-1.17513	29.5427	145.518	107.642	26.0833	4.00008	3.99979	59.7805
1570	4	5	845.293	845.293	-1.17457	29.5427	145.605	107.896	26.1667	4.00008	3.99979	59.8979
1575	4	5	844.897	844.897	-1.17402	29.5427	145.692	108.149	26.25	4.00007	3.99979	60.0152
1580	4	5	844.502	844.502	-1.17347	29.5427	145.779	108.402	26.3333	4.00007	3.9998	60.1325
1585	4	5	844.11	844.11	-1.17292	29.5427	145.865	108.655	26.4167	4.00007	3.9998	60.2497
1590	4	5	843.719	843.719	-1.17238	29.5426	145.95	108.907	26.5	4.00007	3.9998	60.3669
1595	4	5	843.33	843.33	-1.17183	29.5426	146.035	109.16	26.5833	4.00007	3.99981	60.484
1600	4	5	842.943	842.943	-1.17129	29.5426	146.12	109.413	26.6667	4.00007	3.99981	60.6011
1605	4	5	842.557	842.557	-1.17076	29.5426	146.204	109.665	26.75	4.00007	3.99981	60.7181
1610	4	5	842.173	842.173	-1.17022	29.5426	146.288	109.918	26.8333	4.00007	3.99981	60.8351
1615	4	5	841.791	841.791	-1.16969	29.5426	146.371	110.17	26.9167	4.00007	3.99982	60.952
1620	4	5	841.411	841.411	-1.16916	29.5426	146.454	110.422	27	4.00007	3.99982	61.0689
1625	4	5	841.032	841.032	-1.16863	29.5426	146.536	110.674	27.0833	4.00007	3.99982	61.1857
1630	4	5	840.655	840.655	-1.1681	29.5426	146.618	110.926	27.1667	4.00007	3.99982	61.3025
1635	4	5	840.279	840.279	-1.16758	29.5426	146.7	111.178	27.25	4.00007	3.99983	61.4192
1640	4	5	839.905	839.905	-1.16706	29.5426	146.781	111.43	27.3333	4.00007	3.99983	61.5358
1645	4	5	839.533	839.533	-1.16654	29.5426	146.862	111.682	27.4167	4.00007	3.99983	61.6524
1650	4	5	839.162	839.162	-1.16602	29.5426	146.942	111.933	27.5	4.00007	3.99983	61.769
1655	4	5	838.794	838.794	-1.16551	29.5426	147.022	112.185	27.5833	4.00007	3.99984	61.8855
1660	4	5	838.426	838.426	-1.16499	29.5426	147.101	112.436	27.6667	4.00007	3.99984	62.0019
1665	4	5	838.061	838.061	-1.16448	29.5426	147.18	112.688	27.75	4.00007	3.99984	62.1183
1670	4	5	837.696	837.696	-1.16398	29.5426	147.259	112.939	27.8333	4.00007	3.99984	62.2347
1675	4	5	837.334	837.334	-1.16347	29.5426	147.337	113.19	27.9167	4.00007	3.99985	62.351
1680	4	5	836.973	836.973	-1.16297	29.5426	147.415	113.441	28	4.00007	3.99985	62.4672
1685	4	5	836.614	836.614	-1.16246	29.5426	147.492	113.692	28.0833	4.00007	3.99985	62.5834
1690	4	5	836.256	836.256	-1.16197	29.5426	147.569	113.943	28.1667	4.00007	3.99985	62.6995
1695	4	5	835.9	835.9	-1.16147	29.5426	147.646	114.194	28.25	4.00007	3.99986	62.8156
1700	4	5	835.545	835.545	-1.16097	29.5426	147.722	114.445	28.3333	4.00007	3.99986	62.9317
1705	4	5	835.192	835.192	-1.16048	29.5426	147.797	114.696	28.4167	4.00007	3.99986	63.0477
1710	4	5	834.84	834.84	-1.15999	29.5426	147.873	114.946	28.5	4.00007	3.99986	63.1636
1715	4	5	834.49	834.49	-1.1595	29.5426	147.948	115.197	28.5833	4.00007	3.99986	63.2795
1720	4	5	834.142	834.142	-1.15902	29.5426	148.022	115.447	28.6667	4.00007	3.99987	63.3954
1725	4	5	833.795	833.795	-1.15853	29.5426	148.096	115.697	28.75	4.00007	3.99987	63.5112
1730	4	5	833.449	833.449	-1.15805	29.5426	148.17	115.947	28.8333	4.00007	3.99987	63.627
1735	4	5	833.105	833.105	-1.15757	29.5426	148.243	116.197	28.9167	4.00006	3.99987	63.7427
1740	4	5	832.763	832.763	-1.15709	29.5426	148.316	116.447	29	4.00006	3.99987	63.8583
1745	4	5	832.421	832.421	-1.15662	29.5426	148.389	116.697	29.0833	4.00006	3.99988	63.9739
1750	4	5	832.082	832.082	-1.15614	29.5426	148.461	116.947	29.1667	4.00006	3.99988	64.0895
1755	4	5	831.744	831.744	-1.15567	29.5426	148.533	117.197	29.25	4.00006	3.99988	64.205
1760	4	5	831.407	831.407	-1.1552	29.5426	148.605	117.447	29.3333	4.00006	3.99988	64.3205
1765	4	5	831.072	831.072	-1.15473	29.5426	148.676	117.696	29.4167	4.00006	3.99988	64.4359
1770	4	5	830.738	830.738	-1.15427	29.5426	148.746	117.945	29.5	4.00006	3.99989	64.5513
1775	4	5	830.406	830.406	-1.15381	29.5426	148.817	118.195	29.5833	4.00006	3.99989	64.6666
1780	4	5	830.075	830.075	-1.15334	29.5426	148.887	118.444	29.6667	4.00006	3.99989	64.7819
1785	4	5	829.745	829.745	-1.15288	29.5426	148.956	118.693	29.75	4.00006	3.99989	64.8972
1790	4	5	829.417	829.417	-1.15243	29.5426	149.025	118.942	29.8333	4.00006	3.99989	65.0124
1795	4	5	829.091	829.091	-1.15197	29.5426	149.094	119.191	29.9167	4.00006	3.9999	65.1275
1800	4	5	828.765	828.765	-1.15152	29.5426	149.163	119.44	30	4.00006	3.9999	65.2426
1805	4	5	828.442	828.442	-1.15107	29.5426	149.231	119.689	30.0833	4.00006	3.9999	65.3577
1810	4	5	828.119	828.119	-1.15062	29.5426	149.299	119.938	30.1667	4.00006	3.9999	65.4727
1815	4	5	827.798	827.798	-1.15017	29.5426	149.366	120.186	30.25	4.00006	3.9999	65.5877
1820	4	5	827.478	827.478	-1.14972	29.5425	149.433	120.435	30.3333	4.00006	3.9999	65.7026
1825	4	5	827.16	827.16	-1.14928	29.5425	149.5	120.683	30.4167	4.00006	3.99991	65.8175
1830	4	5	826.843	826.843	-1.14884	29.5425	149.566	120.932	30.5	4.00006	3.99991	65.9323
1835	4	5	826.527	826.527	-1.14839	29.5425	149.632	121.18	30.5833	4.00006	3.99991	66.0471
1840	4	5	826.213	826.213	-1.14796	29.5425	149.698	121.428	30.6667	4.00006	3.99991	66.1619
1845	4	5	825.9	825.9	-1.14752	29.5425	149.763	121.676	30.75	4.00006	3.99991	66.2766
1850	4	5	825.588	825.588	-1.14709	29.5425	149.828	121.924	30.8333	4.00006	3.99991	66.3913
1855	4	5	825.278	825.278	-1.14665	29.5425	149.893	122.172	30.9167	4.00006	3.99991	66.5059
1860	4	5	824.969	824.969	-1.14622	29.5425	149.957	122.42	31	4.00006	3.99992	66.6205
1865	4	5	824.661	824.661	-1.14579	29.5425	150.021	122.667	31.0833	4.00006	3.99992	66.735
1870	4	5	824.355	824.355	-1.14536	29.5425	150.084	122.915	31.1667	4.00006	3.99992	66.8495
1875	4	5	824.05	824.05	-1.14494	29.5425	150.148	123.162	31.25	4.00006	3.99992	66.9639
1880	4	5	823.746	823.746	-1.14452	29.5425	150.211	123.41	31.3333	4.00006	3.99992	67.0783
1885	4	5	823.443	823.443	-1.14409	29.5425	150.273	123.657	31.4167	4.00006	3.99992	67.1927
1890	4	5	823.142	823.142	-1.14367	29.5425	150.335	123.904	31.5	4.00006	3.99992	67.307
1895	4	5	822.842	822.842	-1.14325	29.5425	150.397	124.151	31.5833	4.00006	3.99993	67.4213
1900	4	5	822.543	822.543	-1.14284	29.5425	150.459	124.399	31.6667	4.00006	3.99993	67.5356
1905	4	5	822.246	822.246	-1.14242	29.5425	150.52	124.645	31.75	4.00006	3.99993	67.6498
1910	4	5	821.949	821.949	-1.14201	29.5425	150.581	124.892	31.8333	4.00006	3.99993	67.7639
1915	4	5	821.654	821.654	-1.1416	29.5425	150.642	125.139	31.9167	4.00006	3.99993	67.878
1920	4	5	821.361	821.361	-1.14119	29.5425	150.702	125.386	32	4.00006	3.99993	67.9921
1925	4	5	821.068	821.068	-1.14078	29.5425	150.762	125.632	32.0833	4.00006	3.99993	68.1062
1930	4	5	820.777	820.777	-1.14037	29.5425	150.822	125.879	32.1667	4.00006	3.99994	68.2202
1935	4	5	820.487	820.487	-1.13997	29.5425	150.881	126.125	32.25	4.00005	3.99994	68.3341
1940	4	5	820.198	820.198	-1.13957	29.5425	150.94	126.372	32.3333	4.00005	3.99994	68.448
1945	4	5	819.91	819.91	-1.13917	29.5425	150.999	126.618	32.4167	4.00005	3.99994	68.5619
1950	4	5	819.624	819.624	-1.13877	29.5425	151.057	126.864	32.5	4.00005	3.99994	68.6757
1955	4	5	819.338	819.338	-1.13837	29.5425	151.116	127.11	32.5833	4.00005	3.99994	68.7895
1960	4	5	819.054	819.054	-1.13797	29.5425	151.173	127.356	32.6667	4.00005	3.99994	68.9033
1965	4	5	818.771	818.771	-1.13758	29.5425	151.231	127.602	32.75	4.00005	3.99994	69.017
1970	4	5	818.489	818.489	-1.13718	29.5425	151.288	127.848	32.8333	4.00005	3.99994	69.1307
1975	4	5	818.209	818.209	-1.13679	29.5425	151.345	128.093	32.9167	4.00005	3.99995	69.2443
1980	4	5	817.929	817.929	-1.1364	29.5425	151.402	128.339	33	4.00005	3.99995	69.3579
1985	4	5	817.651	817.651	-1.13601	29.5425	151.458	128.584	33.0833	4.00005	3.99995	69.4715
1990	4	5	817.374	817.374	-1.13563	29.5425	151.514	128.83	33.1667	4.00005	3.99995	69.585
1995	4	5	817.098	817.098	-1.13524	29.5425	151.57	129.075	33.25	4.00005	3.99995	69.6985
2000	4	5	816.823	816.823	-1.13486	29.5425	151.625	129.32	33.3333	4.00005	3.99995	69.812
2005	4	5	816.549	816.549	-1.13448	29.5425	151.68	129.565	33.4167	4.00005	3.99995	69.9254
2010	4	5	816.277	816.277	-1.1341	29.5425	151.735	129.811	33.5	4.00005	3.99995	70.0387
2015	4	5	816.005	816.005	-1.13372	29.5425	151.79	130.055	33.5833	4.00005	3.99995	70.1521
2020	4	5	815.735	815.735	-1.13334	29.5425	151.844	130.3	33.6667	4.00005	3.99996	70.2654
2025	4	5	815.465	815.465	-1.13297	29.5425	151.898	130.545	33.75	4.00005	3.99996	70.3786
2030	4	5	815.197	815.197	-1.13259	29.5425	151.951	130.79	33.8333	4.00005	3.99996	70.4918
2035	4	5	814.93	814.93	-1.13222	29.5425	152.005	131.034	33.9167	4.00005	3.99996	70.605
2040	4	5	814.664	814.664	-1.13185	29.5425	152.058	131.279	34	4.00005	3.99996	70.7182
2045	4	5	814.399	814.399	-1.13148	29.5425	152.111	131.523	34.0833	4.00005	3.99996	70.8313
2050	4	5	814.136	814.136	-1.13111	29.5425	152.163	131.768	34.1667	4.00005	3.99996	70.9444
2055	4	5	813.873	813.873	-1.13075	29.5425	152.216	132.012	34.25	4.00005	3.99996	71.0574
2060	4	5	813.611	813.611	-1.13038	29.5425	152.268	132.256	34.3333	4.00005	3.99996	71.1704
2065	4	5	813.35	813.35	-1.13002	29.5425	152.319	132.5	34.4167	4.00005	3.99996	71.2834
2070	4	5	813.091	813.091	-1.12965	29.5425	152.371	132.744	34.5	4.00005	3.99997	71.3963
2075	4	5	812.832	812.832	-1.12929	29.5425	152.422	132.988	34.5833	4.00005	3.99997	71.5092
2080	4	5	812.575	812.575	-1.12894	29.5425	152.473	133.232	34.6667	4.00005	3.99997	71.622
2085	4	5	812.318	812.318	-1.12858	29.5425	152.524	133.475	34.75	4.00005	3.99997	71.7349
2090	4	5	812.063	812.063	-1.12822	29.5425	152.574	133.719	34.8333	4.00005	3.99997	71.8477
2095	4	5	811.809	811.809	-1.12787	29.5425	152.624	133.962	34.9167	4.00005	3.99997	71.9604
2100	4	5	811.555	811.555	-1.12751	29.5425	152.674	134.206	35	4.00005	3.99997	72.0731
2105	4	5	811.303	811.303	-1.12716	29.5425	152.724	134.449	35.0833	4.00005	3.99997	72.1858
2110	4	5	811.052	811.052	-1.12681	29.5425	152.773	134.692	35.1667	4.00005	3.99997	72.2984
2115	4	5	810.801	810.801	-1.12646	29.5425	152.822	134.936	35.25	4.00005	3.99997	72.4111
2120	4	5	810.552	810.552	-1.12611	29.5425	152.871	135.179	35.3333	4.00005	3.99997	72.5236
2125	4	5	810.304	810.304	-1.12577	29.5424	152.919	135.422	35.4167	4.00005	3.99997	72.6362
2130	4	5	810.057	810.057	-1.12542	29.5424	152.968	135.664	35.5	4.00005	3.99997	72.7487
2135	4	5	809.81	809.81	-1.12508	29.5424	153.016	135.907	35.5833	4.00005	3.99998	72.8612
2140	4	5	809.565	809.565	-1.12474	29.5424	153.063	136.15	35.6667	4.00005	3.99998	72.9736
2145	4	5	809.321	809.321	-1.1244	29.5424	153.111	136.393	35.75	4.00005	3.99998	73.086
2150	4	5	809.077	809.077	-1.12406	29.5424	153.158	136.635	35.8333	4.00005	3.99998	73.1984
2155	4	5	808.835	808.835	-1.12372	29.5424	153.205	136.877	35.9167	4.00005	3.99998	73.3107
2160	4	5	808.593	808.593	-1.12338	29.5424	153.252	137.12	36	4.00005	3.99998	73.423
2165	4	5	808.353	808.353	-1.12305	29.5424	153.299	137.362	36.0833	4.00005	3.99998	73.5353
2170	4	5	808.113	808.113	-1.12271	29.5424	153.345	137.604	36.1667	4.00005	3.99998	73.6475
2175	4	5	807.875	807.875	-1.12238	29.5424	153.391	137.846	36.25	4.00005	3.99998	73.7597
2180	4	5	807.637	807.637	-1.12205	29.5424	153.437	138.088	36.3333	4.00004	3.99998	73.8719
2185	4	5	807.4	807.4	-1.12172	29.5424	153.482	138.33	36.4167	4.00004	3.99998	73.984
2190	4	5	807.165	807.165	-1.12139	29.5424	153.528	138.572	36.5	4.00004	3.99998	74.0962
2195	4	5	806.93	806.93	-1.12106	29.5424	153.573	138.814	36.5833	4.00004	3.99998	74.2082
2200	4	5	806.696	806.696	-1.12074	29.5424	153.618	139.055	36.6667	4.00004	3.99998	74.3203
2205	4	5	806.463	806.463	-1.12041	29.5424	153.662	139.297	36.75	4.00004	3.99999	74.4323
2210	4	5	806.231	806.231	-1.12009	29.5424	153.707	139.538	36.8333	4.00004	3.99999	74.5443
2215	4	5	805.999	805.999	-1.11977	29.5424	153.751	139.78	36.9167	4.00004	3.99999	74.6562
2220	4	5	805.769	805.769	-1.11944	29.5424	153.795	140.021	37	4.00004	3.99999	74.7681
2225	4	5	805.54	805.54	-1.11913	29.5424	153.838	140.262	37.0833	4.00004	3.99999	74.88
2230	4	5	805.311	805.311	-1.11881	29.5424	153.882	140.503	37.1667	4.00004	3.99999	74.9918
2235	4	5	805.084	805.084	-1.11849	29.5424	153.925	140.744	37.25	4.00004	3.99999	75.1037
2240	4	5	804.857	804.857	-1.11817	29.5424	153.968	140.985	37.3333	4.00004	3.99999	75.2154
2245	4	5	804.631	804.631	-1.11786	29.5424	154.011	141.226	37.4167	4.00004	3.99999	75.3272
2250	4	5	804.406	804.406	-1.11754	29.5424	154.053	141.467	37.5	4.00004	3.99999	75.4389
2255	4	5	804.182	804.182	-1.11723	29.5424	154.096	141.707	37.5833	4.00004	3.99999	75.5506
2260	4	5	803.959	803.959	-1.11692	29.5424	154.138	141.948	37.6667	4.00004	3.99999	75.6623
2265	4	5	803.737	803.737	-1.11661	29.5424	154.179	142.188	37.75	4.00004	3.99999	75.7739
2270	4	5	803.515	803.515	-1.1163	29.5424	154.221	142.429	37.8333	4.00004	3.99999	75.8855
2275	4	5	803.295	803.295	-1.11599	29.5424	154.263	142.669	37.9167	4.00004	3.99999	75.9971
2280	4	5	803.075	803.075	-1.11569	29.5424	154.304	142.909	38	4.00004	3.99999	76.1086
2285	4	5	802.856	802.856	-1.11538	29.5424	154.345	143.149	38.0833	4.00004	3.99999	76.2201
2290	4	5	802.638	802.638	-1.11508	29.5424	154.385	143.389	38.1667	4.00004	3.99999	76.3316
2295	4	5	802.421	802.421	-1.11478	29.5424	154.426	143.629	38.25	4.00004	3.99999	76.443
2300	4	5	802.204	802.204	-1.11447	29.5424	154.466	143.869	38.3333	4.00004	4	76.5545
2305	4	5	801.988	801.988	-1.11417	29.5424	154.507	144.109	38.4167	4.00004	4	76.6658
2310	4	5	801.774	801.774	-1.11387	29.5424	154.546	144.348	38.5	4.00004	4	76.7772
2315	4	5	801.56	801.56	-1.11358	29.5424	154.586	144.588	38.5833	4.00004	4	76.8885
2320	4	5	801.347	801.347	-1.11328	29.5424	154.626	144.827	38.6667	4.00004	4	76.9998
2325	4	5	801.134	801.134	-1.11298	29.5424	154.665	145.067	38.75	4.00004	4	77.1111
2330	4	5	800.923	800.923	-1.11269	29.5424	154.704	145.306	38.8333	4.00004	4	77.2223
2335	4	5	800.712	800.712	-1.11239	29.5424	154.743	145.545	38.9167	4.00004	4	77.3335
2340	4	5	800.502	800.502	-1.1121	29.5424	154.782	145.785	39	4.00004	4	77.4447
2345	4	5	800.293	800.293	-1.11181	29.5424	154.82	146.024	39.0833	4.00004	4	77.5559
2350	4	5	800.085	800.085	-1.11152	29.5424	154.858	146.263	39.1667	4.00004	4	77.667
2355	4	5	799.877	799.877	-1.11123	29.5424	154.896	146.501	39.25	4.00004	4	77.7781
2360	4	5	799.671	799.671	-1.11094	29.5424	154.934	146.74	39.3333	4.00004	4	77.8892
2365	4	5	799.465	799.465	-1.11065	29.5424	154.972	146.979	39.4167	4.00004	4	78.0002
2370	4	5	799.259	799.259	-1.11037	29.5424	155.009	147.217	39.5	4.00004	4	78.1112
2375	4	5	799.055	799.055	-1.11008	29.5424	155.047	147.456	39.5833	4.00004	4	78.2222
2380	4	5	798.851	798.851	-1.1098	29.5424	155.084	147.694	39.6667	4.00004	4	78.3331
2385	4	5	798.648	798.648	-1.10952	29.5424	155.12	147.933	39.75	4.00004	4	78.4441
2390	4	5	798.446	798.446	-1.10923	29.5424	155.157	148.171	39.8333	4.00004	4	78.555
2395	4	5	798.245	798.245	-1.10895	29.5424	155.194	148.409	39.9167	4.00004	4	78.6658
2400	4	5	798.044	798.044	-1.10867	29.5424	155.23	148.647	40	4.00004	4	78.7767
2405	4	5	797.844	797.844	-1.1084	29.5424	155.266	148.885	40.0833	4.00004	4	78.8875
2410	4	5	797.645	797.645	-1.10812	29.5424	155.302	149.123	40.1667	4.00004	4	78.9983
2415	4	5	797.447	797.447	-1.10784	29.5424	155.338	149.361	40.25	4.00004	4	79.109
2420	4	5	797.249	797.249	-1.10757	29.5424	155.373	149.599	40.3333	4.00004	4.00001	79.2197
2425	4	5	797.052	797.052	-1.10729	29.5424	155.409	149.836	40.4167	4.00004	4.00001	79.3304
2430	4	5	796.856	796.856	-1.10702	29.5424	155.444	150.074	40.5	4.00004	4.00001	79.4411
2435	4	5	796.661	796.661	-1.10675	29.5424	155.479	150.311	40.5833	4.00004	4.00001	79.5518
2440	4	5	796.466	796.466	-1.10647	29.5424	155.513	150.549	40.6667	4.00004	4.00001	79.6624
2445	4	5	796.272	796.272	-1.1062	29.5424	155.548	150.786	40.75	4.00004	4.00001	79.773
2450	4	5	796.079	796.079	-1.10593	29.5424	155.582	151.023	40.8333	4.00004	4.00001	79.8835
2455	4	5	795.886	795.886	-1.10567	29.5424	155.617	151.26	40.9167	4.00004	4.00001	79.9941
2460	4	5	795.694	795.694	-1.1054	29.5424	155.651	151.497	41	4.00004	4.00001	80.1046
2465	4	5	795.503	795.503	-1.10513	29.5424	155.685	151.734	41.0833	4.00004	4.00001	80.2151
2470	4	5	795.312	795.312	-1.10487	29.5424	155.718	151.971	41.1667	4.00004	4.00001	80.3255
2475	4	5	795.123	795.123	-1.1046	29.5424	155.752	152.208	41.25	4.00004	4.00001	80.436
2480	4	5	794.933	794.933	-1.10434	29.5424	155.785	152.444	41.3333	4.00004	4.00001	80.5464
2485	4	5	794.745	794.745	-1.10408	29.5424	155.818	152.681	41.4167	4.00004	4.00001	80.6568
2490	4	5	794.557	794.557	-1.10381	29.5424	155.851	152.917	41.5	4.00004	4.00001	80.7671
2495	4	5	794.37	794.37	-1.10355	29.5424	155.884	153.154	41.5833	4.00004	4.00001	80.8775
2500	4	5	794.184	794.184	-1.10329	29.5424	155.917	153.39	41.6667	4.00004	4.00001	80.9878
2505	4	5	793.998	793.998	-1.10303	29.5424	155.949	153.626	41.75	4.00004	4.00001	81.098
2510	4	5	793.813	793.813	-1.10278	29.5424	155.982	153.863	41.8333	4.00003	4.00001	81.2083
2515	4	5	793.629	793.629	-1.10252	29.5424	156.014	154.099	41.9167	4.00003	4.00001	81.3185
2520	4	5	793.445	793.445	-1.10226	29.5424	156.046	154.335	42	4.00003	4.00001	81.4287
2525	4	5	793.262	793.262	-1.10201	29.5424	156.077	154.57	42.0833	4.00003	4.00001	81.5389
2530	4	5	793.08	793.08	-1.10175	29.5424	156.109	154.806	42.1667	4.00003	4.00001	81.649
2535	4	5	792.898	792.898	-1.1015	29.5424	156.141	155.042	42.25	4.00003	4.00001	81.7592
2540	4	5	792.717	792.717	-1.10125	29.5424	156.172	155.278	42.3333	4.00003	4.00001	81.8693
2545	4	5	792.536	792.536	-1.101	29.5424	156.203	155.513	42.4167	4.00003	4.00001	81.9793
2550	4	5	792.357	792.357	-1.10075	29.5424	156.234	155.748	42.5	4.00003	4.00001	82.0894
2555	4	5	792.178	792.178	-1.1005	29.5424	156.265	155.984	42.5833	4.00003	4.00001	82.1994
2560	4	5	791.999	791.999	-1.10025	29.5424	156.295	156.219	42.6667	4.00003	4.00001	82.3094
2565	4	5	791.821	791.821	-1.1	29.5424	156.326	156.454	42.75	4.00003	4.00001	82.4194
2570	4	5	791.644	791.644	-1.09975	29.5423	156.356	156.689	42.8333	4.00003	4.00001	82.5293
2575	4	5	791.467	791.467	-1.09951	29.5423	156.386	156.924	42.9167	4.00003	4.00001	82.6393
2580	4	5	791.291	791.291	-1.09926	29.5423	156.416	157.159	43	4.00003	4.00001	82.7492
2585	4	5	791.116	791.116	-1.09902	29.5423	156.446	157.394	43.0833	4.00003	4.00001	82.859
2590	4	5	790.941	790.941	-1.09877	29.5423	156.476	157.629	43.1667	4.00003	4.00001	82.9689
2595	4	5	790.767	790.767	-1.09853	29.5423	156.505	157.864	43.25	4.00003	4.00001	83.0787
2600	4	5	790.594	790.594	-1.09829	29.5423	156.535	158.098	43.3333	4.00003	4.00001	83.1885
2605	4	5	790.421	790.421	-1.09805	29.5423	156.564	158.333	43.4167	4.00003	4.00001	83.2983
2610	4	5	790.248	790.248	-1.09781	29.5423	156.593	158.567	43.5	4.00003	4.00001	83.4081
2615	4	5	790.077	790.077	-1.09757	29.5423	156.622	158.801	43.5833	4.00003	4.00002	83.5178
2620	4	5	789.906	789.906	-1.09733	29.5423	156.651	159.036	43.6667	4.00003	4.00002	83.6275
2625	4	5	789.735	789.735	-1.09709	29.5423	156.679	159.27	43.75	4.00003	4.00002	83.7372
2630	4	5	789.565	789.565	-1.09686	29.5423	156.708	159.504	43.8333	4.00003	4.00002	83.8469
2635	4	5	789.396	789.396	-1.09662	29.5423	156.736	159.738	43.9167	4.00003	4.00002	83.9565
2640	4	5	789.227	789.227	-1.09638	29.5423	156.764	159.972	44	4.00003	4.00002	84.0661
2645	4	5	789.059	789.059	-1.09615	29.5423	156.792	160.205	44.0833	4.00003	4.00002	84.1757
2650	4	5	788.892	788.892	-1.09592	29.5423	156.82	160.439	44.1667	4.00003	4.00002	84.2853
2655	4	5	788.725	788.725	-1.09568	29.5423	156.848	160.673	44.25	4.00003	4.00002	84.3948
2660	4	5	788.558	788.558	-1.09545	29.5423	156.875	160.906	44.3333	4.00003	4.00002	84.5043
2665	4	5	788.392	788.392	-1.09522	29.5423	156.903	161.14	44.4167	4.00003	4.00002	84.6138
2670	4	5	788.227	788.227	-1.09499	29.5423	156.93	161.373	44.5	4.00003	4.00002	84.7233
2675	4	5	788.062	788.062	-1.09476	29.5423	156.957	161.606	44.5833	4.00003	4.00002	84.8328
2680	4	5	787.898	787.898	-1.09453	29.5423	156.984	161.839	44.6667	4.00003	4.00002	84.9422
2685	4	5	787.735	787.735	-1.0943	29.5423	157.011	162.073	44.75	4.00003	4.00002	85.0516
2690	4	5	787.572	787.572	-1.09408	29.5423	157.037	162.306	44.8333	4.00003	4.00002	85.161
2695	4	5	787.409	787.409	-1.09385	29.5423	157.064	162.539	44.9167	4.00003	4.00002	85.2703
2700	4	5	787.247	787.247	-1.09362	29.5423	157.09	162.771	45	4.00003	4.00002	85.3797
2705	4	5	787.086	787.086	-1.0934	29.5423	157.117	163.004	45.0833	4.00003	4.00002	85.489
2710	4	5	786.925	786.925	-1.09318	29.5423	157.143	163.237	45.1667	4.00003	4.00002	85.5983
2715	4	5	786.765	786.765	-1.09295	29.5423	157.169	163.469	45.25	4.00003	4.00002	85.7076
2720	4	5	786.605	786.605	-1.09273	29.5423	157.195	163.702	45.3333	4.00003	4.00002	85.8168
2725	4	5	786.446	786.446	-1.09251	29.5423	157.22	163.934	45.4167	4.00003	4.00002	85.9261
2730	4	5	786.287	786.287	-1.09229	29.5423	157.246	164.167	45.5	4.00003	4.00002	86.0353
2735	4	5	786.129	786.129	-1.09207	29.5423	157.271	164.399	45.5833	4.00003	4.00002	86.1444
2740	4	5	785.972	785.972	-1.09185	29.5423	157.297	164.631	45.6667	4.00003	4.00002	86.2536
2745	4	5	785.815	785.815	-1.09163	29.5423	157.322	164.863	45.75	4.00003	4.00002	86.3627
2750	4	5	785.658	785.658	-1.09141	29.5423	157.347	165.095	45.8333	4.00003	4.00002	86.4719
2755	4	5	785.502	785.502	-1.09119	29.5423	157.372	165.327	45.9167	4.00003	4.00002	86.581
2760	4	5	785.347	785.347	-1.09098	29.5423	157.397	165.559	46	4.00003	4.00002	86.69
2765	4	5	785.192	785.192	-1.09076	29.5423	157.421	165.79	46.0833	4.00003	4.00002	86.7991
2770	4	5	785.037	785.037	-1.09054	29.5423	157.446	166.022	46.1667	4.00003	4.00002	86.9081
2775	4	5	784.883	784.883	-1.09033	29.5423	157.47	166.254	46.25	4.00003	4.00002	87.0171
2780	4	5	784.73	784.73	-1.09012	29.5423	157.495	166.485	46.3333	4.00003	4.00002	87.1261
2785	4	5	784.577	784.577	-1.0899	29.5423	157.519	166.716	46.4167	4.00003	4.00002	87.2351
2790	4	5	784.425	784.425	-1.08969	29.5423	157.543	166.948	46.5	4.00003	4.00002	87.344
2795	4	5	784.273	784.273	-1.08948	29.5423	157.567	167.179	46.5833	4.00003	4.00002	87.453
2800	4	5	784.121	784.121	-1.08927	29.5423	157.59	167.41	46.6667	4.00003	4.00002	87.5619
2805	4	5	783.97	783.97	-1.08906	29.5423	157.614	167.641	46.75	4.00003	4.00002	87.6708
2810	4	5	783.82	783.82	-1.08885	29.5423	157.638	167.872	46.8333	4.00003	4.00002	87.7796
2815	4	5	783.67	783.67	-1.08864	29.5423	157.661	168.103	46.9167	4.00003	4.00002	87.8885
2820	4	5	783.521	783.521	-1.08843	29.5423	157.684	168.334	47	4.00003	4.00002	87.9973
2825	4	5	783.372	783.372	-1.08822	29.5423	157.707	168.564	47.0833	4.00003	4.00002	88.1061
2830	4	5	783.223	783.223	-1.08802	29.5423	157.73	168.795	47.1667	4.00003	4.00002	88.2149
2835	4	5	783.075	783.075	-1.08781	29.5423	157.753	169.026	47.25	4.00003	4.00002	88.3236
2840	4	5	782.928	782.928	-1.08761	29.5423	157.776	169.256	47.3333	4.00003	4.00002	88.4324
2845	4	5	782.781	782.781	-1.0874	29.5423	157.799	169.486	47.4167	4.00003	4.00002	88.5411
2850	4	5	782.634	782.634	-1.0872	29.5423	157.821	169.717	47.5	4.00003	4.00002	88.6498
2855	4	5	782.488	782.488	-1.08699	29.5423	157.844	169.947	47.5833	4.00003	4.00002	88.7585
2860	4	5	782.343	782.343	-1.08679	29.5423	157.866	170.177	47.6667	4.00003	4.00002	88.8671
2865	4	5	782.197	782.197	-1.08659	29.5423	157.888	170.407	47.75	4.00003	4.00002	88.9758
2870	4	5	782.053	782.053	-1.08639	29.5423	157.91	170.637	47.8333	4.00003	4.00002	89.0844
2875	4	5	781.909	781.909	-1.08618	29.5423	157.932	170.867	47.9167	4.00003	4.00002	89.193
2880	4	5	781.765	781.765	-1.08598	29.5423	157.954	171.097	48	4.00003	4.00002	89.3016
2885	4	5	781.621	781.621	-1.08579	29.5423	157.976	171.326	48.0833	4.00003	4.00002	89.4101
2890	4	5	781.479	781.479	-1.08559	29.5423	157.997	171.556	48.1667	4.00003	4.00002	89.5187
2895	4	5	781.336	781.336	-1.08539	29.5423	158.019	171.785	48.25	4.00003	4.00002	89.6272
2900	4	5	781.194	781.194	-1.08519	29.5423	158.04	172.015	48.3333	4.00003	4.00002	89.7357
2905	4	5	781.053	781.053	-1.08499	29.5423	158.061	172.244	48.4167	4.00003	4.00002	89.8442
2910	4	5	780.912	780.912	-1.0848	29.5423	158.083	172.473	48.5	4.00003	4.00002	89.9526
2915	4	5	780.771	780.771	-1.0846	29.5423	158.104	172.702	48.5833	4.00003	4.00002	90.0611
2920	4	5	780.631	780.631	-1.08441	29.5423	158.125	172.932	48.6667	4.00003	4.00002	90.1695
2925	4	5	780.491	780.491	-1.08421	29.5423	158.145	173.161	48.75	4.00003	4.00002	90.2779
2930	4	5	780.352	780.352	-1.08402	29.5423	158.166	173.389	48.8333	4.00003	4.00002	90.3863
2935	4	5	780.213	780.213	-1.08382	29.5423	158.187	173.618	48.9167	4.00003	4.00002	90.4946
2940	4	5	780.075	780.075	-1.08363	29.5423	158.207	173.847	49	4.00003	4.00002	90.603
2945	4	5	779.937	779.937	-1.08344	29.5423	158.227	174.076	49.0833	4.00003	4.00002	90.7113
2950	4	5	779.799	779.799	-1.08325	29.5423	158.248	174.304	49.1667	4.00003	4.00002	90.8196
2955	4	5	779.662	779.662	-1.08306	29.5423	158.268	174.533	49.25	4.00003	4.00002	90.9279
2960	4	5	779.526	779.526	-1.08286	29.5423	158.288	174.761	49.3333	4.00003	4.00002	91.0362
2965	4	5	779.389	779.389	-1.08268	29.5423	158.308	174.989	49.4167	4.00003	4.00002	91.1444
2970	4	5	779.254	779.254	-1.08249	29.5423	158.328	175.218	49.5	4.00003	4.00002	91.2526
2975	4	5	779.118	779.118	-1.0823	29.5423	158.348	175.446	49.5833	4.00003	4.00002	91.3608
2980	4	5	778.983	778.983	-1.08211	29.5423	158.367	175.674	49.6667	4.00003	4.00002	91.469
2985	4	5	778.849	778.849	-1.08192	29.5423	158.387	175.902	49.75	4.00003	4.00002	91.5772
2990	4	5	778.714	778.714	-1.08173	29.5423	158.406	176.13	49.8333	4.00003	4.00002	91.6854
2995	4	5	778.581	778.581	-1.08155	29.5423	158.425	176.358	49.9167	4.00003	4.00002	91.7935
3000	4	5	778.447	778.447	-1.08136	29.5423	158.445	176.585	50	4.00003	4.00002	91.9016
3005	4	5	778.314	778.314	-1.08118	29.5423	158.464	176.813	50.0833	4.00003	4.00002	92.0097
3010	4	5	778.182	778.182	-1.08099	29.5423	158.483	177.04	50.1667	4.00003	4.00002	92.1178
3015	4	5	778.05	778.05	-1.08081	29.5423	158.502	177.268	50.25	4.00002	4.00002	92.2259
3020	4	5	777.918	777.918	-1.08062	29.5423	158.521	177.495	50.3333	4.00002	4.00002	92.3339
3025	4	5	777.786	777.786	-1.08044	29.5423	158.539	177.723	50.4167	4.00002	4.00002	92.4419
3030	4	5	777.656	777.656	-1.08026	29.5423	158.558	177.95	50.5	4.00002	4.00002	92.5499
3035	4	5	777.525	777.525	-1.08008	29.5423	158.576	178.177	50.5833	4.00002	4.00002	92.6579
3040	4	5	777.395	777.395	-1.0799	29.5423	158.595	178.404	50.6667	4.00002	4.00002	92.7659
3045	4	5	777.265	777.265	-1.07972	29.5423	158.613	178.631	50.75	4.00002	4.00002	92.8739
3050	4	5	777.136	777.136	-1.07954	29.5423	158.631	178.858	50.8333	4.00002	4.00002	92.9818
3055	4	5	777.007	777.007	-1.07936	29.5423	158.65	179.085	50.9167	4.00002	4.00002	93.0897
3060	4	5	776.878	776.878	-1.07918	29.5423	158.668	179.311	51	4.00002	4.00002	93.1976
3065	4	5	776.75	776.75	-1.079	29.5423	158.686	179.538	51.0833	4.00002	4.00002	93.3055
3070	4	5	776.622	776.622	-1.07882	29.5423	158.703	179.765	51.1667	4.00002	4.00002	93.4134
3075	4	5	776.494	776.494	-1.07864	29.5423	158.721	179.991	51.25	4.00002	4.00002	93.5212
3080	4	5	776.367	776.367	-1.07847	29.5423	158.739	180.217	51.3333	4.00002	4.00002	93.629
3085	4	5	776.241	776.241	-1.07829	29.5423	158.756	180.444	51.4167	4.00002	4.00002	93.7368
3090	4	5	776.114	776.114	-1.07811	29.5423	158.774	180.67	51.5	4.00002	4.00002	93.8446
3095	4	5	775.988	775.988	-1.07794	29.5423	158.791	180.896	51.5833	4.00002	4.00002	93.9524
3100	4	5	775.863	775.863	-1.07776	29.5423	158.809	181.122	51.6667	4.00002	4.00002	94.0602
3105	4	5	775.738	775.738	-1.07759	29.5423	158.826	181.348	51.75	4.00002	4.00002	94.1679
3110	4	5	775.613	775.613	-1.07741	29.5423	158.843	181.574	51.8333	4.00002	4.00002	94.2756
3115	4	5	775.488	775.488	-1.07724	29.5423	158.86	181.8	51.9167	4.00002	4.00002	94.3833
3120	4	5	775.364	775.364	-1.07707	29.5423	158.877	182.026	52	4.00002	4.00002	94.491
3125	4	5	775.24	775.24	-1.07689	29.5423	158.894	182.251	52.0833	4.00002	4.00002	94.5987
3130	4	5	775.117	775.117	-1.07672	29.5423	158.911	182.477	52.1667	4.00002	4.00002	94.7064
3135	4	5	774.994	774.994	-1.07655	29.5423	158.927	182.702	52.25	4.00002	4.00002	94.814
3140	4	5	774.871	774.871	-1.07638	29.5423	158.944	182.928	52.3333	4.00002	4.00002	94.9216
3145	4	5	774.749	774.749	-1.07621	29.5423	158.96	183.153	52.4167	4.00002	4.00002	95.0292
3150	4	5	774.627	774.627	-1.07604	29.5423	158.977	183.378	52.5	4.00002	4.00002	95.1368
3155	4	5	774.505	774.505	-1.07587	29.5423	158.993	183.603	52.5833	4.00002	4.00002	95.2444
3160	4	5	774.384	774.384	-1.0757	29.5423	159.009	183.828	52.6667	4.00002	4.00002	95.3519
3165	4	5	774.263	774.263	-1.07553	29.5423	159.025	184.053	52.75	4.00002	4.00002	95.4595
3170	4	5	774.142	774.142	-1.07537	29.5423	159.041	184.278	52.8333	4.00002	4.00002	95.567
3175	4	5	774.022	774.022	-1.0752	29.5423	159.057	184.503	52.9167	4.00002	4.00002	95.6745
3180	4	5	773.902	773.902	-1.07503	29.5423	159.073	184.728	53	4.00002	4.00002	95.782
3185	4	5	773.782	773.782	-1.07486	29.5423	159.089	184.952	53.0833	4.00002	4.00002	95.8894
3190	4	5	773.663	773.663	-1.0747	29.5423	159.105	185.177	53.1667	4.00002	4.00002	95.9969
3195	4	5	773.544	773.544	-1.07453	29.5423	159.12	185.401	53.25	4.00002	4.00002	96.1043
3200	4	5	773.425	773.425	-1.07437	29.5423	159.136	185.626	53.3333	4.00002	4.00002	96.2118
3205	4	5	773.307	773.307	-1.0742	29.5423	159.151	185.85	53.4167	4.00002	4.00002	96.3192
3210	4	5	773.189	773.189	-1.07404	29.5423	159.167	186.074	53.5	4.00002	4.00002	96.4265
3215	4	5	773.072	773.072	-1.07387	29.5423	159.182	186.298	53.5833	4.00002	4.00002	96.5339
3220	4	5	772.954	772.954	-1.07371	29.5423	159.197	186.522	53.6667	4.00002	4.00002	96.6413
3225	4	5	772.837	772.837	-1.07355	29.5423	159.213	186.746	53.75	4.00002	4.00002	96.7486
3230	4	5	772.721	772.721	-1.07339	29.5423	159.228	186.97	53.8333	4.00002	4.00002	96.8559
3235	4	5	772.604	772.604	-1.07322	29.5423	159.243	187.194	53.9167	4.00002	4.00002	96.9632
3240	4	5	772.489	772.489	-1.07306	29.5423	159.258	187.418	54	4.00002	4.00002	97.0705
3245	4	5	772.373	772.373	-1.0729	29.5423	159.272	187.641	54.0833	4.00002	4.00002	97.1778
3250	4	5	772.258	772.258	-1.07274	29.5423	159.287	187.865	54.1667	4.00002	4.00002	97.2851
3255	4	5	772.142	772.142	-1.07258	29.5423	159.302	188.088	54.25	4.00002	4.00002	97.3923
3260	4	5	772.028	772.028	-1.07242	29.5423	159.316	188.312	54.3333	4.00002	4.00002	97.4995
3265	4	5	771.913	771.913	-1.07226	29.5423	159.331	188.535	54.4167	4.00002	4.00002	97.6067
3270	4	5	771.799	771.799	-1.0721	29.5423	159.345	188.758	54.5	4.00002	4.00002	97.7139
3275	4	5	771.686	771.686	-1.07194	29.5423	159.36	188.981	54.5833	4.00002	4.00002	97.8211
3280	4	5	771.572	771.572	-1.07179	29.5423	159.374	189.204	54.6667	4.00002	4.00002	97.9283
3285	4	5	771.459	771.459	-1.07163	29.5423	159.388	189.427	54.75	4.00002	4.00002	98.0354
3290	4	5	771.346	771.346	-1.07147	29.5423	159.402	189.65	54.8333	4.00002	4.00002	98.1426
3295	4	5	771.234	771.234	-1.07131	29.5423	159.416	189.873	54.9167	4.00002	4.00002	98.2497
3300	4	5	771.121	771.121	-1.07116	29.5423	159.43	190.096	55	4.00002	4.00002	98.3568
3305	4	5	771.009	771.009	-1.071	29.5423	159.444	190.318	55.0833	4.00002	4.00002	98.4639
3310	4	5	770.898	770.898	-1.07085	29.5423	159.458	190.541	55.1667	4.00002	4.00002	98.5709
3315	4	5	770.786	770.786	-1.07069	29.5423	159.472	190.764	55.25	4.00002	4.00002	98.678
3320	4	5	770.675	770.675	-1.07054	29.5423	159.486	190.986	55.3333	4.00002	4.00002	98.785
3325	4	5	770.565	770.565	-1.07038	29.5423	159.499	191.208	55.4167	4.00002	4.00002	98.892
3330	4	5	770.454	770.454	-1.07023	29.5423	159.513	191.43	55.5	4.00002	4.00002	98.999
3335	4	5	770.344	770.344	-1.07008	29.5423	159.526	191.653	55.5833	4.00002	4.00002	99.106
3340	4	5	770.234	770.234	-1.06992	29.5423	159.54	191.875	55.6667	4.00002	4.00002	99.213
3345	4	5	770.124	770.124	-1.06977	29.5423	159.553	192.097	55.75	4.00002	4.00002	99.32
3350	4	5	770.015	770.015	-1.06962	29.5423	159.566	192.319	55.8333	4.00002	4.00002	99.4269
3355	4	5	769.906	769.906	-1.06947	29.5423	159.58	192.54	55.9167	4.00002	4.00002	99.5339
3360	4	5	769.797	769.797	-1.06931	29.5423	159.593	192.762	56	4.00002	4.00002	99.6408
3365	4	5	769.689	769.689	-1.06916	29.5423	159.606	192.984	56.0833	4.00002	4.00002	99.7477
3370	4	5	769.581	769.581	-1.06901	29.5423	159.619	193.205	56.1667	4.00002	4.00002	99.8546
3375	4	5	769.473	769.473	-1.06886	29.5423	159.632	193.427	56.25	4.00002	4.00002	99.9614
3380	4	5	769.365	769.365	-1.06871	29.5423	159.645	193.648	56.3333	4.00002	4.00002	100.068
3385	4	5	769.258	769.258	-1.06856	29.5423	159.657	193.87	56.4167	4.00002	4.00002	100.175
3390	4	5	769.151	769.151	-1.06841	29.5423	159.67	194.091	56.5	4.00002	4.00002	100.282
3395	4	5	769.044	769.044	-1.06827	29.5423	159.683	194.312	56.5833	4.00002	4.00002	100.389
3400	4	5	768.938	768.938	-1.06812	29.5423	159.695	194.533	56.6667	4.00002	4.00002	100.496
3405	4	5	768.832	768.832	-1.06797	29.5423	159.708	194.754	56.75	4.00002	4.00002	100.602
3410	4	5	768.726	768.726	-1.06782	29.5423	159.72	194.975	56.8333	4.00002	4.00002	100.709
3415	4	5	768.62	768.62	-1.06767	29.5422	159.733	195.196	56.9167	4.00002	4.00002	100.816
3420	4	5	768.515	768.515	-1.06753	29.5422	159.745	195.417	57	4.00002	4.00002	100.923
3425	4	5	768.409	768.409	-1.06738	29.5422	159.757	195.637	57.0833	4.00002	4.00002	101.029
3430	4	5	768.305	768.305	-1.06724	29.5422	159.77	195.858	57.1667	4.00002	4.00002	101.136
3435	4	5	768.2	768.2	-1.06709	29.5422	159.782	196.078	57.25	4.00002	4.00002	101.243
3440	4	5	768.096	768.096	-1.06694	29.5422	159.794	196.299	57.3333	4.00002	4.00002	101.349
3445	4	5	767.992	767.992	-1.0668	29.5422	159.806	196.519	57.4167	4.00002	4.00002	101.456
3450	4	5	767.888	767.888	-1.06666	29.5422	159.818	196.739	57.5	4.00002	4.00002	101.563
3455	4	5	767.784	767.784	-1.06651	29.5422	159.83	196.96	57.5833	4.00002	4.00002	101.669
3460	4	5	767.681	767.681	-1.06637	29.5422	159.841	197.18	57.6667	4.00002	4.00002	101.776
3465	4	5	767.578	767.578	-1.06622	29.5422	159.853	197.4	57.75	4.00002	4.00002	101.883
3470	4	5	767.475	767.475	-1.06608	29.5422	159.865	197.62	57.8333	4.00002	4.00002	101.989
3475	4	5	767.372	767.372	-1.06594	29.5422	159.876	197.84	57.9167	4.00002	4.00002	102.096
3480	4	5	767.27	767.27	-1.0658	29.5422	159.888	198.059	58	4.00002	4.00002	102.202
3485	4	5	767.168	767.168	-1.06565	29.5422	159.9	198.279	58.0833	4.00002	4.00002	102.309
3490	4	5	767.066	767.066	-1.06551	29.5422	159.911	198.499	58.1667	4.00002	4.00002	102.415
3495	4	5	766.965	766.965	-1.06537	29.5422	159.922	198.718	58.25	4.00002	4.00002	102.522
3500	4	5	766.864	766.864	-1.06523	29.5422	159.934	198.938	58.3333	4.00002	4.00002	102.628
3505	4	5	766.763	766.763	-1.06509	29.5422	159.945	199.157	58.4167	4.00002	4.00002	102.735
3510	4	5	766.662	766.662	-1.06495	29.5422	159.956	199.376	58.5	4.00002	4.00002	102.841
3515	4	5	766.561	766.561	-1.06481	29.5422	159.967	199.596	58.5833	4.00002	4.00002	102.948
3520	4	5	766.461	766.461	-1.06467	29.5422	159.978	199.815	58.6667	4.00002	4.00002	103.054
3525	4	5	766.361	766.361	-1.06453	29.5422	159.989	200.034	58.75	4.00002	4.00002	103.161
3530	4	5	766.261	766.261	-1.06439	29.5422	160	200.253	58.8333	4.00002	4.00002	103.267
3535	4	5	766.162	766.162	-1.06425	29.5422	160.011	200.472	58.9167	4.00002	4.00002	103.374
3540	4	5	766.062	766.062	-1.06411	29.5422	160.022	200.69	59	4.00002	4.00002	103.48
3545	4	5	765.963	765.963	-1.06398	29.5422	160.033	200.909	59.0833	4.00002	4.00002	103.586
3550	4	5	765.864	765.864	-1.06384	29.5422	160.044	201.128	59.1667	4.00002	4.00002	103.693
3555	4	5	765.766	765.766	-1.0637	29.5422	160.054	201.346	59.25	4.00002	4.00002	103.799
3560	4	5	765.667	765.667	-1.06356	29.5422	160.065	201.565	59.3333	4.00002	4.00002	103.905
3565	4	5	765.569	765.569	-1.06343	29.5422	160.076	201.783	59.4167	4.00002	4.00002	104.012
3570	4	5	765.471	765.471	-1.06329	29.5422	160.086	202.001	59.5	4.00002	4.00002	104.118
3575	4	5	765.374	765.374	-1.06315	29.5422	160.097	202.22	59.5833	4.00002	4.00002	104.224
3580	4	5	765.276	765.276	-1.06302	29.5422	160.107	202.438	59.6667	4.00002	4.00002	104.331
3585	4	5	765.179	765.179	-1.06288	29.5422	160.117	202.656	59.75	4.00002	4.00002	104.437
3590	4	5	765.082	765.082	-1.06275	29.5422	160.128	202.874	59.8333	4.00002	4.00002	104.543
3595	4	5	764.985	764.985	-1.06261	29.5422	160.138	203.092	59.9167	4.00002	4.00002	104.649
3600	4	10	764.744	764.744	-2.12469	29.5425	160.158	203.528	60	4.00005	4.00002	104.862
3610	4	10	764.529	764.529	-2.12419	29.5426	160.178	203.963	60.1667	4.00007	4.00002	105.074
3620	4	10	764.335	764.335	-2.12367	29.5426	160.198	204.398	60.3333	4.00007	4.00002	105.287
3630	4	10	764.142	764.142	-2.12314	29.5426	160.218	204.833	60.5	4.00007	4.00002	105.499
3640	4	10	763.953	763.953	-2.12262	29.5426	160.238	205.267	60.6667	4.00007	4.00002	105.711
3650	4	10	763.764	763.764	-2.12209	29.5426	160.257	205.701	60.8333	4.00007	4.00003	105.923
3660	4	10	763.576	763.576	-2.12157	29.5426	160.276	206.135	61	4.00007	4.00003	106.135
3670	4	10	763.39	763.39	-2.12105	29.5426	160.295	206.568	61.1667	4.00007	4.00003	106.347
3680	4	10	763.204	763.204	-2.12053	29.5426	160.314	207.001	61.3333	4.00007	4.00003	106.559
3690	4	10	763.019	763.019	-2.12001	29.5426	160.332	207.434	61.5	4.00007	4.00003	106.771
3700	4	10	762.834	762.834	-2.1195	29.5426	160.351	207.867	61.6667	4.00007	4.00003	106.983
3710	4	10	762.651	762.651	-2.11899	29.5426	160.369	208.299	61.8333	4.00007	4.00003	107.195
3720	4	10	762.468	762.468	-2.11848	29.5426	160.387	208.731	62	4.00007	4.00003	107.407
3730	4	10	762.287	762.287	-2.11797	29.5426	160.405	209.162	62.1667	4.00007	4.00003	107.619
3740	4	10	762.106	762.106	-2.11747	29.5426	160.422	209.593	62.3333	4.00007	4.00003	107.83
3750	4	10	761.925	761.925	-2.11696	29.5426	160.44	210.024	62.5	4.00007	4.00003	108.042
3760	4	10	761.746	761.746	-2.11646	29.5426	160.457	210.455	62.6667	4.00007	4.00003	108.254
3770	4	10	761.567	761.567	-2.11596	29.5426	160.474	210.885	62.8333	4.00007	4.00004	108.465
3780	4	10	761.389	761.389	-2.11547	29.5426	160.491	211.315	63	4.00007	4.00004	108.677
3790	4	10	761.212	761.212	-2.11497	29.5426	160.507	211.744	63.1667	4.00007	4.00004	108.888
3800	4	10	761.036	761.036	-2.11448	29.5426	160.524	212.174	63.3333	4.00007	4.00004	109.099
3810	4	10	760.86	760.86	-2.11399	29.5426	160.54	212.603	63.5	4.00007	4.00004	109.311
3820	4	10	760.685	760.685	-2.1135	29.5426	160.556	213.031	63.6667	4.00007	4.00004	109.522
3830	4	10	760.511	760.511	-2.11302	29.5426	160.572	213.46	63.8333	4.00007	4.00004	109.733
3840	4	10	760.338	760.338	-2.11253	29.5426	160.588	213.888	64	4.00007	4.00004	109.945
3850	4	10	760.165	760.165	-2.11205	29.5426	160.604	214.315	64.1667	4.00007	4.00004	110.156
3860	4	10	759.993	759.993	-2.11157	29.5426	160.619	214.743	64.3333	4.00006	4.00004	110.367
3870	4	10	759.821	759.821	-2.11109	29.5426	160.635	215.17	64.5	4.00006	4.00004	110.578
3880	4	10	759.651	759.651	-2.11062	29.5426	160.65	215.596	64.6667	4.00006	4.00004	110.789
3890	4	10	759.481	759.481	-2.11014	29.5426	160.665	216.023	64.8333	4.00006	4.00004	111
3900	4	10	759.311	759.311	-2.10967	29.5426	160.68	216.449	65	4.00006	4.00004	111.211
3910	4	10	759.143	759.143	-2.1092	29.5426	160.694	216.875	65.1667	4.00006	4.00004	111.422
3920	4	10	758.975	758.975	-2.10873	29.5426	160.709	217.3	65.3333	4.00006	4.00004	111.632
3930	4	10	758.808	758.808	-2.10827	29.5426	160.723	217.725	65.5	4.00006	4.00004	111.843
3940	4	10	758.641	758.641	-2.1078	29.5426	160.737	218.15	65.6667	4.00006	4.00004	112.054
3950	4	10	758.475	758.475	-2.10734	29.5426	160.751	218.575	65.8333	4.00006	4.00004	112.265
3960	4	10	758.31	758.31	-2.10688	29.5426	160.765	218.999	66	4.00006	4.00005	112.475
3970	4	10	758.145	758.145	-2.10642	29.5426	160.779	219.423	66.1667	4.00006	4.00005	112.686
3980	4	10	757.981	757.981	-2.10596	29.5426	160.793	219.846	66.3333	4.00006	4.00005	112.896
3990	4	10	757.817	757.817	-2.1055	29.5426	160.806	220.27	66.5	4.00006	4.00005	113.107
4000	4	10	757.655	757.655	-2.10505	29.5426	160.82	220.693	66.6667	4.00006	4.00005	113.317
4010	4	10	757.492	757.492	-2.1046	29.5426	160.833	221.115	66.8333	4.00006	4.00005	113.528
4020	4	10	757.331	757.331	-2.10415	29.5426	160.846	221.538	67	4.00006	4.00005	113.738
4030	4	10	757.17	757.17	-2.1037	29.5426	160.859	221.96	67.1667	4.00006	4.00005	113.949
4040	4	10	757.009	757.009	-2.10325	29.5425	160.871	222.381	67.3333	4.00006	4.00005	114.159
4050	4	10	756.849	756.849	-2.10281	29.5425	160.884	222.803	67.5	4.00006	4.00005	114.369
4060	4	10	756.69	756.69	-2.10236	29.5425	160.897	223.224	67.6667	4.00006	4.00005	114.579
4070	4	10	756.532	756.532	-2.10192	29.5425	160.909	223.645	67.8333	4.00006	4.00005	114.789
4080	4	10	756.373	756.373	-2.10148	29.5425	160.921	224.065	68	4.00006	4.00005	115
4090	4	10	756.216	756.216	-2.10104	29.5425	160.933	224.485	68.1667	4.00006	4.00005	115.21
4100	4	10	756.059	756.059	-2.1006	29.5425	160.945	224.905	68.3333	4.00006	4.00005	115.42
4110	4	10	755.903	755.903	-2.10017	29.5425	160.957	225.325	68.5	4.00006	4.00005	115.63
4120	4	10	755.747	755.747	-2.09973	29.5425	160.969	225.744	68.6667	4.00006	4.00005	115.839
4130	4	10	755.591	755.591	-2.0993	29.5425	160.981	226.163	68.8333	4.00006	4.00005	116.049
4140	4	10	755.437	755.437	-2.09887	29.5425	160.992	226.581	69	4.00006	4.00005	116.259
4150	4	10	755.283	755.283	-2.09844	29.5425	161.004	227	69.1667	4.00006	4.00005	116.469
4160	4	10	755.129	755.129	-2.09801	29.5425	161.015	227.418	69.3333	4.00006	4.00005	116.679
4170	4	10	754.976	754.976	-2.09758	29.5425	161.026	227.835	69.5	4.00006	4.00005	116.889
4180	4	10	754.823	754.823	-2.09716	29.5425	161.037	228.253	69.6667	4.00006	4.00005	117.098
4190	4	10	754.671	754.671	-2.09673	29.5425	161.048	228.67	69.8333	4.00006	4.00005	117.308
4200	4	10	754.519	754.519	-2.09631	29.5425	161.059	229.087	70	4.00006	4.00005	117.517
4210	4	10	754.368	754.368	-2.09589	29.5425	161.069	229.503	70.1667	4.00006	4.00005	117.727
4220	4	10	754.218	754.218	-2.09547	29.5425	161.08	229.919	70.3333	4.00006	4.00005	117.936
4230	4	10	754.068	754.068	-2.09505	29.5425	161.09	230.335	70.5	4.00006	4.00005	118.146
4240	4	10	753.918	753.918	-2.09463	29.5425	161.101	230.75	70.6667	4.00006	4.00005	118.355
4250	4	10	753.769	753.769	-2.09422	29.5425	161.111	231.166	70.8333	4.00006	4.00005	118.565
4260	4	10	753.621	753.621	-2.0938	29.5425	161.121	231.581	71	4.00006	4.00005	118.774
4270	4	10	753.473	753.473	-2.09339	29.5425	161.131	231.995	71.1667	4.00006	4.00005	118.983
4280	4	10	753.325	753.325	-2.09298	29.5425	161.141	232.409	71.3333	4.00006	4.00005	119.193
4290	4	10	753.178	753.178	-2.09257	29.5425	161.151	232.823	71.5	4.00006	4.00005	119.402
4300	4	10	753.031	753.031	-2.09216	29.5425	161.16	233.237	71.6667	4.00006	4.00005	119.611
4310	4	10	752.885	752.885	-2.09175	29.5425	161.17	233.65	71.8333	4.00006	4.00005	119.82
4320	4	10	752.739	752.739	-2.09135	29.5425	161.18	234.063	72	4.00005	4.00005	120.029
4330	4	10	752.594	752.594	-2.09094	29.5425	161.189	234.476	72.1667	4.00005	4.00005	120.238
4340	4	10	752.449	752.449	-2.09054	29.5425	161.198	234.889	72.3333	4.00005	4.00005	120.447
4350	4	10	752.305	752.305	-2.09014	29.5425	161.207	235.301	72.5	4.00005	4.00005	120.656
4360	4	10	752.161	752.161	-2.08974	29.5425	161.216	235.713	72.6667	4.00005	4.00005	120.865
4370	4	10	752.017	752.017	-2.08934	29.5425	161.226	236.124	72.8333	4.00005	4.00005	121.074
4380	4	10	751.874	751.874	-2.08894	29.5425	161.234	236.535	73	4.00005	4.00005	121.283
4390	4	10	751.732	751.732	-2.08854	29.5425	161.243	236.946	73.1667	4.00005	4.00005	121.492
4400	4	10	751.59	751.59	-2.08814	29.5425	161.252	237.357	73.3333	4.00005	4.00005	121.701
4410	4	10	751.448	751.448	-2.08775	29.5425	161.261	237.767	73.5	4.00005	4.00005	121.909
4420	4	10	751.306	751.306	-2.08736	29.5425	161.269	238.177	73.6667	4.00005	4.00005	122.118
4430	4	10	751.166	751.166	-2.08696	29.5425	161.278	238.587	73.8333	4.00005	4.00005	122.327
4440	4	10	751.025	751.025	-2.08657	29.5425	161.286	238.996	74	4.00005	4.00005	122.535
4450	4	10	750.885	750.885	-2.08618	29.5425	161.294	239.406	74.1667	4.00005	4.00005	122.744
4460	4	10	750.745	750.745	-2.08579	29.5425	161.302	239.814	74.3333	4.00005	4.00005	122.952
4470	4	10	750.606	750.606	-2.0854	29.5425	161.31	240.223	74.5	4.00005	4.00005	123.161
4480	4	10	750.467	750.467	-2.08502	29.5425	161.318	240.631	74.6667	4.00005	4.00005	123.369
4490	4	10	750.329	750.329	-2.08463	29.5425	161.326	241.039	74.8333	4.00005	4.00005	123.578
4500	4	10	750.191	750.191	-2.08425	29.5425	161.334	241.447	75	4.00005	4.00005	123.786
4510	4	10	750.053	750.053	-2.08386	29.5425	161.342	241.854	75.1667	4.00005	4.00005	123.994
4520	4	10	749.916	749.916	-2.08348	29.5425	161.35	242.261	75.3333	4.00005	4.00005	124.203
4530	4	10	749.779	749.779	-2.0831	29.5425	161.357	242.667	75.5	4.00005	4.00005	124.411
4540	4	10	749.642	749.642	-2.08272	29.5425	161.365	243.074	75.6667	4.00005	4.00005	124.619
4550	4	10	749.506	749.506	-2.08234	29.5425	161.372	243.48	75.8333	4.00005	4.00005	124.827
4560	4	10	749.371	749.371	-2.08196	29.5425	161.38	243.886	76	4.00005	4.00005	125.036
4570	4	10	749.235	749.235	-2.08159	29.5425	161.387	244.291	76.1667	4.00005	4.00005	125.244
4580	4	10	749.1	749.1	-2.08121	29.5425	161.394	244.696	76.3333	4.00005	4.00005	125.452
4590	4	10	748.966	748.966	-2.08083	29.5425	161.401	245.101	76.5	4.00005	4.00005	125.66
4600	4	10	748.831	748.831	-2.08046	29.5425	161.408	245.506	76.6667	4.00005	4.00005	125.868
4610	4	10	748.697	748.697	-2.08009	29.5425	161.415	245.91	76.8333	4.00005	4.00005	126.076
4620	4	10	748.564	748.564	-2.07972	29.5425	161.422	246.314	77	4.00005	4.00005	126.284
4630	4	10	748.431	748.431	-2.07934	29.5425	161.429	246.718	77.1667	4.00005	4.00005	126.492
4640	4	10	748.298	748.298	-2.07897	29.5425	161.436	247.121	77.3333	4.00005	4.00005	126.7
4650	4	10	748.165	748.165	-2.07861	29.5425	161.442	247.524	77.5	4.00005	4.00005	126.907
4660	4	10	748.033	748.033	-2.07824	29.5425	161.449	247.927	77.6667	4.00005	4.00005	127.115
4670	4	10	747.901	747.901	-2.07787	29.5425	161.456	248.33	77.8333	4.00005	4.00005	127.323
4680	4	10	747.77	747.77	-2.0775	29.5425	161.462	248.732	78	4.00005	4.00005	127.531
4690	4	10	747.639	747.639	-2.07714	29.5425	161.469	249.134	78.1667	4.00005	4.00005	127.738
4700	4	10	747.508	747.508	-2.07677	29.5425	161.475	249.535	78.3333	4.00005	4.00005	127.946
4710	4	10	747.377	747.377	-2.07641	29.5425	161.481	249.937	78.5	4.00005	4.00005	128.154
4720	4	10	747.247	747.247	-2.07605	29.5425	161.487	250.338	78.6667	4.00005	4.00005	128.361
4730	4	10	747.117	747.117	-2.07569	29.5425	161.493	250.738	78.8333	4.00005	4.00005	128.569
4740	4	10	746.988	746.988	-2.07533	29.5425	161.5	251.139	79	4.00005	4.00005	128.776
4750	4	10	746.859	746.859	-2.07497	29.5425	161.506	251.539	79.1667	4.00005	4.00005	128.984
4760	4	10	746.73	746.73	-2.07461	29.5425	161.512	251.939	79.3333	4.00005	4.00005	129.191
4770	4	10	746.601	746.601	-2.07425	29.5425	161.517	252.338	79.5	4.00005	4.00005	129.398
4780	4	10	746.473	746.473	-2.07389	29.5425	161.523	252.737	79.6667	4.00005	4.00005	129.606
4790	4	10	746.345	746.345	-2.07354	29.5425	161.529	253.136	79.8333	4.00005	4.00005	129.813
4800	4	10	746.218	746.218	-2.07318	29.5425	161.535	253.535	80	4.00005	4.00005	130.02
4810	4	10	746.09	746.09	-2.07283	29.5425	161.54	253.933	80.1667	4.00005	4.00005	130.228
4820	4	10	745.963	745.963	-2.07247	29.5425	161.546	254.331	80.3333	4.00005	4.00005	130.435
4830	4	10	745.837	745.837	-2.07212	29.5425	161.551	254.729	80.5	4.00005	4.00005	130.642
4840	4	10	745.71	745.71	-2.07177	29.5425	161.557	255.127	80.6667	4.00005	4.00005	130.849
4850	4	10	745.584	745.584	-2.07142	29.5425	161.562	255.524	80.8333	4.00005	4.00005	131.056
4860	4	10	745.458	745.458	-2.07107	29.5425	161.568	255.921	81	4.00005	4.00005	131.263
4870	4	10	745.333	745.333	-2.07072	29.5425	161.573	256.317	81.1667	4.00005	4.00005	131.47
4880	4	10	745.207	745.207	-2.07037	29.5425	161.578	256.713	81.3333	4.00005	4.00005	131.677
4890	4	10	745.082	745.082	-2.07002	29.5425	161.583	257.109	81.5	4.00005	4.00005	131.884
4900	4	10	744.958	744.958	-2.06967	29.5424	161.589	257.505	81.6667	4.00005	4.00005	132.091
4910	4	10	744.833	744.833	-2.06933	29.5424	161.594	257.901	81.8333	4.00005	4.00005	132.298
4920	4	10	744.709	744.709	-2.06898	29.5424	161.599	258.296	82	4.00005	4.00005	132.505
4930	4	10	744.585	744.585	-2.06864	29.5424	161.604	258.69	82.1667	4.00005	4.00005	132.712
4940	4	10	744.462	744.462	-2.06829	29.5424	161.609	259.085	82.3333	4.00005	4.00005	132.919
4950	4	10	744.339	744.339	-2.06795	29.5424	161.613	259.479	82.5	4.00005	4.00005	133.125
4960	4	10	744.216	744.216	-2.06761	29.5424	161.618	259.873	82.6667	4.00005	4.00005	133.332
4970	4	10	744.093	744.093	-2.06727	29.5424	161.623	260.267	82.8333	4.00005	4.00005	133.539
4980	4	10	743.97	743.97	-2.06693	29.5424	161.628	260.66	83	4.00005	4.00005	133.746
4990	4	10	743.848	743.848	-2.06659	29.5424	161.632	261.053	83.1667	4.00005	4.00005	133.952
5000	4	10	743.726	743.726	-2.06625	29.5424	161.637	261.446	83.3333	4.00005	4.00005	134.159
5010	4	10	743.605	743.605	-2.06591	29.5424	161.641	261.839	83.5	4.00005	4.00005	134.365
5020	4	10	743.483	743.483	-2.06557	29.5424	161.646	262.231	83.6667	4.00005	4.00005	134.572
5030	4	10	743.362	743.362	-2.06523	29.5424	161.65	262.623	83.8333	4.00005	4.00005	134.778
5040	4	10	743.241	743.241	-2.0649	29.5424	161.655	263.014	84	4.00005	4.00005	134.985
5050	4	10	743.12	743.12	-2.06456	29.5424	161.659	263.406	84.1667	4.00005	4.00005	135.191
5060	4	10	743	743	-2.06422	29.5424	161.664	263.797	84.3333	4.00005	4.00005	135.398
5070	4	10	742.88	742.88	-2.06389	29.5424	161.668	264.187	84.5	4.00005	4.00005	135.604
5080	4	10	742.76	742.76	-2.06356	29.5424	161.672	264.578	84.6667	4.00005	4.00005	135.81
5090	4	10	742.64	742.64	-2.06322	29.5424	161.676	264.968	84.8333	4.00005	4.00005	136.017
5100	4	10	742.521	742.521	-2.06289	29.5424	161.68	265.358	85	4.00005	4.00005	136.223
5110	4	10	742.402	742.402	-2.06256	29.5424	161.685	265.747	85.1667	4.00004	4.00005	136.429
5120	4	10	742.283	742.283	-2.06223	29.5424	161.689	266.137	85.3333	4.00004	4.00005	136.635
5130	4	10	742.164	742.164	-2.0619	29.5424	161.693	266.526	85.5	4.00004	4.00005	136.841
5140	4	10	742.046	742.046	-2.06157	29.5424	161.697	266.915	85.6667	4.00004	4.00005	137.047
5150	4	10	741.927	741.927	-2.06124	29.5424	161.701	267.303	85.8333	4.00004	4.00005	137.254
5160	4	10	741.809	741.809	-2.06091	29.5424	161.704	267.691	86	4.00004	4.00005	137.46
5170	4	10	741.692	741.692	-2.06058	29.5424	161.708	268.079	86.1667	4.00004	4.00005	137.666
5180	4	10	741.574	741.574	-2.06026	29.5424	161.712	268.467	86.3333	4.00004	4.00005	137.872
5190	4	10	741.457	741.457	-2.05993	29.5424	161.716	268.854	86.5	4.00004	4.00005	138.078
5200	4	10	741.34	741.34	-2.0596	29.5424	161.72	269.241	86.6667	4.00004	4.00005	138.284
5210	4	10	741.223	741.223	-2.05928	29.5424	161.723	269.628	86.8333	4.00004	4.00005	138.489
5220	4	10	741.106	741.106	-2.05895	29.5424	161.727	270.014	87	4.00004	4.00005	138.695
5230	4	10	740.99	740.99	-2.05863	29.5424	161.731	270.4	87.1667	4.00004	4.00005	138.901
5240	4	10	740.874	740.874	-2.05831	29.5424	161.734	270.786	87.3333	4.00004	4.00005	139.107
5250	4	10	740.758	740.758	-2.05798	29.5424	161.738	271.172	87.5	4.00004	4.00005	139.313
5260	4	10	740.642	740.642	-2.05766	29.5424	161.741	271.557	87.6667	4.00004	4.00005	139.518
5270	4	10	740.526	740.526	-2.05734	29.5424	161.745	271.942	87.8333	4.00004	4.00005	139.724
5280	4	10	740.411	740.411	-2.05702	29.5424	161.748	272.327	88	4.00004	4.00005	139.93
5290	4	10	740.296	740.296	-2.0567	29.5424	161.751	272.711	88.1667	4.00004	4.00005	140.135
5300	4	10	740.181	740.181	-2.05638	29.5424	161.755	273.095	88.3333	4.00004	4.00005	140.341
5310	4	10	740.066	740.066	-2.05606	29.5424	161.758	273.479	88.5	4.00004	4.00005	140.547
5320	4	10	739.952	739.952	-2.05574	29.5424	161.761	273.863	88.6667	4.00004	4.00005	140.752
5330	4	10	739.837	739.837	-2.05542	29.5424	161.765	274.246	88.8333	4.00004	4.00005	140.958
5340	4	10	739.723	739.723	-2.0551	29.5424	161.768	274.629	89	4.00004	4.00005	141.163
5350	4	10	739.61	739.61	-2.05479	29.5424	161.771	275.012	89.1667	4.00004	4.00005	141.369
5360	4	10	739.496	739.496	-2.05447	29.5424	161.774	275.394	89.3333	4.00004	4.00005	141.574
5370	4	10	739.382	739.382	-2.05416	29.5424	161.777	275.776	89.5	4.00004	4.00005	141.779
5380	4	10	739.269	739.269	-2.05384	29.5424	161.78	276.158	89.6667	4.00004	4.00005	141.985
5390	4	10	739.156	739.156	-2.05353	29.5424	161.783	276.54	89.8333	4.00004	4.00005	142.19
5400	4	10	739.043	739.043	-2.05321	29.5424	161.786	276.921	90	4.00004	4.00005	142.395
5410	4	10	738.93	738.93	-2.0529	29.5424	161.789	277.302	90.1667	4.00004	4.00005	142.601
5420	4	10	738.818	738.818	-2.05259	29.5424	161.792	277.683	90.3333	4.00004	4.00005	142.806
5430	4	10	738.706	738.706	-2.05227	29.5424	161.795	278.063	90.5	4.00004	4.00005	143.011
5440	4	10	738.594	738.594	-2.05196	29.5424	161.798	278.444	90.6667	4.00004	4.00005	143.216
5450	4	10	738.482	738.482	-2.05165	29.5424	161.801	278.823	90.8333	4.00004	4.00005	143.421
5460	4	10	738.37	738.37	-2.05134	29.5424	161.804	279.203	91	4.00004	4.00005	143.626
5470	4	10	738.258	738.258	-2.05103	29.5424	161.807	279.582	91.1667	4.00004	4.00005	143.832
5480	4	10	738.147	738.147	-2.05072	29.5424	161.809	279.961	91.3333	4.00004	4.00005	144.037
5490	4	10	738.036	738.036	-2.05041	29.5424	161.812	280.34	91.5	4.00004	4.00005	144.242
5500	4	10	737.925	737.925	-2.0501	29.5424	161.815	280.719	91.6667	4.00004	4.00005	144.447
5510	4	10	737.814	737.814	-2.04979	29.5424	161.818	281.097	91.8333	4.00004	4.00005	144.651
5520	4	10	737.703	737.703	-2.04948	29.5424	161.82	281.475	92	4.00004	4.00005	144.856
5530	4	10	737.593	737.593	-2.04918	29.5424	161.823	281.853	92.1667	4.00004	4.00005	145.061
5540	4	10	737.483	737.483	-2.04887	29.5424	161.825	282.23	92.3333	4.00004	4.00005	145.266
5550	4	10	737.373	737.373	-2.04856	29.5424	161.828	282.607	92.5	4.00004	4.00005	145.471
5560	4	10	737.263	737.263	-2.04826	29.5424	161.831	282.984	92.6667	4.00004	4.00005	145.676
5570	4	10	737.153	737.153	-2.04795	29.5424	161.833	283.36	92.8333	4.00004	4.00005	145.881
5580	4	10	737.043	737.043	-2.04765	29.5424	161.836	283.737	93	4.00004	4.00005	146.085
5590	4	10	736.934	736.934	-2.04734	29.5424	161.838	284.113	93.1667	4.00004	4.00004	146.29
5600	4	10	736.825	736.825	-2.04704	29.5424	161.84	284.488	93.3333	4.00004	4.00004	146.495
5610	4	10	736.716	736.716	-2.04674	29.5424	161.843	284.864	93.5	4.00004	4.00004	146.699
5620	4	10	736.607	736.607	-2.04643	29.5424	161.845	285.239	93.6667	4.00004	4.00004	146.904
5630	4	10	736.498	736.498	-2.04613	29.5424	161.848	285.614	93.8333	4.00004	4.00004	147.108
5640	4	10	736.39	736.39	-2.04583	29.5424	161.85	285.989	94	4.00004	4.00004	147.313
5650	4	10	736.281	736.281	-2.04553	29.5424	161.852	286.363	94.1667	4.00004	4.00004	147.518
5660	4	10	736.173	736.173	-2.04523	29.5424	161.855	286.737	94.3333	4.00004	4.00004	147.722
5670	4	10	736.065	736.065	-2.04493	29.5424	161.857	287.111	94.5	4.00004	4.00004	147.927
5680	4	10	735.957	735.957	-2.04463	29.5424	161.859	287.484	94.6667	4.00004	4.00004	148.131
5690	4	10	735.849	735.849	-2.04433	29.5424	161.861	287.857	94.8333	4.00004	4.00004	148.335
5700	4	10	735.742	735.742	-2.04403	29.5424	161.863	288.23	95	4.00004	4.00004	148.54
5710	4	10	735.635	735.635	-2.04373	29.5424	161.866	288.603	95.1667	4.00004	4.00004	148.744
5720	4	10	735.527	735.527	-2.04343	29.5424	161.868	288.975	95.3333	4.00004	4.00004	148.948
5730	4	10	735.42	735.42	-2.04313	29.5424	161.87	289.347	95.5	4.00004	4.00004	149.153
5740	4	10	735.313	735.313	-2.04283	29.5424	161.872	289.719	95.6667	4.00004	4.00004	149.357
5750	4	10	735.207	735.207	-2.04254	29.5424	161.874	290.091	95.8333	4.00004	4.00004	149.561
5760	4	10	735.1	735.1	-2.04224	29.5424	161.876	290.462	96	4.00004	4.00004	149.765
5770	4	10	734.994	734.994	-2.04194	29.5424	161.878	290.833	96.1667	4.00004	4.00004	149.97
5780	4	10	734.887	734.887	-2.04165	29.5424	161.88	291.204	96.3333	4.00004	4.00004	150.174
5790	4	10	734.781	734.781	-2.04135	29.5424	161.882	291.574	96.5	4.00004	4.00004	150.378
5800	4	10	734.675	734.675	-2.04106	29.5424	161.884	291.945	96.6667	4.00004	4.00004	150.582
5810	4	10	734.569	734.569	-2.04076	29.5424	161.886	292.314	96.8333	4.00004	4.00004	150.786
5820	4	10	734.464	734.464	-2.04047	29.5424	161.888	292.684	97	4.00004	4.00004	150.99
5830	4	10	734.358	734.358	-2.04018	29.5424	161.89	293.053	97.1667	4.00004	4.00004	151.194
5840	4	10	734.253	734.253	-2.03988	29.5424	161.892	293.423	97.3333	4.00004	4.00004	151.398
5850	4	10	734.147	734.147	-2.03959	29.5424	161.894	293.791	97.5	4.00004	4.00004	151.602
5860	4	10	734.042	734.042	-2.0393	29.5424	161.896	294.16	97.6667	4.00004	4.00004	151.806
5870	4	10	733.937	733.937	-2.03901	29.5424	161.897	294.528	97.8333	4.00004	4.00004	152.01
5880	4	10	733.833	733.833	-2.03872	29.5424	161.899	294.896	98	4.00004	4.00004	152.213
5890	4	10	733.728	733.728	-2.03842	29.5424	161.901	295.264	98.1667	4.00004	4.00004	152.417
5900	4	10	733.623	733.623	-2.03813	29.5424	161.903	295.631	98.3333	4.00004	4.00004	152.621
5910	4	10	733.519	733.519	-2.03784	29.5424	161.905	295.999	98.5	4.00004	4.00004	152.825
5920	4	10	733.415	733.415	-2.03755	29.5424	161.906	296.366	98.6667	4.00004	4.00004	153.028
5930	4	10	733.311	733.311	-2.03726	29.5424	161.908	296.732	98.8333	4.00004	4.00004	153.232
5940	4	10	733.207	733.207	-2.03697	29.5424	161.91	297.099	99	4.00004	4.00004	153.436
5950	4	10	733.103	733.103	-2.03669	29.5424	161.911	297.465	99.1667	4.00004	4.00004	153.639
5960	4	10	732.999	732.999	-2.0364	29.5424	161.913	297.83	99.3333	4.00004	4.00004	153.843
5970	4	10	732.896	732.896	-2.03611	29.5424	161.915	298.196	99.5	4.00004	4.00004	154.047
5980	4	10	732.792	732.792	-2.03582	29.5424	161.916	298.561	99.6667	4.00004	4.00004	154.25
5990	4	10	732.689	732.689	-2.03553	29.5424	161.918	298.926	99.8333	4.00004	4.00004	154.454
6000	4	10	732.586	732.586	-2.03525	29.5424	161.92	299.291	100	4.00004	4.00004	154.657
6010	4	10	732.483	732.483	-2.03496	29.5424	161.921	299.656	100.167	4.00004	4.00004	154.861
6020	4	10	732.38	732.38	-2.03468	29.5424	161.923	300.02	100.333	4.00004	4.00004	155.064
6030	4	10	732.278	732.278	-2.03439	29.5424	161.924	300.384	100.5	4.00004	4.00004	155.268
6040	4	10	732.175	732.175	-2.0341	29.5424	161.926	300.747	100.667	4.00004	4.00004	155.471
6050	4	10	732.072	732.072	-2.03382	29.5424	161.927	301.111	100.833	4.00004	4.00004	155.674
6060	4	10	731.97	731.97	-2.03354	29.5424	161.929	301.474	101	4.00004	4.00004	155.878
6070	4	10	731.868	731.868	-2.03325	29.5424	161.93	301.837	101.167	4.00004	4.00004	156.081
6080	4	10	731.766	731.766	-2.03297	29.5424	161.932	302.199	101.333	4.00004	4.00004	156.284
6090	4	10	731.664	731.664	-2.03268	29.5424	161.933	302.562	101.5	4.00004	4.00004	156.487
6100	4	10	731.562	731.562	-2.0324	29.5424	161.935	302.924	101.667	4.00004	4.00004	156.691
6110	4	10	731.461	731.461	-2.03212	29.5424	161.936	303.286	101.833	4.00004	4.00004	156.894
6120	4	10	731.359	731.359	-2.03184	29.5424	161.937	303.647	102	4.00004	4.00004	157.097
6130	4	10	731.258	731.258	-2.03155	29.5424	161.939	304.008	102.167	4.00004	4.00004	157.3
6140	4	10	731.156	731.156	-2.03127	29.5424	161.94	304.369	102.333	4.00004	4.00004	157.503
6150	4	10	731.055	731.055	-2.03099	29.5424	161.941	304.73	102.5	4.00004	4.00004	157.706
6160	4	10	730.954	730.954	-2.03071	29.5424	161.943	305.09	102.667	4.00004	4.00004	157.909
6170	4	10	730.853	730.853	-2.03043	29.5424	161.944	305.451	102.833	4.00004	4.00004	158.112
6180	4	10	730.752	730.752	-2.03015	29.5424	161.945	305.811	103	4.00004	4.00004	158.315
6190	4	10	730.652	730.652	-2.02987	29.5424	161.947	306.17	103.167	4.00004	4.00004	158.518
6200	4	10	730.551	730.551	-2.02959	29.5424	161.948	306.53	103.333	4.00004	4.00004	158.721
6210	4	10	730.451	730.451	-2.02931	29.5424	161.949	306.889	103.5	4.00004	4.00004	158.924
6220	4	10	730.35	730.35	-2.02903	29.5424	161.951	307.248	103.667	4.00004	4.00004	159.127
6230	4	10	730.25	730.25	-2.02875	29.5424	161.952	307.606	103.833	4.00004	4.00004	159.33
6240	4	10	730.15	730.15	-2.02847	29.5424	161.953	307.965	104	4.00004	4.00004	159.533
6250	4	10	730.05	730.05	-2.0282	29.5424	161.954	308.323	104.167	4.00004	4.00004	159.735
6260	4	10	729.951	729.951	-2.02792	29.5424	161.956	308.68	104.333	4.00004	4.00004	159.938
6270	4	10	729.851	729.851	-2.02764	29.5424	161.957	309.038	104.5	4.00004	4.00004	160.141
6280	4	10	729.751	729.751	-2.02736	29.5424	161.958	309.395	104.667	4.00004	4.00004	160.344
6290	4	10	729.652	729.652	-2.02709	29.5424	161.959	309.752	104.833	4.00004	4.00004	160.546
6300	4	10	729.552	729.552	-2.02681	29.5424	161.96	310.109	105	4.00004	4.00004	160.749
6310	4	10	729.453	729.453	-2.02653	29.5424	161.961	310.465	105.167	4.00004	4.00004	160.952
6320	4	10	729.354	729.354	-2.02626	29.5424	161.963	310.822	105.333	4.00004	4.00004	161.154
6330	4	10	729.255	729.255	-2.02598	29.5424	161.964	311.178	105.5	4.00004	4.00004	161.357
6340	4	10	729.156	729.156	-2.02571	29.5424	161.965	311.533	105.667	4.00004	4.00004	161.559
6350	4	10	729.057	729.057	-2.02543	29.5424	161.966	311.889	105.833	4.00004	4.00004	161.762
6360	4	10	728.959	728.959	-2.02516	29.5424	161.967	312.244	106	4.00004	4.00004	161.964
6370	4	10	728.86	728.86	-2.02489	29.5424	161.968	312.599	106.167	4.00004	4.00004	162.167
6380	4	10	728.762	728.762	-2.02461	29.5424	161.969	312.953	106.333	4.00004	4.00004	162.369
6390	4	10	728.663	728.663	-2.02434	29.5424	161.97	313.308	106.5	4.00004	4.00004	162.572
6400	4	10	728.565	728.565	-2.02407	29.5424	161.971	313.662	106.667	4.00004	4.00004	162.774
6410	4	10	728.467	728.467	-2.02379	29.5424	161.972	314.016	106.833	4.00004	4.00004	162.976
6420	4	10	728.369	728.369	-2.02352	29.5424	161.973	314.369	107	4.00004	4.00004	163.179
6430	4	10	728.271	728.271	-2.02325	29.5424	161.974	314.723	107.167	4.00004	4.00004	163.381
6440	4	10	728.174	728.174	-2.02298	29.5424	161.975	315.076	107.333	4.00004	4.00004	163.583
6450	4	10	728.076	728.076	-2.0227	29.5424	161.976	315.428	107.5	4.00004	4.00004	163.785
6460	4	10	727.978	727.978	-2.02243	29.5424	161.977	315.781	107.667	4.00004	4.00004	163.988
6470	4	10	727.881	727.881	-2.02216	29.5424	161.978	316.133	107.833	4.00004	4.00004	164.19
6480	4	10	727.784	727.784	-2.02189	29.5424	161.979	316.485	108	4.00004	4.00004	164.392
6490	4	10	727.686	727.686	-2.02162	29.5424	161.98	316.837	108.167	4.00004	4.00004	164.594
6500	4	10	727.589	727.589	-2.02135	29.5424	161.981	317.188	108.333	4.00004	4.00004	164.796
6510	4	10	727.492	727.492	-2.02108	29.5424	161.982	317.54	108.5	4.00004	4.00004	164.998
6520	4	10	727.395	727.395	-2.02081	29.5424	161.983	317.891	108.667	4.00004	4.00004	165.2
6530	4	10	727.299	727.299	-2.02054	29.5424	161.984	318.241	108.833	4.00004	4.00004	165.402
6540	4	10	727.202	727.202	-2.02027	29.5424	161.985	318.592	109	4.00004	4.00004	165.604
6550	4	10	727.105	727.105	-2.02001	29.5424	161.986	318.942	109.167	4.00004	4.00004	165.806
6560	4	10	727.009	727.009	-2.01974	29.5424	161.986	319.292	109.333	4.00004	4.00004	166.008
6570	4	10	726.912	726.912	-2.01947	29.5424	161.987	319.642	109.5	4.00004	4.00004	166.21
6580	4	10	726.816	726.816	-2.0192	29.5424	161.988	319.991	109.667	4.00004	4.00004	166.412
6590	4	10	726.72	726.72	-2.01893	29.5424	161.989	320.34	109.833	4.00004	4.00004	166.614
6600	4	10	726.624	726.624	-2.01867	29.5424	161.99	320.689	110	4.00004	4.00004	166.816
6610	4	10	726.528	726.528	-2.0184	29.5424	161.991	321.038	110.167	4.00004	4.00004	167.018
6620	4	10	726.432	726.432	-2.01813	29.5424	161.992	321.386	110.333	4.00004	4.00004	167.22
6630	4	10	726.336	726.336	-2.01787	29.5424	161.992	321.734	110.5	4.00004	4.00004	167.421
6640	4	10	726.241	726.241	-2.0176	29.5424	161.993	322.082	110.667	4.00004	4.00004	167.623
6650	4	10	726.145	726.145	-2.01734	29.5424	161.994	322.43	110.833	4.00004	4.00004	167.825
6660	4	10	726.05	726.05	-2.01707	29.5424	161.995	322.777	111	4.00004	4.00004	168.026
6670	4	10	725.954	725.954	-2.0168	29.5424	161.996	323.124	111.167	4.00004	4.00004	168.228
6680	4	10	725.859	725.859	-2.01654	29.5424	161.996	323.471	111.333	4.00004	4.00004	168.43
6690	4	10	725.764	725.764	-2.01628	29.5424	161.997	323.818	111.5	4.00004	4.00004	168.631
6700	4	10	725.669	725.669	-2.01601	29.5424	161.998	324.164	111.667	4.00004	4.00004	168.833
6710	4	10	725.574	725.574	-2.01575	29.5424	161.999	324.51	111.833	4.00004	4.00004	169.034
6720	4	10	725.479	725.479	-2.01548	29.5424	161.999	324.856	112	4.00004	4.00004	169.236
6730	4	10	725.384	725.384	-2.01522	29.5424	162	325.201	112.167	4.00004	4.00004	169.437
6740	4	10	725.29	725.29	-2.01496	29.5424	162.001	325.547	112.333	4.00004	4.00004	169.639
6750	4	10	725.195	725.195	-2.01469	29.5424	162.001	325.892	112.5	4.00004	4.00004	169.84
6760	4	10	725.101	725.101	-2.01443	29.5424	162.002	326.237	112.667	4.00004	4.00004	170.042
6770	4	10	725.006	725.006	-2.01417	29.5424	162.003	326.581	112.833	4.00004	4.00004	170.243
6780	4	10	724.912	724.912	-2.01391	29.5424	162.004	326.925	113	4.00004	4.00004	170.444
6790	4	10	724.818	724.818	-2.01364	29.5424	162.004	327.269	113.167	4.00004	4.00004	170.646
6800	4	10	724.724	724.724	-2.01338	29.5424	162.005	327.613	113.333	4.00004	4.00004	170.847
6810	4	10	724.63	724.63	-2.01312	29.5424	162.006	327.957	113.5	4.00004	4.00004	171.048
6820	4	10	724.536	724.536	-2.01286	29.5424	162.006	328.3	113.667	4.00004	4.00004	171.25
6830	4	10	724.442	724.442	-2.0126	29.5424	162.007	328.643	113.833	4.00004	4.00004	171.451
6840	4	10	724.348	724.348	-2.01234	29.5424	162.008	328.986	114	4.00004	4.00004	171.652
6850	4	10	724.255	724.255	-2.01208	29.5424	162.008	329.328	114.167	4.00004	4.00004	171.853
6860	4	10	724.161	724.161	-2.01182	29.5424	162.009	329.67	114.333	4.00004	4.00004	172.054
6870	4	10	724.068	724.068	-2.01156	29.5424	162.01	330.012	114.5	4.00004	4.00004	172.256
6880	4	10	723.974	723.974	-2.0113	29.5424	162.01	330.354	114.667	4.00004	4.00004	172.457
6890	4	10	723.881	723.881	-2.01104	29.5424	162.011	330.696	114.833	4.00004	4.00004	172.658
6900	4	10	723.788	723.788	-2.01078	29.5424	162.011	331.037	115	4.00004	4.00004	172.859
6910	4	10	723.695	723.695	-2.01052	29.5424	162.012	331.378	115.167	4.00004	4.00004	173.06
6920	4	10	723.602	723.602	-2.01026	29.5424	162.013	331.719	115.333	4.00004	4.00004	173.261
6930	4	10	723.509	723.509	-2.01001	29.5424	162.013	332.059	115.5	4.00003	4.00004	173.462
6940	4	10	723.416	723.416	-2.00975	29.5424	162.014	332.399	115.667	4.00003	4.00004	173.663
6950	4	10	723.323	723.323	-2.00949	29.5424	162.014	332.739	115.833	4.00003	4.00004	173.864
6960	4	10	723.231	723.231	-2.00923	29.5424	162.015	333.079	116	4.00003	4.00004	174.065
6970	4	10	723.138	723.138	-2.00897	29.5424	162.015	333.419	116.167	4.00003	4.00004	174.265
6980	4	10	723.046	723.046	-2.00872	29.5424	162.016	333.758	116.333	4.00003	4.00004	174.466
6990	4	10	722.953	722.953	-2.00846	29.5424	162.017	334.097	116.5	4.00003	4.00004	174.667
7000	4	10	722.861	722.861	-2.0082	29.5424	162.017	334.435	116.667	4.00003	4.00004	174.868
7010	4	10	722.769	722.769	-2.00795	29.5424	162.018	334.774	116.833	4.00003	4.00004	175.069
7020	4	10	722.677	722.677	-2.00769	29.5424	162.018	335.112	117	4.00003	4.00004	175.269
7030	4	10	722.585	722.585	-2.00744	29.5424	162.019	335.45	117.167	4.00003	4.00004	175.47
7040	4	10	722.493	722.493	-2.00718	29.5424	162.019	335.788	117.333	4.00003	4.00004	175.671
7050	4	10	722.401	722.401	-2.00693	29.5424	162.02	336.125	117.5	4.00003	4.00004	175.872
7060	4	10	722.309	722.309	-2.00667	29.5424	162.02	336.463	117.667	4.00003	4.00004	176.072
7070	4	10	722.218	722.218	-2.00642	29.5424	162.021	336.799	117.833	4.00003	4.00004	176.273
7080	4	10	722.126	722.126	-2.00616	29.5424	162.021	337.136	118	4.00003	4.00004	176.473
7090	4	10	722.035	722.035	-2.00591	29.5424	162.022	337.473	118.167	4.00003	4.00004	176.674
7100	4	10	721.943	721.943	-2.00565	29.5424	162.022	337.809	118.333	4.00003	4.00004	176.874
7110	4	10	721.852	721.852	-2.0054	29.5424	162.023	338.145	118.5	4.00003	4.00004	177.075
7120	4	10	721.761	721.761	-2.00515	29.5424	162.023	338.481	118.667	4.00003	4.00004	177.275
7130	4	10	721.67	721.67	-2.00489	29.5424	162.024	338.816	118.833	4.00003	4.00004	177.476
7140	4	10	721.579	721.579	-2.00464	29.5424	162.024	339.151	119	4.00003	4.00004	177.676
7150	4	10	721.488	721.488	-2.00439	29.5424	162.025	339.486	119.167	4.00003	4.00004	177.877
7160	4	10	721.397	721.397	-2.00413	29.5424	162.025	339.821	119.333	4.00003	4.00004	178.077
7170	4	10	721.306	721.306	-2.00388	29.5424	162.026	340.155	119.5	4.00003	4.00004	178.278
7180	4	10	721.215	721.215	-2.00363	29.5424	162.026	340.49	119.667	4.00003	4.00004	178.478
7190	4	10	721.125	721.125	-2.00338	29.5424	162.027	340.824	119.833	4.00003	4.00004	178.678
7200	4	10	721.034	721.034	-2.00312	29.5424	162.027	341.157	120	4.00003	4.00004	178.878
7210	4	10	720.944	720.944	-2.00287	29.5424	162.027	341.491	120.167	4.00003	4.00004	179.079
7220	4	10	720.853	720.853	-2.00262	29.5424	162.028	341.824	120.333	4.00003	4.00004	179.279
7230	4	10	720.763	720.763	-2.00237	29.5424	162.028	342.157	120.5	4.00003	4.00004	179.479
7240	4	10	720.673	720.673	-2.00212	29.5424	162.029	342.49	120.667	4.00003	4.00004	179.679
7250	4	10	720.583	720.583	-2.00187	29.5424	162.029	342.822	120.833	4.00003	4.00004	179.88
7260	4	10	720.493	720.493	-2.00162	29.5424	162.03	343.155	121	4.00003	4.00004	180.08
7270	4	10	720.403	720.403	-2.00137	29.5424	162.03	343.487	121.167	4.00003	4.00004	180.28
7280	4	10	720.313	720.313	-2.00112	29.5424	162.03	343.819	121.333	4.00003	4.00004	180.48
7290	4	10	720.223	720.223	-2.00087	29.5424	162.031	344.15	121.5	4.00003	4.00004	180.68
7300	4	10	720.133	720.133	-2.00062	29.5424	162.031	344.481	121.667	4.00003	4.00004	180.88
7310	4	10	720.044	720.044	-2.00037	29.5424	162.032	344.812	121.833	4.00003	4.00004	181.08
7320	4	10	719.954	719.954	-2.00012	29.5424	162.032	345.143	122	4.00003	4.00004	181.28
7330	4	10	719.865	719.865	-1.99987	29.5424	162.032	345.474	122.167	4.00003	4.00004	181.48
7340	4	10	719.775	719.775	-1.99962	29.5424	162.033	345.804	122.333	4.00003	4.00004	181.68
7350	4	10	719.686	719.686	-1.99938	29.5424	162.033	346.134	122.5	4.00003	4.00004	181.88
7360	4	10	719.597	719.597	-1.99913	29.5424	162.034	346.464	122.667	4.00003	4.00004	182.08
7370	4	10	719.508	719.508	-1.99888	29.5424	162.034	346.793	122.833	4.00003	4.00004	182.28
7380	4	10	719.419	719.419	-1.99863	29.5424	162.034	347.123	123	4.00003	4.00004	182.479
7390	4	10	719.33	719.33	-1.99839	29.5424	162.035	347.452	123.167	4.00003	4.00004	182.679
7400	4	10	719.241	719.241	-1.99814	29.5423	162.035	347.781	123.333	4.00003	4.00004	182.879
7410	4	10	719.152	719.152	-1.99789	29.5423	162.035	348.109	123.5	4.00003	4.00004	183.079
7420	4	10	719.063	719.063	-1.99764	29.5423	162.036	348.438	123.667	4.00003	4.00004	183.278
7430	4	10	718.975	718.975	-1.9974	29.5423	162.036	348.766	123.833	4.00003	4.00004	183.478
7440	4	10	718.886	718.886	-1.99715	29.5423	162.036	349.094	124	4.00003	4.00004	183.678
7450	4	10	718.797	718.797	-1.99691	29.5423	162.037	349.421	124.167	4.00003	4.00004	183.878
7460	4	10	718.709	718.709	-1.99666	29.5423	162.037	349.749	124.333	4.00003	4.00003	184.077
7470	4	10	718.621	718.621	-1.99641	29.5423	162.037	350.076	124.5	4.00003	4.00003	184.277
7480	4	10	718.532	718.532	-1.99617	29.5423	162.038	350.403	124.667	4.00003	4.00003	184.476
7490	4	10	718.444	718.444	-1.99592	29.5423	162.038	350.729	124.833	4.00003	4.00003	184.676
7500	4	10	718.356	718.356	-1.99568	29.5423	162.038	351.056	125	4.00003	4.00003	184.876
7510	4	10	718.268	718.268	-1.99543	29.5423	162.039	351.382	125.167	4.00003	4.00003	185.075
7520	4	10	718.18	718.18	-1.99519	29.5423	162.039	351.708	125.333	4.00003	4.00003	185.275
7530	4	10	718.092	718.092	-1.99494	29.5423	162.039	352.033	125.5	4.00003	4.00003	185.474
7540	4	10	718.004	718.004	-1.9947	29.5423	162.04	352.359	125.667	4.00003	4.00003	185.673
7550	4	10	717.917	717.917	-1.99446	29.5423	162.04	352.684	125.833	4.00003	4.00003	185.873
7560	4	10	717.829	717.829	-1.99421	29.5423	162.04	353.009	126	4.00003	4.00003	186.072
7570	4	10	717.741	717.741	-1.99397	29.5423	162.041	353.334	126.167	4.00003	4.00003	186.272
7580	4	10	717.654	717.654	-1.99373	29.5423	162.041	353.658	126.333	4.00003	4.00003	186.471
7590	4	10	717.566	717.566	-1.99348	29.5423	162.041	353.983	126.5	4.00003	4.00003	186.67
7600	4	10	717.479	717.479	-1.99324	29.5423	162.041	354.307	126.667	4.00003	4.00003	186.87
7610	4	10	717.392	717.392	-1.993	29.5423	162.042	354.63	126.833	4.00003	4.00003	187.069
7620	4	10	717.305	717.305	-1.99276	29.5423	162.042	354.954	127	4.00003	4.00003	187.268
7630	4	10	717.217	717.217	-1.99251	29.5423	162.042	355.277	127.167	4.00003	4.00003	187.467
7640	4	10	717.13	717.13	-1.99227	29.5423	162.043	355.6	127.333	4.00003	4.00003	187.667
7650	4	10	717.043	717.043	-1.99203	29.5423	162.043	355.923	127.5	4.00003	4.00003	187.866
7660	4	10	716.956	716.956	-1.99179	29.5423	162.043	356.245	127.667	4.00003	4.00003	188.065
7670	4	10	716.87	716.87	-1.99155	29.5423	162.043	356.568	127.833	4.00003	4.00003	188.264
7680	4	10	716.783	716.783	-1.9913	29.5423	162.044	356.89	128	4.00003	4.00003	188.463
7690	4	10	716.696	716.696	-1.99106	29.5423	162.044	357.212	128.167	4.00003	4.00003	188.662
7700	4	10	716.61	716.61	-1.99082	29.5423	162.044	357.533	128.333	4.00003	4.00003	188.861
7710	4	10	716.523	716.523	-1.99058	29.5423	162.044	357.855	128.5	4.00003	4.00003	189.06
7720	4	10	716.437	716.437	-1.99034	29.5423	162.045	358.176	128.667	4.00003	4.00003	189.259
7730	4	10	716.35	716.35	-1.9901	29.5423	162.045	358.497	128.833	4.00003	4.00003	189.458
7740	4	10	716.264	716.264	-1.98986	29.5423	162.045	358.817	129	4.00003	4.00003	189.657
7750	4	10	716.178	716.178	-1.98962	29.5423	162.045	359.138	129.167	4.00003	4.00003	189.856
7760	4	10	716.091	716.091	-1.98938	29.5423	162.046	359.458	129.333	4.00003	4.00003	190.055
7770	4	10	716.005	716.005	-1.98914	29.5423	162.046	359.778	129.5	4.00003	4.00003	190.254
7780	4	10	715.919	715.919	-1.9889	29.5423	162.046	360.098	129.667	4.00003	4.00003	190.453
7790	4	10	715.833	715.833	-1.98866	29.5423	162.046	360.417	129.833	4.00003	4.00003	190.652
7800	4	10	715.747	715.747	-1.98843	29.5423	162.047	360.736	130	4.00003	4.00003	190.851
7810	4	10	715.662	715.662	-1.98819	29.5423	162.047	361.055	130.167	4.00003	4.00003	191.049
7820	4	10	715.576	715.576	-1.98795	29.5423	162.047	361.374	130.333	4.00003	4.00003	191.248
7830	4	10	715.49	715.49	-1.98771	29.5423	162.047	361.693	130.5	4.00003	4.00003	191.447
7840	4	10	715.405	715.405	-1.98747	29.5423	162.048	362.011	130.667	4.00003	4.00003	191.646
7850	4	10	715.319	715.319	-1.98724	29.5423	162.048	362.329	130.833	4.00003	4.00003	191.844
7860	4	10	715.234	715.234	-1.987	29.5423	162.048	362.647	131	4.00003	4.00003	192.043
7870	4	10	715.148	715.148	-1.98676	29.5423	162.048	362.965	131.167	4.00003	4.00003	192.242
7880	4	10	715.063	715.063	-1.98652	29.5423	162.048	363.282	131.333	4.00003	4.00003	192.44
7890	4	10	714.978	714.978	-1.98629	29.5423	162.049	363.599	131.5	4.00003	4.00003	192.639
7900	4	10	714.893	714.893	-1.98605	29.5423	162.049	363.916	131.667	4.00003	4.00003	192.837
7910	4	10	714.807	714.807	-1.98581	29.5423	162.049	364.233	131.833	4.00003	4.00003	193.036
7920	4	10	714.722	714.722	-1.98558	29.5423	162.049	364.549	132	4.00003	4.00003	193.235
7930	4	10	714.637	714.637	-1.98534	29.5423	162.049	364.865	132.167	4.00003	4.00003	193.433
7940	4	10	714.553	714.553	-1.9851	29.5423	162.05	365.181	132.333	4.00003	4.00003	193.632
7950	4	10	714.468	714.468	-1.98487	29.5423	162.05	365.497	132.5	4.00003	4.00003	193.83
7960	4	10	714.383	714.383	-1.98463	29.5423	162.05	365.812	132.667	4.00003	4.00003	194.028
7970	4	10	714.298	714.298	-1.9844	29.5423	162.05	366.128	132.833	4.00003	4.00003	194.227
7980	4	10	714.214	714.214	-1.98416	29.5423	162.05	366.443	133	4.00003	4.00003	194.425
7990	4	10	714.129	714.129	-1.98393	29.5423	162.051	366.757	133.167	4.00003	4.00003	194.624
8000	4	10	714.045	714.045	-1.98369	29.5423	162.051	367.072	133.333	4.00003	4.00003	194.822
8010	4	10	713.96	713.96	-1.98346	29.5423	162.051	367.386	133.5	4.00003	4.00003	195.02
8020	4	10	713.876	713.876	-1.98322	29.5423	162.051	367.7	133.667	4.00003	4.00003	195.219
8030	4	10	713.792	713.792	-1.98299	29.5423	162.051	368.014	133.833	4.00003	4.00003	195.417
8040	4	10	713.708	713.708	-1.98276	29.5423	162.052	368.328	134	4.00003	4.00003	195.615
8050	4	10	713.624	713.624	-1.98252	29.5423	162.052	368.641	134.167	4.00003	4.00003	195.813
8060	4	10	713.539	713.539	-1.98229	29.5423	162.052	368.954	134.333	4.00003	4.00003	196.012
8070	4	10	713.455	713.455	-1.98205	29.5423	162.052	369.267	134.5	4.00003	4.00003	196.21
8080	4	10	713.372	713.372	-1.98182	29.5423	162.052	369.58	134.667	4.00003	4.00003	196.408
8090	4	10	713.288	713.288	-1.98159	29.5423	162.052	369.892	134.833	4.00003	4.00003	196.606
8100	4	10	713.204	713.204	-1.98135	29.5423	162.053	370.205	135	4.00003	4.00003	196.804
8110	4	10	713.12	713.12	-1.98112	29.5423	162.053	370.517	135.167	4.00003	4.00003	197.002
8120	4	10	713.037	713.037	-1.98089	29.5423	162.053	370.828	135.333	4.00003	4.00003	197.2
8130	4	10	712.953	712.953	-1.98066	29.5423	162.053	371.14	135.5	4.00003	4.00003	197.398
8140	4	10	712.87	712.87	-1.98043	29.5423	162.053	371.451	135.667	4.00003	4.00003	197.596
8150	4	10	712.786	712.786	-1.98019	29.5423	162.053	371.762	135.833	4.00003	4.00003	197.794
8160	4	10	712.703	712.703	-1.97996	29.5423	162.054	372.073	136	4.00003	4.00003	197.992
8170	4	10	712.619	712.619	-1.97973	29.5423	162.054	372.384	136.167	4.00003	4.00003	198.19
8180	4	10	712.536	712.536	-1.9795	29.5423	162.054	372.694	136.333	4.00003	4.00003	198.388
8190	4	10	712.453	712.453	-1.97927	29.5423	162.054	373.004	136.5	4.00003	4.00003	198.586
8200	4	10	712.37	712.37	-1.97904	29.5423	162.054	373.314	136.667	4.00003	4.00003	198.784
8210	4	10	712.287	712.287	-1.97881	29.5423	162.054	373.624	136.833	4.00003	4.00003	198.982
8220	4	10	712.204	712.204	-1.97858	29.5423	162.055	373.933	137	4.00003	4.00003	199.18
8230	4	10	712.121	712.121	-1.97834	29.5423	162.055	374.243	137.167	4.00003	4.00003	199.377
8240	4	10	712.038	712.038	-1.97811	29.5423	162.055	374.552	137.333	4.00003	4.00003	199.575
8250	4	10	711.955	711.955	-1.97788	29.5423	162.055	374.86	137.5	4.00003	4.00003	199.773
8260	4	10	711.873	711.873	-1.97765	29.5423	162.055	375.169	137.667	4.00003	4.00003	199.971
8270	4	10	711.79	711.79	-1.97742	29.5423	162.055	375.477	137.833	4.00003	4.00003	200.168
8280	4	10	711.708	711.708	-1.9772	29.5423	162.055	375.785	138	4.00003	4.00003	200.366
8290	4	10	711.625	711.625	-1.97697	29.5423	162.056	376.093	138.167	4.00003	4.00003	200.564
8300	4	10	711.543	711.543	-1.97674	29.5423	162.056	376.401	138.333	4.00003	4.00003	200.762
8310	4	10	711.46	711.46	-1.97651	29.5423	162.056	376.708	138.5	4.00003	4.00003	200.959
8320	4	10	711.378	711.378	-1.97628	29.5423	162.056	377.015	138.667	4.00003	4.00003	201.157
8330	4	10	711.296	711.296	-1.97605	29.5423	162.056	377.322	138.833	4.00003	4.00003	201.354
8340	4	10	711.214	711.214	-1.97582	29.5423	162.056	377.629	139	4.00003	4.00003	201.552
8350	4	10	711.132	711.132	-1.97559	29.5423	162.056	377.936	139.167	4.00003	4.00003	201.749
8360	4	10	711.05	711.05	-1.97537	29.5423	162.056	378.242	139.333	4.00003	4.00003	201.947
8370	4	10	710.968	710.968	-1.97514	29.5423	162.057	378.548	139.5	4.00003	4.00003	202.144
8380	4	10	710.886	710.886	-1.97491	29.5423	162.057	378.854	139.667	4.00003	4.00003	202.342
8390	4	10	710.804	710.804	-1.97468	29.5423	162.057	379.159	139.833	4.00003	4.00003	202.539
8400	4	10	710.722	710.722	-1.97446	29.5423	162.057	379.465	140	4.00003	4.00003	202.737
8410	4	10	710.64	710.64	-1.97423	29.5423	162.057	379.77	140.167	4.00003	4.00003	202.934
8420	4	10	710.559	710.559	-1.974	29.5423	162.057	380.075	140.333	4.00003	4.00003	203.132
8430	4	10	710.477	710.477	-1.97377	29.5423	162.057	380.38	140.5	4.00003	4.00003	203.329
8440	4	10	710.396	710.396	-1.97355	29.5423	162.057	380.684	140.667	4.00003	4.00003	203.526
8450	4	10	710.314	710.314	-1.97332	29.5423	162.058	380.988	140.833	4.00003	4.00003	203.724
8460	4	10	710.233	710.233	-1.9731	29.5423	162.058	381.292	141	4.00003	4.00003	203.921
8470	4	10	710.151	710.151	-1.97287	29.5423	162.058	381.596	141.167	4.00003	4.00003	204.118
8480	4	10	710.07	710.07	-1.97264	29.5423	162.058	381.9	141.333	4.00003	4.00003	204.315
8490	4	10	709.989	709.989	-1.97242	29.5423	162.058	382.203	141.5	4.00003	4.00003	204.513
8500	4	10	709.908	709.908	-1.97219	29.5423	162.058	382.506	141.667	4.00003	4.00003	204.71
8510	4	10	709.827	709.827	-1.97197	29.5423	162.058	382.809	141.833	4.00003	4.00003	204.907
8520	4	10	709.746	709.746	-1.97174	29.5423	162.058	383.112	142	4.00003	4.00003	205.104
8530	4	10	709.665	709.665	-1.97152	29.5423	162.058	383.414	142.167	4.00003	4.00003	205.301
8540	4	10	709.584	709.584	-1.97129	29.5423	162.059	383.716	142.333	4.00003	4.00003	205.498
8550	4	10	709.503	709.503	-1.97107	29.5423	162.059	384.018	142.5	4.00003	4.00003	205.695
8560	4	10	709.422	709.422	-1.97084	29.5423	162.059	384.32	142.667	4.00003	4.00003	205.892
8570	4	10	709.342	709.342	-1.97062	29.5423	162.059	384.622	142.833	4.00003	4.00003	206.089
8580	4	10	709.261	709.261	-1.97039	29.5423	162.059	384.923	143	4.00003	4.00003	206.287
8590	4	10	709.181	709.181	-1.97017	29.5423	162.059	385.224	143.167	4.00003	4.00003	206.483
8600	4	10	709.1	709.1	-1.96995	29.5423	162.059	385.525	143.333	4.00003	4.00003	206.68
8610	4	10	709.02	709.02	-1.96972	29.5423	162.059	385.826	143.5	4.00003	4.00003	206.877
8620	4	10	708.939	708.939	-1.9695	29.5423	162.059	386.126	143.667	4.00003	4.00003	207.074
8630	4	10	708.859	708.859	-1.96928	29.5423	162.06	386.426	143.833	4.00003	4.00003	207.271
8640	4	10	708.779	708.779	-1.96905	29.5423	162.06	386.726	144	4.00003	4.00003	207.468
8650	4	10	708.699	708.699	-1.96883	29.5423	162.06	387.026	144.167	4.00003	4.00003	207.665
8660	4	10	708.619	708.619	-1.96861	29.5423	162.06	387.326	144.333	4.00003	4.00003	207.862
8670	4	10	708.539	708.539	-1.96839	29.5423	162.06	387.625	144.5	4.00003	4.00003	208.059
8680	4	10	708.459	708.459	-1.96816	29.5423	162.06	387.924	144.667	4.00003	4.00003	208.255
8690	4	10	708.379	708.379	-1.96794	29.5423	162.06	388.223	144.833	4.00003	4.00003	208.452
8700	4	10	708.299	708.299	-1.96772	29.5423	162.06	388.522	145	4.00003	4.00003	208.649
8710	4	10	708.219	708.219	-1.9675	29.5423	162.06	388.82	145.167	4.00003	4.00003	208.846
8720	4	10	708.139	708.139	-1.96728	29.5423	162.06	389.118	145.333	4.00003	4.00003	209.042
8730	4	10	708.06	708.06	-1.96705	29.5423	162.06	389.416	145.5	4.00003	4.00003	209.239
8740	4	10	707.98	707.98	-1.96683	29.5423	162.061	389.714	145.667	4.00003	4.00003	209.436
8750	4	10	707.9	707.9	-1.96661	29.5423	162.061	390.012	145.833	4.00003	4.00003	209.632
8760	4	10	707.821	707.821	-1.96639	29.5423	162.061	390.309	146	4.00003	4.00003	209.829
8770	4	10	707.742	707.742	-1.96617	29.5423	162.061	390.606	146.167	4.00003	4.00003	210.026
8780	4	10	707.662	707.662	-1.96595	29.5423	162.061	390.903	146.333	4.00003	4.00003	210.222
8790	4	10	707.583	707.583	-1.96573	29.5423	162.061	391.2	146.5	4.00003	4.00003	210.419
8800	4	10	707.504	707.504	-1.96551	29.5423	162.061	391.496	146.667	4.00003	4.00003	210.615
8810	4	10	707.424	707.424	-1.96529	29.5423	162.061	391.792	146.833	4.00003	4.00003	210.812
8820	4	10	707.345	707.345	-1.96507	29.5423	162.061	392.088	147	4.00003	4.00003	211.008
8830	4	10	707.266	707.266	-1.96485	29.5423	162.061	392.384	147.167	4.00003	4.00003	211.205
8840	4	10	707.187	707.187	-1.96463	29.5423	162.061	392.68	147.333	4.00003	4.00003	211.401
8850	4	10	707.108	707.108	-1.96441	29.5423	162.061	392.975	147.5	4.00003	4.00003	211.598
8860	4	10	707.029	707.029	-1.96419	29.5423	162.061	393.27	147.667	4.00003	4.00003	211.794
8870	4	10	706.951	706.951	-1.96397	29.5423	162.062	393.565	147.833	4.00003	4.00003	211.99
8880	4	10	706.872	706.872	-1.96375	29.5423	162.062	393.86	148	4.00003	4.00003	212.187
8890	4	10	706.793	706.793	-1.96353	29.5423	162.062	394.154	148.167	4.00003	4.00003	212.383
8900	4	10	706.715	706.715	-1.96331	29.5423	162.062	394.449	148.333	4.00003	4.00003	212.579
8910	4	10	706.636	706.636	-1.9631	29.5423	162.062	394.743	148.5	4.00003	4.00003	212.776
8920	4	10	706.558	706.558	-1.96288	29.5423	162.062	395.036	148.667	4.00003	4.00003	212.972
8930	4	10	706.479	706.479	-1.96266	29.5423	162.062	395.33	148.833	4.00003	4.00003	213.168
8940	4	10	706.401	706.401	-1.96244	29.5423	162.062	395.623	149	4.00003	4.00003	213.364
8950	4	10	706.322	706.322	-1.96222	29.5423	162.062	395.917	149.167	4.00003	4.00003	213.561
8960	4	10	706.244	706.244	-1.96201	29.5423	162.062	396.21	149.333	4.00003	4.00003	213.757
8970	4	10	706.166	706.166	-1.96179	29.5423	162.062	396.502	149.5	4.00003	4.00003	213.953
8980	4	10	706.088	706.088	-1.96157	29.5423	162.062	396.795	149.667	4.00003	4.00003	214.149
8990	4	10	706.01	706.01	-1.96136	29.5423	162.062	397.087	149.833	4.00003	4.00003	214.345
9000	4	10	705.932	705.932	-1.96114	29.5423	162.062	397.379	150	4.00003	4.00003	214.541
9010	4	10	705.854	705.854	-1.96092	29.5423	162.063	397.671	150.167	4.00003	4.00003	214.737
9020	4	10	705.776	705.776	-1.96071	29.5423	162.063	397.963	150.333	4.00003	4.00003	214.933
9030	4	10	705.698	705.698	-1.96049	29.5423	162.063	398.254	150.5	4.00003	4.00003	215.129
9040	4	10	705.62	705.62	-1.96027	29.5423	162.063	398.546	150.667	4.00003	4.00003	215.325
9050	4	10	705.543	705.543	-1.96006	29.5423	162.063	398.837	150.833	4.00003	4.00003	215.521
9060	4	10	705.465	705.465	-1.95984	29.5423	162.063	399.127	151	4.00003	4.00003	215.717
9070	4	10	705.387	705.387	-1.95962	29.5423	162.063	399.418	151.167	4.00003	4.00003	215.913
9080	4	10	705.31	705.31	-1.95941	29.5423	162.063	399.708	151.333	4.00003	4.00003	216.109
9090	4	10	705.232	705.232	-1.95919	29.5423	162.063	399.999	151.5	4.00003	4.00003	216.305
9100	4	10	705.155	705.155	-1.95898	29.5423	162.063	400.289	151.667	4.00003	4.00003	216.501
9110	4	10	705.077	705.077	-1.95876	29.5423	162.063	400.578	151.833	4.00003	4.00003	216.697
9120	4	10	705	705	-1.95855	29.5423	162.063	400.868	152	4.00003	4.00003	216.893
9130	4	10	704.923	704.923	-1.95833	29.5423	162.063	401.157	152.167	4.00003	4.00003	217.088
9140	4	10	704.846	704.846	-1.95812	29.5423	162.063	401.446	152.333	4.00003	4.00003	217.284
9150	4	10	704.769	704.769	-1.95791	29.5423	162.063	401.735	152.5	4.00003	4.00003	217.48
9160	4	10	704.692	704.692	-1.95769	29.5423	162.063	402.024	152.667	4.00003	4.00003	217.676
9170	4	10	704.615	704.615	-1.95748	29.5423	162.063	402.312	152.833	4.00003	4.00003	217.871
9180	4	10	704.538	704.538	-1.95726	29.5423	162.064	402.6	153	4.00003	4.00003	218.067
9190	4	10	704.461	704.461	-1.95705	29.5423	162.064	402.888	153.167	4.00003	4.00003	218.263
9200	4	10	704.384	704.384	-1.95684	29.5423	162.064	403.176	153.333	4.00003	4.00003	218.459
9210	4	10	704.307	704.307	-1.95662	29.5423	162.064	403.464	153.5	4.00003	4.00003	218.654
9220	4	10	704.23	704.23	-1.95641	29.5423	162.064	403.751	153.667	4.00003	4.00003	218.85
9230	4	10	704.154	704.154	-1.9562	29.5423	162.064	404.038	153.833	4.00003	4.00003	219.045
9240	4	10	704.077	704.077	-1.95598	29.5423	162.064	404.325	154	4.00003	4.00003	219.241
9250	4	10	704.001	704.001	-1.95577	29.5423	162.064	404.612	154.167	4.00003	4.00003	219.437
9260	4	10	703.924	703.924	-1.95556	29.5423	162.064	404.899	154.333	4.00003	4.00003	219.632
9270	4	10	703.848	703.848	-1.95535	29.5423	162.064	405.185	154.5	4.00003	4.00003	219.828
9280	4	10	703.771	703.771	-1.95513	29.5423	162.064	405.471	154.667	4.00003	4.00003	220.023
9290	4	10	703.695	703.695	-1.95492	29.5423	162.064	405.757	154.833	4.00003	4.00003	220.219
9300	4	10	703.619	703.619	-1.95471	29.5423	162.064	406.043	155	4.00003	4.00003	220.414
9310	4	10	703.543	703.543	-1.9545	29.5423	162.064	406.328	155.167	4.00003	4.00003	220.609
9320	4	10	703.467	703.467	-1.95429	29.5423	162.064	406.613	155.333	4.00003	4.00003	220.805
9330	4	10	703.391	703.391	-1.95407	29.5423	162.064	406.898	155.5	4.00003	4.00003	221
9340	4	10	703.315	703.315	-1.95386	29.5423	162.064	407.183	155.667	4.00003	4.00003	221.196
9350	4	10	703.239	703.239	-1.95365	29.5423	162.064	407.468	155.833	4.00003	4.00003	221.391
9360	4	10	703.163	703.163	-1.95344	29.5423	162.064	407.752	156	4.00003	4.00003	221.586
9370	4	10	703.087	703.087	-1.95323	29.5423	162.064	408.037	156.167	4.00003	4.00003	221.782
9380	4	10	703.011	703.011	-1.95302	29.5423	162.064	408.32	156.333	4.00003	4.00003	221.977
9390	4	10	702.935	702.935	-1.95281	29.5423	162.065	408.604	156.5	4.00003	4.00003	222.172
9400	4	10	702.86	702.86	-1.9526	29.5423	162.065	408.888	156.667	4.00003	4.00003	222.367
9410	4	10	702.784	702.784	-1.95239	29.5423	162.065	409.171	156.833	4.00003	4.00003	222.563
9420	4	10	702.709	702.709	-1.95218	29.5423	162.065	409.454	157	4.00003	4.00003	222.758
9430	4	10	702.633	702.633	-1.95197	29.5423	162.065	409.737	157.167	4.00003	4.00003	222.953
9440	4	10	702.558	702.558	-1.95176	29.5423	162.065	410.02	157.333	4.00003	4.00003	223.148
9450	4	10	702.482	702.482	-1.95155	29.5423	162.065	410.303	157.5	4.00003	4.00003	223.343
9460	4	10	702.407	702.407	-1.95134	29.5423	162.065	410.585	157.667	4.00003	4.00003	223.538
9470	4	10	702.332	702.332	-1.95113	29.5423	162.065	410.867	157.833	4.00003	4.00003	223.733
9480	4	10	702.256	702.256	-1.95092	29.5423	162.065	411.149	158	4.00003	4.00003	223.928
9490	4	10	702.181	702.181	-1.95071	29.5423	162.065	411.431	158.167	4.00003	4.00003	224.124
9500	4	10	702.106	702.106	-1.9505	29.5423	162.065	411.712	158.333	4.00003	4.00003	224.319
9510	4	10	702.031	702.031	-1.9503	29.5423	162.065	411.993	158.5	4.00003	4.00003	224.514
9520	4	10	701.956	701.956	-1.95009	29.5423	162.065	412.274	158.667	4.00003	4.00003	224.709
9530	4	10	701.881	701.881	-1.94988	29.5423	162.065	412.555	158.833	4.00003	4.00003	224.904
9540	4	10	701.806	701.806	-1.94967	29.5423	162.065	412.836	159	4.00003	4.00003	225.098
9550	4	10	701.732	701.732	-1.94946	29.5423	162.065	413.116	159.167	4.00003	4.00003	225.293
9560	4	10	701.657	701.657	-1.94925	29.5423	162.065	413.397	159.333	4.00003	4.00003	225.488
9570	4	10	701.582	701.582	-1.94905	29.5423	162.065	413.677	159.5	4.00003	4.00003	225.683
9580	4	10	701.508	701.508	-1.94884	29.5423	162.065	413.957	159.667	4.00003	4.00003	225.878
9590	4	10	701.433	701.433	-1.94863	29.5423	162.065	414.236	159.833	4.00003	4.00003	226.073
9600	4	10	701.358	701.358	-1.94843	29.5423	162.065	414.516	160	4.00003	4.00003	226.268
9610	4	10	701.284	701.284	-1.94822	29.5423	162.065	414.795	160.167	4.00003	4.00003	226.463
9620	4	10	701.21	701.21	-1.94801	29.5423	162.065	415.074	160.333	4.00003	4.00003	226.657
9630	4	10	701.135	701.135	-1.9478	29.5423	162.065	415.353	160.5	4.00003	4.00003	226.852
9640	4	10	701.061	701.061	-1.9476	29.5423	162.065	415.631	160.667	4.00003	4.00003	227.047
9650	4	10	700.987	700.987	-1.94739	29.5423	162.065	415.91	160.833	4.00003	4.00003	227.242
9660	4	10	700.912	700.912	-1.94719	29.5423	162.066	416.188	161	4.00003	4.00003	227.436
9670	4	10	700.838	700.838	-1.94698	29.5423	162.066	416.466	161.167	4.00003	4.00003	227.631
9680	4	10	700.764	700.764	-1.94677	29.5423	162.066	416.743	161.333	4.00003	4.00003	227.826
9690	4	10	700.69	700.69	-1.94657	29.5423	162.066	417.021	161.5	4.00003	4.00003	228.02
9700	4	10	700.616	700.616	-1.94636	29.5423	162.066	417.298	161.667	4.00003	4.00003	228.215
9710	4	10	700.542	700.542	-1.94616	29.5423	162.066	417.575	161.833	4.00003	4.00003	228.409
9720	4	10	700.469	700.469	-1.94595	29.5423	162.066	417.852	162	4.00003	4.00003	228.604
9730	4	10	700.395	700.395	-1.94575	29.5423	162.066	418.129	162.167	4.00003	4.00003	228.799
9740	4	10	700.321	700.321	-1.94554	29.5423	162.066	418.406	162.333	4.00003	4.00003	228.993
9750	4	10	700.247	700.247	-1.94534	29.5423	162.066	418.682	162.5	4.00003	4.00003	229.188
9760	4	10	700.174	700.174	-1.94513	29.5423	162.066	418.958	162.667	4.00003	4.00003	229.382
9770	4	10	700.1	700.1	-1.94493	29.5423	162.066	419.234	162.833	4.00003	4.00003	229.577
9780	4	10	700.027	700.027	-1.94472	29.5423	162.066	419.51	163	4.00003	4.00003	229.771
9790	4	10	699.953	699.953	-1.94452	29.5423	162.066	419.785	163.167	4.00003	4.00003	229.965
9800	4	10	699.88	699.88	-1.94431	29.5423	162.066	420.061	163.333	4.00003	4.00003	230.16
9810	4	10	699.806	699.806	-1.94411	29.5423	162.066	420.336	163.5	4.00003	4.00003	230.354
9820	4	10	699.733	699.733	-1.94391	29.5423	162.066	420.611	163.667	4.00003	4.00003	230.549
9830	4	10	699.66	699.66	-1.9437	29.5423	162.066	420.885	163.833	4.00003	4.00003	230.743
9840	4	10	699.587	699.587	-1.9435	29.5423	162.066	421.16	164	4.00003	4.00003	230.937
9850	4	10	699.514	699.514	-1.9433	29.5423	162.066	421.434	164.167	4.00003	4.00003	231.132
9860	4	10	699.441	699.441	-1.94309	29.5423	162.066	421.708	164.333	4.00003	4.00003	231.326
9870	4	10	699.368	699.368	-1.94289	29.5423	162.066	421.982	164.5	4.00003	4.00003	231.52
9880	4	10	699.295	699.295	-1.94269	29.5423	162.066	422.256	164.667	4.00003	4.00003	231.714
9890	4	10	699.222	699.222	-1.94249	29.5423	162.066	422.529	164.833	4.00003	4.00003	231.909
9900	4	10	699.149	699.149	-1.94228	29.5423	162.066	422.802	165	4.00003	4.00003	232.103
9910	4	10	699.076	699.076	-1.94208	29.5423	162.066	423.075	165.167	4.00003	4.00003	232.297
9920	4	10	699.003	699.003	-1.94188	29.5423	162.066	423.348	165.333	4.00003	4.00003	232.491
9930	4	10	698.931	698.931	-1.94168	29.5423	162.066	423.621	165.5	4.00003	4.00003	232.685
9940	4	10	698.858	698.858	-1.94147	29.5423	162.066	423.894	165.667	4.00003	4.00003	232.879
9950	4	10	698.785	698.785	-1.94127	29.5423	162.066	424.166	165.833	4.00003	4.00003	233.074
9960	4	10	698.713	698.713	-1.94107	29.5423	162.066	424.438	166	4.00003	4.00003	233.268
9970	4	10	698.64	698.64	-1.94087	29.5423	162.066	424.71	166.167	4.00003	4.00003	233.462
9980	4	10	698.568	698.568	-1.94067	29.5423	162.066	424.981	166.333	4.00003	4.00003	233.656
9990	4	10	698.496	698.496	-1.94047	29.5423	162.066	425.253	166.5	4.00003	4.00003	233.85
10000	4	10	698.423	698.423	-1.94027	29.5423	162.066	425.524	166.667	4.00003	4.00003	234.044
10010	4	10	698.351	698.351	-1.94006	29.5423	162.066	425.795	166.833	4.00003	4.00003	234.238
10020	4	10	698.279	698.279	-1.93986	29.5423	162.066	426.066	167	4.00003	4.00003	234.432
10030	4	10	698.207	698.207	-1.93966	29.5423	162.066	426.337	167.167	4.00003	4.00003	234.626
10040	4	10	698.135	698.135	-1.93946	29.5423	162.066	426.607	167.333	4.00003	4.00003	234.82
10050	4	10	698.063	698.063	-1.93926	29.5423	162.067	426.877	167.5	4.00003	4.00003	235.014
10060	4	10	697.991	697.991	-1.93906	29.5423	162.067	427.147	167.667	4.00003	4.00003	235.207
10070	4	10	697.919	697.919	-1.93886	29.5423	162.067	427.417	167.833	4.00003	4.00003	235.401
10080	4	10	697.847	697.847	-1.93866	29.5423	162.067	427.687	168	4.00003	4.00003	235.595
10090	4	10	697.775	697.775	-1.93846	29.5423	162.067	427.956	168.167	4.00003	4.00003	235.789
10100	4	10	697.703	697.703	-1.93826	29.5423	162.067	428.226	168.333	4.00003	4.00003	235.983
10110	4	10	697.632	697.632	-1.93806	29.5423	162.067	428.495	168.5	4.00003	4.00003	236.177
10120	4	10	697.56	697.56	-1.93787	29.5423	162.067	428.764	168.667	4.00003	4.00003	236.37
10130	4	10	697.488	697.488	-1.93767	29.5423	162.067	429.032	168.833	4.00003	4.00003	236.564
10140	4	10	697.417	697.417	-1.93747	29.5423	162.067	429.301	169	4.00003	4.00003	236.758
10150	4	10	697.345	697.345	-1.93727	29.5423	162.067	429.569	169.167	4.00003	4.00003	236.951
10160	4	10	697.274	697.274	-1.93707	29.5423	162.067	429.837	169.333	4.00003	4.00003	237.145
10170	4	10	697.202	697.202	-1.93687	29.5423	162.067	430.105	169.5	4.00003	4.00003	237.339
10180	4	10	697.131	697.131	-1.93667	29.5423	162.067	430.373	169.667	4.00003	4.00003	237.532
10190	4	10	697.06	697.06	-1.93648	29.5423	162.067	430.64	169.833	4.00003	4.00003	237.726
10200	4	10	696.989	696.989	-1.93628	29.5423	162.067	430.907	170	4.00003	4.00003	237.92
10210	4	10	696.917	696.917	-1.93608	29.5423	162.067	431.174	170.167	4.00003	4.00003	238.113
10220	4	10	696.846	696.846	-1.93588	29.5423	162.067	431.441	170.333	4.00003	4.00003	238.307
10230	4	10	696.775	696.775	-1.93568	29.5423	162.067	431.708	170.5	4.00003	4.00003	238.5
10240	4	10	696.704	696.704	-1.93549	29.5423	162.067	431.974	170.667	4.00003	4.00003	238.694
10250	4	10	696.633	696.633	-1.93529	29.5423	162.067	432.241	170.833	4.00003	4.00003	238.887
10260	4	10	696.562	696.562	-1.93509	29.5423	162.067	432.507	171	4.00003	4.00003	239.081
10270	4	10	696.491	696.491	-1.9349	29.5423	162.067	432.773	171.167	4.00003	4.00003	239.274
10280	4	10	696.421	696.421	-1.9347	29.5423	162.067	433.038	171.333	4.00003	4.00003	239.468
10290	4	10	696.35	696.35	-1.9345	29.5423	162.067	433.304	171.5	4.00003	4.00003	239.661
10300	4	10	696.279	696.279	-1.93431	29.5423	162.067	433.569	171.667	4.00003	4.00003	239.855
10310	4	10	696.209	696.209	-1.93411	29.5423	162.067	433.834	171.833	4.00003	4.00003	240.048
10320	4	10	696.138	696.138	-1.93391	29.5423	162.067	434.099	172	4.00003	4.00003	240.241
10330	4	10	696.067	696.067	-1.93372	29.5423	162.067	434.364	172.167	4.00003	4.00003	240.435
10340	4	10	695.997	695.997	-1.93352	29.5423	162.067	434.628	172.333	4.00003	4.00003	240.628
10350	4	10	695.926	695.926	-1.93332	29.5423	162.067	434.893	172.5	4.00003	4.00003	240.821
10360	4	10	695.856	695.856	-1.93313	29.5423	162.067	435.157	172.667	4.00003	4.00003	241.015
10370	4	10	695.786	695.786	-1.93293	29.5423	162.067	435.421	172.833	4.00003	4.00003	241.208
10380	4	10	695.716	695.716	-1.93274	29.5423	162.067	435.684	173	4.00003	4.00003	241.401
10390	4	10	695.645	695.645	-1.93254	29.5423	162.067	435.948	173.167	4.00003	4.00003	241.595
10400	4	10	695.575	695.575	-1.93235	29.5423	162.067	436.211	173.333	4.00003	4.00003	241.788
10410	4	10	695.505	695.505	-1.93215	29.5423	162.067	436.474	173.5	4.00003	4.00003	241.981
10420	4	10	695.435	695.435	-1.93196	29.5423	162.067	436.737	173.667	4.00003	4.00003	242.174
10430	4	10	695.365	695.365	-1.93176	29.5423	162.067	437	173.833	4.00003	4.00003	242.367
10440	4	10	695.295	695.295	-1.93157	29.5423	162.067	437.263	174	4.00003	4.00003	242.56
10450	4	10	695.225	695.225	-1.93138	29.5423	162.067	437.525	174.167	4.00003	4.00003	242.754
10460	4	10	695.155	695.155	-1.93118	29.5423	162.067	437.787	174.333	4.00003	4.00003	242.947
10470	4	10	695.085	695.085	-1.93099	29.5423	162.067	438.049	174.5	4.00003	4.00003	243.14
10480	4	10	695.016	695.016	-1.93079	29.5423	162.067	438.311	174.667	4.00003	4.00003	243.333
10490	4	10	694.946	694.946	-1.9306	29.5423	162.067	438.573	174.833	4.00003	4.00003	243.526
10500	4	10	694.876	694.876	-1.93041	29.5423	162.067	438.834	175	4.00003	4.00003	243.719
10510	4	10	694.807	694.807	-1.93021	29.5423	162.067	439.095	175.167	4.00003	4.00003	243.912
10520	4	10	694.737	694.737	-1.93002	29.5423	162.067	439.356	175.333	4.00003	4.00003	244.105
10530	4	10	694.668	694.668	-1.92983	29.5423	162.067	439.617	175.5	4.00003	4.00003	244.298
10540	4	10	694.598	694.598	-1.92963	29.5423	162.067	439.878	175.667	4.00003	4.00003	244.491
10550	4	10	694.529	694.529	-1.92944	29.5423	162.067	440.138	175.833	4.00003	4.00003	244.684
10560	4	10	694.46	694.46	-1.92925	29.5423	162.067	440.398	176	4.00003	4.00003	244.877
10570	4	10	694.39	694.39	-1.92905	29.5423	162.067	440.658	176.167	4.00003	4.00003	245.069
10580	4	10	694.321	694.321	-1.92886	29.5423	162.067	440.918	176.333	4.00003	4.00003	245.262
10590	4	10	694.252	694.252	-1.92867	29.5423	162.067	441.178	176.5	4.00003	4.00003	245.455
10600	4	10	694.183	694.183	-1.92848	29.5423	162.067	441.437	176.667	4.00003	4.00003	245.648
10610	4	10	694.114	694.114	-1.92829	29.5423	162.067	441.697	176.833	4.00003	4.00003	245.841
10620	4	10	694.045	694.045	-1.92809	29.5423	162.067	441.956	177	4.00003	4.00003	246.034
10630	4	10	693.976	693.976	-1.9279	29.5423	162.067	442.215	177.167	4.00003	4.00003	246.226
10640	4	10	693.907	693.907	-1.92771	29.5423	162.067	442.473	177.333	4.00003	4.00003	246.419
10650	4	10	693.838	693.838	-1.92752	29.5423	162.067	442.732	177.5	4.00003	4.00003	246.612
10660	4	10	693.769	693.769	-1.92733	29.5423	162.067	442.99	177.667	4.00003	4.00003	246.805
10670	4	10	693.7	693.7	-1.92714	29.5423	162.067	443.248	177.833	4.00003	4.00003	246.997
10680	4	10	693.632	693.632	-1.92695	29.5423	162.067	443.506	178	4.00003	4.00003	247.19
10690	4	10	693.563	693.563	-1.92675	29.5423	162.067	443.764	178.167	4.00003	4.00003	247.383
10700	4	10	693.494	693.494	-1.92656	29.5423	162.067	444.022	178.333	4.00003	4.00003	247.575
10710	4	10	693.426	693.426	-1.92637	29.5423	162.067	444.279	178.5	4.00003	4.00003	247.768
10720	4	10	693.357	693.357	-1.92618	29.5423	162.067	444.536	178.667	4.00003	4.00003	247.96
10730	4	10	693.289	693.289	-1.92599	29.5423	162.067	444.793	178.833	4.00003	4.00003	248.153
10740	4	10	693.22	693.22	-1.9258	29.5423	162.068	445.05	179	4.00003	4.00003	248.346
10750	4	10	693.152	693.152	-1.92561	29.5423	162.068	445.307	179.167	4.00003	4.00003	248.538
10760	4	10	693.084	693.084	-1.92542	29.5423	162.068	445.563	179.333	4.00003	4.00003	248.731
10770	4	10	693.015	693.015	-1.92523	29.5423	162.068	445.819	179.5	4.00003	4.00003	248.923
10780	4	10	692.947	692.947	-1.92504	29.5423	162.068	446.075	179.667	4.00003	4.00003	249.116
10790	4	10	692.879	692.879	-1.92485	29.5423	162.068	446.331	179.833	4.00003	4.00003	249.308
10800	4	10	692.811	692.811	-1.92466	29.5423	162.068	446.587	180	4.00003	4.00003	249.501
10810	0	10	-9942.41	0	-1.92448	29.5423	162.068	446.842	180.167	4.00003	4.00003	249.501
10820	5	10	4044.21	4044.21	-1.92429	27.618	162.068	447.097	180.333	3.73948	4.00003	250.624
10830	5	10	507.477	507.477	-1.66697	37.1849	161.956	447.314	180.5	5.03484	3.9946	250.765
10840	5	10	1521.24	1521.24	-2.94632	35.6483	162.4	447.721	180.667	4.82678	4.01628	251.187
10850	0	10	-12384.7	0	-2.73605	37.1379	162.75	448.097	180.833	5.02847	4.03317	251.187
10860	0	10	-11259.2	0	-2.93116	34.2067	163.183	448.502	181	4.63159	4.05392	251.187
10870	0	10	-10489.5	0	-2.53468	31.6721	163.441	448.848	181.167	4.28839	4.06596	251.187
10880	0	10	-9822.95	0	-2.19304	29.479	163.55	449.144	181.333	3.99146	4.0706	251.187
10890	0	10	-9245.42	0	-1.89865	27.5804	163.531	449.397	181.5	3.73438	4.06895	251.187
10900	0	10	-8744.56	0	-1.64496	25.9354	163.402	449.611	181.667	3.51165	4.06197	251.187
10910	0	10	-8309.77	0	-1.42635	24.5091	163.179	449.793	181.833	3.31853	4.0505	251.187
10920	0	10	-7931.93	0	-1.23795	23.2711	162.875	449.946	182	3.15091	4.03525	251.187
10930	0	10	-7603.17	0	-1.07559	22.1955	162.504	450.075	182.167	3.00527	4.01681	251.187
10940	0	10	-7316.71	0	-0.935655	21.2599	162.074	450.182	182.333	2.87858	3.99573	251.187
10950	0	10	-7066.72	0	-0.815044	20.4448	161.594	450.27	182.5	2.76823	3.97244	251.187
10960	0	10	-6848.15	0	-0.711082	19.7337	161.072	450.343	182.667	2.67195	3.94734	251.187
10970	0	10	-6656.69	0	-0.621463	19.1123	160.515	450.401	182.833	2.5878	3.92075	251.187
10980	0	10	-6488.59	0	-0.544202	18.5681	159.927	450.447	183	2.51412	3.89297	251.187
10990	0	10	-6340.64	0	-0.477589	18.0905	159.314	450.481	183.167	2.44945	3.86423	251.187
11000	0	10	-6210.07	0	-0.420149	17.6703	158.68	450.507	183.333	2.39256	3.83474	251.187
11010	0	10	-6094.48	0	-0.370612	17.2997	158.028	450.524	183.5	2.34238	3.80468	251.187
11020	0	10	-5991.82	0	-0.327885	16.9718	157.362	450.534	183.667	2.29799	3.7742	251.187
11030	0	10	-5900.32	0	-0.291025	16.6808	156.684	450.537	183.833	2.25858	3.74343	251.187
11040	0	10	-5818.45	0	-0.25922	16.4216	155.996	450.534	184	2.22348	3.71247	251.187
11050	0	10	-5744.9	0	-0.23177	16.1898	155.3	450.527	184.167	2.1921	3.68144	251.187
11060	0	10	-5678.52	0	-0.208073	15.9817	154.598	450.514	184.333	2.16393	3.65039	251.187
11070	0	10	-5618.35	0	-0.187609	15.7941	153.892	450.498	184.5	2.13853	3.61941	251.187
11080	0	10	-5563.54	0	-0.169932	15.6242	153.182	450.478	184.667	2.11552	3.58854	251.187
11090	0	10	-5513.36	0	-0.154654	15.4695	152.47	450.454	184.833	2.09458	3.55784	251.187
11100	0	10	-5467.2	0	-0.141445	15.3281	151.756	450.428	185	2.07542	3.52734	251.187
11110	0	10	-5424.5	0	-0.130018	15.1981	151.042	450.399	185.167	2.05782	3.49707	251.187
11120	0	10	-5384.82	0	-0.120127	15.078	150.327	450.367	185.333	2.04156	3.46707	251.187
11130	0	10	-5347.74	0	-0.11156	14.9664	149.614	450.332	185.5	2.02645	3.43736	251.187
11140	0	10	-5312.93	0	-0.104133	14.8623	148.901	450.296	185.667	2.01235	3.40795	251.187
11150	0	10	-5280.08	0	-0.0976885	14.7646	148.19	450.258	185.833	1.99912	3.37886	251.187
11160	0	10	-5248.94	0	-0.0920913	14.6725	147.481	450.217	186	1.98665	3.3501	251.187
11170	0	10	-5219.29	0	-0.087224	14.5853	146.774	450.175	186.167	1.97484	3.32168	251.187
11180	0	10	-5190.94	0	-0.082986	14.5023	146.069	450.131	186.333	1.96361	3.2936	251.187
11190	0	10	-5163.73	0	-0.0792903	14.423	145.367	450.086	186.5	1.95287	3.26588	251.187
11200	0	10	-5137.51	0	-0.0760621	14.3469	144.667	450.039	186.667	1.94257	3.23851	251.187
11210	0	10	-5112.16	0	-0.0732369	14.2737	143.971	449.99	186.833	1.93266	3.2115	251.187
11220	0	10	-5087.58	0	-0.0707593	14.2029	143.278	449.94	187	1.92308	3.18484	251.187
11230	0	10	-5063.68	0	-0.0685813	14.1343	142.588	449.889	187.167	1.91379	3.15854	251.187
11240	0	10	-5040.37	0	-0.0666617	14.0677	141.901	449.836	187.333	1.90476	3.13259	251.187
11250	0	10	-5017.59	0	-0.064965	14.0027	141.218	449.783	187.5	1.89597	3.107	251.187
11260	0	10	-4995.29	0	-0.0634605	13.9393	140.538	449.727	187.667	1.88738	3.08176	251.187
11270	0	10	-4973.41	0	-0.062122	13.8771	139.862	449.671	187.833	1.87896	3.05686	251.187
11280	0	10	-4951.9	0	-0.0609267	13.8162	139.189	449.614	188	1.87071	3.03231	251.187
11290	0	10	-4930.74	0	-0.059855	13.7564	138.52	449.555	188.167	1.86261	3.0081	251.187
11300	0	10	-4909.89	0	-0.05889	13.6975	137.854	449.495	188.333	1.85464	2.98422	251.187
11310	0	20	-2418.71	0	-0.130101	13.5674	136.531	449.373	188.5	1.83702	2.96067	251.187
11330	0	20	-2397.83	0	-0.123037	13.4443	135.219	449.246	188.833	1.82036	2.91383	251.187
11350	0	20	-2377.65	0	-0.117593	13.3267	133.922	449.115	189.167	1.80444	2.86824	251.187
11370	0	20	-2358.01	0	-0.113327	13.2134	132.638	448.979	189.5	1.7891	2.82389	251.187
11390	0	20	-2338.84	0	-0.109917	13.1035	131.368	448.838	189.833	1.77421	2.78076	251.187
11410	0	20	-2320.06	0	-0.107132	12.9964	130.112	448.694	190.167	1.75971	2.73879	251.187
11430	0	20	-2301.62	0	-0.104803	12.8916	128.871	448.545	190.5	1.74552	2.69798	251.187
11450	0	20	-2283.47	0	-0.102807	12.7887	127.643	448.393	190.833	1.7316	2.65827	251.187
11470	0	20	-2265.59	0	-0.101058	12.6877	126.429	448.236	191.167	1.71791	2.61964	251.187
11490	0	20	-2247.97	0	-0.0994897	12.5882	125.23	448.076	191.5	1.70444	2.58205	251.187
11510	0	20	-2230.58	0	-0.0980566	12.4901	124.044	447.912	191.833	1.69117	2.54546	251.187
11530	0	20	-2213.41	0	-0.0967249	12.3934	122.871	447.745	192.167	1.67807	2.50984	251.187
11550	0	20	-2196.45	0	-0.0954702	12.298	121.713	447.574	192.5	1.66514	2.47517	251.187
11570	0	20	-2179.69	0	-0.0942745	12.2037	120.568	447.399	192.833	1.65238	2.4414	251.187
11590	0	20	-2163.14	0	-0.0931251	12.1106	119.436	447.221	193.167	1.63977	2.40851	251.187
11610	0	20	-2146.77	0	-0.0920125	12.0185	118.317	447.04	193.5	1.62731	2.37646	251.187
11630	0	20	-2130.6	0	-0.0909299	11.9276	117.211	446.855	193.833	1.615	2.34523	251.187
11650	0	20	-2114.62	0	-0.0898723	11.8377	116.118	446.666	194.167	1.60283	2.31479	251.187
11670	0	20	-2098.81	0	-0.0888361	11.7489	115.037	446.475	194.5	1.5908	2.2851	251.187
11690	0	20	-2083.19	0	-0.0878185	11.6611	113.969	446.28	194.833	1.57891	2.25616	251.187
11710	0	20	-2067.74	0	-0.0868176	11.5743	112.914	446.082	195.167	1.56716	2.22793	251.187
11730	0	20	-2052.47	0	-0.0858319	11.4884	111.87	445.881	195.5	1.55553	2.20038	251.187
11750	0	20	-2037.37	0	-0.0848604	11.4036	110.839	445.677	195.833	1.54404	2.1735	251.187
11770	0	20	-2022.44	0	-0.083902	11.3197	109.82	445.47	196.167	1.53268	2.14725	251.187
11790	0	20	-2007.68	0	-0.0829563	11.2367	108.812	445.259	196.5	1.52145	2.12163	251.187
11810	0	20	-1993.08	0	-0.0820227	11.1547	107.817	445.046	196.833	1.51034	2.09661	251.187
11830	0	20	-1978.65	0	-0.0811008	11.0736	106.832	444.83	197.167	1.49936	2.07217	251.187
11850	0	20	-1964.38	0	-0.0801904	10.9934	105.859	444.611	197.5	1.48851	2.04829	251.187
11870	0	20	-1950.27	0	-0.079291	10.9141	104.898	444.389	197.833	1.47777	2.02496	251.187
11890	0	20	-1936.31	0	-0.0784025	10.8357	103.947	444.164	198.167	1.46715	2.00214	251.187
11910	0	20	-1922.52	0	-0.0775247	10.7582	103.008	443.936	198.5	1.45666	1.97984	251.187
11930	0	20	-1908.88	0	-0.0766575	10.6815	102.079	443.706	198.833	1.44628	1.95803	251.187
11950	0	20	-1895.39	0	-0.0758006	10.6057	101.161	443.473	199.167	1.43601	1.9367	251.187
11970	0	20	-1882.05	0	-0.0749539	10.5308	100.254	443.237	199.5	1.42587	1.91582	251.187
11990	0	20	-1868.86	0	-0.0741172	10.4567	99.3567	442.999	199.833	1.41583	1.8954	251.187
12010	0	20	-1855.81	0	-0.0732905	10.3834	98.4702	442.758	200.167	1.40591	1.8754	251.187
12030	0	20	-1842.91	0	-0.0724736	10.3109	97.5939	442.515	200.5	1.39609	1.85583	251.187
12050	0	20	-1830.16	0	-0.0716664	10.2392	96.7276	442.269	200.833	1.38639	1.83667	251.187
12070	0	20	-1817.55	0	-0.0708687	10.1684	95.8714	442.02	201.167	1.37679	1.81789	251.187
12090	0	20	-1805.07	0	-0.0700805	10.0983	95.0251	441.769	201.5	1.36731	1.79951	251.187
12110	0	20	-1792.74	0	-0.0693016	10.029	94.1885	441.516	201.833	1.35792	1.78149	251.187
12130	0	20	-1780.54	0	-0.0685319	9.96044	93.3615	441.261	202.167	1.34864	1.76383	251.187
12150	0	20	-1768.48	0	-0.0677713	9.89267	92.5441	441.003	202.5	1.33947	1.74652	251.187
12170	0	20	-1756.55	0	-0.0670197	9.82565	91.7361	440.742	202.833	1.33039	1.72955	251.187
12190	0	20	-1744.76	0	-0.066277	9.75937	90.9373	440.48	203.167	1.32142	1.71291	251.187
12210	0	20	-1733.09	0	-0.065543	9.69383	90.1478	440.215	203.5	1.31254	1.69659	251.187
12230	0	20	-1721.55	0	-0.0648178	9.62901	89.3673	439.948	203.833	1.30377	1.68058	251.187
12250	0	20	-1710.15	0	-0.0641011	9.56491	88.5958	439.679	204.167	1.29509	1.66487	251.187
12270	0	20	-1698.86	0	-0.0633928	9.50152	87.8332	439.407	204.5	1.28651	1.64945	251.187
12290	0	20	-1687.7	0	-0.062693	9.43882	87.0793	439.134	204.833	1.27802	1.63432	251.187
12310	0	20	-1676.67	0	-0.0620014	9.37682	86.3341	438.858	205.167	1.26962	1.61947	251.187
12330	0	20	-1665.75	0	-0.061318	9.3155	85.5974	438.581	205.5	1.26132	1.60488	251.187
12350	0	20	-1654.96	0	-0.0606426	9.25486	84.8692	438.301	205.833	1.25311	1.59056	251.187
12370	0	20	-1644.28	0	-0.0599752	9.19489	84.1493	438.02	206.167	1.24499	1.57649	251.187
12390	0	20	-1633.73	0	-0.0593157	9.13557	83.4377	437.736	206.5	1.23696	1.56267	251.187
12410	0	20	-1623.28	0	-0.058664	9.07691	82.7342	437.451	206.833	1.22901	1.54909	251.187
12430	0	20	-1612.96	0	-0.05802	9.01889	82.0388	437.163	207.167	1.22116	1.53575	251.187
12450	0	20	-1602.74	0	-0.0573836	8.9615	81.3514	436.874	207.5	1.21339	1.52264	251.187
12470	0	20	-1592.64	0	-0.0567547	8.90475	80.6718	436.583	207.833	1.2057	1.50974	251.187
12490	0	20	-1582.65	0	-0.0561332	8.84861	80	436.29	208.167	1.1981	1.49707	251.187
12510	0	20	-1572.76	0	-0.0555191	8.7931	79.3359	435.995	208.5	1.19058	1.48461	251.187
12530	0	20	-1562.99	0	-0.0549122	8.73818	78.6794	435.699	208.833	1.18315	1.47235	251.187
12550	0	20	-1553.32	0	-0.0543125	8.68387	78.0303	435.4	209.167	1.1758	1.46029	251.187
12570	0	20	-1543.76	0	-0.0537198	8.63015	77.3887	435.1	209.5	1.16852	1.44843	251.187
12590	0	20	-1534.3	0	-0.0531342	8.57702	76.7544	434.799	209.833	1.16133	1.43676	251.187
12610	0	20	-1524.94	0	-0.0525554	8.52446	76.1274	434.495	210.167	1.15421	1.42528	251.187
12630	0	20	-1515.69	0	-0.0519835	8.47248	75.5075	434.19	210.5	1.14717	1.41398	251.187
12650	0	20	-1506.54	0	-0.0514183	8.42106	74.8946	433.884	210.833	1.14021	1.40286	251.187
12670	0	20	-1497.48	0	-0.0508598	8.3702	74.2888	433.576	211.167	1.13332	1.39191	251.187
12690	0	20	-1488.53	0	-0.0503079	8.31989	73.6898	433.266	211.5	1.12651	1.38113	251.187
12710	0	20	-1479.67	0	-0.0497625	8.27013	73.0977	432.955	211.833	1.11978	1.37051	251.187
12730	0	20	-1470.9	0	-0.0492235	8.22091	72.5123	432.642	212.167	1.11311	1.36006	251.187
12750	0	20	-1462.23	0	-0.0486909	8.17221	71.9335	432.328	212.5	1.10652	1.34976	251.187
12770	0	20	-1453.66	0	-0.0481646	8.12405	71.3614	432.012	212.833	1.1	1.33962	251.187
12790	0	20	-1445.18	0	-0.0476444	8.07641	70.7957	431.695	213.167	1.09355	1.32963	251.187
12810	0	20	-1436.79	0	-0.0471304	8.02928	70.2365	431.376	213.5	1.08716	1.31979	251.187
12830	0	20	-1428.49	0	-0.0466224	7.98265	69.6836	431.056	213.833	1.08085	1.31009	251.187
12850	0	20	-1420.27	0	-0.0461205	7.93653	69.137	430.735	214.167	1.07461	1.30054	251.187
12870	0	20	-1412.15	0	-0.0456244	7.89091	68.5966	430.412	214.5	1.06843	1.29112	251.187
12890	0	20	-1404.12	0	-0.0451342	7.84577	68.0623	430.088	214.833	1.06232	1.28183	251.187
12910	0	20	-1396.17	0	-0.0446498	7.80112	67.534	429.763	215.167	1.05627	1.27268	251.187
12930	0	20	-1388.3	0	-0.044171	7.75695	67.0118	429.436	215.5	1.05029	1.26366	251.187
12950	0	20	-1380.52	0	-0.043698	7.71326	66.4954	429.108	215.833	1.04437	1.25477	251.187
12970	0	20	-1372.82	0	-0.0432304	7.67002	65.9849	428.779	216.167	1.03852	1.24599	251.187
12990	0	20	-1365.21	0	-0.0427684	7.62726	65.4802	428.449	216.5	1.03273	1.23735	251.187
13010	0	20	-1357.67	0	-0.0423119	7.58494	64.9811	428.117	216.833	1.027	1.22882	251.187
13030	0	20	-1350.22	0	-0.0418607	7.54308	64.4877	427.785	217.167	1.02133	1.2204	251.187
13050	0	20	-1342.85	0	-0.0414148	7.50167	63.9999	427.451	217.5	1.01573	1.2121	251.187
13070	0	20	-1335.55	0	-0.0409741	7.46069	63.5176	427.116	217.833	1.01018	1.20392	251.187
13090	0	20	-1328.33	0	-0.0405387	7.42016	63.0407	426.779	218.167	1.00469	1.19584	251.187
13110	0	20	-1321.19	0	-0.0401084	7.38005	62.5692	426.442	218.5	0.999258	1.18787	251.187
13130	0	20	-1314.12	0	-0.0396831	7.34036	62.103	426.104	218.833	0.993885	1.18001	251.187
13150	0	20	-1307.13	0	-0.0392628	7.3011	61.642	425.764	219.167	0.988569	1.17225	251.187
13170	0	20	-1300.21	0	-0.0388475	7.26225	61.1862	425.424	219.5	0.983309	1.16459	251.187
13190	0	20	-1293.37	0	-0.0384371	7.22382	60.7356	425.082	219.833	0.978105	1.15703	251.187
13210	0	20	-1286.6	0	-0.0380315	7.18579	60.29	424.739	220.167	0.972955	1.14957	251.187
13230	0	20	-1279.89	0	-0.0376306	7.14816	59.8494	424.396	220.5	0.96786	1.14221	251.187
13250	0	20	-1273.26	0	-0.0372345	7.11092	59.4137	424.051	220.833	0.962818	1.13494	251.187
13270	0	20	-1266.7	0	-0.0368431	7.07408	58.983	423.706	221.167	0.95783	1.12777	251.187
13290	0	20	-1260.21	0	-0.0364562	7.03762	58.557	423.359	221.5	0.952894	1.12068	251.187
13310	0	20	-1253.79	0	-0.0360739	7.00155	58.1359	423.012	221.833	0.948009	1.11369	251.187
13330	0	20	-1247.43	0	-0.035696	6.96585	57.7194	422.663	222.167	0.943176	1.10678	251.187
13350	0	20	-1241.14	0	-0.0353227	6.93053	57.3076	422.314	222.5	0.938393	1.09996	251.187
13370	0	20	-1234.91	0	-0.0349537	6.89558	56.9005	421.964	222.833	0.933661	1.09322	251.187
13390	0	20	-1228.75	0	-0.034589	6.86099	56.4978	421.613	223.167	0.928977	1.08657	251.187
13410	0	20	-1222.66	0	-0.0342286	6.82676	56.0997	421.261	223.5	0.924343	1.08	251.187
13430	0	20	-1216.62	0	-0.0338725	6.79288	55.706	420.908	223.833	0.919756	1.07351	251.187
13450	0	20	-1210.65	0	-0.0335205	6.75936	55.3166	420.555	224.167	0.915218	1.0671	251.187
13470	0	20	-1204.74	0	-0.0331727	6.72619	54.9317	420.2	224.5	0.910726	1.06077	251.187
13490	0	20	-1198.9	0	-0.0328289	6.69336	54.551	419.845	224.833	0.906281	1.05452	251.187
13510	0	20	-1193.11	0	-0.0324892	6.66087	54.1745	419.489	225.167	0.901882	1.04834	251.187
13530	0	20	-1187.38	0	-0.0321535	6.62872	53.8022	419.133	225.5	0.897529	1.04223	251.187
13550	0	20	-1181.71	0	-0.0318217	6.5969	53.4341	418.775	225.833	0.89322	1.0362	251.187
13570	0	20	-1176.1	0	-0.0314938	6.5654	53.07	418.417	226.167	0.888956	1.03024	251.187
13590	0	20	-1170.55	0	-0.0311697	6.53424	52.71	418.058	226.5	0.884735	1.02435	251.187
13610	0	20	-1165.06	0	-0.0308495	6.50339	52.354	417.699	226.833	0.880558	1.01853	251.187
13630	0	20	-1159.62	0	-0.030533	6.47285	52.0019	417.339	227.167	0.876424	1.01278	251.187
13650	0	20	-1154.23	0	-0.0302202	6.44263	51.6537	416.978	227.5	0.872332	1.00709	251.187
13670	0	20	-1148.91	0	-0.0299111	6.41272	51.3094	416.616	227.833	0.868282	1.00147	251.187
13690	0	20	-1143.63	0	-0.0296056	6.38312	50.9689	416.254	228.167	0.864274	0.995921	251.187
13710	0	20	-1138.41	0	-0.0293037	6.35381	50.6321	415.891	228.5	0.860306	0.990433	251.187
13730	0	20	-1133.24	0	-0.0290053	6.32481	50.2991	415.527	228.833	0.856379	0.985008	251.187
13750	0	20	-1128.13	0	-0.0287104	6.2961	49.9697	415.163	229.167	0.852491	0.979645	251.187
13770	0	20	-1123.07	0	-0.028419	6.26768	49.6439	414.798	229.5	0.848643	0.974345	251.187
13790	0	20	-1118.05	0	-0.0281309	6.23955	49.3218	414.433	229.833	0.844834	0.969104	251.187
13810	0	20	-1113.09	0	-0.0278463	6.2117	49.0032	414.067	230.167	0.841064	0.963924	251.187
13830	0	20	-1108.18	0	-0.027565	6.18414	48.688	413.701	230.5	0.837332	0.958802	251.187
13850	0	20	-1103.32	0	-0.027287	6.15685	48.3764	413.334	230.833	0.833637	0.953738	251.187
13870	0	20	-1098.51	0	-0.0270122	6.12984	48.0681	412.966	231.167	0.82998	0.948731	251.187
13890	0	20	-1093.74	0	-0.0267406	6.1031	47.7633	412.598	231.5	0.826359	0.94378	251.187
13910	4	20	4228.55	4228.55	-0.0264723	6.07662	47.4618	412.23	231.833	0.822775	0.938885	253.537
13930	4	20	4.66952	4.66952	-0.026207	29.5424	47.1635	411.861	232.167	4.00004	0.934045	253.539
13950	4	20	2254.13	2254.13	-6.27458	23.2937	49.5894	412.423	232.5	3.15397	1.06186	254.792
13970	4	20	512.728	512.728	-4.56154	31.2551	51.2404	412.736	232.833	4.23195	1.14908	255.076
13990	4	20	1570.98	1570.98	-6.64461	27.459	53.7786	413.365	233.167	3.71795	1.2776	255.949
14010	4	20	813.308	813.308	-5.5815	30.6052	55.8236	413.843	233.5	4.14395	1.37934	256.401
14030	4	20	1290.47	1290.47	-6.37539	28.7482	58.1897	414.445	233.833	3.89251	1.49459	257.118
14050	4	20	951.824	951.824	-5.83165	30.0858	60.2909	414.972	234.167	4.07362	1.59456	257.647
14070	4	20	1161.87	1161.87	-6.14324	29.2305	62.5026	415.551	234.5	3.95781	1.69791	258.292
14090	4	20	1007.12	1007.12	-5.86917	29.8162	64.5685	416.095	234.833	4.03711	1.79212	258.852
14110	4	20	1096.87	1096.87	-5.98145	29.4298	66.6587	416.662	235.167	3.9848	1.88571	259.461
14130	4	20	1023.81	1023.81	-5.83465	29.6889	68.66	417.213	235.5	4.01988	1.97322	260.03
14150	4	20	1059.86	1059.86	-5.86139	29.5154	70.649	417.773	235.833	3.99638	2.05854	260.619
14170	4	20	1023.34	1023.34	-5.7733	29.6302	72.576	418.326	236.167	4.01193	2.13933	261.187
14190	4	20	1035.56	1035.56	-5.7632	29.5522	74.4755	418.882	236.5	4.00137	2.21739	261.763
14210	4	20	1015.48	1015.48	-5.70237	29.6029	76.326	419.434	236.833	4.00824	2.29177	262.327
14230	4	20	1017.22	1017.22	-5.67681	29.5677	78.1432	419.988	237.167	4.00346	2.36332	262.892
14250	4	20	1004.63	1004.63	-5.62906	29.5899	79.918	420.539	237.5	4.00647	2.4317	263.45
14270	4	20	1001.86	1001.86	-5.59746	29.5737	81.6579	421.091	237.833	4.00428	2.49735	264.007
14290	4	20	992.758	992.758	-5.55639	29.5832	83.3592	421.641	238.167	4.00556	2.56017	264.558
14310	4	20	988.109	988.109	-5.52294	29.5756	85.0256	422.19	238.5	4.00453	2.62043	265.107
14330	4	20	980.709	980.709	-5.48566	29.5794	86.656	422.738	238.833	4.00505	2.67813	265.652
14350	4	20	975.364	975.364	-5.45218	29.5756	88.2524	423.286	239.167	4.00453	2.73345	266.194
14370	4	20	968.86	968.86	-5.41737	29.5769	89.8147	423.833	239.5	4.00471	2.78644	266.732
14390	4	20	963.339	963.339	-5.38462	29.5748	91.3442	424.379	239.833	4.00443	2.83723	267.267
14410	4	20	957.365	957.365	-5.35166	29.5751	92.8411	424.924	240.167	4.00446	2.88589	267.799
14430	4	20	951.893	951.893	-5.31998	29.5738	94.3064	425.468	240.5	4.00429	2.93252	268.328
14450	4	20	946.281	946.281	-5.28855	29.5735	95.7407	426.012	240.833	4.00426	2.9772	268.854
14470	4	20	940.954	940.954	-5.25803	29.5726	97.1446	426.554	241.167	4.00413	3.02002	269.376
14490	4	20	935.624	935.624	-5.22797	29.5722	98.5188	427.096	241.5	4.00407	3.06104	269.896
14510	4	20	930.48	930.48	-5.19865	29.5714	99.8639	427.637	241.833	4.00397	3.10036	270.413
14530	4	20	925.391	925.391	-5.16986	29.5709	101.181	428.177	242.167	4.0039	3.13803	270.927
14550	4	20	920.441	920.441	-5.14171	29.5703	102.469	428.717	242.5	4.00381	3.17412	271.439
14570	4	20	915.57	915.57	-5.11411	29.5697	103.731	429.255	242.833	4.00374	3.20871	271.947
14590	4	20	910.815	910.815	-5.08709	29.5691	104.966	429.793	243.167	4.00366	3.24186	272.453
14610	4	20	906.147	906.147	-5.06062	29.5686	106.174	430.33	243.5	4.00358	3.27362	272.957
14630	4	20	901.582	901.582	-5.03471	29.568	107.357	430.866	243.833	4.00351	3.30405	273.457
14650	4	20	897.107	897.107	-5.00932	29.5675	108.516	431.401	244.167	4.00344	3.33321	273.956
14670	4	20	892.726	892.726	-4.98445	29.567	109.649	431.935	244.5	4.00337	3.36115	274.452
14690	4	20	888.433	888.433	-4.9601	29.5665	110.759	432.469	244.833	4.0033	3.38792	274.945
14710	4	20	884.23	884.23	-4.93624	29.566	111.845	433.002	245.167	4.00323	3.41358	275.437
14730	4	20	880.112	880.112	-4.91288	29.5655	112.908	433.534	245.5	4.00316	3.43816	275.926
14750	4	20	876.079	876.079	-4.88999	29.565	113.948	434.065	245.833	4.0031	3.46171	276.412
14770	4	20	872.128	872.128	-4.86757	29.5645	114.967	434.595	246.167	4.00304	3.48428	276.897
14790	4	20	868.258	868.258	-4.84561	29.5641	115.964	435.125	246.5	4.00297	3.50591	277.379
14810	4	20	864.467	864.467	-4.8241	29.5636	116.94	435.654	246.833	4.00291	3.52663	277.859
14830	4	20	860.754	860.754	-4.80304	29.5632	117.895	436.181	247.167	4.00285	3.54649	278.338
14850	4	20	857.116	857.116	-4.7824	29.5627	118.83	436.709	247.5	4.00279	3.56551	278.814
14870	4	20	853.553	853.553	-4.76218	29.5623	119.745	437.235	247.833	4.00274	3.58374	279.288
14890	4	20	850.063	850.063	-4.74237	29.5619	120.641	437.761	248.167	4.00268	3.60121	279.76
14910	4	20	846.643	846.643	-4.72297	29.5615	121.518	438.285	248.5	4.00263	3.61795	280.231
14930	4	20	843.293	843.293	-4.70397	29.5611	122.376	438.809	248.833	4.00257	3.63398	280.699
14950	4	20	840.012	840.012	-4.68535	29.5607	123.216	439.333	249.167	4.00252	3.64935	281.166
14970	4	20	836.797	836.797	-4.66711	29.5603	124.039	439.855	249.5	4.00247	3.66407	281.631
14990	4	20	833.647	833.647	-4.64924	29.56	124.844	440.377	249.833	4.00242	3.67818	282.094
15010	4	20	830.562	830.562	-4.63174	29.5596	125.632	440.897	250.167	4.00237	3.6917	282.555
15030	4	20	827.538	827.538	-4.61459	29.5593	126.403	441.417	250.5	4.00232	3.70465	283.015
15050	4	20	824.577	824.577	-4.59778	29.5589	127.158	441.937	250.833	4.00228	3.71706	283.473
15070	4	20	821.675	821.675	-4.58132	29.5586	127.897	442.455	251.167	4.00223	3.72895	283.93
15090	4	20	818.832	818.832	-4.56519	29.5582	128.62	442.973	251.5	4.00218	3.74034	284.384
15110	4	20	816.046	816.046	-4.54939	29.5579	129.328	443.49	251.833	4.00214	3.75126	284.838
15130	4	20	813.317	813.317	-4.53391	29.5576	130.021	444.006	252.167	4.0021	3.76172	285.29
15150	4	20	810.642	810.642	-4.51874	29.5573	130.7	444.521	252.5	4.00205	3.77174	285.74
15170	4	20	808.022	808.022	-4.50387	29.557	131.364	445.036	252.833	4.00201	3.78134	286.189
15190	4	20	805.454	805.454	-4.48931	29.5567	132.014	445.55	253.167	4.00197	3.79054	286.636
15210	4	20	802.938	802.938	-4.47504	29.5564	132.65	446.063	253.5	4.00193	3.79935	287.082
15230	4	20	800.473	800.473	-4.46105	29.5561	133.273	446.575	253.833	4.00189	3.8078	287.527
15250	4	20	798.057	798.057	-4.44735	29.5558	133.882	447.087	254.167	4.00186	3.81589	287.971
15270	4	20	795.689	795.689	-4.43392	29.5555	134.479	447.597	254.5	4.00182	3.82364	288.413
15290	4	20	793.369	793.369	-4.42076	29.5553	135.063	448.107	254.833	4.00178	3.83107	288.853
15310	4	20	791.096	791.096	-4.40787	29.555	135.634	448.616	255.167	4.00175	3.83819	289.293
15330	4	20	788.867	788.867	-4.39523	29.5547	136.194	449.125	255.5	4.00171	3.84501	289.731
15350	4	20	786.684	786.684	-4.38285	29.5545	136.742	449.633	255.833	4.00168	3.85154	290.168
15370	4	20	784.544	784.544	-4.37071	29.5542	137.278	450.139	256.167	4.00164	3.8578	290.604
15390	4	20	782.446	782.446	-4.35882	29.554	137.803	450.646	256.5	4.00161	3.86379	291.039
15410	4	20	780.39	780.39	-4.34716	29.5538	138.316	451.151	256.833	4.00158	3.86954	291.472
15430	4	20	778.376	778.376	-4.33573	29.5535	138.819	451.656	257.167	4.00155	3.87504	291.905
15450	4	20	776.401	776.401	-4.32454	29.5533	139.311	452.16	257.5	4.00152	3.88032	292.336
15470	4	20	774.465	774.465	-4.31356	29.5531	139.793	452.663	257.833	4.00149	3.88537	292.766
15490	4	20	772.568	772.568	-4.3028	29.5529	140.264	453.165	258.167	4.00146	3.89021	293.195
15510	4	20	770.708	770.708	-4.29226	29.5526	140.726	453.667	258.5	4.00143	3.89485	293.624
15530	4	20	768.885	768.885	-4.28192	29.5524	141.178	454.168	258.833	4.0014	3.89929	294.051
15550	4	20	767.098	767.098	-4.27179	29.5522	141.62	454.668	259.167	4.00137	3.90355	294.477
15570	4	20	765.346	765.346	-4.26185	29.552	142.053	455.167	259.5	4.00134	3.90763	294.902
15590	4	20	763.628	763.628	-4.25212	29.5518	142.477	455.666	259.833	4.00132	3.91153	295.326
15610	4	20	761.945	761.945	-4.24257	29.5516	142.891	456.164	260.167	4.00129	3.91528	295.75
15630	4	20	760.294	760.294	-4.23321	29.5515	143.297	456.661	260.5	4.00127	3.91886	296.172
15650	4	20	758.676	758.676	-4.22404	29.5513	143.695	457.157	260.833	4.00124	3.9223	296.594
15670	4	20	757.089	757.089	-4.21504	29.5511	144.084	457.653	261.167	4.00122	3.92559	297.014
15690	4	20	755.533	755.533	-4.20623	29.5509	144.464	458.148	261.5	4.00119	3.92874	297.434
15710	4	20	754.008	754.008	-4.19758	29.5507	144.837	458.642	261.833	4.00117	3.93176	297.853
15730	4	20	752.512	752.512	-4.1891	29.5506	145.202	459.135	262.167	4.00115	3.93466	298.271
15750	4	20	751.046	751.046	-4.18079	29.5504	145.559	459.628	262.5	4.00113	3.93743	298.688
15770	4	20	749.608	749.608	-4.17264	29.5503	145.908	460.12	262.833	4.0011	3.94008	299.105
15790	4	20	748.197	748.197	-4.16465	29.5501	146.25	460.611	263.167	4.00108	3.94263	299.52
15810	4	20	746.814	746.814	-4.15681	29.5499	146.585	461.102	263.5	4.00106	3.94506	299.935
15830	4	20	745.458	745.458	-4.14912	29.5498	146.913	461.591	263.833	4.00104	3.9474	300.349
15850	4	20	744.128	744.128	-4.14158	29.5496	147.234	462.08	264.167	4.00102	3.94964	300.763
15870	4	20	742.824	742.824	-4.13419	29.5495	147.548	462.569	264.5	4.001	3.95178	301.175
15890	4	20	741.544	741.544	-4.12694	29.5494	147.855	463.056	264.833	4.00098	3.95383	301.587
15910	4	20	740.289	740.289	-4.11983	29.5492	148.156	463.543	265.167	4.00096	3.9558	301.999
15930	4	20	739.058	739.058	-4.11285	29.5491	148.451	464.029	265.5	4.00094	3.95768	302.409
15950	4	20	737.851	737.851	-4.10601	29.5489	148.739	464.515	265.833	4.00093	3.95948	302.819
15970	4	20	736.666	736.666	-4.0993	29.5488	149.021	464.999	266.167	4.00091	3.96121	303.228
15990	4	20	735.504	735.504	-4.09272	29.5487	149.297	465.483	266.5	4.00089	3.96286	303.637
16010	4	20	734.365	734.365	-4.08626	29.5486	149.568	465.966	266.833	4.00087	3.96445	304.045
16030	4	20	733.246	733.246	-4.07993	29.5484	149.832	466.449	267.167	4.00086	3.96597	304.452
16050	4	20	732.149	732.149	-4.07371	29.5483	150.091	466.931	267.5	4.00084	3.96742	304.859
16070	4	20	731.073	731.073	-4.06761	29.5482	150.345	467.412	267.833	4.00083	3.96882	305.265
16090	4	20	730.017	730.017	-4.06163	29.5481	150.593	467.892	268.167	4.00081	3.97015	305.671
16110	4	20	728.98	728.98	-4.05576	29.548	150.836	468.372	268.5	4.00079	3.97143	306.076
16130	4	20	727.964	727.964	-4.05	29.5479	151.074	468.851	268.833	4.00078	3.97265	306.48
16150	4	20	726.966	726.966	-4.04435	29.5478	151.307	469.329	269.167	4.00077	3.97383	306.884
16170	4	20	725.986	725.986	-4.0388	29.5476	151.534	469.806	269.5	4.00075	3.97495	307.287
16190	4	20	725.025	725.025	-4.03336	29.5475	151.757	470.283	269.833	4.00074	3.97602	307.69
16210	4	20	724.082	724.082	-4.02802	29.5474	151.976	470.759	270.167	4.00072	3.97705	308.092
16230	4	20	723.157	723.157	-4.02278	29.5473	152.189	471.235	270.5	4.00071	3.97804	308.494
16250	4	20	722.248	722.248	-4.01763	29.5472	152.399	471.709	270.833	4.0007	3.97899	308.895
16270	4	20	721.356	721.356	-4.01258	29.5472	152.603	472.183	271.167	4.00068	3.97989	309.296
16290	4	20	720.481	720.481	-4.00763	29.5471	152.804	472.656	271.5	4.00067	3.98076	309.696
16310	4	20	719.621	719.621	-4.00276	29.547	153	473.129	271.833	4.00066	3.98159	310.096
16330	4	20	718.778	718.778	-3.99799	29.5469	153.192	473.601	272.167	4.00065	3.98238	310.496
16350	4	20	717.949	717.949	-3.9933	29.5468	153.38	474.072	272.5	4.00063	3.98314	310.894
16370	4	20	717.136	717.136	-3.98869	29.5467	153.564	474.542	272.833	4.00062	3.98387	311.293
16390	4	20	716.338	716.338	-3.98417	29.5466	153.744	475.012	273.167	4.00061	3.98457	311.691
16410	4	20	715.554	715.554	-3.97974	29.5465	153.92	475.481	273.5	4.0006	3.98524	312.088
16430	4	20	714.784	714.784	-3.97538	29.5465	154.093	475.949	273.833	4.00059	3.98588	312.485
16450	4	20	714.028	714.028	-3.9711	29.5464	154.261	476.417	274.167	4.00058	3.98649	312.882
16470	4	20	713.285	713.285	-3.9669	29.5463	154.427	476.884	274.5	4.00057	3.98708	313.278
16490	4	20	712.556	712.556	-3.96277	29.5462	154.589	477.35	274.833	4.00056	3.98764	313.674
16510	4	20	711.84	711.84	-3.95872	29.5462	154.747	477.816	275.167	4.00055	3.98818	314.07
16530	4	20	711.136	711.136	-3.95474	29.5461	154.902	478.281	275.5	4.00054	3.9887	314.465
16550	4	20	710.445	710.445	-3.95083	29.546	155.054	478.745	275.833	4.00053	3.98919	314.86
16570	4	20	709.766	709.766	-3.94699	29.5459	155.202	479.208	276.167	4.00052	3.98966	315.254
16590	4	20	709.099	709.099	-3.94321	29.5459	155.348	479.671	276.5	4.00051	3.99012	315.648
16610	4	20	708.444	708.444	-3.93951	29.5458	155.49	480.133	276.833	4.0005	3.99055	316.041
16630	4	20	707.8	707.8	-3.93586	29.5457	155.629	480.595	277.167	4.00049	3.99096	316.435
16650	4	20	707.168	707.168	-3.93229	29.5457	155.766	481.055	277.5	4.00048	3.99136	316.827
16670	4	20	706.546	706.546	-3.92877	29.5456	155.899	481.516	277.833	4.00048	3.99174	317.22
16690	4	20	705.935	705.935	-3.92532	29.5456	156.03	481.975	278.167	4.00047	3.99211	317.612
16710	4	20	705.335	705.335	-3.92192	29.5455	156.158	482.434	278.5	4.00046	3.99246	318.004
16730	4	20	704.745	704.745	-3.91859	29.5454	156.283	482.892	278.833	4.00045	3.99279	318.396
16750	4	20	704.165	704.165	-3.91531	29.5454	156.405	483.349	279.167	4.00044	3.99311	318.787
16770	4	20	703.595	703.595	-3.91208	29.5453	156.525	483.806	279.5	4.00044	3.99341	319.178
16790	4	20	703.034	703.034	-3.90891	29.5453	156.642	484.262	279.833	4.00043	3.99371	319.568
16810	4	20	702.483	702.483	-3.9058	29.5452	156.757	484.717	280.167	4.00042	3.99399	319.958
16830	4	20	701.942	701.942	-3.90274	29.5452	156.87	485.171	280.5	4.00041	3.99426	320.348
16850	4	20	701.409	701.409	-3.89973	29.5451	156.98	485.625	280.833	4.00041	3.99451	320.738
16870	4	20	700.886	700.886	-3.89677	29.5451	157.088	486.079	281.167	4.0004	3.99476	321.127
16890	4	20	700.371	700.371	-3.89386	29.545	157.193	486.531	281.5	4.00039	3.99499	321.517
16910	4	20	699.864	699.864	-3.891	29.545	157.296	486.983	281.833	4.00039	3.99522	321.905
16930	4	20	699.366	699.366	-3.88818	29.5449	157.397	487.434	282.167	4.00038	3.99543	322.294
16950	4	20	698.876	698.876	-3.88541	29.5449	157.496	487.885	282.5	4.00037	3.99564	322.682
16970	4	20	698.394	698.394	-3.88269	29.5448	157.593	488.335	282.833	4.00037	3.99584	323.07
16990	4	20	697.92	697.92	-3.88001	29.5448	157.688	488.784	283.167	4.00036	3.99603	323.458
17010	4	20	697.454	697.454	-3.87738	29.5447	157.781	489.233	283.5	4.00036	3.99621	323.845
17030	4	20	696.995	696.995	-3.87479	29.5447	157.872	489.681	283.833	4.00035	3.99638	324.233
17050	4	20	696.544	696.544	-3.87224	29.5447	157.96	490.128	284.167	4.00035	3.99655	324.62
17070	4	20	696.1	696.1	-3.86973	29.5446	158.047	490.575	284.5	4.00034	3.9967	325.006
17090	4	20	695.662	695.662	-3.86726	29.5446	158.133	491.02	284.833	4.00033	3.99686	325.393
17110	4	20	695.232	695.232	-3.86483	29.5445	158.216	491.466	285.167	4.00033	3.997	325.779
17130	4	20	694.809	694.809	-3.86244	29.5445	158.298	491.91	285.5	4.00032	3.99714	326.165
17150	4	20	694.392	694.392	-3.86009	29.5445	158.377	492.354	285.833	4.00032	3.99727	326.551
17170	4	20	693.981	693.981	-3.85777	29.5444	158.456	492.798	286.167	4.00031	3.9974	326.936
17190	4	20	693.577	693.577	-3.85549	29.5444	158.532	493.24	286.5	4.00031	3.99752	327.322
17210	4	20	693.18	693.18	-3.85324	29.5443	158.607	493.682	286.833	4.0003	3.99764	327.707
17230	4	20	692.788	692.788	-3.85103	29.5443	158.68	494.123	287.167	4.0003	3.99775	328.092
17250	4	20	692.402	692.402	-3.84886	29.5443	158.752	494.564	287.5	4.00029	3.99785	328.476
17270	4	20	692.022	692.022	-3.84671	29.5442	158.822	495.004	287.833	4.00029	3.99796	328.861
17290	4	20	691.648	691.648	-3.8446	29.5442	158.891	495.443	288.167	4.00029	3.99805	329.245
17310	4	20	691.28	691.28	-3.84252	29.5442	158.958	495.882	288.5	4.00028	3.99815	329.629
17330	4	20	690.917	690.917	-3.84047	29.5442	159.024	496.32	288.833	4.00028	3.99824	330.013
17350	4	20	690.559	690.559	-3.83846	29.5441	159.089	496.758	289.167	4.00027	3.99832	330.397
17370	4	20	690.207	690.207	-3.83647	29.5441	159.152	497.194	289.5	4.00027	3.9984	330.78
17390	4	20	689.86	689.86	-3.83451	29.5441	159.214	497.63	289.833	4.00027	3.99848	331.163
17410	4	20	689.518	689.518	-3.83258	29.544	159.274	498.066	290.167	4.00026	3.99855	331.546
17430	4	20	689.181	689.181	-3.83068	29.544	159.333	498.501	290.5	4.00026	3.99863	331.929
17450	4	20	688.848	688.848	-3.82881	29.544	159.391	498.935	290.833	4.00025	3.99869	332.312
17470	4	20	688.521	688.521	-3.82696	29.5439	159.448	499.368	291.167	4.00025	3.99876	332.694
17490	4	20	688.198	688.198	-3.82514	29.5439	159.504	499.801	291.5	4.00025	3.99882	333.077
17510	4	20	687.88	687.88	-3.82335	29.5439	159.558	500.234	291.833	4.00024	3.99888	333.459
17530	4	20	687.566	687.566	-3.82158	29.5439	159.611	500.665	292.167	4.00024	3.99894	333.841
17550	4	20	687.256	687.256	-3.81984	29.5438	159.663	501.096	292.5	4.00024	3.99899	334.223
17570	4	20	686.951	686.951	-3.81812	29.5438	159.714	501.526	292.833	4.00023	3.99904	334.604
17590	4	20	686.65	686.65	-3.81642	29.5438	159.764	501.956	293.167	4.00023	3.99909	334.986
17610	4	20	686.354	686.354	-3.81475	29.5438	159.813	502.385	293.5	4.00023	3.99914	335.367
17630	4	20	686.061	686.061	-3.8131	29.5438	159.861	502.814	293.833	4.00022	3.99919	335.748
17650	4	20	685.772	685.772	-3.81147	29.5437	159.907	503.241	294.167	4.00022	3.99923	336.129
17670	4	20	685.487	685.487	-3.80987	29.5437	159.953	503.668	294.5	4.00022	3.99927	336.51
17690	4	20	685.206	685.206	-3.80828	29.5437	159.998	504.095	294.833	4.00021	3.99931	336.891
17710	4	20	684.929	684.929	-3.80672	29.5437	160.042	504.521	295.167	4.00021	3.99935	337.271
17730	4	20	684.655	684.655	-3.80518	29.5436	160.085	504.946	295.5	4.00021	3.99938	337.652
17750	4	20	684.385	684.385	-3.80366	29.5436	160.127	505.371	295.833	4.00021	3.99942	338.032
17770	4	20	684.118	684.118	-3.80216	29.5436	160.168	505.795	296.167	4.0002	3.99945	338.412
17790	4	20	683.854	683.854	-3.80067	29.5436	160.208	506.218	296.5	4.0002	3.99948	338.792
17810	4	20	683.595	683.595	-3.79921	29.5436	160.248	506.641	296.833	4.0002	3.99951	339.172
17830	4	20	683.338	683.338	-3.79777	29.5435	160.286	507.063	297.167	4.0002	3.99954	339.551
17850	4	20	683.084	683.084	-3.79634	29.5435	160.324	507.484	297.5	4.00019	3.99957	339.931
17870	4	20	682.834	682.834	-3.79493	29.5435	160.361	507.905	297.833	4.00019	3.99959	340.31
17890	4	20	682.587	682.587	-3.79354	29.5435	160.397	508.325	298.167	4.00019	3.99962	340.689
17910	4	20	682.343	682.343	-3.79217	29.5435	160.433	508.745	298.5	4.00019	3.99964	341.068
17930	4	20	682.102	682.102	-3.79081	29.5435	160.467	509.164	298.833	4.00018	3.99967	341.447
17950	4	20	681.863	681.863	-3.78947	29.5434	160.501	509.582	299.167	4.00018	3.99969	341.826
17970	4	20	681.628	681.628	-3.78815	29.5434	160.534	510	299.5	4.00018	3.99971	342.205
17990	4	20	681.395	681.395	-3.78684	29.5434	160.567	510.417	299.833	4.00018	3.99973	342.583
18010	4	20	681.165	681.165	-3.78554	29.5434	160.599	510.834	300.167	4.00018	3.99975	342.962
18030	4	20	680.938	680.938	-3.78427	29.5434	160.63	511.25	300.5	4.00017	3.99976	343.34
18050	4	20	680.714	680.714	-3.783	29.5434	160.66	511.665	300.833	4.00017	3.99978	343.718
18070	4	20	680.492	680.492	-3.78176	29.5434	160.69	512.08	301.167	4.00017	3.9998	344.096
18090	4	20	680.272	680.272	-3.78052	29.5433	160.719	512.494	301.5	4.00017	3.99981	344.474
18110	4	20	680.055	680.055	-3.7793	29.5433	160.748	512.907	301.833	4.00017	3.99983	344.852
18130	4	20	679.841	679.841	-3.7781	29.5433	160.776	513.32	302.167	4.00016	3.99984	345.23
18150	4	20	679.628	679.628	-3.77691	29.5433	160.803	513.732	302.5	4.00016	3.99985	345.607
18170	4	20	679.419	679.419	-3.77573	29.5433	160.83	514.144	302.833	4.00016	3.99987	345.985
18190	4	20	679.211	679.211	-3.77456	29.5433	160.857	514.555	303.167	4.00016	3.99988	346.362
18210	4	20	679.006	679.006	-3.77341	29.5433	160.882	514.965	303.5	4.00016	3.99989	346.739
18230	4	20	678.802	678.802	-3.77227	29.5432	160.907	515.375	303.833	4.00015	3.9999	347.116
18250	4	20	678.602	678.602	-3.77114	29.5432	160.932	515.784	304.167	4.00015	3.99991	347.493
18270	4	20	678.403	678.403	-3.77002	29.5432	160.956	516.192	304.5	4.00015	3.99992	347.87
18290	4	20	678.206	678.206	-3.76892	29.5432	160.98	516.6	304.833	4.00015	3.99993	348.247
18310	4	20	678.011	678.011	-3.76782	29.5432	161.003	517.008	305.167	4.00015	3.99994	348.624
18330	4	20	677.818	677.818	-3.76674	29.5432	161.025	517.414	305.5	4.00015	3.99995	349
18350	4	20	677.627	677.627	-3.76567	29.5432	161.048	517.821	305.833	4.00015	3.99996	349.377
18370	4	20	677.439	677.439	-3.76461	29.5432	161.069	518.226	306.167	4.00014	3.99997	349.753
18390	4	20	677.251	677.251	-3.76356	29.5432	161.09	518.631	306.5	4.00014	3.99997	350.129
18410	4	20	677.066	677.066	-3.76252	29.5431	161.111	519.035	306.833	4.00014	3.99998	350.506
18430	4	20	676.883	676.883	-3.76149	29.5431	161.131	519.439	307.167	4.00014	3.99999	350.882
18450	4	20	676.701	676.701	-3.76047	29.5431	161.151	519.842	307.5	4.00014	3.99999	351.258
18470	4	20	676.521	676.521	-3.75946	29.5431	161.171	520.245	307.833	4.00014	4	351.633
18490	4	20	676.343	676.343	-3.75846	29.5431	161.19	520.647	308.167	4.00014	4.00001	352.009
18510	4	20	676.167	676.167	-3.75747	29.5431	161.208	521.048	308.5	4.00013	4.00001	352.385
18530	4	20	675.992	675.992	-3.75649	29.5431	161.227	521.449	308.833	4.00013	4.00002	352.76
18550	4	20	675.818	675.818	-3.75552	29.5431	161.245	521.849	309.167	4.00013	4.00002	353.136
18570	4	20	675.647	675.647	-3.75456	29.5431	161.262	522.249	309.5	4.00013	4.00003	353.511
18590	4	20	675.476	675.476	-3.7536	29.5431	161.279	522.648	309.833	4.00013	4.00003	353.886
18610	4	20	675.308	675.308	-3.75266	29.543	161.296	523.046	310.167	4.00013	4.00003	354.262
18630	4	20	675.141	675.141	-3.75172	29.543	161.312	523.444	310.5	4.00013	4.00004	354.637
18650	4	20	674.975	674.975	-3.75079	29.543	161.328	523.841	310.833	4.00013	4.00004	355.012
18670	4	20	674.811	674.811	-3.74987	29.543	161.344	524.238	311.167	4.00012	4.00005	355.387
18690	4	20	674.648	674.648	-3.74896	29.543	161.359	524.634	311.5	4.00012	4.00005	355.761
18710	4	20	674.486	674.486	-3.74805	29.543	161.375	525.029	311.833	4.00012	4.00005	356.136
18730	4	20	674.326	674.326	-3.74715	29.543	161.389	525.424	312.167	4.00012	4.00005	356.511
18750	4	20	674.167	674.167	-3.74626	29.543	161.404	525.818	312.5	4.00012	4.00006	356.885
18770	4	20	674.009	674.009	-3.74538	29.543	161.418	526.212	312.833	4.00012	4.00006	357.26
18790	4	20	673.853	673.853	-3.7445	29.543	161.432	526.605	313.167	4.00012	4.00006	357.634
18810	4	20	673.698	673.698	-3.74364	29.543	161.445	526.998	313.5	4.00012	4.00006	358.008
18830	4	20	673.544	673.544	-3.74277	29.543	161.458	527.39	313.833	4.00012	4.00007	358.383
18850	4	20	673.392	673.392	-3.74192	29.543	161.471	527.781	314.167	4.00012	4.00007	358.757
18870	4	20	673.24	673.24	-3.74107	29.543	161.484	528.172	314.5	4.00011	4.00007	359.131
18890	4	20	673.09	673.09	-3.74023	29.5429	161.496	528.562	314.833	4.00011	4.00007	359.505
18910	4	20	672.941	672.941	-3.7394	29.5429	161.509	528.952	315.167	4.00011	4.00007	359.878
18930	4	20	672.793	672.793	-3.73857	29.5429	161.52	529.341	315.5	4.00011	4.00008	360.252
18950	4	20	672.646	672.646	-3.73774	29.5429	161.532	529.729	315.833	4.00011	4.00008	360.626
18970	4	20	672.5	672.5	-3.73693	29.5429	161.543	530.117	316.167	4.00011	4.00008	361
18990	4	20	672.355	672.355	-3.73612	29.5429	161.555	530.504	316.5	4.00011	4.00008	361.373
19010	4	20	672.211	672.211	-3.73531	29.5429	161.566	530.891	316.833	4.00011	4.00008	361.746
19030	4	20	672.069	672.069	-3.73451	29.5429	161.576	531.277	317.167	4.00011	4.00008	362.12
19050	4	20	671.927	671.927	-3.73372	29.5429	161.587	531.663	317.5	4.00011	4.00008	362.493
19070	4	20	671.786	671.786	-3.73293	29.5429	161.597	532.048	317.833	4.00011	4.00008	362.866
19090	4	20	671.646	671.646	-3.73215	29.5429	161.607	532.432	318.167	4.00011	4.00009	363.24
19110	4	20	671.508	671.508	-3.73137	29.5429	161.617	532.816	318.5	4.00011	4.00009	363.613
19130	4	20	671.37	671.37	-3.7306	29.5429	161.626	533.2	318.833	4.0001	4.00009	363.986
19150	4	20	671.233	671.233	-3.72984	29.5429	161.636	533.582	319.167	4.0001	4.00009	364.358
19170	4	20	671.096	671.096	-3.72907	29.5429	161.645	533.965	319.5	4.0001	4.00009	364.731
19190	4	20	670.961	670.961	-3.72832	29.5429	161.654	534.346	319.833	4.0001	4.00009	365.104
19210	4	20	670.827	670.827	-3.72757	29.5429	161.663	534.727	320.167	4.0001	4.00009	365.477
19230	4	20	670.693	670.693	-3.72682	29.5428	161.671	535.108	320.5	4.0001	4.00009	365.849
19250	4	20	670.561	670.561	-3.72608	29.5428	161.68	535.488	320.833	4.0001	4.00009	366.222
19270	4	20	670.429	670.429	-3.72534	29.5428	161.688	535.867	321.167	4.0001	4.00009	366.594
19290	4	20	670.298	670.298	-3.72461	29.5428	161.696	536.246	321.5	4.0001	4.00009	366.967
19310	4	20	670.167	670.167	-3.72388	29.5428	161.704	536.624	321.833	4.0001	4.00009	367.339
19330	4	20	670.038	670.038	-3.72316	29.5428	161.712	537.002	322.167	4.0001	4.00009	367.711
19350	4	20	669.909	669.909	-3.72244	29.5428	161.719	537.379	322.5	4.0001	4.00009	368.083
19370	4	20	669.781	669.781	-3.72172	29.5428	161.727	537.756	322.833	4.0001	4.00009	368.456
19390	4	20	669.654	669.654	-3.72101	29.5428	161.734	538.132	323.167	4.0001	4.00009	368.828
19410	4	20	669.527	669.527	-3.7203	29.5428	161.741	538.507	323.5	4.0001	4.00009	369.2
19430	4	20	669.401	669.401	-3.7196	29.5428	161.748	538.882	323.833	4.0001	4.00009	369.571
19450	4	20	669.276	669.276	-3.7189	29.5428	161.755	539.256	324.167	4.00009	4.00009	369.943
19470	4	20	669.152	669.152	-3.71821	29.5428	161.762	539.63	324.5	4.00009	4.00009	370.315
19490	4	20	669.028	669.028	-3.71751	29.5428	161.768	540.003	324.833	4.00009	4.00009	370.687
19510	4	20	668.905	668.905	-3.71683	29.5428	161.775	540.376	325.167	4.00009	4.00009	371.058
19530	4	20	668.783	668.783	-3.71614	29.5428	161.781	540.748	325.5	4.00009	4.00009	371.43
19550	4	20	668.661	668.661	-3.71546	29.5428	161.787	541.12	325.833	4.00009	4.00009	371.801
19570	4	20	668.54	668.54	-3.71479	29.5428	161.793	541.491	326.167	4.00009	4.00009	372.173
19590	4	20	668.419	668.419	-3.71411	29.5428	161.799	541.861	326.5	4.00009	4.00009	372.544
19610	4	20	668.299	668.299	-3.71344	29.5428	161.805	542.231	326.833	4.00009	4.00009	372.915
19630	4	20	668.18	668.18	-3.71278	29.5428	161.81	542.601	327.167	4.00009	4.00009	373.287
19650	4	20	668.061	668.061	-3.71211	29.5428	161.816	542.969	327.5	4.00009	4.00009	373.658
19670	4	20	667.943	667.943	-3.71145	29.5428	161.821	543.338	327.833	4.00009	4.00009	374.029
19690	4	20	667.825	667.825	-3.7108	29.5428	161.826	543.705	328.167	4.00009	4.00009	374.4
19710	4	20	667.708	667.708	-3.71014	29.5428	161.832	544.073	328.5	4.00009	4.00009	374.771
19730	4	20	667.592	667.592	-3.70949	29.5428	161.837	544.439	328.833	4.00009	4.00009	375.142
19750	4	20	667.476	667.476	-3.70885	29.5427	161.842	544.805	329.167	4.00009	4.00009	375.512
19770	4	20	667.36	667.36	-3.7082	29.5427	161.846	545.171	329.5	4.00009	4.00009	375.883
19790	4	20	667.246	667.246	-3.70756	29.5427	161.851	545.536	329.833	4.00009	4.00009	376.254
19810	4	20	667.131	667.131	-3.70692	29.5427	161.856	545.901	330.167	4.00009	4.00009	376.625
19830	4	20	667.017	667.017	-3.70629	29.5427	161.86	546.265	330.5	4.00009	4.00009	376.995
19850	4	20	666.904	666.904	-3.70565	29.5427	161.865	546.628	330.833	4.00009	4.00009	377.366
19870	4	20	666.791	666.791	-3.70503	29.5427	161.869	546.991	331.167	4.00009	4.00009	377.736
19890	4	20	666.679	666.679	-3.7044	29.5427	161.873	547.353	331.5	4.00008	4.00009	378.106
19910	4	20	666.567	666.567	-3.70377	29.5427	161.878	547.715	331.833	4.00008	4.00009	378.477
19930	4	20	666.456	666.456	-3.70315	29.5427	161.882	548.076	332.167	4.00008	4.00009	378.847
19950	4	20	666.345	666.345	-3.70253	29.5427	161.886	548.437	332.5	4.00008	4.00009	379.217
19970	4	20	666.234	666.234	-3.70192	29.5427	161.89	548.797	332.833	4.00008	4.00009	379.587
19990	4	20	666.124	666.124	-3.7013	29.5427	161.893	549.157	333.167	4.00008	4.00009	379.957
20010	4	20	666.015	666.015	-3.70069	29.5427	161.897	549.516	333.5	4.00008	4.00009	380.327
20030	4	20	665.905	665.905	-3.70008	29.5427	161.901	549.875	333.833	4.00008	4.00009	380.697
20050	4	20	665.797	665.797	-3.69948	29.5427	161.904	550.233	334.167	4.00008	4.00009	381.067
20070	4	20	665.688	665.688	-3.69887	29.5427	161.908	550.59	334.5	4.00008	4.00009	381.437
20090	4	20	665.581	665.581	-3.69827	29.5427	161.911	550.947	334.833	4.00008	4.00009	381.807
20110	4	20	665.473	665.473	-3.69767	29.5427	161.915	551.304	335.167	4.00008	4.00009	382.177
20130	4	20	665.366	665.366	-3.69707	29.5427	161.918	551.66	335.5	4.00008	4.00009	382.546
20150	4	20	665.259	665.259	-3.69648	29.5427	161.921	552.015	335.833	4.00008	4.00009	382.916
20170	4	20	665.153	665.153	-3.69589	29.5427	161.924	552.37	336.167	4.00008	4.00009	383.285
20190	4	20	665.047	665.047	-3.6953	29.5427	161.927	552.724	336.5	4.00008	4.00009	383.655
20210	4	20	664.942	664.942	-3.69471	29.5427	161.93	553.078	336.833	4.00008	4.00009	384.024
20230	4	20	664.837	664.837	-3.69412	29.5427	161.933	553.432	337.167	4.00008	4.00009	384.394
20250	4	20	664.732	664.732	-3.69354	29.5427	161.936	553.784	337.5	4.00008	4.00009	384.763
20270	4	20	664.628	664.628	-3.69296	29.5427	161.939	554.137	337.833	4.00008	4.00009	385.132
20290	4	20	664.524	664.524	-3.69238	29.5427	161.942	554.488	338.167	4.00008	4.00009	385.501
20310	4	20	664.42	664.42	-3.6918	29.5427	161.945	554.84	338.5	4.00008	4.00008	385.87
20330	4	20	664.317	664.317	-3.69122	29.5427	161.947	555.19	338.833	4.00008	4.00008	386.239
20350	4	20	664.214	664.214	-3.69065	29.5427	161.95	555.541	339.167	4.00008	4.00008	386.608
20370	4	20	664.111	664.111	-3.69008	29.5427	161.952	555.89	339.5	4.00008	4.00008	386.977
20390	4	20	664.009	664.009	-3.68951	29.5427	161.955	556.24	339.833	4.00008	4.00008	387.346
20410	4	20	663.907	663.907	-3.68894	29.5427	161.957	556.588	340.167	4.00008	4.00008	387.715
20430	4	20	663.805	663.805	-3.68837	29.5427	161.96	556.936	340.5	4.00008	4.00008	388.084
20450	4	20	663.704	663.704	-3.68781	29.5427	161.962	557.284	340.833	4.00008	4.00008	388.453
20470	4	20	663.603	663.603	-3.68725	29.5427	161.964	557.631	341.167	4.00008	4.00008	388.821
20490	4	20	663.503	663.503	-3.68669	29.5427	161.967	557.978	341.5	4.00008	4.00008	389.19
20510	4	20	663.402	663.402	-3.68613	29.5427	161.969	558.324	341.833	4.00008	4.00008	389.558
20530	4	20	663.302	663.302	-3.68557	29.5427	161.971	558.669	342.167	4.00008	4.00008	389.927
20550	4	20	663.203	663.203	-3.68501	29.5427	161.973	559.014	342.5	4.00008	4.00008	390.295
20570	4	20	663.103	663.103	-3.68446	29.5427	161.975	559.359	342.833	4.00007	4.00008	390.664
20590	4	20	663.004	663.004	-3.68391	29.5427	161.977	559.703	343.167	4.00007	4.00008	391.032
20610	4	20	662.905	662.905	-3.68336	29.5427	161.979	560.046	343.5	4.00007	4.00008	391.4
20630	4	20	662.807	662.807	-3.68281	29.5427	161.981	560.389	343.833	4.00007	4.00008	391.769
20650	4	20	662.709	662.709	-3.68226	29.5426	161.983	560.732	344.167	4.00007	4.00008	392.137
20670	4	20	662.611	662.611	-3.68172	29.5426	161.985	561.074	344.5	4.00007	4.00008	392.505
20690	4	20	662.513	662.513	-3.68117	29.5426	161.987	561.415	344.833	4.00007	4.00008	392.873
20710	4	20	662.416	662.416	-3.68063	29.5426	161.988	561.756	345.167	4.00007	4.00008	393.241
20730	4	20	662.319	662.319	-3.68009	29.5426	161.99	562.097	345.5	4.00007	4.00008	393.609
20750	4	20	662.222	662.222	-3.67955	29.5426	161.992	562.437	345.833	4.00007	4.00008	393.977
20770	4	20	662.125	662.125	-3.67901	29.5426	161.993	562.776	346.167	4.00007	4.00008	394.345
20790	4	20	662.029	662.029	-3.67848	29.5426	161.995	563.115	346.5	4.00007	4.00008	394.712
20810	4	20	661.933	661.933	-3.67794	29.5426	161.997	563.454	346.833	4.00007	4.00008	395.08
20830	4	20	661.837	661.837	-3.67741	29.5426	161.998	563.792	347.167	4.00007	4.00008	395.448
20850	4	20	661.742	661.742	-3.67688	29.5426	162	564.129	347.5	4.00007	4.00008	395.816
20870	4	20	661.647	661.647	-3.67634	29.5426	162.001	564.466	347.833	4.00007	4.00008	396.183
20890	4	20	661.552	661.552	-3.67582	29.5426	162.003	564.803	348.167	4.00007	4.00008	396.551
20910	4	20	661.457	661.457	-3.67529	29.5426	162.004	565.139	348.5	4.00007	4.00008	396.918
20930	4	20	661.362	661.362	-3.67476	29.5426	162.005	565.474	348.833	4.00007	4.00008	397.286
20950	4	20	661.268	661.268	-3.67424	29.5426	162.007	565.809	349.167	4.00007	4.00008	397.653
20970	4	20	661.174	661.174	-3.67371	29.5426	162.008	566.144	349.5	4.00007	4.00008	398.02
20990	4	20	661.08	661.08	-3.67319	29.5426	162.01	566.478	349.833	4.00007	4.00008	398.388
21010	4	20	660.987	660.987	-3.67267	29.5426	162.011	566.811	350.167	4.00007	4.00008	398.755
21030	4	20	660.893	660.893	-3.67215	29.5426	162.012	567.144	350.5	4.00007	4.00008	399.122
21050	4	20	660.8	660.8	-3.67163	29.5426	162.013	567.477	350.833	4.00007	4.00008	399.489
21070	4	20	660.707	660.707	-3.67111	29.5426	162.014	567.809	351.167	4.00007	4.00008	399.856
21090	4	20	660.615	660.615	-3.6706	29.5426	162.016	568.14	351.5	4.00007	4.00008	400.223
21110	4	20	660.522	660.522	-3.67008	29.5426	162.017	568.471	351.833	4.00007	4.00007	400.59
21130	4	20	660.43	660.43	-3.66957	29.5426	162.018	568.802	352.167	4.00007	4.00007	400.957
21150	4	20	660.338	660.338	-3.66906	29.5426	162.019	569.132	352.5	4.00007	4.00007	401.324
21170	4	20	660.246	660.246	-3.66855	29.5426	162.02	569.461	352.833	4.00007	4.00007	401.691
21190	4	20	660.155	660.155	-3.66804	29.5426	162.021	569.791	353.167	4.00007	4.00007	402.057
21210	4	20	660.064	660.064	-3.66753	29.5426	162.022	570.119	353.5	4.00007	4.00007	402.424
21230	4	20	659.973	659.973	-3.66702	29.5426	162.023	570.447	353.833	4.00007	4.00007	402.791
[truncated: 173 more rows]

## Sheet: Marsh TCI
TCI
Time(sec)	Target	Sec	Inf(mg/hr)	Pump inf(mg/hr)	A1 change	A1	A2	A3	Time(min)	Concentration	Cum Vol
0	4	1	12000	12000	0	0	0	0	0	0	0.333333
1	4	1	292205	12000	0	3.33333	0	0	0.0166667	0.164268	0.666667
2	4	1	280259	12000	-0.0151608	6.65151	0.00622222	0.00233333	0.0333333	0.32779	1
3	4	1	268368	12000	-0.0302469	9.95459	0.0186327	0.00698926	0.05	0.490567	1.33333
4	4	1	256531	12000	-0.0452585	13.2427	0.0371975	0.0139571	0.0666667	0.652605	1.66667
5	4	1	244748	12000	-0.0601961	16.5158	0.061883	0.0232262	0.0833333	0.813907	2
6	4	1	233018	12000	-0.0750601	19.7741	0.0926558	0.034786	0.1	0.974477	2.33333
7	4	1	221342	12000	-0.0898507	23.0176	0.129482	0.0486259	0.116667	1.13432	2.66667
8	4	1	209718	12000	-0.104568	26.2463	0.17233	0.0647355	0.133333	1.29343	3
9	4	1	198147	12000	-0.119213	29.4604	0.221165	0.0831044	0.15	1.45183	3.33333
10	4	1	186629	12000	-0.133786	32.66	0.275955	0.103722	0.166667	1.6095	3.66667
11	4	1	175163	12000	-0.148287	35.845	0.336668	0.126578	0.183333	1.76646	4
12	4	3	54972.9	12000	-0.487776	45.3573	0.536474	0.201832	0.2	2.23523	5
15	4	5	26523.5	12000	-1.02739	60.9965	0.95735	0.360527	0.25	3.00594	6.66667
20	4	5	15517.4	12000	-1.38054	76.2827	1.52226	0.573916	0.333333	3.75925	8.33333	Marsh Bolus	272
25	4	5	4759.43	12000	-1.72499	91.2243	2.22726	0.840747	0.416667	4.49558	10	Bolus Duration	82
30	4	5	-5756.67	12000	-2.06097	105.83	3.06848	1.1598	0.5	5.21536	11.6667
35	4	5	-16036.8	12000	-2.38869	120.108	4.04216	1.52989	0.583333	5.91898	13.3333
40	4	5	-26086.8	12000	-2.70834	134.066	5.14464	1.94984	0.666667	6.60686	15
45	4	5	-35912.3	12000	-3.02014	147.713	6.37235	2.41854	0.75	7.27936	16.6667
50	4	5	-45518.8	12000	-3.32427	161.055	7.72179	2.93487	0.833333	7.93689	18.3333
55	4	5	-54911.8	12000	-3.62093	174.101	9.18959	3.49776	0.916667	8.57979	20
60	4	5	-64096.4	12000	-3.9103	186.857	10.7724	4.10615	1	9.20843	21.6667
65	4	5	-73077.7	12000	-4.19256	199.331	12.467	4.75902	1.08333	9.82316	23.3333
70	4	5	-81860.8	12000	-4.46789	211.53	14.2703	5.45537	1.16667	10.4243	25
75	4	5	-90450.6	12000	-4.73646	223.46	16.1792	6.19423	1.25	11.0122	26.6667
80	4	5	-98851.7	4800	-4.99843	225.129	18.1907	6.97464	1.33333	11.0945	27.3333
85	4	5	-100032	0	-5.02692	220.102	20.2085	7.76067	1.41667	10.8467	27.3333
90	4	5	-96501.9	0	-4.90336	215.198	22.1702	8.52889	1.5	10.6051	27.3333
95	4	5	-93058.3	0	-4.78286	210.416	24.0771	9.27974	1.58333	10.3694	27.3333
100	4	5	-89699.2	0	-4.66535	205.75	25.9306	10.0136	1.66667	10.1395	27.3333
105	4	5	-86422.7	0	-4.55076	201.199	27.7321	10.731	1.75	9.91521	27.3333
110	4	5	-83226.6	0	-4.43901	196.76	29.4828	11.4323	1.83333	9.69645	27.3333
115	4	5	-80108.9	0	-4.33004	192.43	31.1841	12.1178	1.91667	9.48307	27.3333
120	4	5	-77067.8	0	-4.22377	188.207	32.8372	12.788	2	9.27492	27.3333
125	4	5	-74101.3	0	-4.12014	184.087	34.4433	13.4432	2.08333	9.07188	27.3333
130	4	5	-71207.6	0	-4.01908	180.067	36.0036	14.0838	2.16667	8.87381	27.3333
135	4	5	-68384.8	0	-3.92053	176.147	37.5192	14.7101	2.25	8.68061	27.3333
140	4	5	-65631.2	0	-3.82442	172.322	38.9913	15.3226	2.33333	8.49214	27.3333
145	4	5	-62945.1	0	-3.7307	168.592	40.4209	15.9215	2.41667	8.30829	27.3333
150	4	5	-60324.8	0	-3.6393	164.952	41.8092	16.5072	2.5	8.12894	27.3333
155	4	5	-57768.7	0	-3.55017	161.402	43.1571	17.08	2.58333	7.95399	27.3333
160	4	5	-55275.2	0	-3.46325	157.939	44.4657	17.6402	2.66667	7.78332	27.3333
165	4	5	-52842.7	0	-3.37849	154.561	45.736	18.1881	2.75	7.61682	27.3333
170	4	5	-50469.7	0	-3.29583	151.265	46.969	18.7241	2.83333	7.4544	27.3333
175	4	5	-48154.7	0	-3.21522	148.05	48.1655	19.2484	2.91667	7.29596	27.3333
180	4	5	-45896.3	0	-3.13661	144.913	49.3265	19.7613	3	7.14138	27.3333
185	4	5	-43693.2	0	-3.05995	141.853	50.453	20.263	3.08333	6.99059	27.3333
190	4	5	-41543.8	0	-2.9852	138.868	51.5457	20.7539	3.16667	6.84347	27.3333
195	4	5	-39447	0	-2.91229	135.955	52.6055	21.2343	3.25	6.69995	27.3333
200	4	5	-37401.3	0	-2.8412	133.114	53.6334	21.7043	3.33333	6.55994	27.3333
205	4	5	-35405.6	0	-2.77187	130.342	54.6299	22.1642	3.41667	6.42334	27.3333
210	4	5	-33458.5	0	-2.70426	127.638	55.5961	22.6143	3.5	6.29007	27.3333
215	4	5	-31558.9	0	-2.63832	125	56.5325	23.0548	3.58333	6.16005	27.3333
220	4	5	-29705.6	0	-2.57402	122.426	57.4401	23.486	3.66667	6.03321	27.3333
225	4	5	-27897.5	0	-2.51131	119.914	58.3195	23.908	3.75	5.90945	27.3333
230	4	5	-26133.4	0	-2.45016	117.464	59.1714	24.3211	3.83333	5.7887	27.3333
235	4	5	-24412.2	0	-2.39053	115.074	59.9965	24.7256	3.91667	5.67089	27.3333
240	4	5	-22732.9	0	-2.33237	112.741	60.7956	25.1215	4	5.55595	27.3333
245	4	5	-21094.4	0	-2.27566	110.466	61.5692	25.5092	4.08333	5.44381	27.3333
250	4	5	-19495.7	0	-2.22035	108.245	62.318	25.8888	4.16667	5.33439	27.3333
255	4	5	-17935.9	0	-2.16642	106.079	63.0426	26.2606	4.25	5.22763	27.3333
260	4	5	-16414	0	-2.11382	103.965	63.7438	26.6246	4.33333	5.12346	27.3333
265	4	5	-14929	0	-2.06252	101.903	64.422	26.9812	4.41667	5.02181	27.3333
270	4	5	-13480	0	-2.0125	99.8902	65.0778	27.3304	4.5	4.92264	27.3333
275	4	5	-12066.1	0	-1.96371	97.9265	65.7118	27.6725	4.58333	4.82586	27.3333
280	4	5	-10686.5	0	-1.91614	96.0103	66.3246	28.0077	4.66667	4.73144	27.3333
285	4	5	-9340.25	0	-1.86974	94.1406	66.9167	28.336	4.75	4.63929	27.3333
290	4	5	-8026.62	0	-1.82449	92.3161	67.4887	28.6577	4.83333	4.54938	27.3333
295	4	5	-6744.75	0	-1.78037	90.5357	68.041	28.9729	4.91667	4.46165	27.3333
300	4	5	-5493.87	0	-1.73734	88.7984	68.5741	29.2818	5	4.37603	27.3333
305	4	5	-4273.2	0	-1.69537	87.103	69.0886	29.5846	5.08333	4.29248	27.3333
310	4	5	-3082	0	-1.65445	85.4486	69.5849	29.8813	5.16667	4.21095	27.3333
315	4	5	-1919.54	0	-1.61453	83.834	70.0635	30.1721	5.25	4.13138	27.3333
320	4	5	-785.098	0	-1.57561	82.2584	70.5248	30.4573	5.33333	4.05374	27.3333
325	4	5	322.01	322.01	-1.53765	81.168	70.9693	30.7368	5.41667	4	27.3781
330	4	5	1087.77	1087.77	-1.51079	81.168	71.4016	31.0124	5.5	4	27.5291
335	4	5	1086.29	1086.29	-1.50874	81.168	71.8319	31.288	5.58333	4	27.68
340	4	5	1084.82	1084.82	-1.5067	81.168	72.2603	31.5635	5.66667	4	27.8307
345	4	5	1083.36	1083.36	-1.50467	81.168	72.6866	31.8389	5.75	4	27.9811
350	4	5	1081.91	1081.91	-1.50265	81.168	73.1111	32.1142	5.83333	4	28.1314
355	4	5	1080.46	1080.46	-1.50064	81.168	73.5335	32.3895	5.91667	4	28.2815
360	4	5	1079.02	1079.02	-1.49863	81.168	73.9541	32.6647	6	4	28.4313
365	4	5	1077.58	1077.58	-1.49664	81.168	74.3727	32.9398	6.08333	4	28.581
370	4	5	1076.15	1076.15	-1.49465	81.168	74.7894	33.2148	6.16667	4	28.7305
375	4	5	1074.73	1074.73	-1.49268	81.168	75.2042	33.4897	6.25	4	28.8797
380	4	5	1073.31	1073.31	-1.49071	81.168	75.617	33.7646	6.33333	4	29.0288
385	4	5	1071.9	1071.9	-1.48875	81.168	76.028	34.0394	6.41667	4	29.1777
390	4	5	1070.5	1070.5	-1.4868	81.168	76.4371	34.3141	6.5	4	29.3264
395	4	5	1069.1	1069.1	-1.48486	81.168	76.8444	34.5888	6.58333	4	29.4748
400	4	5	1067.7	1067.7	-1.48292	81.168	77.2497	34.8634	6.66667	4	29.6231
405	4	5	1066.32	1066.32	-1.481	81.168	77.6532	35.1379	6.75	4	29.7712
410	4	5	1064.94	1064.94	-1.47908	81.168	78.0549	35.4123	6.83333	4	29.9191
415	4	5	1063.57	1063.57	-1.47717	81.168	78.4547	35.6867	6.91667	4	30.0669
420	4	5	1062.2	1062.2	-1.47527	81.168	78.8527	35.9609	7	4	30.2144
425	4	5	1060.84	1060.84	-1.47338	81.168	79.2489	36.2351	7.08333	4	30.3617
430	4	5	1059.48	1059.48	-1.4715	81.168	79.6432	36.5092	7.16667	4	30.5089
435	4	5	1058.13	1058.13	-1.46963	81.168	80.0357	36.7833	7.25	4	30.6558
440	4	5	1056.79	1056.79	-1.46776	81.168	80.4265	37.0573	7.33333	4	30.8026
445	4	5	1055.45	1055.45	-1.4659	81.168	80.8154	37.3312	7.41667	4	30.9492
450	4	5	1054.12	1054.12	-1.46405	81.168	81.2026	37.605	7.5	4	31.0956
455	4	5	1052.79	1052.79	-1.46221	81.168	81.588	37.8787	7.58333	4	31.2418
460	4	5	1051.47	1051.47	-1.46038	81.168	81.9716	38.1524	7.66667	4	31.3879
465	4	5	1050.16	1050.16	-1.45855	81.168	82.3535	38.426	7.75	4	31.5337
470	4	5	1048.85	1048.85	-1.45673	81.168	82.7336	38.6995	7.83333	4	31.6794
475	4	5	1047.55	1047.55	-1.45492	81.168	83.112	38.973	7.91667	4	31.8249
480	4	5	1046.25	1046.25	-1.45312	81.168	83.4886	39.2463	8	4	31.9702
485	4	5	1044.96	1044.96	-1.45133	81.168	83.8635	39.5196	8.08333	4	32.1153
490	4	5	1043.67	1043.67	-1.44954	81.168	84.2367	39.7929	8.16667	4	32.2603
495	4	5	1042.39	1042.39	-1.44777	81.168	84.6082	40.066	8.25	4	32.4051
500	4	5	1041.12	1041.12	-1.446	81.168	84.978	40.3391	8.33333	4	32.5497
505	4	5	1039.85	1039.85	-1.44423	81.168	85.346	40.6121	8.41667	4	32.6941
510	4	5	1038.59	1038.59	-1.44248	81.168	85.7124	40.885	8.5	4	32.8383
515	4	5	1037.33	1037.33	-1.44073	81.168	86.0772	41.1578	8.58333	4	32.9824
520	4	5	1036.08	1036.08	-1.43899	81.168	86.4402	41.4306	8.66667	4	33.1263
525	4	5	1034.83	1034.83	-1.43726	81.168	86.8016	41.7033	8.75	4	33.27
530	4	5	1033.59	1033.59	-1.43554	81.168	87.1613	41.9759	8.83333	4	33.4136
535	4	5	1032.35	1032.35	-1.43382	81.168	87.5194	42.2485	8.91667	4	33.557
540	4	5	1031.12	1031.12	-1.43211	81.168	87.8758	42.5209	9	4	33.7002
545	4	5	1029.9	1029.9	-1.43041	81.168	88.2306	42.7933	9.08333	4	33.8432
550	4	5	1028.68	1028.68	-1.42872	81.168	88.5838	43.0656	9.16667	4	33.9861
555	4	5	1027.46	1027.46	-1.42703	81.168	88.9354	43.3379	9.25	4	34.1288
560	4	5	1026.26	1026.26	-1.42535	81.168	89.2853	43.6101	9.33333	4	34.2713
565	4	5	1025.05	1025.05	-1.42368	81.168	89.6337	43.8822	9.41667	4	34.4137
570	4	5	1023.85	1023.85	-1.42202	81.168	89.9804	44.1542	9.5	4	34.5559
575	4	5	1022.66	1022.66	-1.42036	81.168	90.3256	44.4261	9.58333	4	34.6979
580	4	5	1021.47	1021.47	-1.41871	81.168	90.6692	44.698	9.66667	4	34.8398
585	4	5	1020.29	1020.29	-1.41707	81.168	91.0112	44.9698	9.75	4	34.9815
590	4	5	1019.11	1019.11	-1.41544	81.168	91.3516	45.2415	9.83333	4	35.1231
595	4	5	1017.94	1017.94	-1.41381	81.168	91.6905	45.5132	9.91667	4	35.2644
600	4	5	1016.77	1016.77	-1.41219	81.168	92.0278	45.7847	10	4	35.4057
605	4	5	1015.61	1015.61	-1.41057	81.168	92.3636	46.0562	10.0833	4	35.5467
610	4	5	1014.46	1014.46	-1.40897	81.168	92.6978	46.3276	10.1667	4	35.6876
615	4	5	1013.3	1013.3	-1.40737	81.168	93.0305	46.599	10.25	4	35.8284
620	4	5	1012.16	1012.16	-1.40578	81.168	93.3617	46.8703	10.3333	4	35.9689
625	4	5	1011.02	1011.02	-1.40419	81.168	93.6913	47.1415	10.4167	4	36.1094
630	4	5	1009.88	1009.88	-1.40261	81.168	94.0195	47.4126	10.5	4	36.2496
635	4	5	1008.75	1008.75	-1.40104	81.168	94.3461	47.6836	10.5833	4	36.3897
640	4	5	1007.62	1007.62	-1.39947	81.168	94.6713	47.9546	10.6667	4	36.5297
645	4	5	1006.5	1006.5	-1.39792	81.168	94.9949	48.2255	10.75	4	36.6695
650	4	5	1005.38	1005.38	-1.39637	81.168	95.3171	48.4963	10.8333	4	36.8091
655	4	5	1004.27	1004.27	-1.39482	81.168	95.6378	48.7671	10.9167	4	36.9486
660	4	5	1003.16	1003.16	-1.39328	81.168	95.957	49.0378	11	4	37.0879
665	4	5	1002.06	1002.06	-1.39175	81.168	96.2748	49.3084	11.0833	4	37.2271
670	4	5	1000.96	1000.96	-1.39023	81.168	96.5911	49.5789	11.1667	4	37.3661
675	4	5	999.872	999.872	-1.38871	81.168	96.906	49.8494	11.25	4	37.505
680	4	5	998.784	998.784	-1.3872	81.168	97.2194	50.1197	11.3333	4	37.6437
685	4	5	997.701	997.701	-1.3857	81.168	97.5314	50.39	11.4167	4	37.7823
690	4	5	996.623	996.623	-1.3842	81.168	97.8419	50.6603	11.5	4	37.9207
695	4	5	995.549	995.549	-1.38271	81.168	98.151	50.9304	11.5833	4	38.059
700	4	5	994.48	994.48	-1.38122	81.168	98.4587	51.2005	11.6667	4	38.1971
705	4	5	993.416	993.416	-1.37974	81.168	98.765	51.4705	11.75	4	38.3351
710	4	5	992.356	992.356	-1.37827	81.168	99.0699	51.7404	11.8333	4	38.4729
715	4	5	991.301	991.301	-1.37681	81.168	99.3734	52.0103	11.9167	4	38.6106
720	4	5	990.251	990.251	-1.37535	81.168	99.6755	52.2801	12	4	38.7481
725	4	5	989.205	989.205	-1.3739	81.168	99.9763	52.5498	12.0833	4	38.8855
730	4	5	988.164	988.164	-1.37245	81.168	100.276	52.8194	12.1667	4	39.0227
735	4	5	987.127	987.127	-1.37101	81.168	100.574	53.089	12.25	4	39.1598
740	4	5	986.095	986.095	-1.36958	81.168	100.87	53.3585	12.3333	4	39.2968
745	4	5	985.068	985.068	-1.36815	81.168	101.165	53.6279	12.4167	4	39.4336
750	4	5	984.044	984.044	-1.36673	81.168	101.459	53.8972	12.5	4	39.5703
755	4	5	983.026	983.026	-1.36531	81.168	101.752	54.1665	12.5833	4	39.7068
760	4	5	982.011	982.011	-1.3639	81.168	102.043	54.4357	12.6667	4	39.8432
765	4	5	981.002	981.002	-1.3625	81.168	102.333	54.7048	12.75	4	39.9794
770	4	5	979.996	979.996	-1.36111	81.168	102.621	54.9739	12.8333	4	40.1156
775	4	5	978.995	978.995	-1.35972	81.168	102.909	55.2428	12.9167	4	40.2515
780	4	5	977.998	977.998	-1.35833	81.168	103.195	55.5117	13	4	40.3874
785	4	5	977.006	977.006	-1.35695	81.168	103.479	55.7806	13.0833	4	40.5231
790	4	5	976.018	976.018	-1.35558	81.168	103.762	56.0493	13.1667	4	40.6586
795	4	5	975.034	975.034	-1.35421	81.168	104.044	56.318	13.25	4	40.794
800	4	5	974.055	974.055	-1.35285	81.168	104.325	56.5866	13.3333	4	40.9293
805	4	5	973.079	973.079	-1.3515	81.168	104.605	56.8551	13.4167	4	41.0645
810	4	5	972.108	972.108	-1.35015	81.168	104.883	57.1236	13.5	4	41.1995
815	4	5	971.142	971.142	-1.34881	81.168	105.16	57.3919	13.5833	4	41.3344
820	4	5	970.179	970.179	-1.34747	81.168	105.435	57.6602	13.6667	4	41.4691
825	4	5	969.221	969.221	-1.34614	81.168	105.709	57.9285	13.75	4	41.6037
830	4	5	968.266	968.266	-1.34481	81.168	105.983	58.1966	13.8333	4	41.7382
835	4	5	967.316	967.316	-1.3435	81.168	106.254	58.4647	13.9167	4	41.8726
840	4	5	966.37	966.37	-1.34218	81.168	106.525	58.7327	14	4	42.0068
845	4	5	965.429	965.429	-1.34087	81.168	106.794	59.0007	14.0833	4	42.1409
850	4	5	964.491	964.491	-1.33957	81.168	107.062	59.2685	14.1667	4	42.2748
855	4	5	963.557	963.557	-1.33827	81.168	107.329	59.5363	14.25	4	42.4087
860	4	5	962.628	962.628	-1.33698	81.168	107.595	59.804	14.3333	4	42.5423
865	4	5	961.702	961.702	-1.3357	81.168	107.859	60.0717	14.4167	4	42.6759
870	4	5	960.78	960.78	-1.33442	81.168	108.123	60.3392	14.5	4	42.8094
875	4	5	959.863	959.863	-1.33314	81.168	108.385	60.6067	14.5833	4	42.9427
880	4	5	958.949	958.949	-1.33187	81.168	108.645	60.8742	14.6667	4	43.0759
885	4	5	958.04	958.04	-1.33061	81.168	108.905	61.1415	14.75	4	43.2089
890	4	5	957.134	957.134	-1.32935	81.168	109.163	61.4088	14.8333	4	43.3419
895	4	5	956.232	956.232	-1.3281	81.168	109.421	61.676	14.9167	4	43.4747
900	4	5	955.334	955.334	-1.32685	81.168	109.677	61.9431	15	4	43.6074
905	4	5	954.44	954.44	-1.32561	81.168	109.932	62.2102	15.0833	4	43.7399
910	4	5	953.55	953.55	-1.32438	81.168	110.185	62.4771	15.1667	4	43.8724
915	4	5	952.664	952.664	-1.32314	81.168	110.438	62.744	15.25	4	44.0047
920	4	5	951.781	951.781	-1.32192	81.168	110.689	63.0109	15.3333	4	44.1369
925	4	5	950.903	950.903	-1.3207	81.168	110.939	63.2776	15.4167	4	44.2689
930	4	5	950.028	950.028	-1.31948	81.168	111.189	63.5443	15.5	4	44.4009
935	4	5	949.157	949.157	-1.31827	81.168	111.436	63.8109	15.5833	4	44.5327
940	4	5	948.29	948.29	-1.31707	81.168	111.683	64.0775	15.6667	4	44.6644
945	4	5	947.426	947.426	-1.31587	81.168	111.929	64.3439	15.75	4	44.796
950	4	5	946.566	946.566	-1.31468	81.168	112.174	64.6103	15.8333	4	44.9275
955	4	5	945.71	945.71	-1.31349	81.168	112.417	64.8767	15.9167	4	45.0588
960	4	5	944.858	944.858	-1.3123	81.168	112.659	65.1429	16	4	45.19
965	4	5	944.009	944.009	-1.31112	81.168	112.901	65.4091	16.0833	4	45.3212
970	4	5	943.164	943.164	-1.30995	81.168	113.141	65.6752	16.1667	4	45.4522
975	4	5	942.323	942.323	-1.30878	81.168	113.38	65.9412	16.25	4	45.583
980	4	5	941.485	941.485	-1.30762	81.168	113.618	66.2072	16.3333	4	45.7138
985	4	5	940.651	940.651	-1.30646	81.168	113.854	66.473	16.4167	4	45.8444
990	4	5	939.82	939.82	-1.30531	81.168	114.09	66.7388	16.5	4	45.975
995	4	5	938.993	938.993	-1.30416	81.168	114.325	67.0046	16.5833	4	46.1054
1000	4	5	938.17	938.17	-1.30301	81.168	114.558	67.2702	16.6667	4	46.2357
1005	4	5	937.35	937.35	-1.30187	81.168	114.791	67.5358	16.75	4	46.3659
1010	4	5	936.534	936.534	-1.30074	81.168	115.022	67.8014	16.8333	4	46.4959
1015	4	5	935.721	935.721	-1.29961	81.168	115.253	68.0668	16.9167	4	46.6259
1020	4	5	934.911	934.911	-1.29849	81.168	115.482	68.3322	17	4	46.7558
1025	4	5	934.106	934.106	-1.29737	81.168	115.71	68.5975	17.0833	4	46.8855
1030	4	5	933.303	933.303	-1.29625	81.168	115.937	68.8627	17.1667	4	47.0151
1035	4	5	932.504	932.504	-1.29514	81.168	116.164	69.1278	17.25	4	47.1446
1040	4	5	931.709	931.709	-1.29404	81.168	116.389	69.3929	17.3333	4	47.274
1045	4	5	930.917	930.917	-1.29294	81.168	116.613	69.6579	17.4167	4	47.4033
1050	4	5	930.128	930.128	-1.29184	81.168	116.836	69.9228	17.5	4	47.5325
1055	4	5	929.343	929.343	-1.29075	81.168	117.058	70.1877	17.5833	4	47.6616
1060	4	5	928.561	928.561	-1.28967	81.168	117.279	70.4525	17.6667	4	47.7906
1065	4	5	927.782	927.782	-1.28859	81.168	117.499	70.7172	17.75	4	47.9194
1070	4	5	927.007	927.007	-1.28751	81.168	117.718	70.9818	17.8333	4	48.0482
1075	4	5	926.235	926.235	-1.28644	81.168	117.936	71.2464	17.9167	4	48.1768
1080	4	5	925.467	925.467	-1.28537	81.168	118.153	71.5109	18	4	48.3053
1085	4	5	924.702	924.702	-1.28431	81.168	118.369	71.7753	18.0833	4	48.4338
1090	4	5	923.94	923.94	-1.28325	81.168	118.584	72.0397	18.1667	4	48.5621
1095	4	5	923.181	923.181	-1.2822	81.168	118.798	72.304	18.25	4	48.6903
1100	4	5	922.425	922.425	-1.28115	81.168	119.011	72.5682	18.3333	4	48.8184
1105	4	5	921.673	921.673	-1.2801	81.168	119.224	72.8323	18.4167	4	48.9464
1110	4	5	920.924	920.924	-1.27906	81.168	119.435	73.0964	18.5	4	49.0744
1115	4	5	920.178	920.178	-1.27803	81.168	119.645	73.3603	18.5833	4	49.2022
1120	4	5	919.436	919.436	-1.27699	81.168	119.854	73.6243	18.6667	4	49.3299
1125	4	5	918.696	918.696	-1.27597	81.168	120.062	73.8881	18.75	4	49.4575
1130	4	5	917.96	917.96	-1.27494	81.168	120.27	74.1519	18.8333	4	49.5849
1135	4	5	917.227	917.227	-1.27393	81.168	120.476	74.4156	18.9167	4	49.7123
1140	4	5	916.497	916.497	-1.27291	81.168	120.681	74.6792	19	4	49.8396
1145	4	5	915.77	915.77	-1.2719	81.168	120.886	74.9427	19.0833	4	49.9668
1150	4	5	915.046	915.046	-1.2709	81.168	121.089	75.2062	19.1667	4	50.0939
1155	4	5	914.326	914.326	-1.2699	81.168	121.292	75.4696	19.25	4	50.2209
1160	4	5	913.608	913.608	-1.2689	81.168	121.493	75.733	19.3333	4	50.3478
1165	4	5	912.894	912.894	-1.26791	81.168	121.694	75.9962	19.4167	4	50.4746
1170	4	5	912.182	912.182	-1.26692	81.168	121.894	76.2594	19.5	4	50.6013
1175	4	5	911.474	911.474	-1.26594	81.168	122.093	76.5225	19.5833	4	50.7279
1180	4	5	910.768	910.768	-1.26496	81.168	122.291	76.7856	19.6667	4	50.8544
1185	4	5	910.066	910.066	-1.26398	81.168	122.488	77.0485	19.75	4	50.9808
1190	4	5	909.367	909.367	-1.26301	81.168	122.684	77.3114	19.8333	4	51.1071
1195	4	5	908.67	908.67	-1.26204	81.168	122.879	77.5743	19.9167	4	51.2333
1200	4	5	907.977	907.977	-1.26108	81.168	123.074	77.837	20	4	51.3594
1205	4	5	907.286	907.286	-1.26012	81.168	123.267	78.0997	20.0833	4	51.4854
1210	4	5	906.599	906.599	-1.25916	81.168	123.46	78.3623	20.1667	4	51.6113
1215	4	5	905.914	905.914	-1.25821	81.168	123.652	78.6249	20.25	4	51.7371
1220	4	5	905.232	905.232	-1.25727	81.168	123.842	78.8873	20.3333	4	51.8629
1225	4	5	904.554	904.554	-1.25632	81.168	124.032	79.1497	20.4167	4	51.9885
1230	4	5	903.878	903.878	-1.25539	81.168	124.221	79.412	20.5	4	52.114
1235	4	5	903.205	903.205	-1.25445	81.168	124.41	79.6743	20.5833	4	52.2395
1240	4	5	902.534	902.534	-1.25352	81.168	124.597	79.9365	20.6667	4	52.3648
1245	4	5	901.867	901.867	-1.25259	81.168	124.783	80.1986	20.75	4	52.4901
1250	4	5	901.203	901.203	-1.25167	81.168	124.969	80.4606	20.8333	4	52.6152
1255	4	5	900.541	900.541	-1.25075	81.168	125.154	80.7226	20.9167	4	52.7403
1260	4	5	899.882	899.882	-1.24984	81.168	125.338	80.9845	21	4	52.8653
1265	4	5	899.226	899.226	-1.24892	81.168	125.521	81.2463	21.0833	4	52.9902
1270	4	5	898.573	898.573	-1.24802	81.168	125.703	81.508	21.1667	4	53.115
1275	4	5	897.922	897.922	-1.24711	81.168	125.885	81.7697	21.25	4	53.2397
1280	4	5	897.274	897.274	-1.24621	81.168	126.065	82.0313	21.3333	4	53.3643
1285	4	5	896.629	896.629	-1.24532	81.168	126.245	82.2928	21.4167	4	53.4889
1290	4	5	895.987	895.987	-1.24443	81.168	126.424	82.5543	21.5	4	53.6133
1295	4	5	895.347	895.347	-1.24354	81.168	126.602	82.8157	21.5833	4	53.7377
1300	4	5	894.711	894.711	-1.24265	81.168	126.779	83.077	21.6667	4	53.8619
1305	4	5	894.076	894.076	-1.24177	81.168	126.956	83.3382	21.75	4	53.9861
1310	4	5	893.445	893.445	-1.2409	81.168	127.132	83.5994	21.8333	4	54.1102
1315	4	5	892.816	892.816	-1.24002	81.168	127.306	83.8605	21.9167	4	54.2342
1320	4	5	892.19	892.19	-1.23915	81.168	127.481	84.1215	22	4	54.3581
1325	4	5	891.566	891.566	-1.23829	81.168	127.654	84.3825	22.0833	4	54.4819
1330	4	5	890.946	890.946	-1.23742	81.168	127.826	84.6433	22.1667	4	54.6057
1335	4	5	890.327	890.327	-1.23657	81.168	127.998	84.9042	22.25	4	54.7293
1340	4	5	889.712	889.712	-1.23571	81.168	128.169	85.1649	22.3333	4	54.8529
1345	4	5	889.099	889.099	-1.23486	81.168	128.339	85.4256	22.4167	4	54.9764
1350	4	5	888.488	888.488	-1.23401	81.168	128.508	85.6862	22.5	4	55.0998
1355	4	5	887.88	887.88	-1.23317	81.168	128.677	85.9467	22.5833	4	55.2231
1360	4	5	887.275	887.275	-1.23233	81.168	128.845	86.2071	22.6667	4	55.3463
1365	4	5	886.672	886.672	-1.23149	81.168	129.012	86.4675	22.75	4	55.4695
1370	4	5	886.072	886.072	-1.23066	81.168	129.178	86.7278	22.8333	4	55.5926
1375	4	5	885.474	885.474	-1.22983	81.168	129.344	86.9881	22.9167	4	55.7155
1380	4	5	884.879	884.879	-1.229	81.168	129.508	87.2482	23	4	55.8384
1385	4	5	884.287	884.287	-1.22818	81.168	129.672	87.5083	23.0833	4	55.9613
1390	4	5	883.696	883.696	-1.22736	81.168	129.836	87.7684	23.1667	4	56.084
1395	4	5	883.109	883.109	-1.22654	81.168	129.998	88.0283	23.25	4	56.2067
1400	4	5	882.524	882.524	-1.22573	81.168	130.16	88.2882	23.3333	4	56.3292
1405	4	5	881.941	881.941	-1.22492	81.168	130.321	88.548	23.4167	4	56.4517
1410	4	5	881.361	881.361	-1.22411	81.168	130.481	88.8077	23.5	4	56.5741
1415	4	5	880.783	880.783	-1.22331	81.168	130.641	89.0674	23.5833	4	56.6965
1420	4	5	880.207	880.207	-1.22251	81.168	130.799	89.327	23.6667	4	56.8187
1425	4	5	879.634	879.634	-1.22171	81.168	130.957	89.5865	23.75	4	56.9409
1430	4	5	879.064	879.064	-1.22092	81.168	131.115	89.846	23.8333	4	57.063
1435	4	5	878.495	878.495	-1.22013	81.168	131.271	90.1053	23.9167	4	57.185
1440	4	5	877.93	877.93	-1.21935	81.168	131.427	90.3647	24	4	57.3069
1445	4	5	877.366	877.366	-1.21856	81.168	131.583	90.6239	24.0833	4	57.4288
1450	4	5	876.805	876.805	-1.21778	81.168	131.737	90.8831	24.1667	4	57.5506
1455	4	5	876.246	876.246	-1.21701	81.168	131.891	91.1422	24.25	4	57.6723
1460	4	5	875.69	875.69	-1.21624	81.168	132.044	91.4012	24.3333	4	57.7939
1465	4	5	875.136	875.136	-1.21547	81.168	132.196	91.6601	24.4167	4	57.9154
1470	4	5	874.584	874.584	-1.2147	81.168	132.348	91.919	24.5	4	58.0369
1475	4	5	874.034	874.034	-1.21394	81.168	132.499	92.1778	24.5833	4	58.1583
1480	4	5	873.487	873.487	-1.21318	81.168	132.649	92.4366	24.6667	4	58.2796
1485	4	5	872.942	872.942	-1.21242	81.168	132.799	92.6952	24.75	4	58.4008
1490	4	5	872.4	872.4	-1.21167	81.168	132.948	92.9538	24.8333	4	58.522
1495	4	5	871.86	871.86	-1.21092	81.168	133.096	93.2124	24.9167	4	58.6431
1500	4	5	871.321	871.321	-1.21017	81.168	133.243	93.4708	25	4	58.7641
1505	4	5	870.786	870.786	-1.20942	81.168	133.39	93.7292	25.0833	4	58.8851
1510	4	5	870.252	870.252	-1.20868	81.168	133.536	93.9875	25.1667	4	59.0059
1515	4	5	869.721	869.721	-1.20795	81.168	133.682	94.2457	25.25	4	59.1267
1520	4	5	869.191	869.191	-1.20721	81.168	133.827	94.5039	25.3333	4	59.2474
1525	4	5	868.665	868.665	-1.20648	81.168	133.971	94.762	25.4167	4	59.3681
1530	4	5	868.14	868.14	-1.20575	81.168	134.115	95.02	25.5	4	59.4887
1535	4	5	867.617	867.617	-1.20502	81.168	134.257	95.278	25.5833	4	59.6092
1540	4	5	867.097	867.097	-1.2043	81.168	134.4	95.5359	25.6667	4	59.7296
1545	4	5	866.579	866.579	-1.20358	81.168	134.541	95.7937	25.75	4	59.85
1550	4	5	866.063	866.063	-1.20286	81.168	134.682	96.0514	25.8333	4	59.9702
1555	4	5	865.549	865.549	-1.20215	81.168	134.822	96.3091	25.9167	4	60.0905
1560	4	5	865.037	865.037	-1.20144	81.168	134.962	96.5667	26	4	60.2106
1565	4	5	864.527	864.527	-1.20073	81.168	135.101	96.8243	26.0833	4	60.3307
1570	4	5	864.02	864.02	-1.20003	81.168	135.239	97.0817	26.1667	4	60.4507
1575	4	5	863.514	863.514	-1.19933	81.168	135.377	97.3391	26.25	4	60.5706
1580	4	5	863.011	863.011	-1.19863	81.168	135.514	97.5964	26.3333	4	60.6905
1585	4	5	862.51	862.51	-1.19793	81.168	135.651	97.8537	26.4167	4	60.8103
1590	4	5	862.01	862.01	-1.19724	81.168	135.787	98.1109	26.5	4	60.93
1595	4	5	861.513	861.513	-1.19655	81.168	135.922	98.368	26.5833	4	61.0497
1600	4	5	861.018	861.018	-1.19586	81.168	136.056	98.625	26.6667	4	61.1692
1605	4	5	860.525	860.525	-1.19517	81.168	136.19	98.882	26.75	4	61.2888
1610	4	5	860.034	860.034	-1.19449	81.168	136.324	99.1389	26.8333	4	61.4082
1615	4	5	859.545	859.545	-1.19381	81.168	136.456	99.3957	26.9167	4	61.5276
1620	4	5	859.058	859.058	-1.19314	81.168	136.589	99.6524	27	4	61.6469
1625	4	5	858.574	858.574	-1.19246	81.168	136.72	99.9091	27.0833	4	61.7661
1630	4	5	858.091	858.091	-1.19179	81.168	136.851	100.166	27.1667	4	61.8853
1635	4	5	857.61	857.61	-1.19112	81.168	136.981	100.422	27.25	4	62.0044
1640	4	5	857.131	857.131	-1.19046	81.168	137.111	100.679	27.3333	4	62.1235
1645	4	5	856.654	856.654	-1.1898	81.168	137.24	100.935	27.4167	4	62.2425
1650	4	5	856.179	856.179	-1.18914	81.168	137.369	101.191	27.5	4	62.3614
1655	4	5	855.706	855.706	-1.18848	81.168	137.497	101.448	27.5833	4	62.4802
1660	4	5	855.235	855.235	-1.18783	81.168	137.624	101.704	27.6667	4	62.599
1665	4	5	854.766	854.766	-1.18717	81.168	137.751	101.96	27.75	4	62.7177
1670	4	5	854.299	854.299	-1.18653	81.168	137.877	102.216	27.8333	4	62.8364
1675	4	5	853.833	853.833	-1.18588	81.168	138.003	102.472	27.9167	4	62.955
1680	4	5	853.37	853.37	-1.18524	81.168	138.128	102.728	28	4	63.0735
1685	4	5	852.908	852.908	-1.1846	81.168	138.252	102.984	28.0833	4	63.1919
1690	4	5	852.449	852.449	-1.18396	81.168	138.376	103.24	28.1667	4	63.3103
1695	4	5	851.991	851.991	-1.18332	81.168	138.5	103.495	28.25	4	63.4287
1700	4	5	851.535	851.535	-1.18269	81.168	138.622	103.751	28.3333	4	63.5469
1705	4	5	851.082	851.082	-1.18206	81.168	138.745	104.006	28.4167	4	63.6652
1710	4	5	850.63	850.63	-1.18143	81.168	138.866	104.262	28.5	4	63.7833
1715	4	5	850.179	850.179	-1.1808	81.168	138.987	104.517	28.5833	4	63.9014
1720	4	5	849.731	849.731	-1.18018	81.168	139.108	104.773	28.6667	4	64.0194
1725	4	5	849.284	849.284	-1.17956	81.168	139.228	105.028	28.75	4	64.1373
1730	4	5	848.84	848.84	-1.17894	81.168	139.347	105.283	28.8333	4	64.2552
1735	4	5	848.397	848.397	-1.17833	81.168	139.466	105.538	28.9167	4	64.3731
1740	4	5	847.956	847.956	-1.17772	81.168	139.585	105.793	29	4	64.4908
1745	4	5	847.517	847.517	-1.17711	81.168	139.702	106.048	29.0833	4	64.6086
1750	4	5	847.079	847.079	-1.1765	81.168	139.82	106.303	29.1667	4	64.7262
1755	4	5	846.643	846.643	-1.17589	81.168	139.936	106.558	29.25	4	64.8438
1760	4	5	846.21	846.21	-1.17529	81.168	140.053	106.813	29.3333	4	64.9613
1765	4	5	845.777	845.777	-1.17469	81.168	140.168	107.068	29.4167	4	65.0788
1770	4	5	845.347	845.347	-1.17409	81.168	140.283	107.322	29.5	4	65.1962
1775	4	5	844.919	844.919	-1.1735	81.168	140.398	107.577	29.5833	4	65.3136
1780	4	5	844.492	844.492	-1.17291	81.168	140.512	107.831	29.6667	4	65.4308
1785	4	5	844.067	844.067	-1.17231	81.168	140.626	108.086	29.75	4	65.5481
1790	4	5	843.643	843.643	-1.17173	81.168	140.739	108.34	29.8333	4	65.6652
1795	4	5	843.222	843.222	-1.17114	81.168	140.851	108.594	29.9167	4	65.7824
1800	4	5	842.802	842.802	-1.17056	81.168	140.963	108.849	30	4	65.8994
1805	4	5	842.383	842.383	-1.16998	81.168	141.075	109.103	30.0833	4	66.0164
1810	4	5	841.967	841.967	-1.1694	81.168	141.186	109.357	30.1667	4	66.1334
1815	4	5	841.552	841.552	-1.16882	81.168	141.296	109.611	30.25	4	66.2502
1820	4	5	841.139	841.139	-1.16825	81.168	141.406	109.865	30.3333	4	66.3671
1825	4	5	840.727	840.727	-1.16768	81.168	141.515	110.119	30.4167	4	66.4838
1830	4	5	840.318	840.318	-1.16711	81.168	141.624	110.373	30.5	4	66.6005
1835	4	5	839.909	839.909	-1.16654	81.168	141.733	110.626	30.5833	4	66.7172
1840	4	5	839.503	839.503	-1.16598	81.168	141.841	110.88	30.6667	4	66.8338
1845	4	5	839.098	839.098	-1.16541	81.168	141.948	111.134	30.75	4	66.9503
1850	4	5	838.695	838.695	-1.16485	81.168	142.055	111.387	30.8333	4	67.0668
1855	4	5	838.293	838.293	-1.1643	81.168	142.162	111.641	30.9167	4	67.1833
1860	4	5	837.893	837.893	-1.16374	81.168	142.268	111.894	31	4	67.2996
1865	4	5	837.495	837.495	-1.16319	81.168	142.373	112.147	31.0833	4	67.4159
1870	4	5	837.098	837.098	-1.16264	81.168	142.478	112.401	31.1667	4	67.5322
1875	4	5	836.703	836.703	-1.16209	81.168	142.583	112.654	31.25	4	67.6484
1880	4	5	836.31	836.31	-1.16154	81.168	142.687	112.907	31.3333	4	67.7646
1885	4	5	835.918	835.918	-1.161	81.168	142.79	113.16	31.4167	4	67.8807
1890	4	5	835.527	835.527	-1.16045	81.168	142.894	113.413	31.5	4	67.9967
1895	4	5	835.139	835.139	-1.15991	81.168	142.996	113.666	31.5833	4	68.1127
1900	4	5	834.751	834.751	-1.15938	81.168	143.098	113.919	31.6667	4	68.2286
1905	4	5	834.366	834.366	-1.15884	81.168	143.2	114.171	31.75	4	68.3445
1910	4	5	833.982	833.982	-1.15831	81.168	143.301	114.424	31.8333	4	68.4604
1915	4	5	833.599	833.599	-1.15778	81.168	143.402	114.677	31.9167	4	68.5761
1920	4	5	833.218	833.218	-1.15725	81.168	143.502	114.929	32	4	68.6919
1925	4	5	832.839	832.839	-1.15672	81.168	143.602	115.182	32.0833	4	68.8075
1930	4	5	832.461	832.461	-1.1562	81.168	143.702	115.434	32.1667	4	68.9232
1935	4	5	832.084	832.084	-1.15567	81.168	143.801	115.686	32.25	4	69.0387
1940	4	5	831.709	831.709	-1.15515	81.168	143.899	115.939	32.3333	4	69.1542
1945	4	5	831.336	831.336	-1.15463	81.168	143.997	116.191	32.4167	4	69.2697
1950	4	5	830.964	830.964	-1.15412	81.168	144.095	116.443	32.5	4	69.3851
1955	4	5	830.593	830.593	-1.1536	81.168	144.192	116.695	32.5833	4	69.5005
1960	4	5	830.224	830.224	-1.15309	81.168	144.288	116.947	32.6667	4	69.6158
1965	4	5	829.857	829.857	-1.15258	81.168	144.385	117.199	32.75	4	69.731
1970	4	5	829.491	829.491	-1.15207	81.168	144.481	117.451	32.8333	4	69.8462
1975	4	5	829.126	829.126	-1.15156	81.168	144.576	117.703	32.9167	4	69.9614
1980	4	5	828.763	828.763	-1.15106	81.168	144.671	117.954	33	4	70.0765
1985	4	5	828.402	828.402	-1.15056	81.168	144.765	118.206	33.0833	4	70.1916
1990	4	5	828.041	828.041	-1.15006	81.168	144.859	118.458	33.1667	4	70.3066
1995	4	5	827.683	827.683	-1.14956	81.168	144.953	118.709	33.25	4	70.4215
2000	4	5	827.325	827.325	-1.14906	81.168	145.046	118.961	33.3333	4	70.5364
2005	4	5	826.969	826.969	-1.14857	81.168	145.139	119.212	33.4167	4	70.6513
2010	4	5	826.615	826.615	-1.14808	81.168	145.231	119.463	33.5	4	70.7661
2015	4	5	826.262	826.262	-1.14759	81.168	145.323	119.714	33.5833	4	70.8809
2020	4	5	825.91	825.91	-1.1471	81.168	145.415	119.966	33.6667	4	70.9956
2025	4	5	825.56	825.56	-1.14661	81.168	145.506	120.217	33.75	4	71.1102
2030	4	5	825.211	825.211	-1.14613	81.168	145.596	120.468	33.8333	4	71.2248
2035	4	5	824.863	824.863	-1.14564	81.168	145.687	120.719	33.9167	4	71.3394
2040	4	5	824.517	824.517	-1.14516	81.168	145.777	120.97	34	4	71.4539
2045	4	5	824.172	824.172	-1.14468	81.168	145.866	121.22	34.0833	4	71.5684
2050	4	5	823.829	823.829	-1.14421	81.168	145.955	121.471	34.1667	4	71.6828
2055	4	5	823.487	823.487	-1.14373	81.168	146.044	121.722	34.25	4	71.7972
2060	4	5	823.146	823.146	-1.14326	81.168	146.132	121.973	34.3333	4	71.9115
2065	4	5	822.807	822.807	-1.14279	81.168	146.22	122.223	34.4167	4	72.0258
2070	4	5	822.469	822.469	-1.14232	81.168	146.307	122.474	34.5	4	72.14
2075	4	5	822.132	822.132	-1.14185	81.168	146.394	122.724	34.5833	4	72.2542
2080	4	5	821.797	821.797	-1.14138	81.168	146.481	122.974	34.6667	4	72.3683
2085	4	5	821.463	821.463	-1.14092	81.168	146.567	123.225	34.75	4	72.4824
2090	4	5	821.13	821.13	-1.14046	81.168	146.653	123.475	34.8333	4	72.5965
2095	4	5	820.799	820.799	-1.14	81.168	146.738	123.725	34.9167	4	72.7105
2100	4	5	820.469	820.469	-1.13954	81.168	146.823	123.975	35	4	72.8244
2105	4	5	820.14	820.14	-1.13908	81.168	146.908	124.225	35.0833	4	72.9383
2110	4	5	819.813	819.813	-1.13863	81.168	146.992	124.475	35.1667	4	73.0522
2115	4	5	819.486	819.486	-1.13818	81.168	147.076	124.725	35.25	4	73.166
2120	4	5	819.161	819.161	-1.13772	81.168	147.159	124.975	35.3333	4	73.2798
2125	4	5	818.838	818.838	-1.13727	81.168	147.242	125.224	35.4167	4	73.3935
2130	4	5	818.515	818.515	-1.13683	81.168	147.325	125.474	35.5	4	73.5072
2135	4	5	818.194	818.194	-1.13638	81.168	147.407	125.723	35.5833	4	73.6208
2140	4	5	817.874	817.874	-1.13594	81.168	147.489	125.973	35.6667	4	73.7344
2145	4	5	817.556	817.556	-1.13549	81.168	147.571	126.222	35.75	4	73.848
2150	4	5	817.239	817.239	-1.13505	81.168	147.652	126.472	35.8333	4	73.9615
2155	4	5	816.922	816.922	-1.13461	81.168	147.733	126.721	35.9167	4	74.075
2160	4	5	816.608	816.608	-1.13418	81.168	147.813	126.97	36	4	74.1884
2165	4	5	816.294	816.294	-1.13374	81.168	147.893	127.22	36.0833	4	74.3017
2170	4	5	815.982	815.982	-1.13331	81.168	147.973	127.469	36.1667	4	74.4151
2175	4	5	815.67	815.67	-1.13288	81.168	148.053	127.718	36.25	4	74.5284
2180	4	5	815.36	815.36	-1.13244	81.168	148.132	127.967	36.3333	4	74.6416
2185	4	5	815.052	815.052	-1.13202	81.168	148.21	128.216	36.4167	4	74.7548
2190	4	5	814.744	814.744	-1.13159	81.168	148.288	128.464	36.5	4	74.868
2195	4	5	814.438	814.438	-1.13116	81.168	148.366	128.713	36.5833	4	74.9811
2200	4	5	814.132	814.132	-1.13074	81.168	148.444	128.962	36.6667	4	75.0942
2205	4	5	813.829	813.829	-1.13032	81.168	148.521	129.21	36.75	4	75.2072
2210	4	5	813.526	813.526	-1.1299	81.168	148.598	129.459	36.8333	4	75.3202
2215	4	5	813.224	813.224	-1.12948	81.168	148.674	129.707	36.9167	4	75.4331
2220	4	5	812.924	812.924	-1.12906	81.168	148.751	129.956	37	4	75.546
2225	4	5	812.624	812.624	-1.12864	81.168	148.826	130.204	37.0833	4	75.6589
2230	4	5	812.326	812.326	-1.12823	81.168	148.902	130.453	37.1667	4	75.7717
2235	4	5	812.029	812.029	-1.12782	81.168	148.977	130.701	37.25	4	75.8845
2240	4	5	811.733	811.733	-1.12741	81.168	149.052	130.949	37.3333	4	75.9972
2245	4	5	811.439	811.439	-1.127	81.168	149.126	131.197	37.4167	4	76.1099
2250	4	5	811.145	811.145	-1.12659	81.168	149.2	131.445	37.5	4	76.2226
2255	4	5	810.853	810.853	-1.12618	81.168	149.274	131.693	37.5833	4	76.3352
2260	4	5	810.561	810.561	-1.12578	81.168	149.347	131.941	37.6667	4	76.4478
2265	4	5	810.271	810.271	-1.12538	81.168	149.42	132.189	37.75	4	76.5603
2270	4	5	809.982	809.982	-1.12498	81.168	149.493	132.436	37.8333	4	76.6728
2275	4	5	809.694	809.694	-1.12458	81.168	149.565	132.684	37.9167	4	76.7853
2280	4	5	809.407	809.407	-1.12418	81.168	149.638	132.932	38	4	76.8977
2285	4	5	809.122	809.122	-1.12378	81.168	149.709	133.179	38.0833	4	77.0101
2290	4	5	808.837	808.837	-1.12338	81.168	149.781	133.427	38.1667	4	77.1224
2295	4	5	808.554	808.554	-1.12299	81.168	149.852	133.674	38.25	4	77.2347
2300	4	5	808.271	808.271	-1.1226	81.168	149.922	133.921	38.3333	4	77.347
2305	4	5	807.99	807.99	-1.12221	81.168	149.993	134.169	38.4167	4	77.4592
2310	4	5	807.71	807.71	-1.12182	81.168	150.063	134.416	38.5	4	77.5714
2315	4	5	807.43	807.43	-1.12143	81.168	150.133	134.663	38.5833	4	77.6835
2320	4	5	807.152	807.152	-1.12104	81.168	150.202	134.91	38.6667	4	77.7956
2325	4	5	806.875	806.875	-1.12066	81.168	150.271	135.157	38.75	4	77.9077
2330	4	5	806.599	806.599	-1.12028	81.168	150.34	135.404	38.8333	4	78.0197
2335	4	5	806.324	806.324	-1.11989	81.168	150.409	135.651	38.9167	4	78.1317
2340	4	5	806.05	806.05	-1.11951	81.168	150.477	135.897	39	4	78.2437
2345	4	5	805.777	805.777	-1.11914	81.168	150.545	136.144	39.0833	4	78.3556
2350	4	5	805.506	805.506	-1.11876	81.168	150.612	136.391	39.1667	4	78.4675
2355	4	5	805.235	805.235	-1.11838	81.168	150.68	136.637	39.25	4	78.5793
2360	4	5	804.965	804.965	-1.11801	81.168	150.747	136.884	39.3333	4	78.6911
2365	4	5	804.696	804.696	-1.11763	81.168	150.813	137.13	39.4167	4	78.8029
2370	4	5	804.429	804.429	-1.11726	81.168	150.88	137.377	39.5	4	78.9146
2375	4	5	804.162	804.162	-1.11689	81.168	150.946	137.623	39.5833	4	79.0263
2380	4	5	803.896	803.896	-1.11652	81.168	151.011	137.869	39.6667	4	79.1379
2385	4	5	803.632	803.632	-1.11615	81.168	151.077	138.115	39.75	4	79.2495
2390	4	5	803.368	803.368	-1.11579	81.168	151.142	138.362	39.8333	4	79.3611
2395	4	5	803.105	803.105	-1.11542	81.168	151.207	138.608	39.9167	4	79.4727
2400	4	5	802.844	802.844	-1.11506	81.168	151.271	138.854	40	4	79.5842
2405	4	5	802.583	802.583	-1.1147	81.168	151.336	139.099	40.0833	4	79.6956
2410	4	5	802.323	802.323	-1.11434	81.168	151.399	139.345	40.1667	4	79.8071
2415	4	5	802.064	802.064	-1.11398	81.168	151.463	139.591	40.25	4	79.9185
2420	4	5	801.807	801.807	-1.11362	81.168	151.526	139.837	40.3333	4	80.0298
2425	4	5	801.55	801.55	-1.11326	81.168	151.59	140.082	40.4167	4	80.1412
2430	4	5	801.294	801.294	-1.11291	81.168	151.652	140.328	40.5	4	80.2525
2435	4	5	801.039	801.039	-1.11255	81.168	151.715	140.573	40.5833	4	80.3637
2440	4	5	800.785	800.785	-1.1122	81.168	151.777	140.819	40.6667	4	80.4749
2445	4	5	800.532	800.532	-1.11185	81.168	151.839	141.064	40.75	4	80.5861
2450	4	5	800.281	800.281	-1.1115	81.168	151.901	141.31	40.8333	4	80.6973
2455	4	5	800.029	800.029	-1.11115	81.168	151.962	141.555	40.9167	4	80.8084
2460	4	5	799.779	799.779	-1.1108	81.168	152.023	141.8	41	4	80.9195
2465	4	5	799.53	799.53	-1.11046	81.168	152.084	142.045	41.0833	4	81.0305
2470	4	5	799.282	799.282	-1.11011	81.168	152.144	142.29	41.1667	4	81.1415
2475	4	5	799.035	799.035	-1.10977	81.168	152.205	142.535	41.25	4	81.2525
2480	4	5	798.788	798.788	-1.10943	81.168	152.265	142.78	41.3333	4	81.3634
2485	4	5	798.543	798.543	-1.10909	81.168	152.324	143.025	41.4167	4	81.4743
2490	4	5	798.298	798.298	-1.10875	81.168	152.384	143.27	41.5	4	81.5852
2495	4	5	798.055	798.055	-1.10841	81.168	152.443	143.514	41.5833	4	81.6961
2500	4	5	797.812	797.812	-1.10807	81.168	152.502	143.759	41.6667	4	81.8069
2505	4	5	797.57	797.57	-1.10774	81.168	152.56	144.003	41.75	4	81.9176
2510	4	5	797.329	797.329	-1.1074	81.168	152.619	144.248	41.8333	4	82.0284
2515	4	5	797.089	797.089	-1.10707	81.168	152.677	144.492	41.9167	4	82.1391
2520	4	5	796.85	796.85	-1.10674	81.168	152.734	144.737	42	4	82.2498
2525	4	5	796.612	796.612	-1.10641	81.168	152.792	144.981	42.0833	4	82.3604
2530	4	5	796.375	796.375	-1.10608	81.168	152.849	145.225	42.1667	4	82.471
2535	4	5	796.138	796.138	-1.10575	81.168	152.906	145.469	42.25	4	82.5816
2540	4	5	795.903	795.903	-1.10542	81.168	152.963	145.713	42.3333	4	82.6921
2545	4	5	795.668	795.668	-1.10509	81.168	153.02	145.957	42.4167	4	82.8026
2550	4	5	795.434	795.434	-1.10477	81.168	153.076	146.201	42.5	4	82.9131
2555	4	5	795.201	795.201	-1.10445	81.168	153.132	146.445	42.5833	4	83.0236
2560	4	5	794.969	794.969	-1.10412	81.168	153.187	146.689	42.6667	4	83.134
2565	4	5	794.738	794.738	-1.1038	81.168	153.243	146.933	42.75	4	83.2443
2570	4	5	794.507	794.507	-1.10348	81.168	153.298	147.176	42.8333	4	83.3547
2575	4	5	794.278	794.278	-1.10316	81.168	153.353	147.42	42.9167	4	83.465
2580	4	5	794.049	794.049	-1.10285	81.168	153.408	147.664	43	4	83.5753
2585	4	5	793.821	793.821	-1.10253	81.168	153.462	147.907	43.0833	4	83.6856
2590	4	5	793.594	793.594	-1.10221	81.168	153.516	148.151	43.1667	4	83.7958
2595	4	5	793.368	793.368	-1.1019	81.168	153.57	148.394	43.25	4	83.906
2600	4	5	793.142	793.142	-1.10159	81.168	153.624	148.637	43.3333	4	84.0161
2605	4	5	792.918	792.918	-1.10127	81.168	153.678	148.88	43.4167	4	84.1262
2610	4	5	792.694	792.694	-1.10096	81.168	153.731	149.124	43.5	4	84.2363
2615	4	5	792.471	792.471	-1.10065	81.168	153.784	149.367	43.5833	4	84.3464
2620	4	5	792.249	792.249	-1.10035	81.168	153.836	149.61	43.6667	4	84.4564
2625	4	5	792.028	792.028	-1.10004	81.168	153.889	149.853	43.75	4	84.5664
2630	4	5	791.807	791.807	-1.09973	81.168	153.941	150.095	43.8333	4	84.6764
2635	4	5	791.587	791.587	-1.09943	81.168	153.993	150.338	43.9167	4	84.7864
2640	4	5	791.369	791.369	-1.09912	81.168	154.045	150.581	44	4	84.8963
2645	4	5	791.15	791.15	-1.09882	81.168	154.096	150.824	44.0833	4	85.0062
2650	4	5	790.933	790.933	-1.09852	81.168	154.148	151.066	44.1667	4	85.116
2655	4	5	790.717	790.717	-1.09822	81.168	154.199	151.309	44.25	4	85.2258
2660	4	5	790.501	790.501	-1.09792	81.168	154.25	151.551	44.3333	4	85.3356
2665	4	5	790.286	790.286	-1.09762	81.168	154.3	151.794	44.4167	4	85.4454
2670	4	5	790.072	790.072	-1.09732	81.168	154.351	152.036	44.5	4	85.5551
2675	4	5	789.858	789.858	-1.09703	81.168	154.401	152.278	44.5833	4	85.6648
2680	4	5	789.646	789.646	-1.09673	81.168	154.451	152.521	44.6667	4	85.7745
2685	4	5	789.434	789.434	-1.09644	81.168	154.5	152.763	44.75	4	85.8841
2690	4	5	789.223	789.223	-1.09614	81.168	154.55	153.005	44.8333	4	85.9938
2695	4	5	789.013	789.013	-1.09585	81.168	154.599	153.247	44.9167	4	86.1033
2700	4	5	788.803	788.803	-1.09556	81.168	154.648	153.489	45	4	86.2129
2705	4	5	788.594	788.594	-1.09527	81.168	154.697	153.731	45.0833	4	86.3224
2710	4	5	788.386	788.386	-1.09498	81.168	154.745	153.972	45.1667	4	86.4319
2715	4	5	788.179	788.179	-1.09469	81.168	154.794	154.214	45.25	4	86.5414
2720	4	5	787.972	787.972	-1.09441	81.168	154.842	154.456	45.3333	4	86.6508
2725	4	5	787.766	787.766	-1.09412	81.168	154.89	154.697	45.4167	4	86.7602
2730	4	5	787.561	787.561	-1.09384	81.168	154.937	154.939	45.5	4	86.8696
2735	4	5	787.357	787.357	-1.09355	81.168	154.985	155.18	45.5833	4	86.979
2740	4	5	787.153	787.153	-1.09327	81.168	155.032	155.422	45.6667	4	87.0883
2745	4	5	786.95	786.95	-1.09299	81.168	155.079	155.663	45.75	4	87.1976
2750	4	5	786.748	786.748	-1.09271	81.168	155.126	155.905	45.8333	4	87.3069
2755	4	5	786.547	786.547	-1.09243	81.168	155.172	156.146	45.9167	4	87.4161
2760	4	5	786.346	786.346	-1.09215	81.168	155.219	156.387	46	4	87.5253
2765	4	5	786.146	786.146	-1.09187	81.168	155.265	156.628	46.0833	4	87.6345
2770	4	5	785.947	785.947	-1.09159	81.168	155.311	156.869	46.1667	4	87.7437
2775	4	5	785.748	785.748	-1.09132	81.168	155.356	157.11	46.25	4	87.8528
2780	4	5	785.55	785.55	-1.09104	81.168	155.402	157.351	46.3333	4	87.9619
2785	4	5	785.353	785.353	-1.09077	81.168	155.447	157.592	46.4167	4	88.071
2790	4	5	785.156	785.156	-1.09049	81.168	155.492	157.832	46.5	4	88.18
2795	4	5	784.961	784.961	-1.09022	81.168	155.537	158.073	46.5833	4	88.2891
2800	4	5	784.765	784.765	-1.08995	81.168	155.582	158.314	46.6667	4	88.3981
2805	4	5	784.571	784.571	-1.08968	81.168	155.626	158.554	46.75	4	88.507
2810	4	5	784.377	784.377	-1.08941	81.168	155.671	158.795	46.8333	4	88.616
2815	4	5	784.184	784.184	-1.08914	81.168	155.715	159.035	46.9167	4	88.7249
2820	4	5	783.992	783.992	-1.08888	81.168	155.759	159.275	47	4	88.8338
2825	4	5	783.8	783.8	-1.08861	81.168	155.802	159.516	47.0833	4	88.9426
2830	4	5	783.609	783.609	-1.08835	81.168	155.846	159.756	47.1667	4	89.0515
2835	4	5	783.419	783.419	-1.08808	81.168	155.889	159.996	47.25	4	89.1603
2840	4	5	783.229	783.229	-1.08782	81.168	155.932	160.236	47.3333	4	89.2691
2845	4	5	783.04	783.04	-1.08756	81.168	155.975	160.476	47.4167	4	89.3778
2850	4	5	782.852	782.852	-1.08729	81.168	156.018	160.716	47.5	4	89.4865
2855	4	5	782.664	782.664	-1.08703	81.168	156.06	160.956	47.5833	4	89.5952
2860	4	5	782.477	782.477	-1.08677	81.168	156.102	161.196	47.6667	4	89.7039
2865	4	5	782.291	782.291	-1.08651	81.168	156.145	161.436	47.75	4	89.8126
2870	4	5	782.105	782.105	-1.08626	81.168	156.186	161.675	47.8333	4	89.9212
2875	4	5	781.92	781.92	-1.086	81.168	156.228	161.915	47.9167	4	90.0298
2880	4	5	781.735	781.735	-1.08574	81.168	156.27	162.155	48	4	90.1384
2885	4	5	781.551	781.551	-1.08549	81.168	156.311	162.394	48.0833	4	90.2469
2890	4	5	781.368	781.368	-1.08523	81.168	156.352	162.634	48.1667	4	90.3554
2895	4	5	781.186	781.186	-1.08498	81.168	156.393	162.873	48.25	4	90.4639
2900	4	5	781.004	781.004	-1.08473	81.168	156.434	163.112	48.3333	4	90.5724
2905	4	5	780.823	780.823	-1.08448	81.168	156.474	163.351	48.4167	4	90.6809
2910	4	5	780.642	780.642	-1.08422	81.168	156.515	163.591	48.5	4	90.7893
2915	4	5	780.462	780.462	-1.08397	81.168	156.555	163.83	48.5833	4	90.8977
2920	4	5	780.282	780.282	-1.08373	81.168	156.595	164.069	48.6667	4	91.0061
2925	4	5	780.104	780.104	-1.08348	81.168	156.635	164.308	48.75	4	91.1144
2930	4	5	779.925	779.925	-1.08323	81.168	156.675	164.547	48.8333	4	91.2227
2935	4	5	779.748	779.748	-1.08298	81.168	156.714	164.785	48.9167	4	91.331
2940	4	5	779.571	779.571	-1.08274	81.168	156.753	165.024	49	4	91.4393
2945	4	5	779.395	779.395	-1.08249	81.168	156.792	165.263	49.0833	4	91.5475
2950	4	5	779.219	779.219	-1.08225	81.168	156.831	165.502	49.1667	4	91.6558
2955	4	5	779.044	779.044	-1.08201	81.168	156.87	165.74	49.25	4	91.764
2960	4	5	778.869	778.869	-1.08176	81.168	156.909	165.979	49.3333	4	91.8721
2965	4	5	778.695	778.695	-1.08152	81.168	156.947	166.217	49.4167	4	91.9803
2970	4	5	778.522	778.522	-1.08128	81.168	156.985	166.455	49.5	4	92.0884
2975	4	5	778.349	778.349	-1.08104	81.168	157.023	166.694	49.5833	4	92.1965
2980	4	5	778.177	778.177	-1.0808	81.168	157.061	166.932	49.6667	4	92.3046
2985	4	5	778.005	778.005	-1.08056	81.168	157.099	167.17	49.75	4	92.4127
2990	4	5	777.834	777.834	-1.08033	81.168	157.137	167.408	49.8333	4	92.5207
2995	4	5	777.664	777.664	-1.08009	81.168	157.174	167.646	49.9167	4	92.6287
3000	4	5	777.494	777.494	-1.07985	81.168	157.211	167.884	50	4	92.7367
3005	4	5	777.325	777.325	-1.07962	81.168	157.248	168.122	50.0833	4	92.8447
3010	4	5	777.156	777.156	-1.07938	81.168	157.285	168.36	50.1667	4	92.9526
3015	4	5	776.988	776.988	-1.07915	81.168	157.322	168.598	50.25	4	93.0605
3020	4	5	776.82	776.82	-1.07892	81.168	157.358	168.836	50.3333	4	93.1684
3025	4	5	776.654	776.654	-1.07869	81.168	157.394	169.073	50.4167	4	93.2763
3030	4	5	776.487	776.487	-1.07845	81.168	157.431	169.311	50.5	4	93.3841
3035	4	5	776.321	776.321	-1.07822	81.168	157.467	169.548	50.5833	4	93.4919
3040	4	5	776.156	776.156	-1.07799	81.168	157.503	169.786	50.6667	4	93.5997
3045	4	5	775.991	775.991	-1.07777	81.168	157.538	170.023	50.75	4	93.7075
3050	4	5	775.827	775.827	-1.07754	81.168	157.574	170.261	50.8333	4	93.8153
3055	4	5	775.663	775.663	-1.07731	81.168	157.609	170.498	50.9167	4	93.923
3060	4	5	775.5	775.5	-1.07708	81.168	157.644	170.735	51	4	94.0307
3065	4	5	775.338	775.338	-1.07686	81.168	157.679	170.972	51.0833	4	94.1384
3070	4	5	775.176	775.176	-1.07663	81.168	157.714	171.209	51.1667	4	94.2461
3075	4	5	775.014	775.014	-1.07641	81.168	157.749	171.446	51.25	4	94.3537
3080	4	5	774.853	774.853	-1.07619	81.168	157.783	171.683	51.3333	4	94.4613
3085	4	5	774.693	774.693	-1.07596	81.168	157.818	171.92	51.4167	4	94.5689
3090	4	5	774.533	774.533	-1.07574	81.168	157.852	172.157	51.5	4	94.6765
3095	4	5	774.374	774.374	-1.07552	81.168	157.886	172.394	51.5833	4	94.784
3100	4	5	774.215	774.215	-1.0753	81.168	157.92	172.63	51.6667	4	94.8916
3105	4	5	774.057	774.057	-1.07508	81.168	157.954	172.867	51.75	4	94.9991
3110	4	5	773.899	773.899	-1.07486	81.168	157.987	173.103	51.8333	4	95.1066
3115	4	5	773.742	773.742	-1.07464	81.168	158.021	173.34	51.9167	4	95.214
3120	4	5	773.585	773.585	-1.07442	81.168	158.054	173.576	52	4	95.3215
3125	4	5	773.429	773.429	-1.07421	81.168	158.087	173.813	52.0833	4	95.4289
3130	4	5	773.273	773.273	-1.07399	81.168	158.12	174.049	52.1667	4	95.5363
3135	4	5	773.118	773.118	-1.07377	81.168	158.153	174.285	52.25	4	95.6437
3140	4	5	772.963	772.963	-1.07356	81.168	158.186	174.521	52.3333	4	95.751
3145	4	5	772.809	772.809	-1.07335	81.168	158.218	174.758	52.4167	4	95.8584
3150	4	5	772.655	772.655	-1.07313	81.168	158.251	174.994	52.5	4	95.9657
3155	4	5	772.502	772.502	-1.07292	81.168	158.283	175.23	52.5833	4	96.073
3160	4	5	772.349	772.349	-1.07271	81.168	158.315	175.465	52.6667	4	96.1802
3165	4	5	772.197	772.197	-1.0725	81.168	158.347	175.701	52.75	4	96.2875
3170	4	5	772.046	772.046	-1.07229	81.168	158.379	175.937	52.8333	4	96.3947
3175	4	5	771.894	771.894	-1.07208	81.168	158.411	176.173	52.9167	4	96.5019
3180	4	5	771.744	771.744	-1.07187	81.168	158.442	176.408	53	4	96.6091
3185	4	5	771.594	771.594	-1.07166	81.168	158.474	176.644	53.0833	4	96.7163
3190	4	5	771.444	771.444	-1.07145	81.168	158.505	176.879	53.1667	4	96.8234
3195	4	5	771.295	771.295	-1.07124	81.168	158.536	177.115	53.25	4	96.9305
3200	4	5	771.146	771.146	-1.07104	81.168	158.567	177.35	53.3333	4	97.0376
3205	4	5	770.998	770.998	-1.07083	81.168	158.598	177.586	53.4167	4	97.1447
3210	4	5	770.85	770.85	-1.07062	81.168	158.628	177.821	53.5	4	97.2518
3215	4	5	770.703	770.703	-1.07042	81.168	158.659	178.056	53.5833	4	97.3588
3220	4	5	770.556	770.556	-1.07022	81.168	158.689	178.291	53.6667	4	97.4659
3225	4	5	770.41	770.41	-1.07001	81.168	158.719	178.526	53.75	4	97.5729
3230	4	5	770.264	770.264	-1.06981	81.168	158.75	178.761	53.8333	4	97.6798
3235	4	5	770.118	770.118	-1.06961	81.168	158.779	178.996	53.9167	4	97.7868
3240	4	5	769.973	769.973	-1.06941	81.168	158.809	179.231	54	4	97.8937
3245	4	5	769.829	769.829	-1.06921	81.168	158.839	179.466	54.0833	4	98.0007
3250	4	5	769.685	769.685	-1.06901	81.168	158.869	179.701	54.1667	4	98.1076
3255	4	5	769.541	769.541	-1.06881	81.168	158.898	179.935	54.25	4	98.2144
3260	4	5	769.398	769.398	-1.06861	81.168	158.927	180.17	54.3333	4	98.3213
3265	4	5	769.256	769.256	-1.06841	81.168	158.956	180.404	54.4167	4	98.4281
3270	4	5	769.113	769.113	-1.06821	81.168	158.985	180.639	54.5	4	98.535
3275	4	5	768.972	768.972	-1.06802	81.168	159.014	180.873	54.5833	4	98.6418
3280	4	5	768.83	768.83	-1.06782	81.168	159.043	181.108	54.6667	4	98.7485
3285	4	5	768.69	768.69	-1.06762	81.168	159.072	181.342	54.75	4	98.8553
3290	4	5	768.549	768.549	-1.06743	81.168	159.1	181.576	54.8333	4	98.9621
3295	4	5	768.409	768.409	-1.06723	81.168	159.129	181.81	54.9167	4	99.0688
3300	4	5	768.27	768.27	-1.06704	81.168	159.157	182.044	55	4	99.1755
3305	4	5	768.131	768.131	-1.06685	81.168	159.185	182.278	55.0833	4	99.2822
3310	4	5	767.992	767.992	-1.06666	81.168	159.213	182.512	55.1667	4	99.3888
3315	4	5	767.854	767.854	-1.06646	81.168	159.241	182.746	55.25	4	99.4955
3320	4	5	767.716	767.716	-1.06627	81.168	159.268	182.98	55.3333	4	99.6021
3325	4	5	767.579	767.579	-1.06608	81.168	159.296	183.214	55.4167	4	99.7087
3330	4	5	767.442	767.442	-1.06589	81.168	159.323	183.448	55.5	4	99.8153
3335	4	5	767.305	767.305	-1.0657	81.168	159.351	183.681	55.5833	4	99.9219
3340	4	5	767.169	767.169	-1.06551	81.168	159.378	183.915	55.6667	4	100.028
3345	4	5	767.034	767.034	-1.06532	81.168	159.405	184.148	55.75	4	100.135
3350	4	5	766.899	766.899	-1.06514	81.168	159.432	184.382	55.8333	4	100.241
3355	4	5	766.764	766.764	-1.06495	81.168	159.459	184.615	55.9167	4	100.348
3360	4	5	766.629	766.629	-1.06476	81.168	159.486	184.848	56	4	100.454
3365	4	5	766.495	766.495	-1.06458	81.168	159.512	185.082	56.0833	4	100.561
3370	4	5	766.362	766.362	-1.06439	81.168	159.539	185.315	56.1667	4	100.667
3375	4	5	766.229	766.229	-1.06421	81.168	159.565	185.548	56.25	4	100.774
3380	4	5	766.096	766.096	-1.06402	81.168	159.591	185.781	56.3333	4	100.88
3385	4	5	765.964	765.964	-1.06384	81.168	159.617	186.014	56.4167	4	100.987
3390	4	5	765.832	765.832	-1.06366	81.168	159.643	186.247	56.5	4	101.093
3395	4	5	765.7	765.7	-1.06347	81.168	159.669	186.48	56.5833	4	101.199
3400	4	5	765.569	765.569	-1.06329	81.168	159.695	186.713	56.6667	4	101.306
3405	4	5	765.439	765.439	-1.06311	81.168	159.721	186.945	56.75	4	101.412
3410	4	5	765.308	765.308	-1.06293	81.168	159.746	187.178	56.8333	4	101.518
3415	4	5	765.179	765.179	-1.06275	81.168	159.772	187.411	56.9167	4	101.624
3420	4	5	765.049	765.049	-1.06257	81.168	159.797	187.643	57	4	101.731
3425	4	5	764.92	764.92	-1.06239	81.168	159.822	187.876	57.0833	4	101.837
3430	4	5	764.791	764.791	-1.06221	81.168	159.847	188.108	57.1667	4	101.943
3435	4	5	764.663	764.663	-1.06203	81.168	159.872	188.34	57.25	4	102.049
3440	4	5	764.535	764.535	-1.06185	81.168	159.897	188.573	57.3333	4	102.156
3445	4	5	764.408	764.408	-1.06168	81.168	159.921	188.805	57.4167	4	102.262
3450	4	5	764.28	764.28	-1.0615	81.168	159.946	189.037	57.5	4	102.368
3455	4	5	764.154	764.154	-1.06132	81.168	159.971	189.269	57.5833	4	102.474
3460	4	5	764.027	764.027	-1.06115	81.168	159.995	189.501	57.6667	4	102.58
3465	4	5	763.901	763.901	-1.06097	81.168	160.019	189.733	57.75	4	102.686
3470	4	5	763.776	763.776	-1.0608	81.168	160.043	189.965	57.8333	4	102.792
3475	4	5	763.651	763.651	-1.06063	81.168	160.067	190.197	57.9167	4	102.898
3480	4	5	763.526	763.526	-1.06045	81.168	160.091	190.429	58	4	103.004
3485	4	5	763.401	763.401	-1.06028	81.168	160.115	190.661	58.0833	4	103.11
3490	4	5	763.277	763.277	-1.06011	81.168	160.139	190.892	58.1667	4	103.216
3495	4	5	763.153	763.153	-1.05994	81.168	160.162	191.124	58.25	4	103.322
3500	4	5	763.03	763.03	-1.05976	81.168	160.186	191.355	58.3333	4	103.428
3505	4	5	762.907	762.907	-1.05959	81.168	160.209	191.587	58.4167	4	103.534
3510	4	5	762.784	762.784	-1.05942	81.168	160.233	191.818	58.5	4	103.64
3515	4	5	762.662	762.662	-1.05925	81.168	160.256	192.05	58.5833	4	103.746
3520	4	5	762.54	762.54	-1.05908	81.168	160.279	192.281	58.6667	4	103.852
3525	4	5	762.419	762.419	-1.05891	81.168	160.302	192.512	58.75	4	103.958
3530	4	5	762.298	762.298	-1.05875	81.168	160.325	192.743	58.8333	4	104.064
3535	4	5	762.177	762.177	-1.05858	81.168	160.347	192.974	58.9167	4	104.17
3540	4	5	762.056	762.056	-1.05841	81.168	160.37	193.205	59	4	104.276
3545	4	5	761.936	761.936	-1.05824	81.168	160.393	193.436	59.0833	4	104.381
3550	4	5	761.816	761.816	-1.05808	81.168	160.415	193.667	59.1667	4	104.487
3555	4	5	761.697	761.697	-1.05791	81.168	160.437	193.898	59.25	4	104.593
3560	4	5	761.578	761.578	-1.05775	81.168	160.46	194.129	59.3333	4	104.699
3565	4	5	761.459	761.459	-1.05758	81.168	160.482	194.359	59.4167	4	104.805
3570	4	5	761.341	761.341	-1.05742	81.168	160.504	194.59	59.5	4	104.91
3575	4	5	761.223	761.223	-1.05725	81.168	160.526	194.821	59.5833	4	105.016
3580	4	5	761.105	761.105	-1.05709	81.168	160.547	195.051	59.6667	4	105.122
3585	4	5	760.988	760.988	-1.05693	81.168	160.569	195.282	59.75	4	105.227
3590	4	5	760.871	760.871	-1.05677	81.168	160.591	195.512	59.8333	4	105.333
3595	4	5	760.754	760.754	-1.0566	81.168	160.612	195.742	59.9167	4	105.439
3600	4	10	760.522	760.522	-2.11256	81.168	160.655	196.203	60	4	105.65
3610	4	10	760.29	760.29	-2.11192	81.168	160.698	196.663	60.1667	4	105.861
3620	4	10	760.06	760.06	-2.11128	81.168	160.74	197.123	60.3333	4	106.072
3630	4	10	759.832	759.832	-2.11064	81.168	160.781	197.583	60.5	4	106.283
3640	4	10	759.605	759.605	-2.11001	81.168	160.823	198.042	60.6667	4	106.494
3650	4	10	759.379	759.379	-2.10938	81.168	160.864	198.502	60.8333	4	106.705
3660	4	10	759.154	759.154	-2.10876	81.168	160.904	198.961	61	4	106.916
3670	4	10	758.93	758.93	-2.10814	81.168	160.944	199.419	61.1667	4	107.127
3680	4	10	758.708	758.708	-2.10752	81.168	160.984	199.878	61.3333	4	107.338
3690	4	10	758.487	758.487	-2.10691	81.168	161.024	200.336	61.5	4	107.549
3700	4	10	758.268	758.268	-2.1063	81.168	161.063	200.794	61.6667	4	107.759
3710	4	10	758.049	758.049	-2.10569	81.168	161.101	201.252	61.8333	4	107.97
3720	4	10	757.832	757.832	-2.10509	81.168	161.14	201.709	62	4	108.18
3730	4	10	757.616	757.616	-2.10449	81.168	161.178	202.167	62.1667	4	108.391
3740	4	10	757.401	757.401	-2.10389	81.168	161.215	202.624	62.3333	4	108.601
3750	4	10	757.188	757.188	-2.1033	81.168	161.253	203.08	62.5	4	108.811
3760	4	10	756.975	756.975	-2.10271	81.168	161.29	203.537	62.6667	4	109.022
3770	4	10	756.764	756.764	-2.10212	81.168	161.326	203.993	62.8333	4	109.232
3780	4	10	756.554	756.554	-2.10154	81.168	161.363	204.449	63	4	109.442
3790	4	10	756.345	756.345	-2.10096	81.168	161.399	204.905	63.1667	4	109.652
3800	4	10	756.137	756.137	-2.10038	81.168	161.434	205.36	63.3333	4	109.862
3810	4	10	755.93	755.93	-2.09981	81.168	161.47	205.815	63.5	4	110.072
3820	4	10	755.725	755.725	-2.09924	81.168	161.505	206.27	63.6667	4	110.282
3830	4	10	755.52	755.52	-2.09867	81.168	161.539	206.725	63.8333	4	110.492
3840	4	10	755.317	755.317	-2.0981	81.168	161.574	207.18	64	4	110.702
3850	4	10	755.115	755.115	-2.09754	81.168	161.608	207.634	64.1667	4	110.911
3860	4	10	754.913	754.913	-2.09698	81.168	161.642	208.088	64.3333	4	111.121
3870	4	10	754.713	754.713	-2.09643	81.168	161.675	208.542	64.5	4	111.331
3880	4	10	754.514	754.514	-2.09587	81.168	161.708	208.995	64.6667	4	111.54
3890	4	10	754.316	754.316	-2.09532	81.168	161.741	209.448	64.8333	4	111.75
3900	4	10	754.119	754.119	-2.09478	81.168	161.773	209.901	65	4	111.959
3910	4	10	753.923	753.923	-2.09423	81.168	161.806	210.354	65.1667	4	112.169
3920	4	10	753.728	753.728	-2.09369	81.168	161.838	210.806	65.3333	4	112.378
3930	4	10	753.534	753.534	-2.09315	81.168	161.869	211.259	65.5	4	112.588
3940	4	10	753.342	753.342	-2.09262	81.168	161.9	211.711	65.6667	4	112.797
3950	4	10	753.15	753.15	-2.09208	81.168	161.932	212.162	65.8333	4	113.006
3960	4	10	752.959	752.959	-2.09155	81.168	161.962	212.614	66	4	113.215
3970	4	10	752.769	752.769	-2.09102	81.168	161.993	213.065	66.1667	4	113.424
3980	4	10	752.58	752.58	-2.0905	81.168	162.023	213.516	66.3333	4	113.633
3990	4	10	752.392	752.392	-2.08998	81.168	162.053	213.967	66.5	4	113.842
4000	4	10	752.205	752.205	-2.08946	81.168	162.083	214.417	66.6667	4	114.051
4010	4	10	752.019	752.019	-2.08894	81.168	162.112	214.868	66.8333	4	114.26
4020	4	10	751.834	751.834	-2.08843	81.168	162.141	215.318	67	4	114.469
4030	4	10	751.649	751.649	-2.08791	81.168	162.17	215.767	67.1667	4	114.678
4040	4	10	751.466	751.466	-2.08741	81.168	162.198	216.217	67.3333	4	114.887
4050	4	10	751.284	751.284	-2.0869	81.168	162.227	216.666	67.5	4	115.095
4060	4	10	751.102	751.102	-2.08639	81.168	162.255	217.115	67.6667	4	115.304
4070	4	10	750.922	750.922	-2.08589	81.168	162.283	217.564	67.8333	4	115.512
4080	4	10	750.742	750.742	-2.08539	81.168	162.31	218.012	68	4	115.721
4090	4	10	750.563	750.563	-2.0849	81.168	162.337	218.461	68.1667	4	115.929
4100	4	10	750.385	750.385	-2.0844	81.168	162.365	218.909	68.3333	4	116.138
4110	4	10	750.208	750.208	-2.08391	81.168	162.391	219.356	68.5	4	116.346
4120	4	10	750.032	750.032	-2.08342	81.168	162.418	219.804	68.6667	4	116.555
4130	4	10	749.856	749.856	-2.08293	81.168	162.444	220.251	68.8333	4	116.763
4140	4	10	749.682	749.682	-2.08245	81.168	162.47	220.698	69	4	116.971
4150	4	10	749.508	749.508	-2.08197	81.168	162.496	221.145	69.1667	4	117.179
4160	4	10	749.335	749.335	-2.08149	81.168	162.522	221.592	69.3333	4	117.388
4170	4	10	749.163	749.163	-2.08101	81.168	162.547	222.038	69.5	4	117.596
4180	4	10	748.992	748.992	-2.08053	81.168	162.572	222.484	69.6667	4	117.804
4190	4	10	748.822	748.822	-2.08006	81.168	162.597	222.93	69.8333	4	118.012
4200	4	10	748.652	748.652	-2.07959	81.168	162.622	223.375	70	4	118.22
4210	4	10	748.483	748.483	-2.07912	81.168	162.646	223.821	70.1667	4	118.428
4220	4	10	748.315	748.315	-2.07865	81.168	162.67	224.266	70.3333	4	118.635
4230	4	10	748.148	748.148	-2.07819	81.168	162.694	224.711	70.5	4	118.843
4240	4	10	747.981	747.981	-2.07773	81.168	162.718	225.155	70.6667	4	119.051
4250	4	10	747.816	747.816	-2.07727	81.168	162.742	225.6	70.8333	4	119.259
4260	4	10	747.651	747.651	-2.07681	81.168	162.765	226.044	71	4	119.466
4270	4	10	747.487	747.487	-2.07635	81.168	162.788	226.487	71.1667	4	119.674
4280	4	10	747.323	747.323	-2.0759	81.168	162.811	226.931	71.3333	4	119.882
4290	4	10	747.16	747.16	-2.07545	81.168	162.834	227.374	71.5	4	120.089
4300	4	10	746.998	746.998	-2.075	81.168	162.856	227.818	71.6667	4	120.297
4310	4	10	746.837	746.837	-2.07455	81.168	162.878	228.26	71.8333	4	120.504
4320	4	10	746.677	746.677	-2.0741	81.168	162.901	228.703	72	4	120.712
4330	4	10	746.517	746.517	-2.07366	81.168	162.922	229.145	72.1667	4	120.919
4340	4	10	746.358	746.358	-2.07322	81.168	162.944	229.588	72.3333	4	121.126
4350	4	10	746.199	746.199	-2.07278	81.168	162.966	230.029	72.5	4	121.334
4360	4	10	746.042	746.042	-2.07234	81.168	162.987	230.471	72.6667	4	121.541
4370	4	10	745.885	745.885	-2.0719	81.168	163.008	230.913	72.8333	4	121.748
4380	4	10	745.728	745.728	-2.07147	81.168	163.029	231.354	73	4	121.955
4390	4	10	745.573	745.573	-2.07104	81.168	163.05	231.795	73.1667	4	122.162
4400	4	10	745.418	745.418	-2.07061	81.168	163.07	232.235	73.3333	4	122.369
4410	4	10	745.264	745.264	-2.07018	81.168	163.09	232.676	73.5	4	122.576
4420	4	10	745.11	745.11	-2.06975	81.168	163.111	233.116	73.6667	4	122.783
4430	4	10	744.957	744.957	-2.06933	81.168	163.131	233.556	73.8333	4	122.99
4440	4	10	744.805	744.805	-2.0689	81.168	163.15	233.996	74	4	123.197
4450	4	10	744.653	744.653	-2.06848	81.168	163.17	234.435	74.1667	4	123.404
4460	4	10	744.502	744.502	-2.06806	81.168	163.189	234.874	74.3333	4	123.611
4470	4	10	744.352	744.352	-2.06764	81.168	163.209	235.313	74.5	4	123.817
4480	4	10	744.202	744.202	-2.06723	81.168	163.228	235.752	74.6667	4	124.024
4490	4	10	744.053	744.053	-2.06681	81.168	163.246	236.191	74.8333	4	124.231
4500	4	10	743.904	743.904	-2.0664	81.168	163.265	236.629	75	4	124.438
4510	4	10	743.756	743.756	-2.06599	81.168	163.284	237.067	75.1667	4	124.644
4520	4	10	743.609	743.609	-2.06558	81.168	163.302	237.505	75.3333	4	124.851
4530	4	10	743.462	743.462	-2.06517	81.168	163.32	237.942	75.5	4	125.057
4540	4	10	743.316	743.316	-2.06477	81.168	163.338	238.38	75.6667	4	125.264
4550	4	10	743.171	743.171	-2.06436	81.168	163.356	238.817	75.8333	4	125.47
4560	4	10	743.026	743.026	-2.06396	81.168	163.374	239.254	76	4	125.677
4570	4	10	742.881	742.881	-2.06356	81.168	163.391	239.69	76.1667	4	125.883
4580	4	10	742.738	742.738	-2.06316	81.168	163.409	240.126	76.3333	4	126.089
4590	4	10	742.594	742.594	-2.06276	81.168	163.426	240.563	76.5	4	126.295
4600	4	10	742.452	742.452	-2.06237	81.168	163.443	240.998	76.6667	4	126.502
4610	4	10	742.31	742.31	-2.06197	81.168	163.46	241.434	76.8333	4	126.708
4620	4	10	742.168	742.168	-2.06158	81.168	163.477	241.869	77	4	126.914
4630	4	10	742.027	742.027	-2.06119	81.168	163.493	242.305	77.1667	4	127.12
4640	4	10	741.887	741.887	-2.0608	81.168	163.51	242.739	77.3333	4	127.326
4650	4	10	741.747	741.747	-2.06041	81.168	163.526	243.174	77.5	4	127.532
4660	4	10	741.608	741.608	-2.06002	81.168	163.542	243.609	77.6667	4	127.738
4670	4	10	741.469	741.469	-2.05964	81.168	163.558	244.043	77.8333	4	127.944
4680	4	10	741.331	741.331	-2.05925	81.168	163.574	244.477	78	4	128.15
4690	4	10	741.193	741.193	-2.05887	81.168	163.59	244.91	78.1667	4	128.356
4700	4	10	741.056	741.056	-2.05849	81.168	163.605	245.344	78.3333	4	128.562
4710	4	10	740.919	740.919	-2.05811	81.168	163.621	245.777	78.5	4	128.768
4720	4	10	740.783	740.783	-2.05773	81.168	163.636	246.21	78.6667	4	128.974
4730	4	10	740.648	740.648	-2.05735	81.168	163.651	246.643	78.8333	4	129.179
4740	4	10	740.512	740.512	-2.05698	81.168	163.666	247.075	79	4	129.385
4750	4	10	740.378	740.378	-2.0566	81.168	163.681	247.508	79.1667	4	129.591
4760	4	10	740.244	740.244	-2.05623	81.168	163.696	247.94	79.3333	4	129.796
4770	4	10	740.11	740.11	-2.05586	81.168	163.71	248.372	79.5	4	130.002
4780	4	10	739.977	739.977	-2.05549	81.168	163.725	248.803	79.6667	4	130.207
4790	4	10	739.844	739.844	-2.05512	81.168	163.739	249.234	79.8333	4	130.413
4800	4	10	739.712	739.712	-2.05476	81.168	163.753	249.666	80	4	130.618
4810	4	10	739.58	739.58	-2.05439	81.168	163.767	250.096	80.1667	4	130.824
4820	4	10	739.449	739.449	-2.05402	81.168	163.781	250.527	80.3333	4	131.029
4830	4	10	739.318	739.318	-2.05366	81.168	163.795	250.957	80.5	4	131.235
4840	4	10	739.188	739.188	-2.0533	81.168	163.809	251.388	80.6667	4	131.44
4850	4	10	739.058	739.058	-2.05294	81.168	163.822	251.818	80.8333	4	131.645
4860	4	10	738.929	738.929	-2.05258	81.168	163.836	252.247	81	4	131.85
4870	4	10	738.8	738.8	-2.05222	81.168	163.849	252.677	81.1667	4	132.056
4880	4	10	738.671	738.671	-2.05186	81.168	163.862	253.106	81.3333	4	132.261
4890	4	10	738.543	738.543	-2.05151	81.168	163.875	253.535	81.5	4	132.466
4900	4	10	738.416	738.416	-2.05115	81.168	163.888	253.964	81.6667	4	132.671
4910	4	10	738.288	738.288	-2.0508	81.168	163.901	254.392	81.8333	4	132.876
4920	4	10	738.162	738.162	-2.05045	81.168	163.914	254.82	82	4	133.081
4930	4	10	738.035	738.035	-2.0501	81.168	163.926	255.248	82.1667	4	133.286
4940	4	10	737.909	737.909	-2.04975	81.168	163.939	255.676	82.3333	4	133.491
4950	4	10	737.784	737.784	-2.0494	81.168	163.951	256.104	82.5	4	133.696
4960	4	10	737.659	737.659	-2.04905	81.168	163.964	256.531	82.6667	4	133.901
4970	4	10	737.534	737.534	-2.04871	81.168	163.976	256.958	82.8333	4	134.106
4980	4	10	737.41	737.41	-2.04836	81.168	163.988	257.385	83	4	134.311
4990	4	10	737.286	737.286	-2.04802	81.168	164	257.812	83.1667	4	134.516
5000	4	10	737.163	737.163	-2.04767	81.168	164.011	258.238	83.3333	4	134.72
5010	4	10	737.04	737.04	-2.04733	81.168	164.023	258.664	83.5	4	134.925
5020	4	10	736.917	736.917	-2.04699	81.168	164.035	259.09	83.6667	4	135.13
5030	4	10	736.795	736.795	-2.04665	81.168	164.046	259.516	83.8333	4	135.334
5040	4	10	736.673	736.673	-2.04632	81.168	164.058	259.941	84	4	135.539
5050	4	10	736.552	736.552	-2.04598	81.168	164.069	260.366	84.1667	4	135.744
5060	4	10	736.431	736.431	-2.04564	81.168	164.08	260.791	84.3333	4	135.948
5070	4	10	736.31	736.31	-2.04531	81.168	164.091	261.216	84.5	4	136.153
5080	4	10	736.19	736.19	-2.04497	81.168	164.102	261.641	84.6667	4	136.357
5090	4	10	736.07	736.07	-2.04464	81.168	164.113	262.065	84.8333	4	136.562
5100	4	10	735.951	735.951	-2.04431	81.168	164.124	262.489	85	4	136.766
5110	4	10	735.832	735.832	-2.04398	81.168	164.134	262.913	85.1667	4	136.971
5120	4	10	735.713	735.713	-2.04365	81.168	164.145	263.336	85.3333	4	137.175
5130	4	10	735.595	735.595	-2.04332	81.168	164.155	263.76	85.5	4	137.379
5140	4	10	735.477	735.477	-2.04299	81.168	164.166	264.183	85.6667	4	137.584
5150	4	10	735.359	735.359	-2.04266	81.168	164.176	264.606	85.8333	4	137.788
5160	4	10	735.242	735.242	-2.04234	81.168	164.186	265.028	86	4	137.992
5170	4	10	735.125	735.125	-2.04201	81.168	164.196	265.451	86.1667	4	138.196
5180	4	10	735.008	735.008	-2.04169	81.168	164.206	265.873	86.3333	4	138.4
5190	4	10	734.892	734.892	-2.04137	81.168	164.216	266.295	86.5	4	138.605
5200	4	10	734.776	734.776	-2.04104	81.168	164.226	266.716	86.6667	4	138.809
5210	4	10	734.66	734.66	-2.04072	81.168	164.236	267.138	86.8333	4	139.013
5220	4	10	734.545	734.545	-2.0404	81.168	164.245	267.559	87	4	139.217
5230	4	10	734.43	734.43	-2.04008	81.168	164.255	267.98	87.1667	4	139.421
5240	4	10	734.316	734.316	-2.03977	81.168	164.264	268.401	87.3333	4	139.625
5250	4	10	734.201	734.201	-2.03945	81.168	164.274	268.822	87.5	4	139.829
5260	4	10	734.088	734.088	-2.03913	81.168	164.283	269.242	87.6667	4	140.033
5270	4	10	733.974	733.974	-2.03882	81.168	164.292	269.662	87.8333	4	140.236
5280	4	10	733.861	733.861	-2.0385	81.168	164.301	270.082	88	4	140.44
5290	4	10	733.748	733.748	-2.03819	81.168	164.311	270.501	88.1667	4	140.644
5300	4	10	733.635	733.635	-2.03788	81.168	164.319	270.921	88.3333	4	140.848
5310	4	10	733.523	733.523	-2.03756	81.168	164.328	271.34	88.5	4	141.052
5320	4	10	733.411	733.411	-2.03725	81.168	164.337	271.759	88.6667	4	141.255
5330	4	10	733.299	733.299	-2.03694	81.168	164.346	272.178	88.8333	4	141.459
5340	4	10	733.188	733.188	-2.03663	81.168	164.354	272.596	89	4	141.663
5350	4	10	733.077	733.077	-2.03632	81.168	164.363	273.014	89.1667	4	141.866
5360	4	10	732.966	732.966	-2.03602	81.168	164.372	273.432	89.3333	4	142.07
5370	4	10	732.856	732.856	-2.03571	81.168	164.38	273.85	89.5	4	142.274
5380	4	10	732.746	732.746	-2.0354	81.168	164.388	274.268	89.6667	4	142.477
5390	4	10	732.636	732.636	-2.0351	81.168	164.396	274.685	89.8333	4	142.681
5400	4	10	732.526	732.526	-2.0348	81.168	164.405	275.102	90	4	142.884
5410	4	10	732.417	732.417	-2.03449	81.168	164.413	275.519	90.1667	4	143.088
5420	4	10	732.308	732.308	-2.03419	81.168	164.421	275.936	90.3333	4	143.291
5430	4	10	732.199	732.199	-2.03389	81.168	164.429	276.352	90.5	4	143.494
5440	4	10	732.091	732.091	-2.03359	81.168	164.437	276.768	90.6667	4	143.698
5450	4	10	731.983	731.983	-2.03329	81.168	164.444	277.184	90.8333	4	143.901
5460	4	10	731.875	731.875	-2.03299	81.168	164.452	277.6	91	4	144.104
5470	4	10	731.768	731.768	-2.03269	81.168	164.46	278.015	91.1667	4	144.308
5480	4	10	731.66	731.66	-2.03239	81.168	164.467	278.431	91.3333	4	144.511
5490	4	10	731.553	731.553	-2.03209	81.168	164.475	278.846	91.5	4	144.714
5500	4	10	731.447	731.447	-2.0318	81.168	164.482	279.261	91.6667	4	144.917
5510	4	10	731.34	731.34	-2.0315	81.168	164.49	279.675	91.8333	4	145.12
5520	4	10	731.234	731.234	-2.03121	81.168	164.497	280.089	92	4	145.324
5530	4	10	731.128	731.128	-2.03091	81.168	164.504	280.504	92.1667	4	145.527
5540	4	10	731.022	731.022	-2.03062	81.168	164.511	280.918	92.3333	4	145.73
5550	4	10	730.917	730.917	-2.03032	81.168	164.519	281.331	92.5	4	145.933
5560	4	10	730.812	730.812	-2.03003	81.168	164.526	281.745	92.6667	4	146.136
5570	4	10	730.707	730.707	-2.02974	81.168	164.533	282.158	92.8333	4	146.339
5580	4	10	730.602	730.602	-2.02945	81.168	164.54	282.571	93	4	146.542
5590	4	10	730.498	730.498	-2.02916	81.168	164.546	282.984	93.1667	4	146.745
5600	4	10	730.394	730.394	-2.02887	81.168	164.553	283.396	93.3333	4	146.947
5610	4	10	730.29	730.29	-2.02858	81.168	164.56	283.808	93.5	4	147.15
5620	4	10	730.186	730.186	-2.0283	81.168	164.567	284.221	93.6667	4	147.353
5630	4	10	730.083	730.083	-2.02801	81.168	164.573	284.632	93.8333	4	147.556
5640	4	10	729.98	729.98	-2.02772	81.168	164.58	285.044	94	4	147.759
5650	4	10	729.877	729.877	-2.02744	81.168	164.586	285.455	94.1667	4	147.961
5660	4	10	729.775	729.775	-2.02715	81.168	164.593	285.867	94.3333	4	148.164
5670	4	10	729.672	729.672	-2.02687	81.168	164.599	286.278	94.5	4	148.367
5680	4	10	729.57	729.57	-2.02658	81.168	164.605	286.688	94.6667	4	148.57
5690	4	10	729.468	729.468	-2.0263	81.168	164.612	287.099	94.8333	4	148.772
5700	4	10	729.366	729.366	-2.02602	81.168	164.618	287.509	95	4	148.975
5710	4	10	729.265	729.265	-2.02574	81.168	164.624	287.919	95.1667	4	149.177
5720	4	10	729.164	729.164	-2.02545	81.168	164.63	288.329	95.3333	4	149.38
5730	4	10	729.063	729.063	-2.02517	81.168	164.636	288.738	95.5	4	149.582
5740	4	10	728.962	728.962	-2.02489	81.168	164.642	289.148	95.6667	4	149.785
5750	4	10	728.861	728.861	-2.02462	81.168	164.648	289.557	95.8333	4	149.987
5760	4	10	728.761	728.761	-2.02434	81.168	164.654	289.966	96	4	150.19
5770	4	10	728.661	728.661	-2.02406	81.168	164.66	290.375	96.1667	4	150.392
5780	4	10	728.561	728.561	-2.02378	81.168	164.665	290.783	96.3333	4	150.595
5790	4	10	728.461	728.461	-2.0235	81.168	164.671	291.191	96.5	4	150.797
5800	4	10	728.362	728.362	-2.02323	81.168	164.677	291.599	96.6667	4	150.999
5810	4	10	728.263	728.263	-2.02295	81.168	164.682	292.007	96.8333	4	151.202
5820	4	10	728.164	728.164	-2.02268	81.168	164.688	292.415	97	4	151.404
5830	4	10	728.065	728.065	-2.0224	81.168	164.693	292.822	97.1667	4	151.606
5840	4	10	727.966	727.966	-2.02213	81.168	164.699	293.229	97.3333	4	151.808
5850	4	10	727.868	727.868	-2.02186	81.168	164.704	293.636	97.5	4	152.01
5860	4	10	727.77	727.77	-2.02158	81.168	164.71	294.043	97.6667	4	152.213
5870	4	10	727.672	727.672	-2.02131	81.168	164.715	294.449	97.8333	4	152.415
5880	4	10	727.574	727.574	-2.02104	81.168	164.72	294.855	98	4	152.617
5890	4	10	727.477	727.477	-2.02077	81.168	164.725	295.261	98.1667	4	152.819
5900	4	10	727.379	727.379	-2.0205	81.168	164.73	295.667	98.3333	4	153.021
5910	4	10	727.282	727.282	-2.02023	81.168	164.736	296.073	98.5	4	153.223
5920	4	10	727.185	727.185	-2.01996	81.168	164.741	296.478	98.6667	4	153.425
5930	4	10	727.088	727.088	-2.01969	81.168	164.746	296.883	98.8333	4	153.627
5940	4	10	726.992	726.992	-2.01942	81.168	164.751	297.288	99	4	153.829
5950	4	10	726.895	726.895	-2.01915	81.168	164.756	297.693	99.1667	4	154.031
5960	4	10	726.799	726.799	-2.01889	81.168	164.76	298.097	99.3333	4	154.233
5970	4	10	726.703	726.703	-2.01862	81.168	164.765	298.501	99.5	4	154.435
5980	4	10	726.608	726.608	-2.01835	81.168	164.77	298.905	99.6667	4	154.636
5990	4	10	726.512	726.512	-2.01809	81.168	164.775	299.309	99.8333	4	154.838
6000	4	10	726.416	726.416	-2.01782	81.168	164.779	299.713	100	4	155.04
6010	4	10	726.321	726.321	-2.01756	81.168	164.784	300.116	100.167	4	155.242
6020	4	10	726.226	726.226	-2.0173	81.168	164.789	300.519	100.333	4	155.443
6030	4	10	726.131	726.131	-2.01703	81.168	164.793	300.922	100.5	4	155.645
6040	4	10	726.037	726.037	-2.01677	81.168	164.798	301.325	100.667	4	155.847
6050	4	10	725.942	725.942	-2.01651	81.168	164.802	301.727	100.833	4	156.048
6060	4	10	725.848	725.848	-2.01624	81.168	164.807	302.129	101	4	156.25
6070	4	10	725.754	725.754	-2.01598	81.168	164.811	302.531	101.167	4	156.452
6080	4	10	725.66	725.66	-2.01572	81.168	164.816	302.933	101.333	4	156.653
6090	4	10	725.566	725.566	-2.01546	81.168	164.82	303.335	101.5	4	156.855
6100	4	10	725.472	725.472	-2.0152	81.168	164.824	303.736	101.667	4	157.056
6110	4	10	725.379	725.379	-2.01494	81.168	164.828	304.137	101.833	4	157.258
6120	4	10	725.286	725.286	-2.01468	81.168	164.833	304.538	102	4	157.459
6130	4	10	725.193	725.193	-2.01442	81.168	164.837	304.939	102.167	4	157.661
6140	4	10	725.1	725.1	-2.01417	81.168	164.841	305.339	102.333	4	157.862
6150	4	10	725.007	725.007	-2.01391	81.168	164.845	305.74	102.5	4	158.064
6160	4	10	724.914	724.914	-2.01365	81.168	164.849	306.14	102.667	4	158.265
6170	4	10	724.822	724.822	-2.01339	81.168	164.853	306.539	102.833	4	158.466
6180	4	10	724.73	724.73	-2.01314	81.168	164.857	306.939	103	4	158.668
6190	4	10	724.637	724.637	-2.01288	81.168	164.861	307.338	103.167	4	158.869
6200	4	10	724.546	724.546	-2.01263	81.168	164.865	307.737	103.333	4	159.07
6210	4	10	724.454	724.454	-2.01237	81.168	164.869	308.136	103.5	4	159.271
6220	4	10	724.362	724.362	-2.01212	81.168	164.873	308.535	103.667	4	159.473
6230	4	10	724.271	724.271	-2.01186	81.168	164.876	308.934	103.833	4	159.674
6240	4	10	724.179	724.179	-2.01161	81.168	164.88	309.332	104	4	159.875
6250	4	10	724.088	724.088	-2.01136	81.168	164.884	309.73	104.167	4	160.076
6260	4	10	723.997	723.997	-2.0111	81.168	164.888	310.128	104.333	4	160.277
6270	4	10	723.906	723.906	-2.01085	81.168	164.891	310.525	104.5	4	160.478
6280	4	10	723.816	723.816	-2.0106	81.168	164.895	310.923	104.667	4	160.679
6290	4	10	723.725	723.725	-2.01035	81.168	164.899	311.32	104.833	4	160.88
6300	4	10	723.635	723.635	-2.0101	81.168	164.902	311.717	105	4	161.081
6310	4	10	723.545	723.545	-2.00985	81.168	164.906	312.114	105.167	4	161.282
6320	4	10	723.455	723.455	-2.0096	81.168	164.909	312.51	105.333	4	161.483
6330	4	10	723.365	723.365	-2.00935	81.168	164.913	312.906	105.5	4	161.684
6340	4	10	723.275	723.275	-2.0091	81.168	164.916	313.302	105.667	4	161.885
6350	4	10	723.185	723.185	-2.00885	81.168	164.919	313.698	105.833	4	162.086
6360	4	10	723.096	723.096	-2.0086	81.168	164.923	314.094	106	4	162.287
6370	4	10	723.007	723.007	-2.00835	81.168	164.926	314.489	106.167	4	162.488
6380	4	10	722.917	722.917	-2.0081	81.168	164.929	314.885	106.333	4	162.689
6390	4	10	722.828	722.828	-2.00786	81.168	164.933	315.28	106.5	4	162.889
6400	4	10	722.739	722.739	-2.00761	81.168	164.936	315.674	106.667	4	163.09
6410	4	10	722.651	722.651	-2.00736	81.168	164.939	316.069	106.833	4	163.291
6420	4	10	722.562	722.562	-2.00712	81.168	164.942	316.463	107	4	163.492
6430	4	10	722.474	722.474	-2.00687	81.168	164.946	316.857	107.167	4	163.692
6440	4	10	722.385	722.385	-2.00663	81.168	164.949	317.251	107.333	4	163.893
6450	4	10	722.297	722.297	-2.00638	81.168	164.952	317.645	107.5	4	164.094
6460	4	10	722.209	722.209	-2.00614	81.168	164.955	318.038	107.667	4	164.294
6470	4	10	722.121	722.121	-2.00589	81.168	164.958	318.432	107.833	4	164.495
6480	4	10	722.033	722.033	-2.00565	81.168	164.961	318.825	108	4	164.695
6490	4	10	721.946	721.946	-2.0054	81.168	164.964	319.218	108.167	4	164.896
6500	4	10	721.858	721.858	-2.00516	81.168	164.967	319.61	108.333	4	165.096
6510	4	10	721.771	721.771	-2.00492	81.168	164.97	320.003	108.5	4	165.297
6520	4	10	721.683	721.683	-2.00468	81.168	164.973	320.395	108.667	4	165.497
6530	4	10	721.596	721.596	-2.00443	81.168	164.976	320.787	108.833	4	165.698
6540	4	10	721.509	721.509	-2.00419	81.168	164.979	321.178	109	4	165.898
6550	4	10	721.422	721.422	-2.00395	81.168	164.981	321.57	109.167	4	166.099
6560	4	10	721.336	721.336	-2.00371	81.168	164.984	321.961	109.333	4	166.299
6570	4	10	721.249	721.249	-2.00347	81.168	164.987	322.352	109.5	4	166.499
6580	4	10	721.163	721.163	-2.00323	81.168	164.99	322.743	109.667	4	166.7
6590	4	10	721.076	721.076	-2.00299	81.168	164.992	323.134	109.833	4	166.9
6600	4	10	720.99	720.99	-2.00275	81.168	164.995	323.524	110	4	167.1
6610	4	10	720.904	720.904	-2.00251	81.168	164.998	323.915	110.167	4	167.3
6620	4	10	720.818	720.818	-2.00227	81.168	165	324.305	110.333	4	167.501
6630	4	10	720.732	720.732	-2.00203	81.168	165.003	324.694	110.5	4	167.701
6640	4	10	720.646	720.646	-2.0018	81.168	165.006	325.084	110.667	4	167.901
6650	4	10	720.561	720.561	-2.00156	81.168	165.008	325.473	110.833	4	168.101
6660	4	10	720.475	720.475	-2.00132	81.168	165.011	325.863	111	4	168.301
6670	4	10	720.39	720.39	-2.00108	81.168	165.013	326.252	111.167	4	168.501
6680	4	10	720.305	720.305	-2.00085	81.168	165.016	326.64	111.333	4	168.702
6690	4	10	720.219	720.219	-2.00061	81.168	165.018	327.029	111.5	4	168.902
6700	4	10	720.134	720.134	-2.00037	81.168	165.021	327.417	111.667	4	169.102
6710	4	10	720.049	720.049	-2.00014	81.168	165.023	327.805	111.833	4	169.302
6720	4	10	719.965	719.965	-1.9999	81.168	165.026	328.193	112	4	169.502
6730	4	10	719.88	719.88	-1.99967	81.168	165.028	328.581	112.167	4	169.702
6740	4	10	719.795	719.795	-1.99943	81.168	165.031	328.968	112.333	4	169.902
6750	4	10	719.711	719.711	-1.9992	81.168	165.033	329.355	112.5	4	170.101
6760	4	10	719.627	719.627	-1.99896	81.168	165.035	329.742	112.667	4	170.301
6770	4	10	719.542	719.542	-1.99873	81.168	165.038	330.129	112.833	4	170.501
6780	4	10	719.458	719.458	-1.9985	81.168	165.04	330.516	113	4	170.701
6790	4	10	719.374	719.374	-1.99826	81.168	165.042	330.902	113.167	4	170.901
6800	4	10	719.29	719.29	-1.99803	81.168	165.044	331.288	113.333	4	171.101
6810	4	10	719.207	719.207	-1.9978	81.168	165.047	331.674	113.5	4	171.3
6820	4	10	719.123	719.123	-1.99756	81.168	165.049	332.06	113.667	4	171.5
6830	4	10	719.039	719.039	-1.99733	81.168	165.051	332.446	113.833	4	171.7
6840	4	10	718.956	718.956	-1.9971	81.168	165.053	332.831	114	4	171.9
6850	4	10	718.873	718.873	-1.99687	81.168	165.055	333.216	114.167	4	172.099
6860	4	10	718.789	718.789	-1.99664	81.168	165.057	333.601	114.333	4	172.299
6870	4	10	718.706	718.706	-1.99641	81.168	165.06	333.986	114.5	4	172.499
6880	4	10	718.623	718.623	-1.99618	81.168	165.062	334.37	114.667	4	172.698
6890	4	10	718.54	718.54	-1.99595	81.168	165.064	334.755	114.833	4	172.898
6900	4	10	718.457	718.457	-1.99572	81.168	165.066	335.139	115	4	173.097
6910	4	10	718.375	718.375	-1.99549	81.168	165.068	335.522	115.167	4	173.297
6920	4	10	718.292	718.292	-1.99526	81.168	165.07	335.906	115.333	4	173.497
6930	4	10	718.21	718.21	-1.99503	81.168	165.072	336.289	115.5	4	173.696
6940	4	10	718.127	718.127	-1.9948	81.168	165.074	336.673	115.667	4	173.896
6950	4	10	718.045	718.045	-1.99457	81.168	165.076	337.056	115.833	4	174.095
6960	4	10	717.963	717.963	-1.99434	81.168	165.078	337.439	116	4	174.294
6970	4	10	717.881	717.881	-1.99411	81.168	165.08	337.821	116.167	4	174.494
6980	4	10	717.799	717.799	-1.99389	81.168	165.081	338.203	116.333	4	174.693
6990	4	10	717.717	717.717	-1.99366	81.168	165.083	338.586	116.5	4	174.893
7000	4	10	717.635	717.635	-1.99343	81.168	165.085	338.968	116.667	4	175.092
7010	4	10	717.553	717.553	-1.9932	81.168	165.087	339.349	116.833	4	175.291
7020	4	10	717.472	717.472	-1.99298	81.168	165.089	339.731	117	4	175.491
7030	4	10	717.39	717.39	-1.99275	81.168	165.091	340.112	117.167	4	175.69
7040	4	10	717.309	717.309	-1.99252	81.168	165.093	340.493	117.333	4	175.889
7050	4	10	717.227	717.227	-1.9923	81.168	165.094	340.874	117.5	4	176.088
7060	4	10	717.146	717.146	-1.99207	81.168	165.096	341.255	117.667	4	176.287
7070	4	10	717.065	717.065	-1.99185	81.168	165.098	341.635	117.833	4	176.487
7080	4	10	716.984	716.984	-1.99162	81.168	165.1	342.016	118	4	176.686
7090	4	10	716.903	716.903	-1.9914	81.168	165.101	342.396	118.167	4	176.885
7100	4	10	716.822	716.822	-1.99117	81.168	165.103	342.776	118.333	4	177.084
7110	4	10	716.741	716.741	-1.99095	81.168	165.105	343.155	118.5	4	177.283
7120	4	10	716.661	716.661	-1.99072	81.168	165.106	343.535	118.667	4	177.482
7130	4	10	716.58	716.58	-1.9905	81.168	165.108	343.914	118.833	4	177.681
7140	4	10	716.5	716.5	-1.99028	81.168	165.11	344.293	119	4	177.88
7150	4	10	716.419	716.419	-1.99005	81.168	165.111	344.672	119.167	4	178.079
7160	4	10	716.339	716.339	-1.98983	81.168	165.113	345.05	119.333	4	178.278
7170	4	10	716.259	716.259	-1.98961	81.168	165.115	345.429	119.5	4	178.477
7180	4	10	716.179	716.179	-1.98939	81.168	165.116	345.807	119.667	4	178.676
7190	4	10	716.099	716.099	-1.98916	81.168	165.118	346.185	119.833	4	178.875
7200	4	10	716.019	716.019	-1.98894	81.168	165.119	346.563	120	4	179.074
7210	4	10	715.939	715.939	-1.98872	81.168	165.121	346.94	120.167	4	179.273
7220	4	10	715.859	715.859	-1.9885	81.168	165.122	347.318	120.333	4	179.472
7230	4	10	715.779	715.779	-1.98828	81.168	165.124	347.695	120.5	4	179.671
7240	4	10	715.7	715.7	-1.98806	81.168	165.125	348.072	120.667	4	179.869
7250	4	10	715.62	715.62	-1.98783	81.168	165.127	348.448	120.833	4	180.068
7260	4	10	715.541	715.541	-1.98761	81.168	165.128	348.825	121	4	180.267
7270	4	10	715.462	715.462	-1.98739	81.168	165.13	349.201	121.167	4	180.466
7280	4	10	715.382	715.382	-1.98717	81.168	165.131	349.577	121.333	4	180.664
7290	4	10	715.303	715.303	-1.98695	81.168	165.133	349.953	121.5	4	180.863
7300	4	10	715.224	715.224	-1.98673	81.168	165.134	350.329	121.667	4	181.062
7310	4	10	715.145	715.145	-1.98651	81.168	165.135	350.705	121.833	4	181.26
7320	4	10	715.066	715.066	-1.9863	81.168	165.137	351.08	122	4	181.459
7330	4	10	714.987	714.987	-1.98608	81.168	165.138	351.455	122.167	4	181.658
7340	4	10	714.909	714.909	-1.98586	81.168	165.14	351.83	122.333	4	181.856
7350	4	10	714.83	714.83	-1.98564	81.168	165.141	352.204	122.5	4	182.055
7360	4	10	714.751	714.751	-1.98542	81.168	165.142	352.579	122.667	4	182.253
7370	4	10	714.673	714.673	-1.9852	81.168	165.144	352.953	122.833	4	182.452
7380	4	10	714.595	714.595	-1.98498	81.168	165.145	353.327	123	4	182.65
7390	4	10	714.516	714.516	-1.98477	81.168	165.146	353.701	123.167	4	182.849
7400	4	10	714.438	714.438	-1.98455	81.168	165.148	354.075	123.333	4	183.047
7410	4	10	714.36	714.36	-1.98433	81.168	165.149	354.448	123.5	4	183.246
7420	4	10	714.282	714.282	-1.98412	81.168	165.15	354.821	123.667	4	183.444
7430	4	10	714.204	714.204	-1.9839	81.168	165.151	355.194	123.833	4	183.643
7440	4	10	714.126	714.126	-1.98368	81.168	165.153	355.567	124	4	183.841
7450	4	10	714.048	714.048	-1.98347	81.168	165.154	355.94	124.167	4	184.039
7460	4	10	713.97	713.97	-1.98325	81.168	165.155	356.312	124.333	4	184.238
7470	4	10	713.892	713.892	-1.98303	81.168	165.156	356.684	124.5	4	184.436
7480	4	10	713.815	713.815	-1.98282	81.168	165.158	357.056	124.667	4	184.634
7490	4	10	713.737	713.737	-1.9826	81.168	165.159	357.428	124.833	4	184.832
7500	4	10	713.66	713.66	-1.98239	81.168	165.16	357.8	125	4	185.031
7510	4	10	713.582	713.582	-1.98217	81.168	165.161	358.171	125.167	4	185.229
7520	4	10	713.505	713.505	-1.98196	81.168	165.162	358.542	125.333	4	185.427
7530	4	10	713.428	713.428	-1.98174	81.168	165.163	358.913	125.5	4	185.625
7540	4	10	713.351	713.351	-1.98153	81.168	165.165	359.284	125.667	4	185.823
7550	4	10	713.274	713.274	-1.98132	81.168	165.166	359.655	125.833	4	186.022
7560	4	10	713.197	713.197	-1.9811	81.168	165.167	360.025	126	4	186.22
7570	4	10	713.12	713.12	-1.98089	81.168	165.168	360.395	126.167	4	186.418
7580	4	10	713.043	713.043	-1.98067	81.168	165.169	360.765	126.333	4	186.616
7590	4	10	712.966	712.966	-1.98046	81.168	165.17	361.135	126.5	4	186.814
7600	4	10	712.889	712.889	-1.98025	81.168	165.171	361.505	126.667	4	187.012
7610	4	10	712.813	712.813	-1.98003	81.168	165.172	361.874	126.833	4	187.21
7620	4	10	712.736	712.736	-1.97982	81.168	165.173	362.243	127	4	187.408
7630	4	10	712.659	712.659	-1.97961	81.168	165.174	362.612	127.167	4	187.606
7640	4	10	712.583	712.583	-1.9794	81.168	165.175	362.981	127.333	4	187.804
7650	4	10	712.507	712.507	-1.97919	81.168	165.176	363.349	127.5	4	188.002
7660	4	10	712.43	712.43	-1.97897	81.168	165.177	363.718	127.667	4	188.2
7670	4	10	712.354	712.354	-1.97876	81.168	165.178	364.086	127.833	4	188.397
7680	4	10	712.278	712.278	-1.97855	81.168	165.179	364.454	128	4	188.595
7690	4	10	712.202	712.202	-1.97834	81.168	165.18	364.821	128.167	4	188.793
7700	4	10	712.126	712.126	-1.97813	81.168	165.181	365.189	128.333	4	188.991
7710	4	10	712.05	712.05	-1.97792	81.168	165.182	365.556	128.5	4	189.189
7720	4	10	711.974	711.974	-1.97771	81.168	165.183	365.923	128.667	4	189.387
7730	4	10	711.898	711.898	-1.9775	81.168	165.184	366.29	128.833	4	189.584
7740	4	10	711.823	711.823	-1.97728	81.168	165.185	366.657	129	4	189.782
7750	4	10	711.747	711.747	-1.97707	81.168	165.186	367.023	129.167	4	189.98
7760	4	10	711.671	711.671	-1.97686	81.168	165.187	367.39	129.333	4	190.177
7770	4	10	711.596	711.596	-1.97665	81.168	165.188	367.756	129.5	4	190.375
7780	4	10	711.52	711.52	-1.97645	81.168	165.189	368.122	129.667	4	190.573
7790	4	10	711.445	711.445	-1.97624	81.168	165.19	368.488	129.833	4	190.77
7800	4	10	711.37	711.37	-1.97603	81.168	165.191	368.853	130	4	190.968
7810	4	10	711.294	711.294	-1.97582	81.168	165.192	369.218	130.167	4	191.165
7820	4	10	711.219	711.219	-1.97561	81.168	165.192	369.583	130.333	4	191.363
7830	4	10	711.144	711.144	-1.9754	81.168	165.193	369.948	130.5	4	191.561
7840	4	10	711.069	711.069	-1.97519	81.168	165.194	370.313	130.667	4	191.758
7850	4	10	710.994	710.994	-1.97498	81.168	165.195	370.678	130.833	4	191.956
7860	4	10	710.919	710.919	-1.97477	81.168	165.196	371.042	131	4	192.153
7870	4	10	710.844	710.844	-1.97457	81.168	165.197	371.406	131.167	4	192.351
7880	4	10	710.769	710.769	-1.97436	81.168	165.198	371.77	131.333	4	192.548
7890	4	10	710.695	710.695	-1.97415	81.168	165.198	372.134	131.5	4	192.745
7900	4	10	710.62	710.62	-1.97394	81.168	165.199	372.497	131.667	4	192.943
7910	4	10	710.545	710.545	-1.97374	81.168	165.2	372.86	131.833	4	193.14
7920	4	10	710.471	710.471	-1.97353	81.168	165.201	373.223	132	4	193.338
7930	4	10	710.396	710.396	-1.97332	81.168	165.202	373.586	132.167	4	193.535
7940	4	10	710.322	710.322	-1.97312	81.168	165.202	373.949	132.333	4	193.732
7950	4	10	710.248	710.248	-1.97291	81.168	165.203	374.312	132.5	4	193.929
7960	4	10	710.173	710.173	-1.9727	81.168	165.204	374.674	132.667	4	194.127
7970	4	10	710.099	710.099	-1.9725	81.168	165.205	375.036	132.833	4	194.324
7980	4	10	710.025	710.025	-1.97229	81.168	165.206	375.398	133	4	194.521
7990	4	10	709.951	709.951	-1.97209	81.168	165.206	375.76	133.167	4	194.718
8000	4	10	709.877	709.877	-1.97188	81.168	165.207	376.121	133.333	4	194.916
8010	4	10	709.803	709.803	-1.97167	81.168	165.208	376.482	133.5	4	195.113
8020	4	10	709.729	709.729	-1.97147	81.168	165.208	376.844	133.667	4	195.31
8030	4	10	709.655	709.655	-1.97126	81.168	165.209	377.204	133.833	4	195.507
8040	4	10	709.581	709.581	-1.97106	81.168	165.21	377.565	134	4	195.704
8050	4	10	709.507	709.507	-1.97085	81.168	165.211	377.926	134.167	4	195.901
8060	4	10	709.434	709.434	-1.97065	81.168	165.211	378.286	134.333	4	196.098
8070	4	10	709.36	709.36	-1.97044	81.168	165.212	378.646	134.5	4	196.295
8080	4	10	709.287	709.287	-1.97024	81.168	165.213	379.006	134.667	4	196.492
8090	4	10	709.213	709.213	-1.97004	81.168	165.213	379.366	134.833	4	196.689
8100	4	10	709.14	709.14	-1.96983	81.168	165.214	379.725	135	4	196.886
8110	4	10	709.066	709.066	-1.96963	81.168	165.215	380.085	135.167	4	197.083
8120	4	10	708.993	708.993	-1.96943	81.168	165.215	380.444	135.333	4	197.28
8130	4	10	708.92	708.92	-1.96922	81.168	165.216	380.803	135.5	4	197.477
8140	4	10	708.847	708.847	-1.96902	81.168	165.217	381.161	135.667	4	197.674
8150	4	10	708.773	708.773	-1.96882	81.168	165.217	381.52	135.833	4	197.871
8160	4	10	708.7	708.7	-1.96861	81.168	165.218	381.878	136	4	198.068
8170	4	10	708.627	708.627	-1.96841	81.168	165.219	382.236	136.167	4	198.265
8180	4	10	708.554	708.554	-1.96821	81.168	165.219	382.594	136.333	4	198.461
8190	4	10	708.482	708.482	-1.968	81.168	165.22	382.952	136.5	4	198.658
8200	4	10	708.409	708.409	-1.9678	81.168	165.221	383.31	136.667	4	198.855
8210	4	10	708.336	708.336	-1.9676	81.168	165.221	383.667	136.833	4	199.052
8220	4	10	708.263	708.263	-1.9674	81.168	165.222	384.024	137	4	199.249
8230	4	10	708.19	708.19	-1.9672	81.168	165.222	384.381	137.167	4	199.445
8240	4	10	708.118	708.118	-1.96699	81.168	165.223	384.738	137.333	4	199.642
8250	4	10	708.045	708.045	-1.96679	81.168	165.224	385.094	137.5	4	199.839
8260	4	10	707.973	707.973	-1.96659	81.168	165.224	385.451	137.667	4	200.035
8270	4	10	707.9	707.9	-1.96639	81.168	165.225	385.807	137.833	4	200.232
8280	4	10	707.828	707.828	-1.96619	81.168	165.225	386.163	138	4	200.429
8290	4	10	707.756	707.756	-1.96599	81.168	165.226	386.519	138.167	4	200.625
8300	4	10	707.683	707.683	-1.96579	81.168	165.226	386.874	138.333	4	200.822
8310	4	10	707.611	707.611	-1.96559	81.168	165.227	387.23	138.5	4	201.018
8320	4	10	707.539	707.539	-1.96539	81.168	165.228	387.585	138.667	4	201.215
8330	4	10	707.467	707.467	-1.96519	81.168	165.228	387.94	138.833	4	201.411
8340	4	10	707.395	707.395	-1.96499	81.168	165.229	388.295	139	4	201.608
8350	4	10	707.323	707.323	-1.96479	81.168	165.229	388.649	139.167	4	201.804
8360	4	10	707.251	707.251	-1.96459	81.168	165.23	389.004	139.333	4	202.001
8370	4	10	707.179	707.179	-1.96439	81.168	165.23	389.358	139.5	4	202.197
8380	4	10	707.107	707.107	-1.96419	81.168	165.231	389.712	139.667	4	202.394
8390	4	10	707.035	707.035	-1.96399	81.168	165.231	390.066	139.833	4	202.59
8400	4	10	706.964	706.964	-1.96379	81.168	165.232	390.42	140	4	202.786
8410	4	10	706.892	706.892	-1.96359	81.168	165.232	390.773	140.167	4	202.983
8420	4	10	706.82	706.82	-1.96339	81.168	165.233	391.126	140.333	4	203.179
8430	4	10	706.749	706.749	-1.96319	81.168	165.233	391.479	140.5	4	203.375
8440	4	10	706.677	706.677	-1.96299	81.168	165.234	391.832	140.667	4	203.572
8450	4	10	706.606	706.606	-1.96279	81.168	165.234	392.185	140.833	4	203.768
8460	4	10	706.535	706.535	-1.9626	81.168	165.235	392.537	141	4	203.964
8470	4	10	706.463	706.463	-1.9624	81.168	165.235	392.89	141.167	4	204.161
8480	4	10	706.392	706.392	-1.9622	81.168	165.236	393.242	141.333	4	204.357
8490	4	10	706.321	706.321	-1.962	81.168	165.236	393.594	141.5	4	204.553
8500	4	10	706.249	706.249	-1.9618	81.168	165.237	393.945	141.667	4	204.749
8510	4	10	706.178	706.178	-1.96161	81.168	165.237	394.297	141.833	4	204.945
8520	4	10	706.107	706.107	-1.96141	81.168	165.238	394.648	142	4	205.141
8530	4	10	706.036	706.036	-1.96121	81.168	165.238	394.999	142.167	4	205.338
8540	4	10	705.965	705.965	-1.96101	81.168	165.239	395.35	142.333	4	205.534
8550	4	10	705.894	705.894	-1.96082	81.168	165.239	395.701	142.5	4	205.73
8560	4	10	705.823	705.823	-1.96062	81.168	165.239	396.051	142.667	4	205.926
8570	4	10	705.753	705.753	-1.96042	81.168	165.24	396.402	142.833	4	206.122
8580	4	10	705.682	705.682	-1.96023	81.168	165.24	396.752	143	4	206.318
8590	4	10	705.611	705.611	-1.96003	81.168	165.241	397.102	143.167	4	206.514
8600	4	10	705.54	705.54	-1.95983	81.168	165.241	397.452	143.333	4	206.71
8610	4	10	705.47	705.47	-1.95964	81.168	165.242	397.801	143.5	4	206.906
8620	4	10	705.399	705.399	-1.95944	81.168	165.242	398.151	143.667	4	207.102
8630	4	10	705.329	705.329	-1.95925	81.168	165.242	398.5	143.833	4	207.298
8640	4	10	705.258	705.258	-1.95905	81.168	165.243	398.849	144	4	207.494
8650	4	10	705.188	705.188	-1.95886	81.168	165.243	399.198	144.167	4	207.689
8660	4	10	705.117	705.117	-1.95866	81.168	165.244	399.546	144.333	4	207.885
8670	4	10	705.047	705.047	-1.95846	81.168	165.244	399.895	144.5	4	208.081
8680	4	10	704.977	704.977	-1.95827	81.168	165.244	400.243	144.667	4	208.277
8690	4	10	704.907	704.907	-1.95807	81.168	165.245	400.591	144.833	4	208.473
8700	4	10	704.837	704.837	-1.95788	81.168	165.245	400.939	145	4	208.669
8710	4	10	704.766	704.766	-1.95768	81.168	165.246	401.286	145.167	4	208.864
8720	4	10	704.696	704.696	-1.95749	81.168	165.246	401.634	145.333	4	209.06
8730	4	10	704.626	704.626	-1.9573	81.168	165.246	401.981	145.5	4	209.256
8740	4	10	704.556	704.556	-1.9571	81.168	165.247	402.328	145.667	4	209.452
8750	4	10	704.486	704.486	-1.95691	81.168	165.247	402.675	145.833	4	209.647
8760	4	10	704.417	704.417	-1.95671	81.168	165.248	403.022	146	4	209.843
8770	4	10	704.347	704.347	-1.95652	81.168	165.248	403.368	146.167	4	210.039
8780	4	10	704.277	704.277	-1.95632	81.168	165.248	403.715	146.333	4	210.234
8790	4	10	704.207	704.207	-1.95613	81.168	165.249	404.061	146.5	4	210.43
8800	4	10	704.138	704.138	-1.95594	81.168	165.249	404.407	146.667	4	210.625
8810	4	10	704.068	704.068	-1.95574	81.168	165.249	404.753	146.833	4	210.821
8820	4	10	703.998	703.998	-1.95555	81.168	165.25	405.098	147	4	211.017
8830	4	10	703.929	703.929	-1.95536	81.168	165.25	405.443	147.167	4	211.212
8840	4	10	703.859	703.859	-1.95516	81.168	165.25	405.789	147.333	4	211.408
8850	4	10	703.79	703.79	-1.95497	81.168	165.251	406.134	147.5	4	211.603
8860	4	10	703.721	703.721	-1.95478	81.168	165.251	406.478	147.667	4	211.799
8870	4	10	703.651	703.651	-1.95459	81.168	165.251	406.823	147.833	4	211.994
8880	4	10	703.582	703.582	-1.95439	81.168	165.252	407.167	148	4	212.189
8890	4	10	703.513	703.513	-1.9542	81.168	165.252	407.512	148.167	4	212.385
8900	4	10	703.443	703.443	-1.95401	81.168	165.252	407.856	148.333	4	212.58
8910	4	10	703.374	703.374	-1.95382	81.168	165.253	408.2	148.5	4	212.776
8920	4	10	703.305	703.305	-1.95363	81.168	165.253	408.543	148.667	4	212.971
8930	4	10	703.236	703.236	-1.95343	81.168	165.253	408.887	148.833	4	213.166
8940	4	10	703.167	703.167	-1.95324	81.168	165.254	409.23	149	4	213.362
8950	4	10	703.098	703.098	-1.95305	81.168	165.254	409.573	149.167	4	213.557
8960	4	10	703.029	703.029	-1.95286	81.168	165.254	409.916	149.333	4	213.752
8970	4	10	702.96	702.96	-1.95267	81.168	165.255	410.259	149.5	4	213.948
8980	4	10	702.892	702.892	-1.95248	81.168	165.255	410.601	149.667	4	214.143
8990	4	10	702.823	702.823	-1.95229	81.168	165.255	410.944	149.833	4	214.338
9000	4	10	702.754	702.754	-1.95209	81.168	165.255	411.286	150	4	214.533
9010	4	10	702.685	702.685	-1.9519	81.168	165.256	411.628	150.167	4	214.728
9020	4	10	702.617	702.617	-1.95171	81.168	165.256	411.97	150.333	4	214.924
9030	4	10	702.548	702.548	-1.95152	81.168	165.256	412.311	150.5	4	215.119
9040	4	10	702.48	702.48	-1.95133	81.168	165.257	412.653	150.667	4	215.314
9050	4	10	702.411	702.411	-1.95114	81.168	165.257	412.994	150.833	4	215.509
9060	4	10	702.343	702.343	-1.95095	81.168	165.257	413.335	151	4	215.704
9070	4	10	702.274	702.274	-1.95076	81.168	165.257	413.676	151.167	4	215.899
9080	4	10	702.206	702.206	-1.95057	81.168	165.258	414.016	151.333	4	216.094
9090	4	10	702.138	702.138	-1.95038	81.168	165.258	414.357	151.5	4	216.289
9100	4	10	702.069	702.069	-1.95019	81.168	165.258	414.697	151.667	4	216.484
9110	4	10	702.001	702.001	-1.95	81.168	165.259	415.037	151.833	4	216.679
9120	4	10	701.933	701.933	-1.94981	81.168	165.259	415.377	152	4	216.874
9130	4	10	701.865	701.865	-1.94962	81.168	165.259	415.717	152.167	4	217.069
9140	4	10	701.797	701.797	-1.94944	81.168	165.259	416.056	152.333	4	217.264
9150	4	10	701.729	701.729	-1.94925	81.168	165.26	416.396	152.5	4	217.459
9160	4	10	701.661	701.661	-1.94906	81.168	165.26	416.735	152.667	4	217.654
9170	4	10	701.593	701.593	-1.94887	81.168	165.26	417.074	152.833	4	217.849
9180	4	10	701.525	701.525	-1.94868	81.168	165.26	417.413	153	4	218.044
9190	4	10	701.457	701.457	-1.94849	81.168	165.261	417.751	153.167	4	218.239
9200	4	10	701.389	701.389	-1.9483	81.168	165.261	418.09	153.333	4	218.433
9210	4	10	701.321	701.321	-1.94812	81.168	165.261	418.428	153.5	4	218.628
9220	4	10	701.254	701.254	-1.94793	81.168	165.261	418.766	153.667	4	218.823
9230	4	10	701.186	701.186	-1.94774	81.168	165.262	419.104	153.833	4	219.018
9240	4	10	701.118	701.118	-1.94755	81.168	165.262	419.441	154	4	219.213
9250	4	10	701.051	701.051	-1.94736	81.168	165.262	419.779	154.167	4	219.407
9260	4	10	700.983	700.983	-1.94718	81.168	165.262	420.116	154.333	4	219.602
9270	4	10	700.916	700.916	-1.94699	81.168	165.263	420.453	154.5	4	219.797
9280	4	10	700.848	700.848	-1.9468	81.168	165.263	420.79	154.667	4	219.991
9290	4	10	700.781	700.781	-1.94661	81.168	165.263	421.127	154.833	4	220.186
9300	4	10	700.713	700.713	-1.94643	81.168	165.263	421.463	155	4	220.381
9310	4	10	700.646	700.646	-1.94624	81.168	165.263	421.8	155.167	4	220.575
9320	4	10	700.579	700.579	-1.94605	81.168	165.264	422.136	155.333	4	220.77
9330	4	10	700.512	700.512	-1.94587	81.168	165.264	422.472	155.5	4	220.965
9340	4	10	700.444	700.444	-1.94568	81.168	165.264	422.808	155.667	4	221.159
9350	4	10	700.377	700.377	-1.94549	81.168	165.264	423.143	155.833	4	221.354
9360	4	10	700.31	700.31	-1.94531	81.168	165.265	423.479	156	4	221.548
9370	4	10	700.243	700.243	-1.94512	81.168	165.265	423.814	156.167	4	221.743
9380	4	10	700.176	700.176	-1.94493	81.168	165.265	424.149	156.333	4	221.937
9390	4	10	700.109	700.109	-1.94475	81.168	165.265	424.484	156.5	4	222.132
9400	4	10	700.042	700.042	-1.94456	81.168	165.265	424.819	156.667	4	222.326
9410	4	10	699.975	699.975	-1.94438	81.168	165.266	425.153	156.833	4	222.521
9420	4	10	699.908	699.908	-1.94419	81.168	165.266	425.488	157	4	222.715
9430	4	10	699.841	699.841	-1.944	81.168	165.266	425.822	157.167	4	222.909
9440	4	10	699.775	699.775	-1.94382	81.168	165.266	426.156	157.333	4	223.104
9450	4	10	699.708	699.708	-1.94363	81.168	165.266	426.49	157.5	4	223.298
9460	4	10	699.641	699.641	-1.94345	81.168	165.267	426.823	157.667	4	223.492
9470	4	10	699.575	699.575	-1.94326	81.168	165.267	427.157	157.833	4	223.687
9480	4	10	699.508	699.508	-1.94308	81.168	165.267	427.49	158	4	223.881
9490	4	10	699.441	699.441	-1.94289	81.168	165.267	427.823	158.167	4	224.075
9500	4	10	699.375	699.375	-1.94271	81.168	165.267	428.156	158.333	4	224.27
9510	4	10	699.308	699.308	-1.94252	81.168	165.268	428.489	158.5	4	224.464
9520	4	10	699.242	699.242	-1.94234	81.168	165.268	428.821	158.667	4	224.658
9530	4	10	699.175	699.175	-1.94215	81.168	165.268	429.153	158.833	4	224.852
9540	4	10	699.109	699.109	-1.94197	81.168	165.268	429.486	159	4	225.047
9550	4	10	699.043	699.043	-1.94179	81.168	165.268	429.817	159.167	4	225.241
9560	4	10	698.977	698.977	-1.9416	81.168	165.268	430.149	159.333	4	225.435
9570	4	10	698.91	698.91	-1.94142	81.168	165.269	430.481	159.5	4	225.629
9580	4	10	698.844	698.844	-1.94123	81.168	165.269	430.812	159.667	4	225.823
9590	4	10	698.778	698.778	-1.94105	81.168	165.269	431.144	159.833	4	226.017
9600	4	10	698.712	698.712	-1.94087	81.168	165.269	431.475	160	4	226.211
9610	4	10	698.646	698.646	-1.94068	81.168	165.269	431.805	160.167	4	226.405
9620	4	10	698.58	698.58	-1.9405	81.168	165.269	432.136	160.333	4	226.599
9630	4	10	698.514	698.514	-1.94032	81.168	165.27	432.467	160.5	4	226.794
9640	4	10	698.448	698.448	-1.94013	81.168	165.27	432.797	160.667	4	226.988
9650	4	10	698.382	698.382	-1.93995	81.168	165.27	433.127	160.833	4	227.182
9660	4	10	698.316	698.316	-1.93977	81.168	165.27	433.457	161	4	227.375
9670	4	10	698.25	698.25	-1.93958	81.168	165.27	433.787	161.167	4	227.569
9680	4	10	698.184	698.184	-1.9394	81.168	165.27	434.116	161.333	4	227.763
9690	4	10	698.119	698.119	-1.93922	81.168	165.271	434.446	161.5	4	227.957
9700	4	10	698.053	698.053	-1.93904	81.168	165.271	434.775	161.667	4	228.151
9710	4	10	697.987	697.987	-1.93885	81.168	165.271	435.104	161.833	4	228.345
9720	4	10	697.922	697.922	-1.93867	81.168	165.271	435.433	162	4	228.539
9730	4	10	697.856	697.856	-1.93849	81.168	165.271	435.762	162.167	4	228.733
9740	4	10	697.791	697.791	-1.93831	81.168	165.271	436.09	162.333	4	228.927
9750	4	10	697.725	697.725	-1.93813	81.168	165.271	436.418	162.5	4	229.12
9760	4	10	697.66	697.66	-1.93794	81.168	165.272	436.747	162.667	4	229.314
9770	4	10	697.594	697.594	-1.93776	81.168	165.272	437.075	162.833	4	229.508
9780	4	10	697.529	697.529	-1.93758	81.168	165.272	437.402	163	4	229.702
9790	4	10	697.463	697.463	-1.9374	81.168	165.272	437.73	163.167	4	229.896
9800	4	10	697.398	697.398	-1.93722	81.168	165.272	438.057	163.333	4	230.089
9810	4	10	697.333	697.333	-1.93704	81.168	165.272	438.385	163.5	4	230.283
9820	4	10	697.268	697.268	-1.93685	81.168	165.272	438.712	163.667	4	230.477
9830	4	10	697.203	697.203	-1.93667	81.168	165.273	439.039	163.833	4	230.67
9840	4	10	697.137	697.137	-1.93649	81.168	165.273	439.365	164	4	230.864
9850	4	10	697.072	697.072	-1.93631	81.168	165.273	439.692	164.167	4	231.058
9860	4	10	697.007	697.007	-1.93613	81.168	165.273	440.018	164.333	4	231.251
9870	4	10	696.942	696.942	-1.93595	81.168	165.273	440.344	164.5	4	231.445
9880	4	10	696.877	696.877	-1.93577	81.168	165.273	440.67	164.667	4	231.638
9890	4	10	696.812	696.812	-1.93559	81.168	165.273	440.996	164.833	4	231.832
9900	4	10	696.747	696.747	-1.93541	81.168	165.274	441.322	165	4	232.025
9910	4	10	696.683	696.683	-1.93523	81.168	165.274	441.647	165.167	4	232.219
9920	4	10	696.618	696.618	-1.93505	81.168	165.274	441.972	165.333	4	232.413
9930	4	10	696.553	696.553	-1.93487	81.168	165.274	442.298	165.5	4	232.606
9940	4	10	696.488	696.488	-1.93469	81.168	165.274	442.622	165.667	4	232.799
9950	4	10	696.423	696.423	-1.93451	81.168	165.274	442.947	165.833	4	232.993
9960	4	10	696.359	696.359	-1.93433	81.168	165.274	443.272	166	4	233.186
9970	4	10	696.294	696.294	-1.93415	81.168	165.274	443.596	166.167	4	233.38
9980	4	10	696.23	696.23	-1.93397	81.168	165.275	443.92	166.333	4	233.573
9990	4	10	696.165	696.165	-1.93379	81.168	165.275	444.244	166.5	4	233.767
10000	4	10	696.101	696.101	-1.93361	81.168	165.275	444.568	166.667	4	233.96
10010	4	10	696.036	696.036	-1.93343	81.168	165.275	444.892	166.833	4	234.153
10020	4	10	695.972	695.972	-1.93325	81.168	165.275	445.215	167	4	234.347
10030	4	10	695.907	695.907	-1.93308	81.168	165.275	445.539	167.167	4	234.54
10040	4	10	695.843	695.843	-1.9329	81.168	165.275	445.862	167.333	4	234.733
10050	4	10	695.779	695.779	-1.93272	81.168	165.275	446.185	167.5	4	234.926
10060	4	10	695.714	695.714	-1.93254	81.168	165.275	446.508	167.667	4	235.12
10070	4	10	695.65	695.65	-1.93236	81.168	165.276	446.83	167.833	4	235.313
10080	4	10	695.586	695.586	-1.93218	81.168	165.276	447.153	168	4	235.506
10090	4	10	695.522	695.522	-1.932	81.168	165.276	447.475	168.167	4	235.699
10100	4	10	695.458	695.458	-1.93183	81.168	165.276	447.797	168.333	4	235.893
10110	4	10	695.393	695.393	-1.93165	81.168	165.276	448.119	168.5	4	236.086
10120	4	10	695.329	695.329	-1.93147	81.168	165.276	448.44	168.667	4	236.279
10130	4	10	695.265	695.265	-1.93129	81.168	165.276	448.762	168.833	4	236.472
10140	4	10	695.201	695.201	-1.93112	81.168	165.276	449.083	169	4	236.665
10150	4	10	695.137	695.137	-1.93094	81.168	165.276	449.405	169.167	4	236.858
10160	4	10	695.074	695.074	-1.93076	81.168	165.277	449.726	169.333	4	237.051
10170	4	10	695.01	695.01	-1.93058	81.168	165.277	450.046	169.5	4	237.244
10180	4	10	694.946	694.946	-1.93041	81.168	165.277	450.367	169.667	4	237.437
10190	4	10	694.882	694.882	-1.93023	81.168	165.277	450.687	169.833	4	237.63
10200	4	10	694.818	694.818	-1.93005	81.168	165.277	451.008	170	4	237.823
10210	4	10	694.755	694.755	-1.92987	81.168	165.277	451.328	170.167	4	238.016
10220	4	10	694.691	694.691	-1.9297	81.168	165.277	451.648	170.333	4	238.209
10230	4	10	694.627	694.627	-1.92952	81.168	165.277	451.968	170.5	4	238.402
10240	4	10	694.564	694.564	-1.92934	81.168	165.277	452.287	170.667	4	238.595
10250	4	10	694.5	694.5	-1.92917	81.168	165.277	452.607	170.833	4	238.788
10260	4	10	694.437	694.437	-1.92899	81.168	165.278	452.926	171	4	238.981
10270	4	10	694.373	694.373	-1.92881	81.168	165.278	453.245	171.167	4	239.174
10280	4	10	694.31	694.31	-1.92864	81.168	165.278	453.564	171.333	4	239.367
10290	4	10	694.246	694.246	-1.92846	81.168	165.278	453.883	171.5	4	239.56
10300	4	10	694.183	694.183	-1.92829	81.168	165.278	454.201	171.667	4	239.752
10310	4	10	694.12	694.12	-1.92811	81.168	165.278	454.519	171.833	4	239.945
10320	4	10	694.056	694.056	-1.92793	81.168	165.278	454.838	172	4	240.138
10330	4	10	693.993	693.993	-1.92776	81.168	165.278	455.156	172.167	4	240.331
10340	4	10	693.93	693.93	-1.92758	81.168	165.278	455.473	172.333	4	240.524
10350	4	10	693.867	693.867	-1.92741	81.168	165.278	455.791	172.5	4	240.716
10360	4	10	693.804	693.804	-1.92723	81.168	165.278	456.109	172.667	4	240.909
10370	4	10	693.741	693.741	-1.92706	81.168	165.278	456.426	172.833	4	241.102
10380	4	10	693.677	693.677	-1.92688	81.168	165.279	456.743	173	4	241.294
10390	4	10	693.614	693.614	-1.92671	81.168	165.279	457.06	173.167	4	241.487
10400	4	10	693.551	693.551	-1.92653	81.168	165.279	457.377	173.333	4	241.68
10410	4	10	693.488	693.488	-1.92636	81.168	165.279	457.693	173.5	4	241.872
10420	4	10	693.426	693.426	-1.92618	81.168	165.279	458.01	173.667	4	242.065
10430	4	10	693.363	693.363	-1.92601	81.168	165.279	458.326	173.833	4	242.258
10440	4	10	693.3	693.3	-1.92583	81.168	165.279	458.642	174	4	242.45
10450	4	10	693.237	693.237	-1.92566	81.168	165.279	458.958	174.167	4	242.643
10460	4	10	693.174	693.174	-1.92548	81.168	165.279	459.274	174.333	4	242.835
10470	4	10	693.111	693.111	-1.92531	81.168	165.279	459.59	174.5	4	243.028
10480	4	10	693.049	693.049	-1.92514	81.168	165.279	459.905	174.667	4	243.22
10490	4	10	692.986	692.986	-1.92496	81.168	165.279	460.22	174.833	4	243.413
10500	4	10	692.923	692.923	-1.92479	81.168	165.28	460.535	175	4	243.605
10510	4	10	692.861	692.861	-1.92461	81.168	165.28	460.85	175.167	4	243.798
10520	4	10	692.798	692.798	-1.92444	81.168	165.28	461.165	175.333	4	243.99
10530	4	10	692.736	692.736	-1.92427	81.168	165.28	461.479	175.5	4	244.183
10540	4	10	692.673	692.673	-1.92409	81.168	165.28	461.794	175.667	4	244.375
10550	4	10	692.611	692.611	-1.92392	81.168	165.28	462.108	175.833	4	244.567
10560	4	10	692.549	692.549	-1.92375	81.168	165.28	462.422	176	4	244.76
10570	4	10	692.486	692.486	-1.92357	81.168	165.28	462.736	176.167	4	244.952
10580	4	10	692.424	692.424	-1.9234	81.168	165.28	463.049	176.333	4	245.145
10590	4	10	692.361	692.361	-1.92323	81.168	165.28	463.363	176.5	4	245.337
10600	4	10	692.299	692.299	-1.92305	81.168	165.28	463.676	176.667	4	245.529
10610	4	10	692.237	692.237	-1.92288	81.168	165.28	463.989	176.833	4	245.721
10620	4	10	692.175	692.175	-1.92271	81.168	165.28	464.302	177	4	245.914
10630	4	10	692.113	692.113	-1.92254	81.168	165.28	464.615	177.167	4	246.106
10640	4	10	692.051	692.051	-1.92236	81.168	165.28	464.928	177.333	4	246.298
10650	4	10	691.988	691.988	-1.92219	81.168	165.281	465.24	177.5	4	246.49
10660	4	10	691.926	691.926	-1.92202	81.168	165.281	465.553	177.667	4	246.683
10670	4	10	691.864	691.864	-1.92185	81.168	165.281	465.865	177.833	4	246.875
10680	4	10	691.802	691.802	-1.92167	81.168	165.281	466.177	178	4	247.067
10690	4	10	691.74	691.74	-1.9215	81.168	165.281	466.488	178.167	4	247.259
10700	4	10	691.679	691.679	-1.92133	81.168	165.281	466.8	178.333	4	247.451
10710	4	10	691.617	691.617	-1.92116	81.168	165.281	467.111	178.5	4	247.643
10720	4	10	691.555	691.555	-1.92099	81.168	165.281	467.423	178.667	4	247.836
10730	4	10	691.493	691.493	-1.92081	81.168	165.281	467.734	178.833	4	248.028
10740	4	10	691.431	691.431	-1.92064	81.168	165.281	468.045	179	4	248.22
10750	4	10	691.37	691.37	-1.92047	81.168	165.281	468.356	179.167	4	248.412
10760	4	10	691.308	691.308	-1.9203	81.168	165.281	468.666	179.333	4	248.604
10770	4	10	691.246	691.246	-1.92013	81.168	165.281	468.977	179.5	4	248.796
10780	4	10	691.185	691.185	-1.91996	81.168	165.281	469.287	179.667	4	248.988
10790	4	10	691.123	691.123	-1.91979	81.168	165.281	469.597	179.833	4	249.18
10800	4	10	691.062	691.062	-1.91962	81.168	165.281	469.907	180	4	249.372
10810	0	10	-28529.5	0	-1.91944	79.2486	165.282	470.216	180.167	3.90541	249.372
10820	5	10	8655.74	8655.74	-1.83227	101.46	165.246	470.513	180.333	5	251.776
10830	5	10	1022.1	1022.1	-2.83917	101.46	165.625	470.964	180.5	5	252.06
10840	5	10	1020.77	1020.77	-2.83548	101.46	166.001	471.415	180.667	5	252.344
10850	0	10	-35506.1	0	-2.83182	98.6282	166.373	471.866	180.833	4.86045	252.344
10860	0	10	-34534.2	0	-2.69984	95.9283	166.689	472.297	181	4.7274	252.344
10870	0	10	-33607.4	0	-2.57436	93.354	166.951	472.709	181.167	4.60053	252.344
10880	0	10	-32723.6	0	-2.45507	90.8989	167.164	473.102	181.333	4.47954	252.344
10890	0	10	-31880.6	0	-2.34165	88.5573	167.328	473.478	181.5	4.36415	252.344
10900	0	10	-31076.4	0	-2.23381	86.3235	167.447	473.838	181.667	4.25406	252.344
10910	0	10	-30309.2	0	-2.13128	84.1922	167.524	474.181	181.833	4.14903	252.344
10920	0	10	-29577	0	-2.0338	82.1584	167.56	474.51	182	4.04881	252.344
10930	0	10	-28878.2	0	-1.94111	80.2173	167.557	474.824	182.167	3.95315	252.344
10940	0	10	-28211.1	0	-1.85298	78.3643	167.519	475.124	182.333	3.86183	252.344
10950	0	10	-27574.2	0	-1.76918	76.5951	167.446	475.412	182.5	3.77465	252.344
10960	0	10	-26966	0	-1.68949	74.9056	167.341	475.686	182.667	3.69139	252.344
10970	0	10	-26385.1	0	-1.61372	73.2919	167.205	475.949	182.833	3.61186	252.344
10980	0	10	-25830.1	0	-1.54167	71.7502	167.041	476.2	183	3.53589	252.344
10990	0	10	-25299.8	0	-1.47315	70.2771	166.849	476.441	183.167	3.46329	252.344
11000	0	10	-24792.9	0	-1.40799	68.8691	166.631	476.671	183.333	3.3939	252.344
11010	0	10	-24308.3	0	-1.34602	67.5231	166.389	476.891	183.5	3.32757	252.344
11020	0	10	-23845	0	-1.28709	66.236	166.124	477.101	183.667	3.26414	252.344
11030	0	10	-23401.8	0	-1.23104	65.005	165.838	477.302	183.833	3.20348	252.344
11040	0	10	-22977.8	0	-1.17773	63.8272	165.531	477.495	184	3.14544	252.344
11050	0	10	-22572.1	0	-1.12703	62.7002	165.205	477.679	184.167	3.0899	252.344
11060	0	10	-22183.7	0	-1.07881	61.6214	164.861	477.855	184.333	3.03673	252.344
11070	0	10	-21811.8	0	-1.03294	60.5884	164.5	478.024	184.5	2.98583	252.344
11080	0	10	-21455.7	0	-0.989307	59.5991	164.123	478.185	184.667	2.93708	252.344
11090	0	10	-21114.5	0	-0.947802	58.6513	163.732	478.339	184.833	2.89037	252.344
11100	0	10	-20787.5	0	-0.908318	57.743	163.325	478.486	185	2.8456	252.344
11110	0	10	-20474	0	-0.870755	56.8723	162.906	478.627	185.167	2.80269	252.344
11120	0	10	-20173.4	0	-0.835019	56.0372	162.475	478.762	185.333	2.76154	252.344
11130	0	10	-19885	0	-0.801018	55.2362	162.031	478.891	185.5	2.72207	252.344
11140	0	10	-19608.3	0	-0.768668	54.4676	161.577	479.015	185.667	2.68419	252.344
11150	0	10	-19342.7	0	-0.737886	53.7297	161.113	479.132	185.833	2.64783	252.344
11160	0	10	-19087.6	0	-0.708594	53.0211	160.639	479.245	186	2.61291	252.344
11170	0	10	-18842.5	0	-0.680719	52.3404	160.156	479.352	186.167	2.57936	252.344
11180	0	10	-18607	0	-0.654192	51.6862	159.665	479.455	186.333	2.54712	252.344
11190	0	10	-18380.6	0	-0.628944	51.0572	159.166	479.553	186.5	2.51613	252.344
11200	0	10	-18162.8	0	-0.604914	50.4523	158.66	479.647	186.667	2.48632	252.344
11210	0	10	-17953.3	0	-0.58204	49.8703	158.147	479.736	186.833	2.45763	252.344
11220	0	10	-17751.6	0	-0.560266	49.31	157.629	479.822	187	2.43002	252.344
11230	0	10	-17557.4	0	-0.539537	48.7705	157.104	479.903	187.167	2.40343	252.344
11240	0	10	-17370.2	0	-0.519801	48.2507	156.574	479.98	187.333	2.37782	252.344
11250	0	10	-17189.9	0	-0.50101	47.7497	156.04	480.054	187.5	2.35313	252.344
11260	0	10	-17016	0	-0.483116	47.2665	155.501	480.124	187.667	2.32932	252.344
11270	0	10	-16848.2	0	-0.466077	46.8005	154.958	480.191	187.833	2.30635	252.344
11280	0	10	-16686.2	0	-0.449848	46.3506	154.411	480.255	188	2.28418	252.344
11290	0	10	-16529.8	0	-0.43439	45.9162	153.861	480.315	188.167	2.26277	252.344
11300	0	10	-16378.8	0	-0.419666	45.4966	153.307	480.372	188.333	2.24209	252.344
11310	0	20	-8041.53	0	-0.821411	44.6751	152.195	480.481	188.5	2.20161	252.344
11330	0	20	-7903.44	0	-0.767133	43.908	151.073	480.578	188.833	2.16381	252.344
11350	0	20	-7774.21	0	-0.717954	43.1901	149.942	480.664	189.167	2.12843	252.344
11370	0	20	-7653	0	-0.673373	42.5167	148.806	480.74	189.5	2.09524	252.344
11390	0	20	-7539.07	0	-0.632938	41.8837	147.665	480.806	189.833	2.06405	252.344
11410	0	20	-7431.75	0	-0.596242	41.2875	146.522	480.864	190.167	2.03467	252.344
11430	0	20	-7330.43	0	-0.562918	40.7246	145.377	480.913	190.5	2.00693	252.344
11450	0	20	-7234.55	0	-0.532637	40.192	144.232	480.954	190.833	1.98068	252.344
11470	0	20	-7143.63	0	-0.505098	39.6869	143.088	480.987	191.167	1.95579	252.344
11490	0	20	-7057.23	0	-0.480035	39.2068	141.947	481.014	191.5	1.93213	252.344
11510	0	20	-6974.93	0	-0.457205	38.7496	140.808	481.034	191.833	1.9096	252.344
11530	0	20	-6896.38	0	-0.43639	38.3132	139.673	481.047	192.167	1.88809	252.344
11550	0	20	-6821.25	0	-0.417393	37.8958	138.543	481.054	192.5	1.86753	252.344
11570	0	20	-6749.24	0	-0.400037	37.4958	137.418	481.056	192.833	1.84781	252.344
11590	0	20	-6680.09	0	-0.384162	37.1116	136.298	481.051	193.167	1.82888	252.344
11610	0	20	-6613.56	0	-0.369624	36.742	135.185	481.042	193.5	1.81066	252.344
11630	0	20	-6549.43	0	-0.356294	36.3857	134.078	481.027	193.833	1.79311	252.344
11650	0	20	-6487.5	0	-0.344054	36.0417	132.978	481.007	194.167	1.77615	252.344
11670	0	20	-6427.59	0	-0.332799	35.7089	131.886	480.983	194.5	1.75975	252.344
11690	0	20	-6369.56	0	-0.322434	35.3864	130.801	480.954	194.833	1.74386	252.344
11710	0	20	-6313.24	0	-0.312873	35.0736	129.724	480.92	195.167	1.72844	252.344
11730	0	20	-6258.51	0	-0.30404	34.7695	128.655	480.882	195.5	1.71346	252.344
11750	0	20	-6205.26	0	-0.295863	34.4736	127.595	480.84	195.833	1.69888	252.344
11770	0	20	-6153.37	0	-0.288281	34.1854	126.543	480.794	196.167	1.68467	252.344
11790	0	20	-6102.74	0	-0.281237	33.9041	125.499	480.743	196.5	1.67081	252.344
11810	0	20	-6053.3	0	-0.27468	33.6295	124.464	480.689	196.833	1.65728	252.344
11830	0	20	-6004.96	0	-0.268564	33.3609	123.438	480.631	197.167	1.64404	252.344
11850	0	20	-5957.65	0	-0.262848	33.098	122.42	480.57	197.5	1.63109	252.344
11870	0	20	-5911.3	0	-0.257493	32.8405	121.411	480.504	197.833	1.6184	252.344
11890	0	20	-5865.85	0	-0.252467	32.5881	120.411	480.435	198.167	1.60596	252.344
11910	0	20	-5821.26	0	-0.247739	32.3403	119.421	480.363	198.5	1.59375	252.344
11930	0	20	-5777.47	0	-0.243282	32.0971	118.439	480.288	198.833	1.58176	252.344
11950	0	20	-5734.44	0	-0.23907	31.858	117.465	480.209	199.167	1.56998	252.344
11970	0	20	-5692.12	0	-0.235081	31.6229	116.501	480.126	199.5	1.55839	252.344
11990	0	20	-5650.49	0	-0.231296	31.3916	115.546	480.041	199.833	1.54699	252.344
12010	0	20	-5609.5	0	-0.227696	31.1639	114.6	479.952	200.167	1.53577	252.344
12030	0	20	-5569.14	0	-0.224265	30.9396	113.662	479.861	200.5	1.52472	252.344
12050	0	20	-5529.36	0	-0.220987	30.7187	112.733	479.766	200.833	1.51383	252.344
12070	0	20	-5490.15	0	-0.217851	30.5008	111.813	479.668	201.167	1.5031	252.344
12090	0	20	-5451.47	0	-0.214843	30.286	110.902	479.568	201.5	1.49251	252.344
12110	0	20	-5413.32	0	-0.211952	30.074	110	479.464	201.833	1.48206	252.344
12130	0	20	-5375.67	0	-0.20917	29.8648	109.106	479.358	202.167	1.47175	252.344
12150	0	20	-5338.5	0	-0.206486	29.6584	108.22	479.249	202.5	1.46158	252.344
12170	0	20	-5301.8	0	-0.203894	29.4545	107.344	479.137	202.833	1.45153	252.344
12190	0	20	-5265.55	0	-0.201385	29.2531	106.475	479.022	203.167	1.44161	252.344
12210	0	20	-5229.74	0	-0.198953	29.0541	105.615	478.905	203.5	1.4318	252.344
12230	0	20	-5194.36	0	-0.196593	28.8575	104.764	478.785	203.833	1.42211	252.344
12250	0	20	-5159.38	0	-0.194299	28.6632	103.92	478.662	204.167	1.41254	252.344
12270	0	20	-5124.81	0	-0.192066	28.4712	103.085	478.537	204.5	1.40307	252.344
12290	0	20	-5090.63	0	-0.18989	28.2813	102.258	478.409	204.833	1.39372	252.344
12310	0	20	-5056.83	0	-0.187766	28.0935	101.439	478.279	205.167	1.38446	252.344
12330	0	20	-5023.41	0	-0.185692	27.9078	100.629	478.146	205.5	1.37531	252.344
12350	0	20	-4990.35	0	-0.183664	27.7242	99.8256	478.011	205.833	1.36626	252.344
12370	0	20	-4957.65	0	-0.181679	27.5425	99.0305	477.873	206.167	1.35731	252.344
12390	0	20	-4925.29	0	-0.179734	27.3627	98.2432	477.733	206.5	1.34845	252.344
12410	0	20	-4893.29	0	-0.177827	27.1849	97.4636	477.59	206.833	1.33969	252.344
12430	0	20	-4861.61	0	-0.175956	27.009	96.6917	477.446	207.167	1.33102	252.344
12450	0	20	-4830.27	0	-0.174119	26.8348	95.9273	477.299	207.5	1.32243	252.344
12470	0	20	-4799.26	0	-0.172314	26.6625	95.1705	477.149	207.833	1.31394	252.344
12490	0	20	-4768.56	0	-0.170539	26.492	94.4211	476.998	208.167	1.30554	252.344
12510	0	20	-4738.18	0	-0.168793	26.3232	93.6791	476.844	208.5	1.29722	252.344
12530	0	20	-4708.1	0	-0.167074	26.1561	92.9444	476.688	208.833	1.28899	252.344
12550	0	20	-4678.33	0	-0.165381	25.9907	92.2169	476.53	209.167	1.28084	252.344
12570	0	20	-4648.86	0	-0.163714	25.827	91.4966	476.369	209.5	1.27277	252.344
12590	0	20	-4619.69	0	-0.162071	25.665	90.7833	476.207	209.833	1.26478	252.344
12610	0	20	-4590.81	0	-0.16045	25.5045	90.0771	476.042	210.167	1.25687	252.344
12630	0	20	-4562.22	0	-0.158852	25.3457	89.3779	475.876	210.5	1.24905	252.344
12650	0	20	-4533.91	0	-0.157275	25.1884	88.6855	475.707	210.833	1.2413	252.344
12670	0	20	-4505.88	0	-0.155719	25.0327	88	475.537	211.167	1.23362	252.344
12690	0	20	-4478.13	0	-0.154183	24.8785	87.3212	475.364	211.5	1.22602	252.344
12710	0	20	-4450.65	0	-0.152666	24.7258	86.6491	475.189	211.833	1.2185	252.344
12730	0	20	-4423.44	0	-0.151168	24.5746	85.9837	475.013	212.167	1.21105	252.344
12750	0	20	-4396.49	0	-0.149688	24.425	85.3247	474.834	212.5	1.20367	252.344
12770	0	20	-4369.81	0	-0.148226	24.2767	84.6723	474.654	212.833	1.19637	252.344
12790	0	20	-4343.39	0	-0.146781	24.1299	84.0263	474.472	213.167	1.18914	252.344
12810	0	20	-4317.23	0	-0.145353	23.9846	83.3867	474.288	213.5	1.18197	252.344
12830	0	20	-4291.32	0	-0.143941	23.8407	82.7534	474.102	213.833	1.17488	252.344
12850	0	20	-4265.66	0	-0.142546	23.6981	82.1263	473.914	214.167	1.16785	252.344
12870	0	20	-4240.25	0	-0.141166	23.5569	81.5054	473.724	214.5	1.1609	252.344
12890	0	20	-4215.09	0	-0.139802	23.4171	80.8905	473.533	214.833	1.15401	252.344
12910	0	20	-4190.16	0	-0.138453	23.2787	80.2818	473.34	215.167	1.14719	252.344
12930	0	20	-4165.48	0	-0.137119	23.1416	79.679	473.145	215.5	1.14043	252.344
12950	0	20	-4141.04	0	-0.135799	23.0058	79.0822	472.949	215.833	1.13374	252.344
12970	0	20	-4116.83	0	-0.134493	22.8713	78.4912	472.751	216.167	1.12711	252.344
12990	0	20	-4092.85	0	-0.133202	22.7381	77.9061	472.551	216.5	1.12054	252.344
13010	0	20	-4069.11	0	-0.131924	22.6062	77.3267	472.349	216.833	1.11404	252.344
13030	0	20	-4045.59	0	-0.13066	22.4755	76.753	472.146	217.167	1.1076	252.344
13050	0	20	-4022.29	0	-0.12941	22.3461	76.185	471.942	217.5	1.10123	252.344
13070	0	20	-3999.22	0	-0.128172	22.2179	75.6225	471.735	217.833	1.09491	252.344
13090	0	20	-3976.37	0	-0.126948	22.091	75.0655	471.527	218.167	1.08865	252.344
13110	0	20	-3953.74	0	-0.125736	21.9652	74.5141	471.318	218.5	1.08246	252.344
13130	0	20	-3931.32	0	-0.124537	21.8407	73.968	471.107	218.833	1.07632	252.344
13150	0	20	-3909.12	0	-0.123351	21.7173	73.4273	470.895	219.167	1.07024	252.344
13170	0	20	-3887.13	0	-0.122177	21.5952	72.8919	470.681	219.5	1.06422	252.344
13190	0	20	-3865.35	0	-0.121015	21.4741	72.3618	470.465	219.833	1.05826	252.344
13210	0	20	-3843.77	0	-0.119865	21.3543	71.8369	470.248	220.167	1.05235	252.344
13230	0	20	-3822.4	0	-0.118726	21.2356	71.3171	470.03	220.5	1.0465	252.344
13250	0	20	-3801.23	0	-0.1176	21.118	70.8024	469.81	220.833	1.0407	252.344
13270	0	20	-3780.26	0	-0.116485	21.0015	70.2928	469.589	221.167	1.03496	252.344
13290	0	20	-3759.5	0	-0.115382	20.8861	69.7881	469.367	221.5	1.02928	252.344
13310	0	20	-3738.92	0	-0.114289	20.7718	69.2884	469.143	221.833	1.02364	252.344
13330	0	20	-3718.55	0	-0.113208	20.6586	68.7936	468.918	222.167	1.01807	252.344
13350	0	20	-3698.36	0	-0.112138	20.5465	68.3036	468.691	222.5	1.01254	252.344
13370	0	20	-3678.37	0	-0.111079	20.4354	67.8185	468.463	222.833	1.00707	252.344
13390	0	20	-3658.56	0	-0.110031	20.3253	67.3381	468.234	223.167	1.00164	252.344
13410	0	20	-3638.94	0	-0.108993	20.2163	66.8623	468.003	223.5	0.996272	252.344
13430	0	20	-3619.51	0	-0.107966	20.1084	66.3913	467.772	223.833	0.990951	252.344
13450	0	20	-3600.26	0	-0.106949	20.0014	65.9248	467.538	224.167	0.985681	252.344
13470	0	20	-3581.19	0	-0.105942	19.8955	65.4629	467.304	224.5	0.98046	252.344
13490	0	20	-3562.3	0	-0.104946	19.7905	65.0055	467.069	224.833	0.975288	252.344
13510	0	20	-3543.59	0	-0.10396	19.6866	64.5526	466.832	225.167	0.970165	252.344
13530	0	20	-3525.05	0	-0.102984	19.5836	64.1041	466.594	225.5	0.96509	252.344
13550	0	20	-3506.69	0	-0.102018	19.4816	63.66	466.355	225.833	0.960062	252.344
13570	0	20	-3488.49	0	-0.101061	19.3805	63.2202	466.115	226.167	0.955082	252.344
13590	0	20	-3470.47	0	-0.100114	19.2804	62.7847	465.873	226.5	0.950148	252.344
13610	0	20	-3452.62	0	-0.0991767	19.1812	62.3535	465.631	226.833	0.945261	252.344
13630	0	20	-3434.94	0	-0.0982489	19.083	61.9264	465.387	227.167	0.940419	252.344
13650	0	20	-3417.42	0	-0.0973304	18.9857	61.5035	465.142	227.5	0.935623	252.344
13670	0	20	-3400.06	0	-0.0964211	18.8892	61.0848	464.897	227.833	0.930871	252.344
13690	0	20	-3382.87	0	-0.0955211	18.7937	60.6701	464.65	228.167	0.926164	252.344
13710	0	20	-3365.83	0	-0.0946301	18.6991	60.2594	464.402	228.5	0.9215	252.344
13730	0	20	-3348.96	0	-0.0937481	18.6053	59.8528	464.153	228.833	0.91688	252.344
13750	0	20	-3332.24	0	-0.092875	18.5125	59.4501	463.902	229.167	0.912303	252.344
13770	0	20	-3315.68	0	-0.0920107	18.4204	59.0513	463.651	229.5	0.907769	252.344
13790	0	20	-3299.27	0	-0.091155	18.3293	58.6564	463.399	229.833	0.903277	252.344
13810	0	20	-3283.02	0	-0.0903081	18.239	58.2653	463.146	230.167	0.898826	252.344
13830	0	20	-3266.91	0	-0.0894696	18.1495	57.878	462.892	230.5	0.894417	252.344
13850	0	20	-3250.96	0	-0.0886396	18.0609	57.4945	462.637	230.833	0.890049	252.344
13870	0	20	-3235.15	0	-0.0878179	17.9731	57.1147	462.381	231.167	0.885721	252.344
13890	0	20	-3219.49	0	-0.0870045	17.8861	56.7386	462.124	231.5	0.881434	252.344
13910	0	20	-3203.97	0	-0.0861993	17.7999	56.3661	461.866	231.833	0.877186	252.344
13930											252.344

## Sheet: Regime Tester
Effect TCI
Time(sec)	Sec	Pump inf(mg/hr)	A1 change	A1	A2	A3	Time(min)	Concentration	Concentration Effect	Cumulative Infused Volume
0	1	12000	0	0	0	0	0	0	0	0.333333
1	1	12000	0	3.33333	0	0	0.0166667	0.451333	0	0.666667
2	1	12000	-0.0447282	6.62194	0.0193035	0.00661166	0.0333333	0.89661	0.000940779	1
3	1	12000	-0.0888354	9.86644	0.0576312	0.0197458	0.05	1.33592	0.00280775	1.33333
4	1	12000	-0.13233	13.0674	0.114708	0.0393144	0.0666667	1.76933	0.00558654	1.66667
5	1	12000	-0.175221	16.2256	0.190261	0.0652307	0.0833333	2.19694	0.00926297	2
6	1	12000	-0.217516	19.3414	0.284023	0.0974092	0.1	2.61882	0.0138231	2.33333
7	1	12000	-0.259225	22.4155	0.39573	0.135766	0.116667	3.03506	0.019253	2.66667
8	1	12000	-0.300354	25.4485	0.525122	0.180217	0.133333	3.44572	0.0255393	3
9	1	12000	-0.340912	28.4409	0.671941	0.23068	0.15	3.85089	0.0326685	3.33333
10	1	12000	-0.380907	31.3933	0.835935	0.287076	0.166667	4.25065	0.0406274	3.66667
11	1	12000	-0.420347	34.3063	1.01685	0.349323	0.183333	4.64507	0.0494029	4
12	3	12000	-1.37644	42.9299	1.60964	0.553385	0.2	5.8127	0.0589823	5
15	5	12000	-2.86623	56.7303	2.84419	0.978937	0.25	7.68128	0.0949623	6.66667
20	5	12000	-3.78377	69.6132	4.47183	1.5412	0.333333	9.42562	0.174029	8.33333
25	5	12000	-4.63775	81.6421	6.4639	2.23101	0.416667	11.0543	0.270451	10
30	5	12000	-5.43257	92.8762	8.79375	3.03987	0.5	12.5754	0.382843	11.6667
35	5	12000	-6.17236	103.371	11.4366	3.95985	0.583333	13.9964	0.509917	13.3333		Targeting	1	(0 = plasma	1 = effect site)
40	5	12000	-6.86091	113.176	14.3694	4.98356	0.666667	15.3241	0.650475	15
45	5	12000	-7.5018	122.341	17.5706	6.10414	0.75	16.565	0.803407	16.6667		Time Step (sec)	10
50	5	12000	-8.09832	130.909	21.0203	7.3152	0.833333	17.7251	0.967677	18.3333
55	5	12000	-8.65356	138.923	24.6998	8.61079	0.916667	18.8101	1.14233	20		Total Bolus	340
60	5	12000	-9.17038	146.419	28.592	9.98536	1	19.8251	1.32646	21.6667
65	5	12000	-9.65144	153.434	32.6807	11.4338	1.08333	20.775	1.51926	23.3333
70	5	12000	-10.0992	160.002	36.951	12.9512	1.16667	21.6642	1.71995	25
75	5	12000	-10.516	166.152	41.3888	14.5332	1.25	22.497	1.92781	26.6667
80	5	4800	-10.9041	171.915	45.9814	16.1757	1.33333	23.2773	2.14219	27.3333
85	5	0	-11.2652	167.316	50.7165	17.8747	1.41667	22.6546	2.36246	27.3333
90	5	0	-10.9318	156.384	55.2935	19.5274	1.5	21.1744	2.57395	27.3333
95	5	0	-10.1751	146.209	59.5298	21.0711	1.58333	19.7967	2.76781	27.3333
100	5	0	-9.47088	136.738	63.4492	22.5134	1.66667	18.5144	2.94529	27.3333
105	5	0	-8.81553	127.923	67.0736	23.8611	1.75	17.3208	3.10755	27.3333
110	5	0	-8.20565	119.717	70.4236	25.121	1.83333	16.2097	3.25569	27.3333
115	5	0	-7.63809	112.079	73.5184	26.299	1.91667	15.1755	3.3907	27.3333
120	5	0	-7.1099	104.969	76.3756	27.4008	2	14.2128	3.51352	27.3333
125	5	0	-6.61836	98.3509	79.0119	28.4317	2.08333	13.3167	3.62503	27.3333
130	5	0	-6.16093	92.19	81.4427	29.3965	2.16667	12.4825	3.72604	27.3333
135	5	0	-5.73523	86.4547	83.6822	30.3	2.25	11.706	3.8173	27.3333
140	5	0	-5.33907	81.1157	85.7439	31.1462	2.33333	10.9831	3.89952	27.3333
145	5	0	-4.97039	76.1453	87.64	31.9391	2.41667	10.3101	3.97335	27.3333
150	5	0	-4.62729	71.518	89.3823	32.6825	2.5	9.68353	4.03939	27.3333
155	5	0	-4.30799	67.21	90.9813	33.3796	2.58333	9.10023	4.09821	27.3333
160	5	0	-4.01084	63.1992	92.4472	34.0338	2.66667	8.55716	4.15035	27.3333
165	5	0	-3.73431	59.4649	93.7892	34.648	2.75	8.05154	4.19627	27.3333
170	5	0	-3.47696	55.9879	95.016	35.2249	2.83333	7.58076	4.23646	27.3333
175	5	0	-3.23746	52.7504	96.1357	35.7672	2.91667	7.14241	4.27131	27.3333
180	5	0	-3.01458	49.7358	97.1557	36.2771	3	6.73423	4.30123	27.3333
185	5	0	-2.80716	46.9287	98.083	36.7569	3.08333	6.35414	4.32659	27.3333
190	5	0	-2.61413	44.3146	98.9241	37.2087	3.16667	6.00019	4.34772	27.3333
195	5	0	-2.43448	41.8801	99.6851	37.6345	3.25	5.67056	4.36494	27.3333
200	5	0	-2.2673	39.6128	100.372	38.0359	3.33333	5.36357	4.37855	27.3333
205	5	0	-2.11171	37.5011	100.989	38.4147	3.41667	5.07764	4.38882	27.3333
210	5	0	-1.96692	35.5341	101.542	38.7724	3.5	4.81132	4.396	27.3333
215	5	0	-1.83216	33.702	102.035	39.1104	3.58333	4.56325	4.40033	27.3333
220	5	0	-1.70676	31.9952	102.472	39.4302	3.66667	4.33215	4.40202	27.3333
225	5	0	-1.59004	30.4052	102.858	39.7329	3.75	4.11686	4.4013	27.3333
230	5	0	-1.48143	28.9238	103.195	40.0198	3.83333	3.91628	4.39833	27.3333
235	5	0	-1.38034	27.5434	103.488	40.2918	3.91667	3.72938	4.39331	27.3333
240	5	0	-1.28627	26.2571	103.739	40.5501	4	3.55522	4.38639	27.3333
245	5	0	-1.19871	25.0584	103.952	40.7955	4.08333	3.39291	4.37773	27.3333
250	5	0	-1.11723	23.9412	104.129	41.0289	4.16667	3.24164	4.36746	27.3333
255	5	0	-1.0414	22.8998	104.272	41.2511	4.25	3.10063	4.35573	27.3333
260	5	0	-0.970823	21.929	104.385	41.463	4.33333	2.96918	4.34265	27.3333
265	5	0	-0.90514	21.0238	104.469	41.6651	4.41667	2.84663	4.32833	27.3333
270	5	0	-0.84401	20.1798	104.527	41.8582	4.5	2.73235	4.31289	27.3333
275	5	0	-0.787116	19.3927	104.559	42.0428	4.58333	2.62577	4.29642	27.3333
280	5	0	-0.734166	18.6585	104.569	42.2196	4.66667	2.52637	4.279	27.3333
285	5	0	-0.684885	17.9737	104.557	42.389	4.75	2.43363	4.26074	27.3333
290	5	0	-0.639019	17.3346	104.526	42.5516	4.83333	2.34711	4.2417	27.3333
295	5	0	-0.59633	16.7383	104.476	42.7078	4.91667	2.26637	4.22195	27.3333
300	5	0	-0.556599	16.1817	104.409	42.858	5	2.191	4.20157	27.3333
305	5	0	-0.51962	15.6621	104.327	43.0026	5.08333	2.12065	4.18061	27.3333
310	5	0	-0.485203	15.1769	104.23	43.142	5.16667	2.05495	4.15914	27.3333
315	5	0	-0.453168	14.7237	104.119	43.2766	5.25	1.99359	4.13721	27.3333
320	5	0	-0.423352	14.3004	103.996	43.4066	5.33333	1.93627	4.11487	27.3333
325	5	322.01	-0.395601	13.9048	103.861	43.5323	5.41667	1.88271	4.09217	27.3781
330	5	1087.77	-0.36977	13.9822	103.715	43.6541	5.5	1.89319	4.06914	27.5291
335	5	1086.29	-0.375677	15.1173	103.573	43.7766	5.58333	2.04689	4.04646	27.68
340	5	1084.82	-0.452395	16.1737	103.464	43.9104	5.66667	2.18992	4.02562	27.8307
345	5	1083.36	-0.523657	17.1567	103.386	44.0545	5.75	2.32302	4.00649	27.9811
350	5	1081.91	-0.589844	18.0716	103.337	44.2084	5.83333	2.44689	3.98894	28.1314
355	5	1080.46	-0.651307	18.9229	103.315	44.3712	5.91667	2.56216	3.97287	28.2815
360	5	1079.02	-0.708375	19.7152	103.318	44.5425	6	2.66943	3.95817	28.4313
365	5	1077.58	-0.761353	20.4524	103.343	44.7215	6.08333	2.76926	3.94474	28.581
370	5	1076.15	-0.810526	21.1386	103.39	44.9078	6.16667	2.86216	3.93249	28.7305
375	5	1074.73	-0.856159	21.777	103.456	45.1008	6.25	2.94861	3.92133	28.8797
380	5	1073.31	-0.898497	22.3712	103.541	45.3001	6.33333	3.02906	3.91119	29.0288
385	5	1071.9	-0.93777	22.9242	103.642	45.5052	6.41667	3.10393	3.902	29.1777
390	5	1070.5	-0.974191	23.4387	103.759	45.7157	6.5	3.1736	3.89368	29.3264
395	5	1069.1	-1.00796	23.9176	103.89	45.9313	6.58333	3.23844	3.88618	29.4748
400	5	1067.7	-1.03926	24.3632	104.034	46.1515	6.66667	3.29877	3.87943	29.6231
405	5	1066.32	-1.06826	24.7778	104.19	46.376	6.75	3.35492	3.87337	29.7712
410	5	1064.94	-1.09512	25.1637	104.358	46.6046	6.83333	3.40716	3.86797	29.9191
415	5	1063.57	-1.12	25.5228	104.536	46.8369	6.91667	3.45578	3.86317	30.0669
420	5	1062.2	-1.14303	25.8569	104.723	47.0727	7	3.50103	3.85892	30.2144
425	5	1060.84	-1.16433	26.1679	104.919	47.3117	7.08333	3.54313	3.85519	30.3617
430	5	1059.48	-1.18404	26.4572	105.123	47.5537	7.16667	3.58231	3.85194	30.5089
435	5	1058.13	-1.20226	26.7264	105.334	47.7985	7.25	3.61876	3.84913	30.6558
440	5	1056.79	-1.21909	26.977	105.552	48.0459	7.33333	3.65268	3.84673	30.8026
445	5	1055.45	-1.23463	27.2101	105.776	48.2957	7.41667	3.68425	3.84471	30.9492
450	5	1054.12	-1.24897	27.427	106.006	48.5477	7.5	3.71362	3.84303	31.0956
455	5	1052.79	-1.2622	27.6289	106.24	48.8017	7.58333	3.74095	3.84169	31.2418
460	5	1051.47	-1.27439	27.8167	106.48	49.0577	7.66667	3.76638	3.84064	31.3879
465	5	1050.16	-1.28562	27.9915	106.723	49.3154	7.75	3.79004	3.83986	31.5337
470	5	1048.85	-1.29595	28.1541	106.97	49.5747	7.83333	3.81206	3.83934	31.6794
475	5	1047.55	-1.30544	28.3054	107.221	49.8356	7.91667	3.83255	3.83906	31.8249
480	5	1046.25	-1.31416	28.4461	107.474	50.0979	8	3.8516	3.83899	31.9702
485	5	1044.96	-1.32216	28.5771	107.731	50.3615	8.08333	3.86934	3.83912	32.1153
490	5	1043.67	-1.32949	28.6989	107.99	50.6262	8.16667	3.88583	3.83944	32.2603
495	5	1042.39	-1.33619	28.8123	108.251	50.8921	8.25	3.90118	3.83992	32.4051
500	5	1041.12	-1.34231	28.9177	108.514	51.159	8.33333	3.91546	3.84056	32.5497
505	5	1039.85	-1.3479	29.0158	108.778	51.4269	8.41667	3.92874	3.84134	32.6941
510	5	1038.59	-1.35298	29.1071	109.044	51.6956	8.5	3.9411	3.84225	32.8383
515	5	1037.33	-1.35759	29.192	109.312	51.9652	8.58333	3.95259	3.84328	32.9824
520	5	1036.08	-1.36177	29.2709	109.58	52.2355	8.66667	3.96328	3.84442	33.1263
525	5	1034.83	-1.36555	29.3444	109.849	52.5064	8.75	3.97323	3.84566	33.27
530	5	1033.59	-1.36896	29.4127	110.119	52.778	8.83333	3.98248	3.84699	33.4136
535	5	1032.35	-1.37201	29.4762	110.389	53.0502	8.91667	3.99108	3.8484	33.557
540	5	1031.12	-1.37475	29.5353	110.66	53.3229	9	3.99908	3.84989	33.7002
545	5	1029.9	-1.37718	29.5902	110.931	53.5961	9.08333	4.00652	3.85144	33.8432
550	5	1028.68	-1.37934	29.6413	111.203	53.8697	9.16667	4.01343	3.85306	33.9861
555	5	1027.46	-1.38123	29.6888	111.474	54.1437	9.25	4.01986	3.85473	34.1288
560	5	1026.26	-1.38288	29.7329	111.745	54.4181	9.33333	4.02584	3.85645	34.2713
565	5	1025.05	-1.38432	29.774	112.016	54.6929	9.41667	4.0314	3.85822	34.4137
570	5	1023.85	-1.38554	29.8121	112.287	54.9679	9.5	4.03656	3.86002	34.5559
575	5	1022.66	-1.38657	29.8476	112.558	55.2432	9.58333	4.04136	3.86186	34.6979
580	5	1021.47	-1.38742	29.8805	112.828	55.5188	9.66667	4.04582	3.86373	34.8398
585	5	1020.29	-1.38811	29.9111	113.098	55.7946	9.75	4.04997	3.86563	34.9815
590	5	1019.11	-1.38864	29.9396	113.367	56.0706	9.83333	4.05382	3.86755	35.1231
595	5	1017.94	-1.38903	29.966	113.635	56.3468	9.91667	4.05739	3.86949	35.2644
600	5	1016.77	-1.38928	29.9905	113.903	56.6231	10	4.06071	3.87145	35.4057
605	5	1015.61	-1.38942	30.0133	114.17	56.8996	10.0833	4.06379	3.87342	35.5467
610	5	1014.46	-1.38944	30.0344	114.437	57.1762	10.1667	4.06666	3.87541	35.6876
615	5	1013.3	-1.38935	30.054	114.703	57.4529	10.25	4.06931	3.8774	35.8284
620	5	1012.16	-1.38917	30.0722	114.967	57.7297	10.3333	4.07178	3.8794	35.9689
625	5	1011.02	-1.38889	30.0891	115.231	58.0066	10.4167	4.07406	3.88141	36.1094
630	5	1009.88	-1.38854	30.1047	115.494	58.2835	10.5	4.07618	3.88341	36.2496
635	5	1008.75	-1.3881	30.1193	115.756	58.5605	10.5833	4.07815	3.88542	36.3897
640	5	1007.62	-1.38759	30.1327	116.018	58.8376	10.6667	4.07997	3.88743	36.5297
645	5	1006.5	-1.38702	30.1452	116.278	59.1146	10.75	4.08165	3.88944	36.6695
650	5	1005.38	-1.38639	30.1567	116.537	59.3917	10.8333	4.08322	3.89144	36.8091
655	5	1004.27	-1.3857	30.1674	116.795	59.6688	10.9167	4.08466	3.89344	36.9486
660	5	1003.16	-1.38495	30.1772	117.052	59.9459	11	4.086	3.89543	37.0879
665	5	1002.06	-1.38416	30.1864	117.308	60.223	11.0833	4.08723	3.89742	37.2271
670	5	1000.96	-1.38333	30.1948	117.563	60.5001	11.1667	4.08837	3.8994	37.3661
675	5	999.872	-1.38245	30.2026	117.817	60.7772	11.25	4.08943	3.90137	37.505
680	5	998.784	-1.38154	30.2097	118.069	61.0542	11.3333	4.0904	3.90333	37.6437
685	5	997.701	-1.38059	30.2163	118.321	61.3313	11.4167	4.09129	3.90528	37.7823
690	5	996.623	-1.37961	30.2224	118.571	61.6082	11.5	4.09212	3.90722	37.9207
695	5	995.549	-1.3786	30.228	118.821	61.8852	11.5833	4.09288	3.90914	38.059
700	5	994.48	-1.37756	30.2332	119.069	62.162	11.6667	4.09357	3.91106	38.1971
705	5	993.416	-1.3765	30.2379	119.316	62.4389	11.75	4.09421	3.91296	38.3351
710	5	992.356	-1.37542	30.2422	119.562	62.7157	11.8333	4.0948	3.91485	38.4729
715	5	991.301	-1.37431	30.2462	119.806	62.9924	11.9167	4.09533	3.91672	38.6106
720	5	990.251	-1.37319	30.2498	120.05	63.269	12	4.09582	3.91859	38.7481
725	5	989.205	-1.37205	30.2531	120.292	63.5456	12.0833	4.09627	3.92043	38.8855
730	5	988.164	-1.3709	30.2561	120.533	63.8222	12.1667	4.09667	3.92227	39.0227
735	5	987.127	-1.36973	30.2588	120.773	64.0986	12.25	4.09704	3.92408	39.1598
740	5	986.095	-1.36855	30.2613	121.012	64.375	12.3333	4.09738	3.92589	39.2968
745	5	985.068	-1.36736	30.2635	121.249	64.6513	12.4167	4.09767	3.92767	39.4336
750	5	984.044	-1.36616	30.2655	121.485	64.9275	12.5	4.09794	3.92944	39.5703
755	5	983.026	-1.36495	30.2672	121.721	65.2036	12.5833	4.09818	3.9312	39.7068
760	5	982.011	-1.36373	30.2688	121.954	65.4797	12.6667	4.0984	3.93294	39.8432
765	5	981.002	-1.36251	30.2702	122.187	65.7556	12.75	4.09859	3.93467	39.9794
770	5	979.996	-1.36128	30.2714	122.419	66.0315	12.8333	4.09875	3.93637	40.1156
775	5	978.995	-1.36004	30.2725	122.649	66.3073	12.9167	4.0989	3.93807	40.2515
780	5	977.998	-1.3588	30.2734	122.878	66.583	13	4.09902	3.93974	40.3874
785	5	977.006	-1.35756	30.2742	123.106	66.8586	13.0833	4.09912	3.9414	40.5231
790	5	976.018	-1.35631	30.2748	123.333	67.1341	13.1667	4.09921	3.94305	40.6586
795	5	975.034	-1.35506	30.2754	123.559	67.4095	13.25	4.09928	3.94467	40.794
800	5	974.055	-1.35381	30.2758	123.783	67.6848	13.3333	4.09934	3.94629	40.9293
805	5	973.079	-1.35256	30.2761	124.007	67.96	13.4167	4.09938	3.94788	41.0645
810	5	972.108	-1.3513	30.2763	124.229	68.2351	13.5	4.0994	3.94946	41.1995
815	5	971.142	-1.35005	30.2764	124.45	68.5101	13.5833	4.09942	3.95102	41.3344
820	5	970.179	-1.34879	30.2764	124.67	68.7851	13.6667	4.09942	3.95257	41.4691
825	5	969.221	-1.34754	30.2763	124.888	69.0599	13.75	4.09941	3.9541	41.6037
830	5	968.266	-1.34628	30.2762	125.106	69.3346	13.8333	4.09939	3.95561	41.7382
835	5	967.316	-1.34503	30.2759	125.322	69.6092	13.9167	4.09936	3.95711	41.8726
840	5	966.37	-1.34378	30.2757	125.537	69.8837	14	4.09932	3.95859	42.0068
845	5	965.429	-1.34253	30.2753	125.751	70.1581	14.0833	4.09928	3.96006	42.1409
850	5	964.491	-1.34128	30.2749	125.964	70.4324	14.1667	4.09922	3.96151	42.2748
855	5	963.557	-1.34003	30.2744	126.176	70.7066	14.25	4.09916	3.96295	42.4087
860	5	962.628	-1.33879	30.2739	126.387	70.9807	14.3333	4.09909	3.96437	42.5423
865	5	961.702	-1.33755	30.2734	126.596	71.2546	14.4167	4.09901	3.96577	42.6759
870	5	960.78	-1.33631	30.2728	126.805	71.5285	14.5	4.09893	3.96716	42.8094
875	5	959.863	-1.33507	30.2721	127.012	71.8023	14.5833	4.09884	3.96853	42.9427
880	5	958.949	-1.33384	30.2714	127.218	72.0759	14.6667	4.09875	3.96989	43.0759
885	5	958.04	-1.33261	30.2707	127.423	72.3495	14.75	4.09865	3.97123	43.2089
890	5	957.134	-1.33138	30.2699	127.627	72.6229	14.8333	4.09854	3.97256	43.3419
895	5	956.232	-1.33016	30.2691	127.83	72.8962	14.9167	4.09844	3.97388	43.4747
900	5	955.334	-1.32894	30.2683	128.032	73.1695	15	4.09832	3.97517	43.6074
905	5	954.44	-1.32772	30.2674	128.232	73.4426	15.0833	4.0982	3.97646	43.7399
910	5	953.55	-1.32651	30.2665	128.432	73.7156	15.1667	4.09808	3.97773	43.8724
915	5	952.664	-1.3253	30.2656	128.63	73.9885	15.25	4.09796	3.97898	44.0047
920	5	951.781	-1.32409	30.2646	128.828	74.2612	15.3333	4.09783	3.98022	44.1369
925	5	950.903	-1.32289	30.2636	129.024	74.5339	15.4167	4.0977	3.98145	44.2689
930	5	950.028	-1.3217	30.2626	129.219	74.8065	15.5	4.09756	3.98266	44.4009
935	5	949.157	-1.3205	30.2616	129.414	75.0789	15.5833	4.09742	3.98386	44.5327
940	5	948.29	-1.31931	30.2606	129.607	75.3513	15.6667	4.09728	3.98504	44.6644
945	5	947.426	-1.31813	30.2595	129.799	75.6235	15.75	4.09714	3.98621	44.796
950	5	946.566	-1.31695	30.2584	129.99	75.8956	15.8333	4.09699	3.98737	44.9275
955	5	945.71	-1.31577	30.2573	130.18	76.1676	15.9167	4.09684	3.98851	45.0588
960	5	944.858	-1.3146	30.2562	130.369	76.4395	16	4.09669	3.98964	45.19
965	5	944.009	-1.31343	30.2551	130.557	76.7113	16.0833	4.09654	3.99075	45.3212
970	5	943.164	-1.31227	30.254	130.744	76.9829	16.1667	4.09638	3.99186	45.4522
975	5	942.323	-1.31111	30.2528	130.93	77.2545	16.25	4.09623	3.99294	45.583
980	5	941.485	-1.30996	30.2516	131.115	77.5259	16.3333	4.09607	3.99402	45.7138
985	5	940.651	-1.30881	30.2504	131.299	77.7973	16.4167	4.09591	3.99508	45.8444
990	5	939.82	-1.30766	30.2492	131.482	78.0685	16.5	4.09574	3.99614	45.975
995	5	938.993	-1.30652	30.248	131.664	78.3396	16.5833	4.09558	3.99717	46.1054
1000	5	938.17	-1.30538	30.2468	131.845	78.6106	16.6667	4.09541	3.9982	46.2357
1005	5	937.35	-1.30425	30.2455	132.025	78.8815	16.75	4.09525	3.99921	46.3659
1010	5	936.534	-1.30312	30.2443	132.203	79.1523	16.8333	4.09508	4.00021	46.4959
1015	5	935.721	-1.302	30.243	132.381	79.4229	16.9167	4.09491	4.0012	46.6259
1020	5	934.911	-1.30088	30.2418	132.558	79.6935	17	4.09474	4.00218	46.7558
1025	5	934.106	-1.29977	30.2405	132.734	79.9639	17.0833	4.09456	4.00314	46.8855
1030	5	933.303	-1.29866	30.2392	132.909	80.2342	17.1667	4.09439	4.0041	47.0151
1035	5	932.504	-1.29755	30.2379	133.084	80.5044	17.25	4.09421	4.00504	47.1446
1040	5	931.709	-1.29645	30.2366	133.257	80.7745	17.3333	4.09403	4.00597	47.274
1045	5	930.917	-1.29536	30.2353	133.429	81.0445	17.4167	4.09386	4.00688	47.4033
1050	5	930.128	-1.29426	30.234	133.6	81.3144	17.5	4.09368	4.00779	47.5325
1055	5	929.343	-1.29318	30.2326	133.77	81.5841	17.5833	4.0935	4.00869	47.6616
1060	5	928.561	-1.29209	30.2313	133.94	81.8538	17.6667	4.09332	4.00957	47.7906
1065	5	927.782	-1.29101	30.2299	134.108	82.1233	17.75	4.09313	4.01044	47.9194
1070	5	927.007	-1.28994	30.2286	134.276	82.3927	17.8333	4.09295	4.0113	48.0482
1075	5	926.235	-1.28887	30.2272	134.442	82.662	17.9167	4.09277	4.01216	48.1768
1080	5	925.467	-1.28781	30.2259	134.608	82.9312	18	4.09258	4.013	48.3053
1085	5	924.702	-1.28674	30.2245	134.773	83.2003	18.0833	4.09239	4.01382	48.4338
1090	5	923.94	-1.28569	30.2231	134.936	83.4693	18.1667	4.09221	4.01464	48.5621
1095	5	923.181	-1.28464	30.2217	135.099	83.7381	18.25	4.09202	4.01545	48.6903
1100	5	922.425	-1.28359	30.2203	135.261	84.0068	18.3333	4.09183	4.01625	48.8184
1105	5	921.673	-1.28255	30.2189	135.422	84.2755	18.4167	4.09164	4.01704	48.9464
1110	5	920.924	-1.28151	30.2175	135.583	84.544	18.5	4.09145	4.01782	49.0744
1115	5	920.178	-1.28047	30.2161	135.742	84.8124	18.5833	4.09126	4.01858	49.2022
1120	5	919.436	-1.27944	30.2147	135.9	85.0807	18.6667	4.09107	4.01934	49.3299
1125	5	918.696	-1.27842	30.2133	136.058	85.3488	18.75	4.09088	4.02009	49.4575
1130	5	917.96	-1.27739	30.2118	136.215	85.6169	18.8333	4.09068	4.02083	49.5849
1135	5	917.227	-1.27638	30.2104	136.371	85.8848	18.9167	4.09049	4.02155	49.7123
1140	5	916.497	-1.27536	30.209	136.526	86.1527	19	4.0903	4.02227	49.8396
1145	5	915.77	-1.27435	30.2075	136.68	86.4204	19.0833	4.0901	4.02298	49.9668
1150	5	915.046	-1.27335	30.2061	136.833	86.688	19.1667	4.0899	4.02368	50.0939
1155	5	914.326	-1.27235	30.2046	136.985	86.9555	19.25	4.08971	4.02437	50.2209
1160	5	913.608	-1.27135	30.2032	137.137	87.2229	19.3333	4.08951	4.02505	50.3478
1165	5	912.894	-1.27036	30.2017	137.288	87.4901	19.4167	4.08931	4.02572	50.4746
1170	5	912.182	-1.26937	30.2003	137.438	87.7573	19.5	4.08911	4.02639	50.6013
1175	5	911.474	-1.26839	30.1988	137.587	88.0243	19.5833	4.08892	4.02704	50.7279
1180	5	910.768	-1.26741	30.1973	137.735	88.2912	19.6667	4.08872	4.02769	50.8544
1185	5	910.066	-1.26643	30.1958	137.882	88.5581	19.75	4.08852	4.02832	50.9808
1190	5	909.367	-1.26546	30.1944	138.029	88.8248	19.8333	4.08832	4.02895	51.1071
1195	5	908.67	-1.26449	30.1929	138.175	89.0913	19.9167	4.08811	4.02957	51.2333
1200	5	907.977	-1.26353	30.1914	138.32	89.3578	20	4.08791	4.03018	51.3594
1205	5	907.286	-1.26257	30.1899	138.464	89.6242	20.0833	4.08771	4.03078	51.4854
1210	5	906.599	-1.26162	30.1884	138.607	89.8904	20.1667	4.08751	4.03137	51.6113
1215	5	905.914	-1.26067	30.1869	138.75	90.1565	20.25	4.08731	4.03196	51.7371
1220	5	905.232	-1.25972	30.1854	138.891	90.4226	20.3333	4.0871	4.03253	51.8629
1225	5	904.554	-1.25877	30.1839	139.032	90.6885	20.4167	4.0869	4.0331	51.9885
1230	5	903.878	-1.25784	30.1824	139.172	90.9543	20.5	4.08669	4.03366	52.114
1235	5	903.205	-1.2569	30.1809	139.312	91.2199	20.5833	4.08649	4.03422	52.2395
1240	5	902.534	-1.25597	30.1793	139.45	91.4855	20.6667	4.08628	4.03476	52.3648
1245	5	901.867	-1.25504	30.1778	139.588	91.7509	20.75	4.08608	4.0353	52.4901
1250	5	901.203	-1.25412	30.1763	139.725	92.0163	20.8333	4.08587	4.03583	52.6152
1255	5	900.541	-1.2532	30.1748	139.862	92.2815	20.9167	4.08566	4.03635	52.7403
1260	5	899.882	-1.25228	30.1732	139.997	92.5466	21	4.08546	4.03686	52.8653
1265	5	899.226	-1.25137	30.1717	140.132	92.8116	21.0833	4.08525	4.03737	52.9902
1270	5	898.573	-1.25046	30.1702	140.266	93.0765	21.1667	4.08504	4.03787	53.115
1275	5	897.922	-1.24956	30.1686	140.399	93.3413	21.25	4.08483	4.03836	53.2397
1280	5	897.274	-1.24866	30.1671	140.532	93.6059	21.3333	4.08462	4.03884	53.3643
1285	5	896.629	-1.24776	30.1655	140.663	93.8705	21.4167	4.08441	4.03932	53.4889
1290	5	895.987	-1.24687	30.164	140.794	94.1349	21.5	4.0842	4.03979	53.6133
1295	5	895.347	-1.24598	30.1624	140.925	94.3992	21.5833	4.08399	4.04025	53.7377
1300	5	894.711	-1.24509	30.1609	141.054	94.6634	21.6667	4.08378	4.04071	53.8619
1305	5	894.076	-1.24421	30.1593	141.183	94.9275	21.75	4.08357	4.04116	53.9861
1310	5	893.445	-1.24333	30.1578	141.311	95.1915	21.8333	4.08336	4.0416	54.1102
1315	5	892.816	-1.24246	30.1562	141.439	95.4554	21.9167	4.08315	4.04204	54.2342
1320	5	892.19	-1.24159	30.1547	141.565	95.7191	22	4.08294	4.04247	54.3581
1325	5	891.566	-1.24072	30.1531	141.691	95.9828	22.0833	4.08273	4.04289	54.4819
1330	5	890.946	-1.23985	30.1515	141.816	96.2463	22.1667	4.08252	4.0433	54.6057
1335	5	890.327	-1.23899	30.15	141.941	96.5097	22.25	4.0823	4.04371	54.7293
1340	5	889.712	-1.23814	30.1484	142.065	96.773	22.3333	4.08209	4.04411	54.8529
1345	5	889.099	-1.23729	30.1468	142.188	97.0362	22.4167	4.08188	4.04451	54.9764
1350	5	888.488	-1.23644	30.1452	142.31	97.2993	22.5	4.08166	4.0449	55.0998
1355	5	887.88	-1.23559	30.1436	142.432	97.5622	22.5833	4.08145	4.04528	55.2231
1360	5	887.275	-1.23475	30.1421	142.553	97.8251	22.6667	4.08124	4.04566	55.3463
1365	5	886.672	-1.23391	30.1405	142.673	98.0878	22.75	4.08102	4.04603	55.4695
1370	5	886.072	-1.23307	30.1389	142.793	98.3504	22.8333	4.08081	4.04639	55.5926
1375	5	885.474	-1.23224	30.1373	142.912	98.6129	22.9167	4.08059	4.04675	55.7155
1380	5	884.879	-1.23141	30.1357	143.031	98.8753	23	4.08038	4.04711	55.8384
1385	5	884.287	-1.23059	30.1341	143.148	99.1376	23.0833	4.08016	4.04745	55.9613
1390	5	883.696	-1.22977	30.1325	143.265	99.3998	23.1667	4.07995	4.04779	56.084
1395	5	883.109	-1.22895	30.1309	143.382	99.6618	23.25	4.07973	4.04813	56.2067
1400	5	882.524	-1.22814	30.1293	143.497	99.9238	23.3333	4.07951	4.04846	56.3292
1405	5	881.941	-1.22733	30.1278	143.612	100.186	23.4167	4.0793	4.04878	56.4517
1410	5	881.361	-1.22652	30.1262	143.727	100.447	23.5	4.07908	4.0491	56.5741
1415	5	880.783	-1.22571	30.1246	143.84	100.709	23.5833	4.07886	4.04941	56.6965
1420	5	880.207	-1.22491	30.1229	143.953	100.97	23.6667	4.07865	4.04972	56.8187
1425	5	879.634	-1.22411	30.1213	144.066	101.232	23.75	4.07843	4.05002	56.9409
1430	5	879.064	-1.22332	30.1197	144.178	101.493	23.8333	4.07821	4.05032	57.063
1435	5	878.495	-1.22253	30.1181	144.289	101.754	23.9167	4.07799	4.05061	57.185
1440	5	877.93	-1.22174	30.1165	144.399	102.015	24	4.07778	4.05089	57.3069
1445	5	877.366	-1.22096	30.1149	144.509	102.276	24.0833	4.07756	4.05117	57.4288
1450	5	876.805	-1.22018	30.1133	144.618	102.537	24.1667	4.07734	4.05145	57.5506
1455	5	876.246	-1.2194	30.1117	144.727	102.798	24.25	4.07712	4.05172	57.6723
1460	5	875.69	-1.21862	30.1101	144.835	103.058	24.3333	4.0769	4.05198	57.7939
1465	5	875.136	-1.21785	30.1085	144.942	103.319	24.4167	4.07668	4.05224	57.9154
1470	5	874.584	-1.21708	30.1068	145.049	103.579	24.5	4.07647	4.0525	58.0369
1475	5	874.034	-1.21632	30.1052	145.155	103.839	24.5833	4.07625	4.05275	58.1583
1480	5	873.487	-1.21556	30.1036	145.261	104.1	24.6667	4.07603	4.05299	58.2796
1485	5	872.942	-1.2148	30.102	145.366	104.36	24.75	4.07581	4.05323	58.4008
1490	5	872.4	-1.21404	30.1004	145.47	104.62	24.8333	4.07559	4.05347	58.522
1495	5	871.86	-1.21329	30.0987	145.574	104.879	24.9167	4.07537	4.0537	58.6431
1500	5	871.321	-1.21254	30.0971	145.677	105.139	25	4.07515	4.05392	58.7641
1505	5	870.786	-1.21179	30.0955	145.78	105.399	25.0833	4.07493	4.05414	58.8851
1510	5	870.252	-1.21105	30.0939	145.882	105.658	25.1667	4.07471	4.05436	59.0059
1515	5	869.721	-1.21031	30.0922	145.983	105.917	25.25	4.07449	4.05457	59.1267
1520	5	869.191	-1.20957	30.0906	146.084	106.177	25.3333	4.07427	4.05478	59.2474
1525	5	868.665	-1.20884	30.089	146.184	106.436	25.4167	4.07405	4.05498	59.3681
1530	5	868.14	-1.20811	30.0874	146.284	106.695	25.5	4.07383	4.05518	59.4887
1535	5	867.617	-1.20738	30.0857	146.383	106.954	25.5833	4.07361	4.05538	59.6092
1540	5	867.097	-1.20665	30.0841	146.482	107.213	25.6667	4.07339	4.05557	59.7296
1545	5	866.579	-1.20593	30.0825	146.58	107.471	25.75	4.07317	4.05575	59.85
1550	5	866.063	-1.20521	30.0809	146.677	107.73	25.8333	4.07295	4.05593	59.9702
1555	5	865.549	-1.2045	30.0792	146.774	107.988	25.9167	4.07273	4.05611	60.0905
1560	5	865.037	-1.20378	30.0776	146.87	108.247	26	4.0725	4.05628	60.2106
1565	5	864.527	-1.20307	30.076	146.966	108.505	26.0833	4.07228	4.05645	60.3307
1570	5	864.02	-1.20236	30.0743	147.061	108.763	26.1667	4.07206	4.05662	60.4507
1575	5	863.514	-1.20166	30.0727	147.156	109.021	26.25	4.07184	4.05678	60.5706
1580	5	863.011	-1.20096	30.0711	147.25	109.279	26.3333	4.07162	4.05694	60.6905
1585	5	862.51	-1.20026	30.0694	147.343	109.537	26.4167	4.0714	4.05709	60.8103
1590	5	862.01	-1.19956	30.0678	147.436	109.794	26.5	4.07118	4.05724	60.93
1595	5	861.513	-1.19887	30.0662	147.529	110.052	26.5833	4.07096	4.05738	61.0497
1600	5	861.018	-1.19818	30.0645	147.62	110.309	26.6667	4.07074	4.05753	61.1692
1605	5	860.525	-1.19749	30.0629	147.712	110.567	26.75	4.07051	4.05766	61.2888
1610	5	860.034	-1.19681	30.0612	147.803	110.824	26.8333	4.07029	4.0578	61.4082
1615	5	859.545	-1.19613	30.0596	147.893	111.081	26.9167	4.07007	4.05793	61.5276
1620	5	859.058	-1.19545	30.058	147.983	111.338	27	4.06985	4.05805	61.6469
1625	5	858.574	-1.19477	30.0563	148.072	111.595	27.0833	4.06963	4.05818	61.7661
1630	5	858.091	-1.1941	30.0547	148.161	111.852	27.1667	4.06941	4.0583	61.8853
1635	5	857.61	-1.19343	30.0531	148.249	112.109	27.25	4.06918	4.05841	62.0044
1640	5	857.131	-1.19276	30.0514	148.337	112.365	27.3333	4.06896	4.05852	62.1235
1645	5	856.654	-1.1921	30.0498	148.424	112.622	27.4167	4.06874	4.05863	62.2425
1650	5	856.179	-1.19143	30.0482	148.511	112.878	27.5	4.06852	4.05874	62.3614
1655	5	855.706	-1.19077	30.0465	148.597	113.134	27.5833	4.0683	4.05884	62.4802
1660	5	855.235	-1.19012	30.0449	148.683	113.39	27.6667	4.06808	4.05894	62.599
1665	5	854.766	-1.18946	30.0432	148.768	113.646	27.75	4.06785	4.05903	62.7177
1670	5	854.299	-1.18881	30.0416	148.853	113.902	27.8333	4.06763	4.05913	62.8364
1675	5	853.833	-1.18816	30.04	148.937	114.158	27.9167	4.06741	4.05921	62.955
1680	5	853.37	-1.18752	30.0383	149.02	114.414	28	4.06719	4.0593	63.0735
1685	5	852.908	-1.18687	30.0367	149.104	114.669	28.0833	4.06697	4.05938	63.1919
1690	5	852.449	-1.18623	30.0351	149.186	114.925	28.1667	4.06675	4.05946	63.3103
1695	5	851.991	-1.18559	30.0334	149.269	115.18	28.25	4.06653	4.05954	63.4287
1700	5	851.535	-1.18496	30.0318	149.35	115.435	28.3333	4.0663	4.05961	63.5469
1705	5	851.082	-1.18432	30.0302	149.432	115.69	28.4167	4.06608	4.05968	63.6652
1710	5	850.63	-1.18369	30.0285	149.513	115.945	28.5	4.06586	4.05975	63.7833
1715	5	850.179	-1.18306	30.0269	149.593	116.2	28.5833	4.06564	4.05981	63.9014
1720	5	849.731	-1.18244	30.0253	149.673	116.455	28.6667	4.06542	4.05987	64.0194
1725	5	849.284	-1.18182	30.0236	149.752	116.71	28.75	4.0652	4.05993	64.1373
1730	5	848.84	-1.1812	30.022	149.831	116.964	28.8333	4.06498	4.05998	64.2552
1735	5	848.397	-1.18058	30.0204	149.91	117.219	28.9167	4.06476	4.06004	64.3731
1740	5	847.956	-1.17996	30.0187	149.988	117.473	29	4.06453	4.06009	64.4908
1745	5	847.517	-1.17935	30.0171	150.065	117.727	29.0833	4.06431	4.06013	64.6086
1750	5	847.079	-1.17874	30.0155	150.142	117.982	29.1667	4.06409	4.06017	64.7262
1755	5	846.643	-1.17813	30.0138	150.219	118.236	29.25	4.06387	4.06022	64.8438
1760	5	846.21	-1.17752	30.0122	150.295	118.489	29.3333	4.06365	4.06025	64.9613
1765	5	845.777	-1.17692	30.0106	150.371	118.743	29.4167	4.06343	4.06029	65.0788
1770	5	845.347	-1.17632	30.0089	150.446	118.997	29.5	4.06321	4.06032	65.1962
1775	5	844.919	-1.17572	30.0073	150.521	119.251	29.5833	4.06299	4.06035	65.3136
1780	5	844.492	-1.17513	30.0057	150.595	119.504	29.6667	4.06277	4.06038	65.4308
1785	5	844.067	-1.17453	30.004	150.669	119.757	29.75	4.06255	4.0604	65.5481
1790	5	843.643	-1.17394	30.0024	150.743	120.011	29.8333	4.06233	4.06043	65.6652
1795	5	843.222	-1.17335	30.0008	150.816	120.264	29.9167	4.06211	4.06045	65.7824
1800	5	842.802	-1.17277	29.9992	150.889	120.517	30	4.06189	4.06046	65.8994
1805	5	842.383	-1.17218	29.9975	150.961	120.77	30.0833	4.06167	4.06048	66.0164
1810	5	841.967	-1.1716	29.9959	151.033	121.023	30.1667	4.06145	4.06049	66.1334
1815	5	841.552	-1.17102	29.9943	151.104	121.275	30.25	4.06123	4.0605	66.2502
1820	5	841.139	-1.17044	29.9927	151.175	121.528	30.3333	4.06101	4.06051	66.3671
1825	5	840.727	-1.16987	29.9911	151.246	121.78	30.4167	4.06079	4.06051	66.4838
1830	5	840.318	-1.1693	29.9894	151.316	122.033	30.5	4.06057	4.06052	66.6005
1835	5	839.909	-1.16873	29.9878	151.386	122.285	30.5833	4.06035	4.06052	66.7172
1840	5	839.503	-1.16816	29.9862	151.455	122.537	30.6667	4.06013	4.06052	66.8338
1845	5	839.098	-1.16759	29.9846	151.524	122.789	30.75	4.05991	4.06051	66.9503
1850	5	838.695	-1.16703	29.983	151.592	123.041	30.8333	4.05969	4.06051	67.0668
1855	5	838.293	-1.16647	29.9813	151.66	123.293	30.9167	4.05947	4.0605	67.1833
1860	5	837.893	-1.16591	29.9797	151.728	123.545	31	4.05925	4.06049	67.2996
1865	5	837.495	-1.16536	29.9781	151.795	123.796	31.0833	4.05904	4.06047	67.4159
1870	5	837.098	-1.1648	29.9765	151.862	124.048	31.1667	4.05882	4.06046	67.5322
1875	5	836.703	-1.16425	29.9749	151.928	124.299	31.25	4.0586	4.06044	67.6484
1880	5	836.31	-1.1637	29.9733	151.994	124.55	31.3333	4.05838	4.06042	67.7646
1885	5	835.918	-1.16315	29.9717	152.06	124.802	31.4167	4.05816	4.0604	67.8807
1890	5	835.527	-1.16261	29.9701	152.125	125.053	31.5	4.05794	4.06038	67.9967
1895	5	835.139	-1.16206	29.9684	152.19	125.304	31.5833	4.05773	4.06035	68.1127
1900	5	834.751	-1.16152	29.9668	152.255	125.554	31.6667	4.05751	4.06032	68.2286
1905	5	834.366	-1.16098	29.9652	152.319	125.805	31.75	4.05729	4.0603	68.3445
1910	5	833.982	-1.16045	29.9636	152.382	126.056	31.8333	4.05707	4.06026	68.4604
1915	5	833.599	-1.15991	29.962	152.446	126.306	31.9167	4.05686	4.06023	68.5761
1920	5	833.218	-1.15938	29.9604	152.509	126.557	32	4.05664	4.0602	68.6919
1925	5	832.839	-1.15885	29.9588	152.571	126.807	32.0833	4.05642	4.06016	68.8075
1930	5	832.461	-1.15832	29.9572	152.633	127.057	32.1667	4.05621	4.06012	68.9232
1935	5	832.084	-1.15779	29.9556	152.695	127.307	32.25	4.05599	4.06008	69.0387
1940	5	831.709	-1.15727	29.954	152.757	127.557	32.3333	4.05577	4.06004	69.1542
1945	5	831.336	-1.15675	29.9524	152.818	127.807	32.4167	4.05556	4.05999	69.2697
1950	5	830.964	-1.15623	29.9508	152.878	128.057	32.5	4.05534	4.05995	69.3851
1955	5	830.593	-1.15571	29.9492	152.939	128.307	32.5833	4.05513	4.0599	69.5005
1960	5	830.224	-1.15519	29.9476	152.999	128.556	32.6667	4.05491	4.05985	69.6158
1965	5	829.857	-1.15468	29.9461	153.058	128.806	32.75	4.05469	4.0598	69.731
1970	5	829.491	-1.15417	29.9445	153.118	129.055	32.8333	4.05448	4.05974	69.8462
1975	5	829.126	-1.15366	29.9429	153.177	129.304	32.9167	4.05426	4.05969	69.9614
1980	5	828.763	-1.15315	29.9413	153.235	129.553	33	4.05405	4.05963	70.0765
1985	5	828.402	-1.15265	29.9397	153.293	129.802	33.0833	4.05383	4.05957	70.1916
1990	5	828.041	-1.15214	29.9381	153.351	130.051	33.1667	4.05362	4.05951	70.3066
1995	5	827.683	-1.15164	29.9365	153.409	130.3	33.25	4.05341	4.05945	70.4215
2000	5	827.325	-1.15114	29.935	153.466	130.549	33.3333	4.05319	4.05939	70.5364
2005	5	826.969	-1.15064	29.9334	153.522	130.797	33.4167	4.05298	4.05932	70.6513
2010	5	826.615	-1.15015	29.9318	153.579	131.046	33.5	4.05276	4.05926	70.7661
2015	5	826.262	-1.14965	29.9302	153.635	131.294	33.5833	4.05255	4.05919	70.8809
2020	5	825.91	-1.14916	29.9286	153.691	131.542	33.6667	4.05234	4.05912	70.9956
2025	5	825.56	-1.14867	29.9271	153.746	131.79	33.75	4.05212	4.05905	71.1102
2030	5	825.211	-1.14818	29.9255	153.801	132.038	33.8333	4.05191	4.05898	71.2248
2035	5	824.863	-1.1477	29.9239	153.856	132.286	33.9167	4.0517	4.05891	71.3394
2040	5	824.517	-1.14721	29.9224	153.91	132.534	34	4.05149	4.05883	71.4539
2045	5	824.172	-1.14673	29.9208	153.964	132.782	34.0833	4.05127	4.05875	71.5684
2050	5	823.829	-1.14625	29.9192	154.018	133.029	34.1667	4.05106	4.05868	71.6828
2055	5	823.487	-1.14577	29.9177	154.071	133.277	34.25	4.05085	4.0586	71.7972
2060	5	823.146	-1.14529	29.9161	154.125	133.524	34.3333	4.05064	4.05852	71.9115
2065	5	822.807	-1.14482	29.9145	154.177	133.772	34.4167	4.05043	4.05843	72.0258
2070	5	822.469	-1.14435	29.913	154.23	134.019	34.5	4.05022	4.05835	72.14
2075	5	822.132	-1.14388	29.9114	154.282	134.266	34.5833	4.05001	4.05827	72.2542
2080	5	821.797	-1.14341	29.9099	154.334	134.513	34.6667	4.04979	4.05818	72.3683
2085	5	821.463	-1.14294	29.9083	154.385	134.76	34.75	4.04958	4.05809	72.4824
2090	5	821.13	-1.14247	29.9068	154.436	135.006	34.8333	4.04937	4.058	72.5965
2095	5	820.799	-1.14201	29.9052	154.487	135.253	34.9167	4.04916	4.05791	72.7105
2100	5	820.469	-1.14155	29.9037	154.538	135.5	35	4.04895	4.05782	72.8244
2105	5	820.14	-1.14109	29.9021	154.588	135.746	35.0833	4.04874	4.05773	72.9383
2110	5	819.813	-1.14063	29.9006	154.638	135.992	35.1667	4.04854	4.05764	73.0522
2115	5	819.486	-1.14017	29.899	154.687	136.239	35.25	4.04833	4.05754	73.166
2120	5	819.161	-1.13972	29.8975	154.737	136.485	35.3333	4.04812	4.05745	73.2798
2125	5	818.838	-1.13926	29.8959	154.786	136.731	35.4167	4.04791	4.05735	73.3935
2130	5	818.515	-1.13881	29.8944	154.834	136.977	35.5	4.0477	4.05725	73.5072
2135	5	818.194	-1.13836	29.8929	154.883	137.222	35.5833	4.04749	4.05715	73.6208
2140	5	817.874	-1.13792	29.8913	154.931	137.468	35.6667	4.04728	4.05705	73.7344
2145	5	817.556	-1.13747	29.8898	154.979	137.714	35.75	4.04708	4.05695	73.848
2150	5	817.239	-1.13703	29.8883	155.026	137.959	35.8333	4.04687	4.05684	73.9615
2155	5	816.922	-1.13658	29.8867	155.073	138.205	35.9167	4.04666	4.05674	74.075
2160	5	816.608	-1.13614	29.8852	155.12	138.45	36	4.04646	4.05664	74.1884
2165	5	816.294	-1.1357	29.8837	155.167	138.695	36.0833	4.04625	4.05653	74.3017
2170	5	815.982	-1.13527	29.8822	155.213	138.94	36.1667	4.04604	4.05642	74.4151
2175	5	815.67	-1.13483	29.8806	155.259	139.185	36.25	4.04584	4.05631	74.5284
2180	5	815.36	-1.1344	29.8791	155.305	139.43	36.3333	4.04563	4.05621	74.6416
2185	5	815.052	-1.13396	29.8776	155.35	139.675	36.4167	4.04543	4.05609	74.7548
2190	5	814.744	-1.13353	29.8761	155.395	139.919	36.5	4.04522	4.05598	74.868
2195	5	814.438	-1.1331	29.8746	155.44	140.164	36.5833	4.04502	4.05587	74.9811
2200	5	814.132	-1.13268	29.8731	155.485	140.408	36.6667	4.04481	4.05576	75.0942
2205	5	813.829	-1.13225	29.8715	155.529	140.652	36.75	4.04461	4.05564	75.2072
2210	5	813.526	-1.13183	29.87	155.573	140.897	36.8333	4.0444	4.05553	75.3202
2215	5	813.224	-1.1314	29.8685	155.617	141.141	36.9167	4.0442	4.05541	75.4331
2220	5	812.924	-1.13098	29.867	155.661	141.385	37	4.044	4.0553	75.546
2225	5	812.624	-1.13056	29.8655	155.704	141.629	37.0833	4.04379	4.05518	75.6589
2230	5	812.326	-1.13014	29.864	155.747	141.872	37.1667	4.04359	4.05506	75.7717
2235	5	812.029	-1.12973	29.8625	155.789	142.116	37.25	4.04339	4.05494	75.8845
2240	5	811.733	-1.12931	29.861	155.832	142.36	37.3333	4.04318	4.05482	75.9972
2245	5	811.439	-1.1289	29.8595	155.874	142.603	37.4167	4.04298	4.0547	76.1099
2250	5	811.145	-1.12849	29.8581	155.916	142.846	37.5	4.04278	4.05458	76.2226
2255	5	810.853	-1.12808	29.8566	155.957	143.09	37.5833	4.04258	4.05445	76.3352
2260	5	810.561	-1.12767	29.8551	155.999	143.333	37.6667	4.04238	4.05433	76.4478
2265	5	810.271	-1.12727	29.8536	156.04	143.576	37.75	4.04218	4.05421	76.5603
2270	5	809.982	-1.12686	29.8521	156.081	143.819	37.8333	4.04197	4.05408	76.6728
2275	5	809.694	-1.12646	29.8506	156.121	144.062	37.9167	4.04177	4.05395	76.7853
2280	5	809.407	-1.12605	29.8491	156.162	144.304	38	4.04157	4.05383	76.8977
2285	5	809.122	-1.12565	29.8477	156.202	144.547	38.0833	4.04137	4.0537	77.0101
2290	5	808.837	-1.12525	29.8462	156.241	144.79	38.1667	4.04117	4.05357	77.1224
2295	5	808.554	-1.12486	29.8447	156.281	145.032	38.25	4.04097	4.05344	77.2347
2300	5	808.271	-1.12446	29.8433	156.32	145.274	38.3333	4.04078	4.05331	77.347
2305	5	807.99	-1.12407	29.8418	156.359	145.517	38.4167	4.04058	4.05318	77.4592
2310	5	807.71	-1.12367	29.8403	156.398	145.759	38.5	4.04038	4.05305	77.5714
2315	5	807.43	-1.12328	29.8389	156.437	146.001	38.5833	4.04018	4.05292	77.6835
2320	5	807.152	-1.12289	29.8374	156.475	146.243	38.6667	4.03998	4.05278	77.7956
2325	5	806.875	-1.1225	29.8359	156.513	146.484	38.75	4.03978	4.05265	77.9077
2330	5	806.599	-1.12212	29.8345	156.551	146.726	38.8333	4.03959	4.05252	78.0197
2335	5	806.324	-1.12173	29.833	156.589	146.968	38.9167	4.03939	4.05238	78.1317
2340	5	806.05	-1.12135	29.8316	156.626	147.209	39	4.03919	4.05225	78.2437
2345	5	805.777	-1.12096	29.8301	156.663	147.451	39.0833	4.039	4.05211	78.3556
2350	5	805.506	-1.12058	29.8287	156.7	147.692	39.1667	4.0388	4.05197	78.4675
2355	5	805.235	-1.1202	29.8272	156.736	147.933	39.25	4.03861	4.05184	78.5793
2360	5	804.965	-1.11983	29.8258	156.773	148.174	39.3333	4.03841	4.0517	78.6911
2365	5	804.696	-1.11945	29.8243	156.809	148.415	39.4167	4.03821	4.05156	78.8029
2370	5	804.429	-1.11907	29.8229	156.845	148.656	39.5	4.03802	4.05142	78.9146
2375	5	804.162	-1.1187	29.8215	156.881	148.897	39.5833	4.03783	4.05128	79.0263
2380	5	803.896	-1.11833	29.82	156.916	149.137	39.6667	4.03763	4.05114	79.1379
2385	5	803.632	-1.11795	29.8186	156.951	149.378	39.75	4.03744	4.051	79.2495
2390	5	803.368	-1.11759	29.8172	156.986	149.618	39.8333	4.03724	4.05086	79.3611
2395	5	803.105	-1.11722	29.8157	157.021	149.859	39.9167	4.03705	4.05072	79.4727
2400	5	802.844	-1.11685	29.8143	157.056	150.099	40	4.03686	4.05057	79.5842
2405	5	802.583	-1.11648	29.8129	157.09	150.339	40.0833	4.03666	4.05043	79.6956
2410	5	802.323	-1.11612	29.8115	157.124	150.579	40.1667	4.03647	4.05029	79.8071
2415	5	802.064	-1.11576	29.81	157.158	150.819	40.25	4.03628	4.05014	79.9185
2420	5	801.807	-1.11539	29.8086	157.192	151.059	40.3333	4.03609	4.05	80.0298
2425	5	801.55	-1.11503	29.8072	157.225	151.299	40.4167	4.0359	4.04985	80.1412
2430	5	801.294	-1.11468	29.8058	157.258	151.538	40.5	4.03571	4.04971	80.2525
2435	5	801.039	-1.11432	29.8044	157.291	151.778	40.5833	4.03551	4.04956	80.3637
2440	5	800.785	-1.11396	29.803	157.324	152.017	40.6667	4.03532	4.04942	80.4749
2445	5	800.532	-1.11361	29.8016	157.357	152.256	40.75	4.03513	4.04927	80.5861
2450	5	800.281	-1.11325	29.8002	157.389	152.496	40.8333	4.03494	4.04912	80.6973
2455	5	800.029	-1.1129	29.7988	157.421	152.735	40.9167	4.03475	4.04898	80.8084
2460	5	799.779	-1.11255	29.7974	157.453	152.974	41	4.03457	4.04883	80.9195
2465	5	799.53	-1.1122	29.796	157.485	153.213	41.0833	4.03438	4.04868	81.0305
2470	5	799.282	-1.11185	29.7946	157.517	153.452	41.1667	4.03419	4.04853	81.1415
2475	5	799.035	-1.1115	29.7932	157.548	153.69	41.25	4.034	4.04838	81.2525
2480	5	798.788	-1.11116	29.7918	157.579	153.929	41.3333	4.03381	4.04823	81.3634
2485	5	798.543	-1.11081	29.7904	157.61	154.167	41.4167	4.03362	4.04808	81.4743
2490	5	798.298	-1.11047	29.7891	157.641	154.406	41.5	4.03344	4.04793	81.5852
2495	5	798.055	-1.11013	29.7877	157.671	154.644	41.5833	4.03325	4.04778	81.6961
2500	5	797.812	-1.10979	29.7863	157.701	154.882	41.6667	4.03306	4.04763	81.8069
2505	5	797.57	-1.10945	29.7849	157.732	155.12	41.75	4.03288	4.04747	81.9176
2510	5	797.329	-1.10911	29.7835	157.761	155.358	41.8333	4.03269	4.04732	82.0284
2515	5	797.089	-1.10877	29.7822	157.791	155.596	41.9167	4.03251	4.04717	82.1391
2520	5	796.85	-1.10844	29.7808	157.821	155.834	42	4.03232	4.04702	82.2498
2525	5	796.612	-1.1081	29.7794	157.85	156.072	42.0833	4.03214	4.04686	82.3604
2530	5	796.375	-1.10777	29.7781	157.879	156.309	42.1667	4.03195	4.04671	82.471
2535	5	796.138	-1.10744	29.7767	157.908	156.547	42.25	4.03177	4.04656	82.5816
2540	5	795.903	-1.10711	29.7754	157.937	156.784	42.3333	4.03158	4.0464	82.6921
2545	5	795.668	-1.10678	29.774	157.965	157.021	42.4167	4.0314	4.04625	82.8026
2550	5	795.434	-1.10645	29.7727	157.994	157.259	42.5	4.03122	4.04609	82.9131
2555	5	795.201	-1.10612	29.7713	158.022	157.496	42.5833	4.03103	4.04594	83.0236
2560	5	794.969	-1.10579	29.77	158.05	157.733	42.6667	4.03085	4.04578	83.134
2565	5	794.738	-1.10547	29.7686	158.078	157.97	42.75	4.03067	4.04563	83.2443
2570	5	794.507	-1.10515	29.7673	158.105	158.206	42.8333	4.03049	4.04547	83.3547
2575	5	794.278	-1.10482	29.7659	158.133	158.443	42.9167	4.03031	4.04532	83.465
2580	5	794.049	-1.1045	29.7646	158.16	158.68	43	4.03012	4.04516	83.5753
2585	5	793.821	-1.10418	29.7632	158.187	158.916	43.0833	4.02994	4.045	83.6856
2590	5	793.594	-1.10386	29.7619	158.214	159.152	43.1667	4.02976	4.04485	83.7958
2595	5	793.368	-1.10354	29.7606	158.241	159.389	43.25	4.02958	4.04469	83.906
2600	5	793.142	-1.10323	29.7593	158.267	159.625	43.3333	4.0294	4.04453	84.0161
2605	5	792.918	-1.10291	29.7579	158.294	159.861	43.4167	4.02922	4.04437	84.1262
2610	5	792.694	-1.1026	29.7566	158.32	160.097	43.5	4.02904	4.04422	84.2363
2615	5	792.471	-1.10228	29.7553	158.346	160.333	43.5833	4.02887	4.04406	84.3464
2620	5	792.249	-1.10197	29.754	158.372	160.569	43.6667	4.02869	4.0439	84.4564
2625	5	792.028	-1.10166	29.7527	158.397	160.804	43.75	4.02851	4.04374	84.5664
2630	5	791.807	-1.10135	29.7513	158.423	161.04	43.8333	4.02833	4.04358	84.6764
2635	5	791.587	-1.10104	29.75	158.448	161.275	43.9167	4.02815	4.04342	84.7864
2640	5	791.369	-1.10074	29.7487	158.473	161.511	44	4.02798	4.04326	84.8963
2645	5	791.15	-1.10043	29.7474	158.498	161.746	44.0833	4.0278	4.0431	85.0062
2650	5	790.933	-1.10012	29.7461	158.523	161.981	44.1667	4.02762	4.04294	85.116
2655	5	790.717	-1.09982	29.7448	158.547	162.216	44.25	4.02745	4.04278	85.2258
2660	5	790.501	-1.09952	29.7435	158.572	162.451	44.3333	4.02727	4.04262	85.3356
2665	5	790.286	-1.09921	29.7422	158.596	162.686	44.4167	4.0271	4.04246	85.4454
2670	5	790.072	-1.09891	29.7409	158.62	162.921	44.5	4.02692	4.0423	85.5551
2675	5	789.858	-1.09861	29.7396	158.644	163.155	44.5833	4.02675	4.04214	85.6648
2680	5	789.646	-1.09831	29.7383	158.668	163.39	44.6667	4.02657	4.04198	85.7745
2685	5	789.434	-1.09802	29.7371	158.692	163.624	44.75	4.0264	4.04182	85.8841
2690	5	789.223	-1.09772	29.7358	158.715	163.859	44.8333	4.02622	4.04166	85.9938
2695	5	789.013	-1.09742	29.7345	158.738	164.093	44.9167	4.02605	4.0415	86.1033
2700	5	788.803	-1.09713	29.7332	158.762	164.327	45	4.02588	4.04134	86.2129
2705	5	788.594	-1.09683	29.7319	158.785	164.561	45.0833	4.02571	4.04118	86.3224
2710	5	788.386	-1.09654	29.7307	158.807	164.795	45.1667	4.02553	4.04102	86.4319
2715	5	788.179	-1.09625	29.7294	158.83	165.029	45.25	4.02536	4.04086	86.5414
2720	5	787.972	-1.09596	29.7281	158.853	165.263	45.3333	4.02519	4.0407	86.6508
2725	5	787.766	-1.09567	29.7269	158.875	165.497	45.4167	4.02502	4.04053	86.7602
2730	5	787.561	-1.09538	29.7256	158.897	165.73	45.5	4.02485	4.04037	86.8696
2735	5	787.357	-1.09509	29.7244	158.919	165.964	45.5833	4.02468	4.04021	86.979
2740	5	787.153	-1.09481	29.7231	158.941	166.197	45.6667	4.02451	4.04005	87.0883
2745	5	786.95	-1.09452	29.7218	158.963	166.43	45.75	4.02434	4.03989	87.1976
2750	5	786.748	-1.09424	29.7206	158.984	166.664	45.8333	4.02417	4.03972	87.3069
2755	5	786.547	-1.09395	29.7193	159.006	166.897	45.9167	4.024	4.03956	87.4161
2760	5	786.346	-1.09367	29.7181	159.027	167.13	46	4.02383	4.0394	87.5253
2765	5	786.146	-1.09339	29.7169	159.048	167.362	46.0833	4.02366	4.03924	87.6345
2770	5	785.947	-1.09311	29.7156	159.069	167.595	46.1667	4.02349	4.03908	87.7437
2775	5	785.748	-1.09283	29.7144	159.09	167.828	46.25	4.02333	4.03891	87.8528
2780	5	785.55	-1.09255	29.7131	159.111	168.061	46.3333	4.02316	4.03875	87.9619
2785	5	785.353	-1.09227	29.7119	159.131	168.293	46.4167	4.02299	4.03859	88.071
2790	5	785.156	-1.092	29.7107	159.152	168.525	46.5	4.02282	4.03843	88.18
2795	5	784.961	-1.09172	29.7094	159.172	168.758	46.5833	4.02266	4.03826	88.2891
2800	5	784.765	-1.09145	29.7082	159.192	168.99	46.6667	4.02249	4.0381	88.3981
2805	5	784.571	-1.09117	29.707	159.212	169.222	46.75	4.02233	4.03794	88.507
2810	5	784.377	-1.0909	29.7058	159.232	169.454	46.8333	4.02216	4.03777	88.616
2815	5	784.184	-1.09063	29.7046	159.252	169.686	46.9167	4.022	4.03761	88.7249
2820	5	783.992	-1.09036	29.7033	159.271	169.918	47	4.02183	4.03745	88.8338
2825	5	783.8	-1.09009	29.7021	159.291	170.149	47.0833	4.02167	4.03729	88.9426
2830	5	783.609	-1.08982	29.7009	159.31	170.381	47.1667	4.0215	4.03712	89.0515
2835	5	783.419	-1.08955	29.6997	159.329	170.613	47.25	4.02134	4.03696	89.1603
2840	5	783.229	-1.08929	29.6985	159.348	170.844	47.3333	4.02118	4.0368	89.2691
2845	5	783.04	-1.08902	29.6973	159.367	171.075	47.4167	4.02102	4.03664	89.3778
2850	5	782.852	-1.08875	29.6961	159.386	171.307	47.5	4.02085	4.03647	89.4865
2855	5	782.664	-1.08849	29.6949	159.404	171.538	47.5833	4.02069	4.03631	89.5952
2860	5	782.477	-1.08823	29.6937	159.423	171.769	47.6667	4.02053	4.03615	89.7039
2865	5	782.291	-1.08796	29.6925	159.441	172	47.75	4.02037	4.03598	89.8126
2870	5	782.105	-1.0877	29.6913	159.459	172.23	47.8333	4.02021	4.03582	89.9212
2875	5	781.92	-1.08744	29.6902	159.478	172.461	47.9167	4.02005	4.03566	90.0298
2880	5	781.735	-1.08718	29.689	159.495	172.692	48	4.01989	4.0355	90.1384
2885	5	781.551	-1.08692	29.6878	159.513	172.922	48.0833	4.01973	4.03533	90.2469
2890	5	781.368	-1.08667	29.6866	159.531	173.153	48.1667	4.01957	4.03517	90.3554
2895	5	781.186	-1.08641	29.6854	159.549	173.383	48.25	4.01941	4.03501	90.4639
2900	5	781.004	-1.08615	29.6843	159.566	173.613	48.3333	4.01925	4.03485	90.5724
2905	5	780.823	-1.0859	29.6831	159.583	173.844	48.4167	4.01909	4.03468	90.6809
2910	5	780.642	-1.08564	29.6819	159.601	174.074	48.5	4.01893	4.03452	90.7893
2915	5	780.462	-1.08539	29.6808	159.618	174.304	48.5833	4.01878	4.03436	90.8977
2920	5	780.282	-1.08514	29.6796	159.635	174.533	48.6667	4.01862	4.0342	91.0061
2925	5	780.104	-1.08489	29.6784	159.651	174.763	48.75	4.01846	4.03403	91.1144
2930	5	779.925	-1.08463	29.6773	159.668	174.993	48.8333	4.0183	4.03387	91.2227
2935	5	779.748	-1.08438	29.6761	159.685	175.222	48.9167	4.01815	4.03371	91.331
2940	5	779.571	-1.08413	29.675	159.701	175.452	49	4.01799	4.03355	91.4393
2945	5	779.395	-1.08389	29.6738	159.717	175.681	49.0833	4.01784	4.03338	91.5475
2950	5	779.219	-1.08364	29.6727	159.734	175.911	49.1667	4.01768	4.03322	91.6558
2955	5	779.044	-1.08339	29.6715	159.75	176.14	49.25	4.01753	4.03306	91.764
2960	5	778.869	-1.08315	29.6704	159.766	176.369	49.3333	4.01737	4.0329	91.8721
2965	5	778.695	-1.0829	29.6693	159.782	176.598	49.4167	4.01722	4.03274	91.9803
2970	5	778.522	-1.08266	29.6681	159.797	176.827	49.5	4.01706	4.03257	92.0884
2975	5	778.349	-1.08241	29.667	159.813	177.055	49.5833	4.01691	4.03241	92.1965
2980	5	778.177	-1.08217	29.6659	159.828	177.284	49.6667	4.01676	4.03225	92.3046
2985	5	778.005	-1.08193	29.6647	159.844	177.513	49.75	4.0166	4.03209	92.4127
2990	5	777.834	-1.08169	29.6636	159.859	177.741	49.8333	4.01645	4.03193	92.5207
2995	5	777.664	-1.08145	29.6625	159.874	177.97	49.9167	4.0163	4.03177	92.6287
3000	5	777.494	-1.08121	29.6614	159.889	178.198	50	4.01615	4.03161	92.7367
3005	5	777.325	-1.08097	29.6603	159.904	178.426	50.0833	4.016	4.03145	92.8447
3010	5	777.156	-1.08073	29.6591	159.919	178.654	50.1667	4.01585	4.03128	92.9526
3015	5	776.988	-1.0805	29.658	159.934	178.882	50.25	4.0157	4.03112	93.0605
3020	5	776.82	-1.08026	29.6569	159.949	179.11	50.3333	4.01555	4.03096	93.1684
3025	5	776.654	-1.08002	29.6558	159.963	179.338	50.4167	4.0154	4.0308	93.2763
3030	5	776.487	-1.07979	29.6547	159.977	179.566	50.5	4.01525	4.03064	93.3841
3035	5	776.321	-1.07956	29.6536	159.992	179.794	50.5833	4.0151	4.03048	93.4919
3040	5	776.156	-1.07932	29.6525	160.006	180.021	50.6667	4.01495	4.03032	93.5997
3045	5	775.991	-1.07909	29.6514	160.02	180.249	50.75	4.0148	4.03016	93.7075
3050	5	775.827	-1.07886	29.6503	160.034	180.476	50.8333	4.01465	4.03	93.8153
3055	5	775.663	-1.07863	29.6492	160.048	180.703	50.9167	4.0145	4.02984	93.923
3060	5	775.5	-1.0784	29.6481	160.062	180.931	51	4.01436	4.02968	94.0307
3065	5	775.338	-1.07817	29.647	160.075	181.158	51.0833	4.01421	4.02952	94.1384
3070	5	775.176	-1.07794	29.646	160.089	181.385	51.1667	4.01406	4.02936	94.2461
3075	5	775.014	-1.07771	29.6449	160.102	181.611	51.25	4.01392	4.0292	94.3537
3080	5	774.853	-1.07749	29.6438	160.116	181.838	51.3333	4.01377	4.02904	94.4613
3085	5	774.693	-1.07726	29.6427	160.129	182.065	51.4167	4.01363	4.02888	94.5689
3090	5	774.533	-1.07703	29.6417	160.142	182.292	51.5	4.01348	4.02872	94.6765
3095	5	774.374	-1.07681	29.6406	160.155	182.518	51.5833	4.01334	4.02857	94.784
3100	5	774.215	-1.07659	29.6395	160.168	182.745	51.6667	4.01319	4.02841	94.8916
3105	5	774.057	-1.07636	29.6385	160.181	182.971	51.75	4.01305	4.02825	94.9991
3110	5	773.899	-1.07614	29.6374	160.194	183.197	51.8333	4.0129	4.02809	95.1066
3115	5	773.742	-1.07592	29.6363	160.206	183.423	51.9167	4.01276	4.02793	95.214
3120	5	773.585	-1.0757	29.6353	160.219	183.649	52	4.01262	4.02777	95.3215
3125	5	773.429	-1.07548	29.6342	160.231	183.875	52.0833	4.01247	4.02762	95.4289
3130	5	773.273	-1.07526	29.6332	160.244	184.101	52.1667	4.01233	4.02746	95.5363
3135	5	773.118	-1.07504	29.6321	160.256	184.327	52.25	4.01219	4.0273	95.6437
3140	5	772.963	-1.07482	29.6311	160.268	184.553	52.3333	4.01205	4.02714	95.751
3145	5	772.809	-1.0746	29.63	160.28	184.778	52.4167	4.01191	4.02698	95.8584
3150	5	772.655	-1.07439	29.629	160.292	185.004	52.5	4.01177	4.02683	95.9657
3155	5	772.502	-1.07417	29.628	160.304	185.229	52.5833	4.01162	4.02667	96.073
3160	5	772.349	-1.07396	29.6269	160.316	185.454	52.6667	4.01148	4.02651	96.1802
3165	5	772.197	-1.07374	29.6259	160.327	185.679	52.75	4.01134	4.02636	96.2875
3170	5	772.046	-1.07353	29.6249	160.339	185.905	52.8333	4.0112	4.0262	96.3947
3175	5	771.894	-1.07331	29.6238	160.351	186.13	52.9167	4.01107	4.02604	96.5019
3180	5	771.744	-1.0731	29.6228	160.362	186.355	53	4.01093	4.02589	96.6091
3185	5	771.594	-1.07289	29.6218	160.373	186.579	53.0833	4.01079	4.02573	96.7163
3190	5	771.444	-1.07268	29.6208	160.385	186.804	53.1667	4.01065	4.02558	96.8234
3195	5	771.295	-1.07247	29.6197	160.396	187.029	53.25	4.01051	4.02542	96.9305
3200	5	771.146	-1.07226	29.6187	160.407	187.253	53.3333	4.01037	4.02527	97.0376
3205	5	770.998	-1.07205	29.6177	160.418	187.478	53.4167	4.01024	4.02511	97.1447
3210	5	770.85	-1.07184	29.6167	160.429	187.702	53.5	4.0101	4.02496	97.2518
3215	5	770.703	-1.07163	29.6157	160.44	187.926	53.5833	4.00996	4.0248	97.3588
3220	5	770.556	-1.07143	29.6147	160.45	188.151	53.6667	4.00983	4.02465	97.4659
3225	5	770.41	-1.07122	29.6137	160.461	188.375	53.75	4.00969	4.02449	97.5729
3230	5	770.264	-1.07101	29.6127	160.471	188.599	53.8333	4.00956	4.02434	97.6798
3235	5	770.118	-1.07081	29.6117	160.482	188.822	53.9167	4.00942	4.02418	97.7868
3240	5	769.973	-1.0706	29.6107	160.492	189.046	54	4.00929	4.02403	97.8937
3245	5	769.829	-1.0704	29.6097	160.503	189.27	54.0833	4.00915	4.02388	98.0007
3250	5	769.685	-1.0702	29.6087	160.513	189.494	54.1667	4.00902	4.02372	98.1076
3255	5	769.541	-1.06999	29.6077	160.523	189.717	54.25	4.00889	4.02357	98.2144
3260	5	769.398	-1.06979	29.6067	160.533	189.941	54.3333	4.00875	4.02342	98.3213
3265	5	769.256	-1.06959	29.6058	160.543	190.164	54.4167	4.00862	4.02326	98.4281
3270	5	769.113	-1.06939	29.6048	160.553	190.387	54.5	4.00849	4.02311	98.535
3275	5	768.972	-1.06919	29.6038	160.563	190.61	54.5833	4.00836	4.02296	98.6418
3280	5	768.83	-1.06899	29.6028	160.572	190.833	54.6667	4.00822	4.02281	98.7485
3285	5	768.69	-1.06879	29.6019	160.582	191.056	54.75	4.00809	4.02265	98.8553
3290	5	768.549	-1.06859	29.6009	160.592	191.279	54.8333	4.00796	4.0225	98.9621
3295	5	768.409	-1.0684	29.5999	160.601	191.502	54.9167	4.00783	4.02235	99.0688
3300	5	768.27	-1.0682	29.599	160.61	191.725	55	4.0077	4.0222	99.1755
3305	5	768.131	-1.068	29.598	160.62	191.947	55.0833	4.00757	4.02205	99.2822
3310	5	767.992	-1.06781	29.597	160.629	192.17	55.1667	4.00744	4.0219	99.3888
3315	5	767.854	-1.06761	29.5961	160.638	192.392	55.25	4.00731	4.02175	99.4955
3320	5	767.716	-1.06742	29.5951	160.647	192.615	55.3333	4.00718	4.0216	99.6021
3325	5	767.579	-1.06722	29.5942	160.656	192.837	55.4167	4.00705	4.02145	99.7087
3330	5	767.442	-1.06703	29.5932	160.665	193.059	55.5	4.00692	4.0213	99.8153
3335	5	767.305	-1.06684	29.5923	160.674	193.281	55.5833	4.0068	4.02115	99.9219
3340	5	767.169	-1.06664	29.5914	160.683	193.503	55.6667	4.00667	4.021	100.028
3345	5	767.034	-1.06645	29.5904	160.692	193.725	55.75	4.00654	4.02085	100.135
3350	5	766.899	-1.06626	29.5895	160.7	193.947	55.8333	4.00641	4.0207	100.241
3355	5	766.764	-1.06607	29.5885	160.709	194.168	55.9167	4.00629	4.02055	100.348
3360	5	766.629	-1.06588	29.5876	160.718	194.39	56	4.00616	4.0204	100.454
3365	5	766.495	-1.06569	29.5867	160.726	194.611	56.0833	4.00604	4.02025	100.561
3370	5	766.362	-1.0655	29.5857	160.734	194.833	56.1667	4.00591	4.0201	100.667
3375	5	766.229	-1.06532	29.5848	160.743	195.054	56.25	4.00578	4.01996	100.774
3380	5	766.096	-1.06513	29.5839	160.751	195.275	56.3333	4.00566	4.01981	100.88
3385	5	765.964	-1.06494	29.583	160.759	195.497	56.4167	4.00553	4.01966	100.987
3390	5	765.832	-1.06476	29.5821	160.767	195.718	56.5	4.00541	4.01951	101.093
3395	5	765.7	-1.06457	29.5811	160.775	195.939	56.5833	4.00529	4.01937	101.199
3400	5	765.569	-1.06439	29.5802	160.783	196.159	56.6667	4.00516	4.01922	101.306
3405	5	765.439	-1.0642	29.5793	160.791	196.38	56.75	4.00504	4.01907	101.412
3410	5	765.308	-1.06402	29.5784	160.799	196.601	56.8333	4.00492	4.01893	101.518
3415	5	765.179	-1.06383	29.5775	160.807	196.821	56.9167	4.00479	4.01878	101.624
3420	5	765.049	-1.06365	29.5766	160.814	197.042	57	4.00467	4.01864	101.731
3425	5	764.92	-1.06347	29.5757	160.822	197.262	57.0833	4.00455	4.01849	101.837
3430	5	764.791	-1.06329	29.5748	160.829	197.483	57.1667	4.00443	4.01834	101.943
3435	5	764.663	-1.06311	29.5739	160.837	197.703	57.25	4.00431	4.0182	102.049
3440	5	764.535	-1.06292	29.573	160.844	197.923	57.3333	4.00419	4.01806	102.156
3445	5	764.408	-1.06274	29.5721	160.852	198.143	57.4167	4.00407	4.01791	102.262
3450	5	764.28	-1.06256	29.5712	160.859	198.363	57.5	4.00395	4.01777	102.368
3455	5	764.154	-1.06239	29.5704	160.866	198.583	57.5833	4.00383	4.01762	102.474
3460	5	764.027	-1.06221	29.5695	160.873	198.803	57.6667	4.00371	4.01748	102.58
3465	5	763.901	-1.06203	29.5686	160.88	199.022	57.75	4.00359	4.01733	102.686
3470	5	763.776	-1.06185	29.5677	160.887	199.242	57.8333	4.00347	4.01719	102.792
3475	5	763.651	-1.06167	29.5668	160.894	199.462	57.9167	4.00335	4.01705	102.898
3480	5	763.526	-1.0615	29.566	160.901	199.681	58	4.00323	4.01691	103.004
3485	5	763.401	-1.06132	29.5651	160.908	199.9	58.0833	4.00311	4.01676	103.11
3490	5	763.277	-1.06115	29.5642	160.915	200.12	58.1667	4.003	4.01662	103.216
3495	5	763.153	-1.06097	29.5634	160.922	200.339	58.25	4.00288	4.01648	103.322
3500	5	763.03	-1.0608	29.5625	160.928	200.558	58.3333	4.00276	4.01634	103.428
3505	5	762.907	-1.06062	29.5616	160.935	200.777	58.4167	4.00265	4.0162	103.534
3510	5	762.784	-1.06045	29.5608	160.941	200.996	58.5	4.00253	4.01605	103.64
3515	5	762.662	-1.06028	29.5599	160.948	201.214	58.5833	4.00241	4.01591	103.746
3520	5	762.54	-1.06011	29.5591	160.954	201.433	58.6667	4.0023	4.01577	103.852
3525	5	762.419	-1.05993	29.5582	160.961	201.652	58.75	4.00218	4.01563	103.958
3530	5	762.298	-1.05976	29.5574	160.967	201.87	58.8333	4.00207	4.01549	104.064
3535	5	762.177	-1.05959	29.5565	160.973	202.089	58.9167	4.00195	4.01535	104.17
3540	5	762.056	-1.05942	29.5557	160.979	202.307	59	4.00184	4.01521	104.276
3545	5	761.936	-1.05925	29.5548	160.986	202.525	59.0833	4.00173	4.01507	104.381
3550	5	761.816	-1.05908	29.554	160.992	202.743	59.1667	4.00161	4.01493	104.487
3555	5	761.697	-1.05891	29.5532	160.998	202.962	59.25	4.0015	4.0148	104.593
3560	5	761.578	-1.05875	29.5523	161.004	203.18	59.3333	4.00139	4.01466	104.699
3565	5	761.459	-1.05858	29.5515	161.01	203.397	59.4167	4.00127	4.01452	104.805
3570	5	761.341	-1.05841	29.5507	161.015	203.615	59.5	4.00116	4.01438	104.91
3575	5	761.223	-1.05824	29.5499	161.021	203.833	59.5833	4.00105	4.01424	105.016
3580	5	761.105	-1.05808	29.549	161.027	204.051	59.6667	4.00094	4.01411	105.122
3585	5	760.988	-1.05791	29.5482	161.033	204.268	59.75	4.00083	4.01397	105.227
3590	5	760.871	-1.05775	29.5474	161.038	204.486	59.8333	4.00072	4.01383	105.333
3595	5	760.754	-1.05758	29.5466	161.044	204.703	59.9167	4.00061	4.01369	105.439
3600	10	760.522	-2.11462	29.5452	161.055	205.138	60	4.00041	4.01356	105.65
3610	10	760.29	-2.11399	29.5437	161.066	205.572	60.1667	4.00022	4.01328	105.861
3620	10	760.06	-2.11336	29.5423	161.077	206.006	60.3333	4.00003	4.01301	106.072
3630	10	759.832	-2.11274	29.5408	161.087	206.439	60.5	3.99983	4.01274	106.283
3640	10	759.605	-2.11211	29.5394	161.097	206.872	60.6667	3.99963	4.01247	106.494
3650	10	759.379	-2.11149	29.5379	161.107	207.305	60.8333	3.99943	4.0122	106.705
3660	10	759.154	-2.11087	29.5364	161.117	207.738	61	3.99923	4.01194	106.916
3670	10	758.93	-2.11025	29.5349	161.127	208.17	61.1667	3.99903	4.01167	107.127
3680	10	758.708	-2.10963	29.5334	161.136	208.601	61.3333	3.99883	4.01141	107.338
3690	10	758.487	-2.10901	29.5319	161.146	209.033	61.5	3.99862	4.01115	107.549
3700	10	758.268	-2.10839	29.5305	161.155	209.464	61.6667	3.99842	4.01089	107.759
3710	10	758.049	-2.10778	29.529	161.164	209.895	61.8333	3.99822	4.01063	107.97
3720	10	757.832	-2.10717	29.5275	161.173	210.325	62	3.99802	4.01037	108.18
3730	10	757.616	-2.10656	29.526	161.181	210.755	62.1667	3.99782	4.01011	108.391
3740	10	757.401	-2.10596	29.5245	161.19	211.185	62.3333	3.99762	4.00985	108.601
3750	10	757.188	-2.10536	29.5231	161.198	211.614	62.5	3.99742	4.0096	108.811
3760	10	756.975	-2.10476	29.5216	161.206	212.043	62.6667	3.99723	4.00935	109.022
3770	10	756.764	-2.10416	29.5202	161.214	212.472	62.8333	3.99703	4.00909	109.232
3780	10	756.554	-2.10357	29.5187	161.222	212.9	63	3.99684	4.00884	109.442
3790	10	756.345	-2.10298	29.5173	161.229	213.328	63.1667	3.99664	4.00859	109.652
3800	10	756.137	-2.10239	29.5159	161.237	213.756	63.3333	3.99645	4.00834	109.862
3810	10	755.93	-2.1018	29.5144	161.244	214.183	63.5	3.99625	4.00809	110.072
3820	10	755.725	-2.10122	29.513	161.251	214.61	63.6667	3.99606	4.00785	110.282
3830	10	755.52	-2.10064	29.5116	161.258	215.036	63.8333	3.99587	4.0076	110.492
3840	10	755.317	-2.10007	29.5102	161.265	215.462	64	3.99568	4.00736	110.702
3850	10	755.115	-2.09949	29.5088	161.271	215.888	64.1667	3.99549	4.00711	110.911
3860	10	754.913	-2.09892	29.5074	161.278	216.314	64.3333	3.99531	4.00687	111.121
3870	10	754.713	-2.09836	29.5061	161.284	216.739	64.5	3.99512	4.00663	111.331
3880	10	754.514	-2.09779	29.5047	161.29	217.164	64.6667	3.99494	4.00639	111.54
3890	10	754.316	-2.09723	29.5033	161.296	217.588	64.8333	3.99475	4.00615	111.75
3900	10	754.119	-2.09667	29.502	161.302	218.013	65	3.99457	4.00591	111.959
3910	10	753.923	-2.09612	29.5006	161.308	218.436	65.1667	3.99439	4.00568	112.169
3920	10	753.728	-2.09556	29.4993	161.314	218.86	65.3333	3.99421	4.00544	112.378
3930	10	753.534	-2.09501	29.498	161.319	219.283	65.5	3.99403	4.00521	112.588
3940	10	753.342	-2.09447	29.4967	161.324	219.706	65.6667	3.99385	4.00497	112.797
3950	10	753.15	-2.09392	29.4954	161.33	220.128	65.8333	3.99367	4.00474	113.006
3960	10	752.959	-2.09338	29.4941	161.335	220.55	66	3.9935	4.00451	113.215
3970	10	752.769	-2.09284	29.4928	161.34	220.972	66.1667	3.99332	4.00428	113.424
3980	10	752.58	-2.09231	29.4915	161.344	221.394	66.3333	3.99315	4.00405	113.633
3990	10	752.392	-2.09177	29.4902	161.349	221.815	66.5	3.99298	4.00383	113.842
4000	10	752.205	-2.09124	29.489	161.354	222.236	66.6667	3.9928	4.0036	114.051
4010	10	752.019	-2.09071	29.4877	161.358	222.656	66.8333	3.99263	4.00338	114.26
4020	10	751.834	-2.09019	29.4864	161.363	223.076	67	3.99246	4.00315	114.469
4030	10	751.649	-2.08967	29.4852	161.367	223.496	67.1667	3.9923	4.00293	114.678
4040	10	751.466	-2.08915	29.484	161.371	223.915	67.3333	3.99213	4.00271	114.887
4050	10	751.284	-2.08863	29.4828	161.375	224.335	67.5	3.99196	4.00249	115.095
4060	10	751.102	-2.08811	29.4815	161.379	224.753	67.6667	3.9918	4.00227	115.304
4070	10	750.922	-2.0876	29.4803	161.382	225.172	67.8333	3.99164	4.00205	115.512
4080	10	750.742	-2.08709	29.4791	161.386	225.59	68	3.99147	4.00183	115.721
4090	10	750.563	-2.08658	29.4779	161.39	226.008	68.1667	3.99131	4.00162	115.929
4100	10	750.385	-2.08608	29.4768	161.393	226.425	68.3333	3.99115	4.0014	116.138
4110	10	750.208	-2.08558	29.4756	161.396	226.842	68.5	3.99099	4.00119	116.346
4120	10	750.032	-2.08508	29.4744	161.4	227.259	68.6667	3.99084	4.00098	116.555
4130	10	749.856	-2.08458	29.4733	161.403	227.675	68.8333	3.99068	4.00076	116.763
4140	10	749.682	-2.08408	29.4721	161.406	228.091	69	3.99052	4.00055	116.971
4150	10	749.508	-2.08359	29.471	161.409	228.507	69.1667	3.99037	4.00034	117.179
4160	10	749.335	-2.0831	29.4698	161.412	228.923	69.3333	3.99022	4.00014	117.388
4170	10	749.163	-2.08261	29.4687	161.414	229.338	69.5	3.99006	3.99993	117.596
4180	10	748.992	-2.08213	29.4676	161.417	229.753	69.6667	3.98991	3.99972	117.804
4190	10	748.822	-2.08164	29.4665	161.42	230.167	69.8333	3.98976	3.99952	118.012
4200	10	748.652	-2.08116	29.4654	161.422	230.581	70	3.98961	3.99932	118.22
4210	10	748.483	-2.08068	29.4643	161.424	230.995	70.1667	3.98947	3.99911	118.428
4220	10	748.315	-2.08021	29.4632	161.427	231.408	70.3333	3.98932	3.99891	118.635
4230	10	748.148	-2.07973	29.4621	161.429	231.822	70.5	3.98917	3.99871	118.843
4240	10	747.981	-2.07926	29.4611	161.431	232.234	70.6667	3.98903	3.99851	119.051
4250	10	747.816	-2.07879	29.46	161.433	232.647	70.8333	3.98888	3.99832	119.259
4260	10	747.651	-2.07832	29.459	161.435	233.059	71	3.98874	3.99812	119.466
4270	10	747.487	-2.07785	29.4579	161.437	233.471	71.1667	3.9886	3.99792	119.674
4280	10	747.323	-2.07739	29.4569	161.439	233.882	71.3333	3.98846	3.99773	119.882
4290	10	747.16	-2.07693	29.4558	161.44	234.294	71.5	3.98832	3.99754	120.089
4300	10	746.998	-2.07647	29.4548	161.442	234.704	71.6667	3.98818	3.99734	120.297
4310	10	746.837	-2.07601	29.4538	161.443	235.115	71.8333	3.98804	3.99715	120.504
4320	10	746.677	-2.07556	29.4528	161.445	235.525	72	3.98791	3.99696	120.712
4330	10	746.517	-2.0751	29.4518	161.446	235.935	72.1667	3.98777	3.99678	120.919
4340	10	746.358	-2.07465	29.4508	161.448	236.345	72.3333	3.98764	3.99659	121.126
4350	10	746.199	-2.0742	29.4498	161.449	236.754	72.5	3.9875	3.9964	121.334
4360	10	746.042	-2.07375	29.4488	161.45	237.163	72.6667	3.98737	3.99622	121.541
4370	10	745.885	-2.07331	29.4479	161.451	237.571	72.8333	3.98724	3.99603	121.748
4380	10	745.728	-2.07287	29.4469	161.452	237.98	73	3.98711	3.99585	121.955
4390	10	745.573	-2.07242	29.4459	161.453	238.388	73.1667	3.98698	3.99567	122.162
4400	10	745.418	-2.07198	29.445	161.454	238.795	73.3333	3.98685	3.99548	122.369
4410	10	745.264	-2.07155	29.4441	161.455	239.203	73.5	3.98672	3.9953	122.576
4420	10	745.11	-2.07111	29.4431	161.456	239.61	73.6667	3.9866	3.99513	122.783
4430	10	744.957	-2.07068	29.4422	161.456	240.016	73.8333	3.98647	3.99495	122.99
4440	10	744.805	-2.07024	29.4413	161.457	240.423	74	3.98635	3.99477	123.197
4450	10	744.653	-2.06981	29.4404	161.458	240.829	74.1667	3.98622	3.9946	123.404
4460	10	744.502	-2.06939	29.4395	161.458	241.234	74.3333	3.9861	3.99442	123.611
4470	10	744.352	-2.06896	29.4386	161.459	241.64	74.5	3.98598	3.99425	123.817
4480	10	744.202	-2.06853	29.4377	161.459	242.045	74.6667	3.98586	3.99408	124.024
4490	10	744.053	-2.06811	29.4368	161.46	242.45	74.8333	3.98574	3.9939	124.231
4500	10	743.904	-2.06769	29.4359	161.46	242.854	75	3.98562	3.99373	124.438
4510	10	743.756	-2.06727	29.435	161.46	243.258	75.1667	3.9855	3.99357	124.644
4520	10	743.609	-2.06685	29.4342	161.46	243.662	75.3333	3.98539	3.9934	124.851
4530	10	743.462	-2.06644	29.4333	161.461	244.066	75.5	3.98527	3.99323	125.057
4540	10	743.316	-2.06602	29.4325	161.461	244.469	75.6667	3.98516	3.99306	125.264
4550	10	743.171	-2.06561	29.4316	161.461	244.872	75.8333	3.98504	3.9929	125.47
4560	10	743.026	-2.0652	29.4308	161.461	245.274	76	3.98493	3.99274	125.677
4570	10	742.881	-2.06479	29.43	161.461	245.676	76.1667	3.98482	3.99257	125.883
4580	10	742.738	-2.06438	29.4291	161.461	246.078	76.3333	3.98471	3.99241	126.089
4590	10	742.594	-2.06398	29.4283	161.46	246.48	76.5	3.9846	3.99225	126.295
4600	10	742.452	-2.06357	29.4275	161.46	246.881	76.6667	3.98449	3.99209	126.502
4610	10	742.31	-2.06317	29.4267	161.46	247.282	76.8333	3.98438	3.99193	126.708
4620	10	742.168	-2.06277	29.4259	161.46	247.683	77	3.98427	3.99178	126.914
4630	10	742.027	-2.06237	29.4251	161.459	248.083	77.1667	3.98416	3.99162	127.12
4640	10	741.887	-2.06197	29.4244	161.459	248.483	77.3333	3.98406	3.99146	127.326
4650	10	741.747	-2.06157	29.4236	161.459	248.883	77.5	3.98395	3.99131	127.532
4660	10	741.608	-2.06118	29.4228	161.458	249.283	77.6667	3.98385	3.99116	127.738
4670	10	741.469	-2.06078	29.4221	161.458	249.682	77.8333	3.98375	3.991	127.944
4680	10	741.331	-2.06039	29.4213	161.457	250.08	78	3.98364	3.99085	128.15
4690	10	741.193	-2.06	29.4205	161.457	250.479	78.1667	3.98354	3.9907	128.356
4700	10	741.056	-2.05961	29.4198	161.456	250.877	78.3333	3.98344	3.99055	128.562
4710	10	740.919	-2.05922	29.4191	161.455	251.275	78.5	3.98334	3.9904	128.768
4720	10	740.783	-2.05884	29.4183	161.455	251.673	78.6667	3.98324	3.99026	128.974
4730	10	740.648	-2.05845	29.4176	161.454	252.07	78.8333	3.98314	3.99011	129.179
4740	10	740.512	-2.05807	29.4169	161.453	252.467	79	3.98305	3.98997	129.385
4750	10	740.378	-2.05769	29.4162	161.453	252.863	79.1667	3.98295	3.98982	129.591
4760	10	740.244	-2.05731	29.4155	161.452	253.26	79.3333	3.98286	3.98968	129.796
4770	10	740.11	-2.05693	29.4148	161.451	253.656	79.5	3.98276	3.98954	130.002
4780	10	739.977	-2.05655	29.4141	161.45	254.052	79.6667	3.98267	3.98939	130.207
4790	10	739.844	-2.05618	29.4134	161.449	254.447	79.8333	3.98257	3.98925	130.413
4800	10	739.712	-2.0558	29.4127	161.448	254.842	80	3.98248	3.98912	130.618
4810	10	739.58	-2.05543	29.4121	161.447	255.237	80.1667	3.98239	3.98898	130.824
4820	10	739.449	-2.05506	29.4114	161.446	255.631	80.3333	3.9823	3.98884	131.029
4830	10	739.318	-2.05469	29.4107	161.445	256.026	80.5	3.98221	3.9887	131.235
4840	10	739.188	-2.05432	29.4101	161.444	256.419	80.6667	3.98212	3.98857	131.44
4850	10	739.058	-2.05395	29.4094	161.443	256.813	80.8333	3.98203	3.98843	131.645
4860	10	738.929	-2.05358	29.4088	161.442	257.206	81	3.98195	3.9883	131.85
4870	10	738.8	-2.05322	29.4081	161.441	257.599	81.1667	3.98186	3.98817	132.056
4880	10	738.671	-2.05285	29.4075	161.44	257.992	81.3333	3.98178	3.98804	132.261
4890	10	738.543	-2.05249	29.4069	161.439	258.384	81.5	3.98169	3.98791	132.466
4900	10	738.416	-2.05213	29.4063	161.437	258.776	81.6667	3.98161	3.98778	132.671
4910	10	738.288	-2.05177	29.4056	161.436	259.168	81.8333	3.98152	3.98765	132.876
4920	10	738.162	-2.05141	29.405	161.435	259.56	82	3.98144	3.98752	133.081
4930	10	738.035	-2.05105	29.4044	161.434	259.951	82.1667	3.98136	3.98739	133.286
4940	10	737.909	-2.05069	29.4038	161.432	260.342	82.3333	3.98128	3.98727	133.491
4950	10	737.784	-2.05034	29.4033	161.431	260.732	82.5	3.9812	3.98714	133.696
4960	10	737.659	-2.04999	29.4027	161.43	261.122	82.6667	3.98112	3.98702	133.901
4970	10	737.534	-2.04963	29.4021	161.428	261.512	82.8333	3.98104	3.9869	134.106
4980	10	737.41	-2.04928	29.4015	161.427	261.902	83	3.98096	3.98677	134.311
4990	10	737.286	-2.04893	29.4009	161.426	262.291	83.1667	3.98089	3.98665	134.516
5000	10	737.163	-2.04858	29.4004	161.424	262.68	83.3333	3.98081	3.98653	134.72
5010	10	737.04	-2.04823	29.3998	161.423	263.069	83.5	3.98074	3.98641	134.925
5020	10	736.917	-2.04789	29.3993	161.421	263.458	83.6667	3.98066	3.9863	135.13
5030	10	736.795	-2.04754	29.3987	161.42	263.846	83.8333	3.98059	3.98618	135.334
5040	10	736.673	-2.04719	29.3982	161.419	264.234	84	3.98051	3.98606	135.539
5050	10	736.552	-2.04685	29.3976	161.417	264.621	84.1667	3.98044	3.98595	135.744
5060	10	736.431	-2.04651	29.3971	161.416	265.008	84.3333	3.98037	3.98583	135.948
5070	10	736.31	-2.04617	29.3966	161.414	265.395	84.5	3.9803	3.98572	136.153
5080	10	736.19	-2.04583	29.3961	161.413	265.782	84.6667	3.98023	3.9856	136.357
5090	10	736.07	-2.04549	29.3956	161.411	266.168	84.8333	3.98016	3.98549	136.562
5100	10	735.951	-2.04515	29.3951	161.409	266.555	85	3.98009	3.98538	136.766
5110	10	735.832	-2.04481	29.3945	161.408	266.94	85.1667	3.98002	3.98527	136.971
5120	10	735.713	-2.04447	29.3941	161.406	267.326	85.3333	3.97995	3.98516	137.175
5130	10	735.595	-2.04414	29.3936	161.405	267.711	85.5	3.97989	3.98505	137.379
5140	10	735.477	-2.04381	29.3931	161.403	268.096	85.6667	3.97982	3.98494	137.584
5150	10	735.359	-2.04347	29.3926	161.401	268.481	85.8333	3.97976	3.98484	137.788
5160	10	735.242	-2.04314	29.3921	161.4	268.865	86	3.97969	3.98473	137.992
5170	10	735.125	-2.04281	29.3916	161.398	269.249	86.1667	3.97963	3.98463	138.196
5180	10	735.008	-2.04248	29.3912	161.397	269.633	86.3333	3.97956	3.98452	138.4
5190	10	734.892	-2.04215	29.3907	161.395	270.016	86.5	3.9795	3.98442	138.605
5200	10	734.776	-2.04182	29.3903	161.393	270.399	86.6667	3.97944	3.98432	138.809
5210	10	734.66	-2.0415	29.3898	161.392	270.782	86.8333	3.97938	3.98422	139.013
5220	10	734.545	-2.04117	29.3894	161.39	271.165	87	3.97932	3.98411	139.217
5230	10	734.43	-2.04084	29.3889	161.388	271.547	87.1667	3.97926	3.98401	139.421
5240	10	734.316	-2.04052	29.3885	161.386	271.929	87.3333	3.9792	3.98392	139.625
5250	10	734.201	-2.0402	29.388	161.385	272.31	87.5	3.97914	3.98382	139.829
5260	10	734.088	-2.03988	29.3876	161.383	272.692	87.6667	3.97908	3.98372	140.033
5270	10	733.974	-2.03955	29.3872	161.381	273.073	87.8333	3.97903	3.98362	140.236
5280	10	733.861	-2.03923	29.3868	161.38	273.454	88	3.97897	3.98353	140.44
5290	10	733.748	-2.03891	29.3864	161.378	273.834	88.1667	3.97891	3.98343	140.644
5300	10	733.635	-2.0386	29.386	161.376	274.214	88.3333	3.97886	3.98334	140.848
5310	10	733.523	-2.03828	29.3856	161.374	274.594	88.5	3.9788	3.98324	141.052
5320	10	733.411	-2.03796	29.3852	161.373	274.974	88.6667	3.97875	3.98315	141.255
5330	10	733.299	-2.03765	29.3848	161.371	275.353	88.8333	3.9787	3.98306	141.459
5340	10	733.188	-2.03733	29.3844	161.369	275.732	89	3.97864	3.98297	141.663
5350	10	733.077	-2.03702	29.384	161.367	276.111	89.1667	3.97859	3.98288	141.866
5360	10	732.966	-2.0367	29.3836	161.366	276.49	89.3333	3.97854	3.98279	142.07
5370	10	732.856	-2.03639	29.3832	161.364	276.868	89.5	3.97849	3.9827	142.274
5380	10	732.746	-2.03608	29.3829	161.362	277.246	89.6667	3.97844	3.98261	142.477
5390	10	732.636	-2.03577	29.3825	161.36	277.623	89.8333	3.97839	3.98253	142.681
5400	10	732.526	-2.03546	29.3821	161.358	278.001	90	3.97834	3.98244	142.884
5410	10	732.417	-2.03515	29.3818	161.357	278.378	90.1667	3.97829	3.98235	143.088
5420	10	732.308	-2.03484	29.3814	161.355	278.755	90.3333	3.97824	3.98227	143.291
5430	10	732.199	-2.03454	29.3811	161.353	279.131	90.5	3.9782	3.98219	143.494
5440	10	732.091	-2.03423	29.3807	161.351	279.507	90.6667	3.97815	3.9821	143.698
5450	10	731.983	-2.03393	29.3804	161.35	279.883	90.8333	3.9781	3.98202	143.901
5460	10	731.875	-2.03362	29.3801	161.348	280.259	91	3.97806	3.98194	144.104
5470	10	731.768	-2.03332	29.3797	161.346	280.634	91.1667	3.97801	3.98186	144.308
5480	10	731.66	-2.03301	29.3794	161.344	281.009	91.3333	3.97797	3.98178	144.511
5490	10	731.553	-2.03271	29.3791	161.342	281.384	91.5	3.97793	3.9817	144.714
5500	10	731.447	-2.03241	29.3788	161.341	281.759	91.6667	3.97788	3.98162	144.917
5510	10	731.34	-2.03211	29.3784	161.339	282.133	91.8333	3.97784	3.98154	145.12
5520	10	731.234	-2.03181	29.3781	161.337	282.507	92	3.9778	3.98146	145.324
5530	10	731.128	-2.03151	29.3778	161.335	282.88	92.1667	3.97776	3.98139	145.527
5540	10	731.022	-2.03121	29.3775	161.333	283.254	92.3333	3.97772	3.98131	145.73
5550	10	730.917	-2.03091	29.3772	161.332	283.627	92.5	3.97768	3.98124	145.933
5560	10	730.812	-2.03062	29.3769	161.33	284	92.6667	3.97764	3.98116	146.136
5570	10	730.707	-2.03032	29.3767	161.328	284.372	92.8333	3.9776	3.98109	146.339
5580	10	730.602	-2.03003	29.3764	161.326	284.744	93	3.97756	3.98102	146.542
5590	10	730.498	-2.02973	29.3761	161.325	285.116	93.1667	3.97752	3.98095	146.745
5600	10	730.394	-2.02944	29.3758	161.323	285.488	93.3333	3.97748	3.98087	146.947
5610	10	730.29	-2.02914	29.3755	161.321	285.859	93.5	3.97745	3.9808	147.15
5620	10	730.186	-2.02885	29.3753	161.319	286.23	93.6667	3.97741	3.98073	147.353
5630	10	730.083	-2.02856	29.375	161.317	286.601	93.8333	3.97738	3.98066	147.556
5640	10	729.98	-2.02827	29.3748	161.316	286.972	94	3.97734	3.9806	147.759
5650	10	729.877	-2.02798	29.3745	161.314	287.342	94.1667	3.97731	3.98053	147.961
5660	10	729.775	-2.02769	29.3742	161.312	287.712	94.3333	3.97727	3.98046	148.164
5670	10	729.672	-2.0274	29.374	161.31	288.082	94.5	3.97724	3.98039	148.367
5680	10	729.57	-2.02711	29.3738	161.309	288.451	94.6667	3.97721	3.98033	148.57
5690	10	729.468	-2.02682	29.3735	161.307	288.82	94.8333	3.97717	3.98026	148.772
5700	10	729.366	-2.02654	29.3733	161.305	289.189	95	3.97714	3.9802	148.975
5710	10	729.265	-2.02625	29.373	161.304	289.558	95.1667	3.97711	3.98013	149.177
5720	10	729.164	-2.02596	29.3728	161.302	289.926	95.3333	3.97708	3.98007	149.38
5730	10	729.063	-2.02568	29.3726	161.3	290.294	95.5	3.97705	3.98001	149.582
5740	10	728.962	-2.0254	29.3724	161.298	290.662	95.6667	3.97702	3.97995	149.785
5750	10	728.861	-2.02511	29.3721	161.297	291.029	95.8333	3.97699	3.97989	149.987
5760	10	728.761	-2.02483	29.3719	161.295	291.397	96	3.97696	3.97983	150.19
5770	10	728.661	-2.02455	29.3717	161.293	291.764	96.1667	3.97693	3.97977	150.392
5780	10	728.561	-2.02427	29.3715	161.292	292.13	96.3333	3.9769	3.97971	150.595
5790	10	728.461	-2.02398	29.3713	161.29	292.497	96.5	3.97688	3.97965	150.797
5800	10	728.362	-2.0237	29.3711	161.288	292.863	96.6667	3.97685	3.97959	150.999
5810	10	728.263	-2.02342	29.3709	161.286	293.229	96.8333	3.97682	3.97953	151.202
5820	10	728.164	-2.02314	29.3707	161.285	293.594	97	3.9768	3.97948	151.404
5830	10	728.065	-2.02287	29.3705	161.283	293.96	97.1667	3.97677	3.97942	151.606
5840	10	727.966	-2.02259	29.3704	161.281	294.325	97.3333	3.97674	3.97937	151.808
5850	10	727.868	-2.02231	29.3702	161.28	294.689	97.5	3.97672	3.97931	152.01
5860	10	727.77	-2.02203	29.37	161.278	295.054	97.6667	3.9767	3.97926	152.213
5870	10	727.672	-2.02176	29.3698	161.277	295.418	97.8333	3.97667	3.9792	152.415
5880	10	727.574	-2.02148	29.3696	161.275	295.782	98	3.97665	3.97915	152.617
5890	10	727.477	-2.02121	29.3695	161.273	296.145	98.1667	3.97663	3.9791	152.819
5900	10	727.379	-2.02093	29.3693	161.272	296.509	98.3333	3.9766	3.97905	153.021
5910	10	727.282	-2.02066	29.3692	161.27	296.872	98.5	3.97658	3.979	153.223
5920	10	727.185	-2.02039	29.369	161.268	297.235	98.6667	3.97656	3.97895	153.425
5930	10	727.088	-2.02011	29.3688	161.267	297.597	98.8333	3.97654	3.9789	153.627
5940	10	726.992	-2.01984	29.3687	161.265	297.96	99	3.97652	3.97885	153.829
5950	10	726.895	-2.01957	29.3685	161.264	298.322	99.1667	3.9765	3.9788	154.031
5960	10	726.799	-2.0193	29.3684	161.262	298.683	99.3333	3.97648	3.97875	154.233
5970	10	726.703	-2.01903	29.3683	161.261	299.045	99.5	3.97646	3.9787	154.435
5980	10	726.608	-2.01876	29.3681	161.259	299.406	99.6667	3.97644	3.97866	154.636
5990	10	726.512	-2.01849	29.368	161.258	299.767	99.8333	3.97642	3.97861	154.838
6000	10	726.416	-2.01822	29.3679	161.256	300.128	100	3.97641	3.97857	155.04
6010	10	726.321	-2.01795	29.3677	161.254	300.488	100.167	3.97639	3.97852	155.242
6020	10	726.226	-2.01768	29.3676	161.253	300.848	100.333	3.97637	3.97848	155.443
6030	10	726.131	-2.01742	29.3675	161.251	301.208	100.5	3.97636	3.97843	155.645
6040	10	726.037	-2.01715	29.3674	161.25	301.568	100.667	3.97634	3.97839	155.847
6050	10	725.942	-2.01688	29.3672	161.248	301.927	100.833	3.97632	3.97835	156.048
6060	10	725.848	-2.01662	29.3671	161.247	302.286	101	3.97631	3.9783	156.25
6070	10	725.754	-2.01635	29.367	161.245	302.645	101.167	3.97629	3.97826	156.452
6080	10	725.66	-2.01609	29.3669	161.244	303.003	101.333	3.97628	3.97822	156.653
6090	10	725.566	-2.01582	29.3668	161.243	303.362	101.5	3.97627	3.97818	156.855
6100	10	725.472	-2.01556	29.3667	161.241	303.72	101.667	3.97625	3.97814	157.056
6110	10	725.379	-2.0153	29.3666	161.24	304.077	101.833	3.97624	3.9781	157.258
6120	10	725.286	-2.01504	29.3665	161.238	304.435	102	3.97623	3.97806	157.459
6130	10	725.193	-2.01477	29.3664	161.237	304.792	102.167	3.97621	3.97802	157.661
6140	10	725.1	-2.01451	29.3663	161.235	305.149	102.333	3.9762	3.97799	157.862
6150	10	725.007	-2.01425	29.3663	161.234	305.506	102.5	3.97619	3.97795	158.064
6160	10	724.914	-2.01399	29.3662	161.233	305.862	102.667	3.97618	3.97791	158.265
6170	10	724.822	-2.01373	29.3661	161.231	306.218	102.833	3.97617	3.97788	158.466
6180	10	724.73	-2.01347	29.366	161.23	306.574	103	3.97616	3.97784	158.668
6190	10	724.637	-2.01321	29.3659	161.229	306.929	103.167	3.97615	3.97781	158.869
6200	10	724.546	-2.01295	29.3659	161.227	307.285	103.333	3.97614	3.97777	159.07
6210	10	724.454	-2.01269	29.3658	161.226	307.64	103.5	3.97613	3.97774	159.271
6220	10	724.362	-2.01244	29.3657	161.225	307.995	103.667	3.97612	3.9777	159.473
6230	10	724.271	-2.01218	29.3657	161.223	308.349	103.833	3.97611	3.97767	159.674
6240	10	724.179	-2.01192	29.3656	161.222	308.703	104	3.9761	3.97764	159.875
6250	10	724.088	-2.01167	29.3656	161.221	309.057	104.167	3.9761	3.97761	160.076
6260	10	723.997	-2.01141	29.3655	161.219	309.411	104.333	3.97609	3.97757	160.277
6270	10	723.906	-2.01116	29.3655	161.218	309.765	104.5	3.97608	3.97754	160.478
6280	10	723.816	-2.0109	29.3654	161.217	310.118	104.667	3.97608	3.97751	160.679
6290	10	723.725	-2.01065	29.3654	161.216	310.471	104.833	3.97607	3.97748	160.88
6300	10	723.635	-2.01039	29.3653	161.214	310.824	105	3.97606	3.97745	161.081
6310	10	723.545	-2.01014	29.3653	161.213	311.176	105.167	3.97606	3.97743	161.282
6320	10	723.455	-2.00988	29.3652	161.212	311.528	105.333	3.97605	3.9774	161.483
6330	10	723.365	-2.00963	29.3652	161.211	311.88	105.5	3.97605	3.97737	161.684
6340	10	723.275	-2.00938	29.3652	161.209	312.232	105.667	3.97604	3.97734	161.885
6350	10	723.185	-2.00913	29.3651	161.208	312.583	105.833	3.97604	3.97731	162.086
6360	10	723.096	-2.00888	29.3651	161.207	312.934	106	3.97603	3.97729	162.287
6370	10	723.007	-2.00863	29.3651	161.206	313.285	106.167	3.97603	3.97726	162.488
6380	10	722.917	-2.00837	29.3651	161.205	313.636	106.333	3.97603	3.97724	162.689
6390	10	722.828	-2.00812	29.365	161.204	313.986	106.5	3.97603	3.97721	162.889
6400	10	722.739	-2.00787	29.365	161.202	314.336	106.667	3.97602	3.97719	163.09
6410	10	722.651	-2.00762	29.365	161.201	314.686	106.833	3.97602	3.97716	163.291
6420	10	722.562	-2.00738	29.365	161.2	315.036	107	3.97602	3.97714	163.492
6430	10	722.474	-2.00713	29.365	161.199	315.385	107.167	3.97602	3.97711	163.692
6440	10	722.385	-2.00688	29.365	161.198	315.734	107.333	3.97602	3.97709	163.893
6450	10	722.297	-2.00663	29.365	161.197	316.083	107.5	3.97602	3.97707	164.094
6460	10	722.209	-2.00638	29.365	161.196	316.431	107.667	3.97602	3.97705	164.294
6470	10	722.121	-2.00614	29.365	161.195	316.78	107.833	3.97602	3.97703	164.495
6480	10	722.033	-2.00589	29.365	161.194	317.128	108	3.97602	3.977	164.695
6490	10	721.946	-2.00564	29.365	161.193	317.475	108.167	3.97602	3.97698	164.896
6500	10	721.858	-2.0054	29.365	161.192	317.823	108.333	3.97602	3.97696	165.096
6510	10	721.771	-2.00515	29.365	161.191	318.17	108.5	3.97602	3.97694	165.297
6520	10	721.683	-2.00491	29.365	161.19	318.517	108.667	3.97602	3.97692	165.497
6530	10	721.596	-2.00466	29.365	161.189	318.864	108.833	3.97602	3.97691	165.698
6540	10	721.509	-2.00442	29.365	161.188	319.21	109	3.97602	3.97689	165.898
6550	10	721.422	-2.00417	29.365	161.187	319.556	109.167	3.97603	3.97687	166.099
6560	10	721.336	-2.00393	29.3651	161.186	319.902	109.333	3.97603	3.97685	166.299
6570	10	721.249	-2.00369	29.3651	161.185	320.248	109.5	3.97603	3.97683	166.499
6580	10	721.163	-2.00345	29.3651	161.184	320.594	109.667	3.97604	3.97682	166.7
6590	10	721.076	-2.0032	29.3651	161.183	320.939	109.833	3.97604	3.9768	166.9
6600	10	720.99	-2.00296	29.3652	161.182	321.284	110	3.97604	3.97679	167.1
6610	10	720.904	-2.00272	29.3652	161.181	321.628	110.167	3.97605	3.97677	167.3
6620	10	720.818	-2.00248	29.3652	161.18	321.973	110.333	3.97605	3.97676	167.501
6630	10	720.732	-2.00224	29.3653	161.179	322.317	110.5	3.97606	3.97674	167.701
6640	10	720.646	-2.002	29.3653	161.179	322.661	110.667	3.97606	3.97673	167.901
6650	10	720.561	-2.00176	29.3653	161.178	323.005	110.833	3.97607	3.97671	168.101
6660	10	720.475	-2.00152	29.3654	161.177	323.348	111	3.97607	3.9767	168.301
6670	10	720.39	-2.00128	29.3654	161.176	323.691	111.167	3.97608	3.97669	168.501
6680	10	720.305	-2.00104	29.3655	161.175	324.034	111.333	3.97608	3.97667	168.702
6690	10	720.219	-2.0008	29.3655	161.174	324.377	111.5	3.97609	3.97666	168.902
6700	10	720.134	-2.00056	29.3656	161.174	324.719	111.667	3.9761	3.97665	169.102
6710	10	720.049	-2.00032	29.3656	161.173	325.061	111.833	3.9761	3.97664	169.302
6720	10	719.965	-2.00008	29.3657	161.172	325.403	112	3.97611	3.97663	169.502
6730	10	719.88	-1.99985	29.3657	161.171	325.745	112.167	3.97612	3.97662	169.702
6740	10	719.795	-1.99961	29.3658	161.17	326.086	112.333	3.97613	3.97661	169.902
6750	10	719.711	-1.99937	29.3658	161.17	326.427	112.5	3.97614	3.9766	170.101
6760	10	719.627	-1.99914	29.3659	161.169	326.768	112.667	3.97614	3.97659	170.301
6770	10	719.542	-1.9989	29.366	161.168	327.109	112.833	3.97615	3.97658	170.501
6780	10	719.458	-1.99866	29.366	161.168	327.449	113	3.97616	3.97657	170.701
6790	10	719.374	-1.99843	29.3661	161.167	327.789	113.167	3.97617	3.97656	170.901
6800	10	719.29	-1.99819	29.3662	161.166	328.129	113.333	3.97618	3.97655	171.101
6810	10	719.207	-1.99796	29.3662	161.166	328.469	113.5	3.97619	3.97654	171.3
6820	10	719.123	-1.99772	29.3663	161.165	328.808	113.667	3.9762	3.97654	171.5
6830	10	719.039	-1.99749	29.3664	161.164	329.148	113.833	3.97621	3.97653	171.7
6840	10	718.956	-1.99725	29.3665	161.164	329.486	114	3.97622	3.97652	171.9
6850	10	718.873	-1.99702	29.3666	161.163	329.825	114.167	3.97623	3.97652	172.099
6860	10	718.789	-1.99679	29.3666	161.162	330.163	114.333	3.97624	3.97651	172.299
6870	10	718.706	-1.99655	29.3667	161.162	330.502	114.5	3.97625	3.9765	172.499
6880	10	718.623	-1.99632	29.3668	161.161	330.84	114.667	3.97626	3.9765	172.698
6890	10	718.54	-1.99609	29.3669	161.161	331.177	114.833	3.97628	3.97649	172.898
6900	10	718.457	-1.99586	29.367	161.16	331.515	115	3.97629	3.97649	173.097
6910	10	718.375	-1.99563	29.3671	161.159	331.852	115.167	3.9763	3.97649	173.297
6920	10	718.292	-1.99539	29.3672	161.159	332.189	115.333	3.97631	3.97648	173.497
6930	10	718.21	-1.99516	29.3672	161.158	332.525	115.5	3.97632	3.97648	173.696
6940	10	718.127	-1.99493	29.3673	161.158	332.862	115.667	3.97634	3.97647	173.896
6950	10	718.045	-1.9947	29.3674	161.157	333.198	115.833	3.97635	3.97647	174.095
6960	10	717.963	-1.99447	29.3675	161.157	333.534	116	3.97636	3.97647	174.294
6970	10	717.881	-1.99424	29.3676	161.156	333.869	116.167	3.97638	3.97647	174.494
6980	10	717.799	-1.99401	29.3677	161.156	334.205	116.333	3.97639	3.97647	174.693
6990	10	717.717	-1.99378	29.3678	161.155	334.54	116.5	3.9764	3.97646	174.893
7000	10	717.635	-1.99355	29.3679	161.155	334.875	116.667	3.97642	3.97646	175.092
7010	10	717.553	-1.99332	29.368	161.154	335.21	116.833	3.97643	3.97646	175.291
7020	10	717.472	-1.9931	29.3682	161.154	335.544	117	3.97645	3.97646	175.491
7030	10	717.39	-1.99287	29.3683	161.153	335.878	117.167	3.97646	3.97646	175.69
7040	10	717.309	-1.99264	29.3684	161.153	336.212	117.333	3.97648	3.97646	175.889
7050	10	717.227	-1.99241	29.3685	161.153	336.546	117.5	3.97649	3.97646	176.088
7060	10	717.146	-1.99218	29.3686	161.152	336.879	117.667	3.97651	3.97646	176.287
7070	10	717.065	-1.99196	29.3687	161.152	337.213	117.833	3.97652	3.97646	176.487
7080	10	716.984	-1.99173	29.3688	161.151	337.546	118	3.97654	3.97646	176.686
7090	10	716.903	-1.9915	29.369	161.151	337.878	118.167	3.97656	3.97647	176.885
7100	10	716.822	-1.99128	29.3691	161.151	338.211	118.333	3.97657	3.97647	177.084
7110	10	716.741	-1.99105	29.3692	161.15	338.543	118.5	3.97659	3.97647	177.283
7120	10	716.661	-1.99083	29.3693	161.15	338.875	118.667	3.97661	3.97647	177.482
7130	10	716.58	-1.9906	29.3694	161.15	339.207	118.833	3.97662	3.97647	177.681
7140	10	716.5	-1.99037	29.3696	161.149	339.538	119	3.97664	3.97648	177.88
7150	10	716.419	-1.99015	29.3697	161.149	339.87	119.167	3.97666	3.97648	178.079
7160	10	716.339	-1.98992	29.3698	161.149	340.201	119.333	3.97667	3.97649	178.278
7170	10	716.259	-1.9897	29.37	161.149	340.531	119.5	3.97669	3.97649	178.477
7180	10	716.179	-1.98948	29.3701	161.148	340.862	119.667	3.97671	3.97649	178.676
7190	10	716.099	-1.98925	29.3702	161.148	341.192	119.833	3.97673	3.9765	178.875
7200	10	716.019	-1.98903	29.3704	161.148	341.522	120	3.97675	3.9765	179.074
7210	10	715.939	-1.9888	29.3705	161.148	341.852	120.167	3.97676	3.97651	179.273
7220	10	715.859	-1.98858	29.3706	161.147	342.182	120.333	3.97678	3.97651	179.472
7230	10	715.779	-1.98836	29.3708	161.147	342.511	120.5	3.9768	3.97652	179.671
7240	10	715.7	-1.98814	29.3709	161.147	342.84	120.667	3.97682	3.97652	179.869
7250	10	715.62	-1.98791	29.3711	161.147	343.169	120.833	3.97684	3.97653	180.068
7260	10	715.541	-1.98769	29.3712	161.147	343.497	121	3.97686	3.97654	180.267
7270	10	715.462	-1.98747	29.3713	161.146	343.826	121.167	3.97688	3.97654	180.466
7280	10	715.382	-1.98725	29.3715	161.146	344.154	121.333	3.9769	3.97655	180.664
7290	10	715.303	-1.98703	29.3716	161.146	344.482	121.5	3.97692	3.97656	180.863
7300	10	715.224	-1.98681	29.3718	161.146	344.81	121.667	3.97694	3.97657	181.062
7310	10	715.145	-1.98658	29.3719	161.146	345.137	121.833	3.97696	3.97657	181.26
7320	10	715.066	-1.98636	29.3721	161.146	345.464	122	3.97698	3.97658	181.459
7330	10	714.987	-1.98614	29.3722	161.146	345.791	122.167	3.977	3.97659	181.658
7340	10	714.909	-1.98592	29.3724	161.145	346.118	122.333	3.97702	3.9766	181.856
7350	10	714.83	-1.9857	29.3725	161.145	346.444	122.5	3.97704	3.97661	182.055
7360	10	714.751	-1.98548	29.3727	161.145	346.77	122.667	3.97706	3.97662	182.253
7370	10	714.673	-1.98526	29.3729	161.145	347.096	122.833	3.97708	3.97663	182.452
7380	10	714.595	-1.98504	29.373	161.145	347.422	123	3.97711	3.97664	182.65
7390	10	714.516	-1.98483	29.3732	161.145	347.748	123.167	3.97713	3.97664	182.849
7400	10	714.438	-1.98461	29.3733	161.145	348.073	123.333	3.97715	3.97665	183.047
7410	10	714.36	-1.98439	29.3735	161.145	348.398	123.5	3.97717	3.97667	183.246
7420	10	714.282	-1.98417	29.3737	161.145	348.723	123.667	3.97719	3.97668	183.444
7430	10	714.204	-1.98395	29.3738	161.145	349.047	123.833	3.97722	3.97669	183.643
7440	10	714.126	-1.98373	29.374	161.145	349.372	124	3.97724	3.9767	183.841
7450	10	714.048	-1.98352	29.3742	161.145	349.696	124.167	3.97726	3.97671	184.039
7460	10	713.97	-1.9833	29.3743	161.145	350.019	124.333	3.97728	3.97672	184.238
7470	10	713.892	-1.98308	29.3745	161.145	350.343	124.5	3.97731	3.97673	184.436
7480	10	713.815	-1.98286	29.3747	161.145	350.666	124.667	3.97733	3.97674	184.634
7490	10	713.737	-1.98265	29.3748	161.145	350.99	124.833	3.97735	3.97676	184.832
7500	10	713.66	-1.98243	29.375	161.145	351.312	125	3.97738	3.97677	185.031
7510	10	713.582	-1.98221	29.3752	161.145	351.635	125.167	3.9774	3.97678	185.229
7520	10	713.505	-1.982	29.3754	161.145	351.958	125.333	3.97742	3.97679	185.427
7530	10	713.428	-1.98178	29.3755	161.145	352.28	125.5	3.97745	3.97681	185.625
7540	10	713.351	-1.98157	29.3757	161.145	352.602	125.667	3.97747	3.97682	185.823
7550	10	713.274	-1.98135	29.3759	161.145	352.923	125.833	3.97749	3.97683	186.022
7560	10	713.197	-1.98114	29.3761	161.146	353.245	126	3.97752	3.97685	186.22
7570	10	713.12	-1.98092	29.3762	161.146	353.566	126.167	3.97754	3.97686	186.418
7580	10	713.043	-1.98071	29.3764	161.146	353.887	126.333	3.97757	3.97688	186.616
7590	10	712.966	-1.98049	29.3766	161.146	354.208	126.5	3.97759	3.97689	186.814
7600	10	712.889	-1.98028	29.3768	161.146	354.528	126.667	3.97762	3.97691	187.012
7610	10	712.813	-1.98006	29.377	161.146	354.849	126.833	3.97764	3.97692	187.21
7620	10	712.736	-1.97985	29.3772	161.146	355.169	127	3.97767	3.97694	187.408
7630	10	712.659	-1.97964	29.3773	161.147	355.489	127.167	3.97769	3.97695	187.606
7640	10	712.583	-1.97942	29.3775	161.147	355.808	127.333	3.97772	3.97697	187.804
7650	10	712.507	-1.97921	29.3777	161.147	356.128	127.5	3.97774	3.97698	188.002
7660	10	712.43	-1.979	29.3779	161.147	356.447	127.667	3.97777	3.977	188.2
7670	10	712.354	-1.97878	29.3781	161.147	356.766	127.833	3.97779	3.97701	188.397
7680	10	712.278	-1.97857	29.3783	161.148	357.084	128	3.97782	3.97703	188.595
7690	10	712.202	-1.97836	29.3785	161.148	357.403	128.167	3.97785	3.97705	188.793
7700	10	712.126	-1.97815	29.3787	161.148	357.721	128.333	3.97787	3.97706	188.991
7710	10	712.05	-1.97793	29.3789	161.148	358.039	128.5	3.9779	3.97708	189.189
7720	10	711.974	-1.97772	29.3791	161.148	358.357	128.667	3.97792	3.9771	189.387
7730	10	711.898	-1.97751	29.3793	161.149	358.674	128.833	3.97795	3.97711	189.584
7740	10	711.823	-1.9773	29.3795	161.149	358.992	129	3.97798	3.97713	189.782
7750	10	711.747	-1.97709	29.3796	161.149	359.309	129.167	3.978	3.97715	189.98
7760	10	711.671	-1.97688	29.3798	161.15	359.626	129.333	3.97803	3.97717	190.177
7770	10	711.596	-1.97667	29.38	161.15	359.942	129.5	3.97806	3.97718	190.375
7780	10	711.52	-1.97646	29.3802	161.15	360.259	129.667	3.97808	3.9772	190.573
7790	10	711.445	-1.97625	29.3804	161.15	360.575	129.833	3.97811	3.97722	190.77
7800	10	711.37	-1.97603	29.3806	161.151	360.891	130	3.97814	3.97724	190.968
7810	10	711.294	-1.97582	29.3808	161.151	361.206	130.167	3.97817	3.97726	191.165
7820	10	711.219	-1.97561	29.3811	161.151	361.522	130.333	3.97819	3.97728	191.363
7830	10	711.144	-1.97541	29.3813	161.152	361.837	130.5	3.97822	3.9773	191.561
7840	10	711.069	-1.9752	29.3815	161.152	362.152	130.667	3.97825	3.97732	191.758
7850	10	710.994	-1.97499	29.3817	161.152	362.467	130.833	3.97828	3.97734	191.956
7860	10	710.919	-1.97478	29.3819	161.153	362.781	131	3.9783	3.97736	192.153
7870	10	710.844	-1.97457	29.3821	161.153	363.096	131.167	3.97833	3.97737	192.351
7880	10	710.769	-1.97436	29.3823	161.154	363.41	131.333	3.97836	3.97739	192.548
7890	10	710.695	-1.97415	29.3825	161.154	363.724	131.5	3.97839	3.97741	192.745
7900	10	710.62	-1.97394	29.3827	161.154	364.037	131.667	3.97842	3.97744	192.943
7910	10	710.545	-1.97373	29.3829	161.155	364.351	131.833	3.97845	3.97746	193.14
7920	10	710.471	-1.97353	29.3831	161.155	364.664	132	3.97847	3.97748	193.338
7930	10	710.396	-1.97332	29.3833	161.156	364.977	132.167	3.9785	3.9775	193.535
7940	10	710.322	-1.97311	29.3835	161.156	365.289	132.333	3.97853	3.97752	193.732
7950	10	710.248	-1.9729	29.3838	161.157	365.602	132.5	3.97856	3.97754	193.929
7960	10	710.173	-1.9727	29.384	161.157	365.914	132.667	3.97859	3.97756	194.127
7970	10	710.099	-1.97249	29.3842	161.157	366.226	132.833	3.97862	3.97758	194.324
7980	10	710.025	-1.97228	29.3844	161.158	366.538	133	3.97865	3.9776	194.521
7990	10	709.951	-1.97208	29.3846	161.158	366.85	133.167	3.97868	3.97763	194.718
8000	10	709.877	-1.97187	29.3848	161.159	367.161	133.333	3.97871	3.97765	194.916
8010	10	709.803	-1.97166	29.385	161.159	367.472	133.5	3.97873	3.97767	195.113
8020	10	709.729	-1.97146	29.3853	161.16	367.783	133.667	3.97876	3.97769	195.31
8030	10	709.655	-1.97125	29.3855	161.16	368.094	133.833	3.97879	3.97771	195.507
8040	10	709.581	-1.97105	29.3857	161.161	368.404	134	3.97882	3.97774	195.704
8050	10	709.507	-1.97084	29.3859	161.161	368.714	134.167	3.97885	3.97776	195.901
8060	10	709.434	-1.97063	29.3861	161.162	369.024	134.333	3.97888	3.97778	196.098
8070	10	709.36	-1.97043	29.3864	161.162	369.334	134.5	3.97891	3.9778	196.295
8080	10	709.287	-1.97022	29.3866	161.163	369.644	134.667	3.97894	3.97783	196.492
8090	10	709.213	-1.97002	29.3868	161.163	369.953	134.833	3.97897	3.97785	196.689
8100	10	709.14	-1.96981	29.387	161.164	370.262	135	3.979	3.97787	196.886
8110	10	709.066	-1.96961	29.3873	161.165	370.571	135.167	3.97903	3.9779	197.083
8120	10	708.993	-1.9694	29.3875	161.165	370.88	135.333	3.97906	3.97792	197.28
8130	10	708.92	-1.9692	29.3877	161.166	371.188	135.5	3.97909	3.97795	197.477
8140	10	708.847	-1.969	29.3879	161.166	371.496	135.667	3.97912	3.97797	197.674
8150	10	708.773	-1.96879	29.3881	161.167	371.804	135.833	3.97915	3.97799	197.871
8160	10	708.7	-1.96859	29.3884	161.167	372.112	136	3.97919	3.97802	198.068
8170	10	708.627	-1.96839	29.3886	161.168	372.419	136.167	3.97922	3.97804	198.265
8180	10	708.554	-1.96818	29.3888	161.169	372.727	136.333	3.97925	3.97807	198.461
8190	10	708.482	-1.96798	29.3891	161.169	373.034	136.5	3.97928	3.97809	198.658
8200	10	708.409	-1.96778	29.3893	161.17	373.341	136.667	3.97931	3.97812	198.855
8210	10	708.336	-1.96757	29.3895	161.17	373.647	136.833	3.97934	3.97814	199.052
8220	10	708.263	-1.96737	29.3897	161.171	373.954	137	3.97937	3.97817	199.249
8230	10	708.19	-1.96717	29.39	161.172	374.26	137.167	3.9794	3.97819	199.445
8240	10	708.118	-1.96697	29.3902	161.172	374.566	137.333	3.97943	3.97822	199.642
8250	10	708.045	-1.96676	29.3904	161.173	374.872	137.5	3.97946	3.97824	199.839
8260	10	707.973	-1.96656	29.3907	161.174	375.177	137.667	3.9795	3.97827	200.035
8270	10	707.9	-1.96636	29.3909	161.174	375.483	137.833	3.97953	3.97829	200.232
8280	10	707.828	-1.96616	29.3911	161.175	375.788	138	3.97956	3.97832	200.429
8290	10	707.756	-1.96596	29.3914	161.176	376.092	138.167	3.97959	3.97834	200.625
8300	10	707.683	-1.96575	29.3916	161.176	376.397	138.333	3.97962	3.97837	200.822
8310	10	707.611	-1.96555	29.3918	161.177	376.702	138.5	3.97965	3.9784	201.018
8320	10	707.539	-1.96535	29.3921	161.178	377.006	138.667	3.97968	3.97842	201.215
8330	10	707.467	-1.96515	29.3923	161.178	377.31	138.833	3.97972	3.97845	201.411
8340	10	707.395	-1.96495	29.3925	161.179	377.613	139	3.97975	3.97848	201.608
8350	10	707.323	-1.96475	29.3928	161.18	377.917	139.167	3.97978	3.9785	201.804
8360	10	707.251	-1.96455	29.393	161.181	378.22	139.333	3.97981	3.97853	202.001
8370	10	707.179	-1.96435	29.3932	161.181	378.523	139.5	3.97984	3.97855	202.197
8380	10	707.107	-1.96415	29.3935	161.182	378.826	139.667	3.97988	3.97858	202.394
8390	10	707.035	-1.96395	29.3937	161.183	379.129	139.833	3.97991	3.97861	202.59
8400	10	706.964	-1.96375	29.394	161.184	379.431	140	3.97994	3.97864	202.786
8410	10	706.892	-1.96355	29.3942	161.184	379.734	140.167	3.97997	3.97866	202.983
8420	10	706.82	-1.96335	29.3944	161.185	380.036	140.333	3.98001	3.97869	203.179
8430	10	706.749	-1.96315	29.3947	161.186	380.337	140.5	3.98004	3.97872	203.375
8440	10	706.677	-1.96295	29.3949	161.187	380.639	140.667	3.98007	3.97875	203.572
8450	10	706.606	-1.96275	29.3952	161.187	380.94	140.833	3.9801	3.97877	203.768
8460	10	706.535	-1.96255	29.3954	161.188	381.242	141	3.98014	3.9788	203.964
8470	10	706.463	-1.96236	29.3956	161.189	381.542	141.167	3.98017	3.97883	204.161
8480	10	706.392	-1.96216	29.3959	161.19	381.843	141.333	3.9802	3.97886	204.357
8490	10	706.321	-1.96196	29.3961	161.191	382.144	141.5	3.98023	3.97888	204.553
8500	10	706.249	-1.96176	29.3964	161.191	382.444	141.667	3.98027	3.97891	204.749
8510	10	706.178	-1.96156	29.3966	161.192	382.744	141.833	3.9803	3.97894	204.945
8520	10	706.107	-1.96136	29.3968	161.193	383.044	142	3.98033	3.97897	205.141
8530	10	706.036	-1.96117	29.3971	161.194	383.343	142.167	3.98036	3.979	205.338
8540	10	705.965	-1.96097	29.3973	161.195	383.643	142.333	3.9804	3.97903	205.534
8550	10	705.894	-1.96077	29.3976	161.195	383.942	142.5	3.98043	3.97905	205.73
8560	10	705.823	-1.96057	29.3978	161.196	384.241	142.667	3.98046	3.97908	205.926
8570	10	705.753	-1.96038	29.3981	161.197	384.54	142.833	3.9805	3.97911	206.122
8580	10	705.682	-1.96018	29.3983	161.198	384.838	143	3.98053	3.97914	206.318
8590	10	705.611	-1.95998	29.3985	161.199	385.136	143.167	3.98056	3.97917	206.514
8600	10	705.54	-1.95979	29.3988	161.2	385.435	143.333	3.9806	3.9792	206.71
8610	10	705.47	-1.95959	29.399	161.2	385.732	143.5	3.98063	3.97923	206.906
[truncated: 219 more rows]

## Sheet: Peaking Fn
100 seconds max infusion rate, peak effect in data
[truncated: 602 more rows]

## Sheet: data
Table 1
[truncated: 26 more rows]
