# Supplementary material for: General purpose propofol target-controlled infusion using the Marsh model with adjusted weight input
Source: Research Square preprint supplement (doi:10.21203/rs.3.rs-3296215/v3), 2024-01-19
Supplement: Supplementary file 1 [file e31f0ed13063c874c8a7daf8.docx]

**Technical details and schematic of the EleMarsh algorithm for adjusting the Marsh input weight**


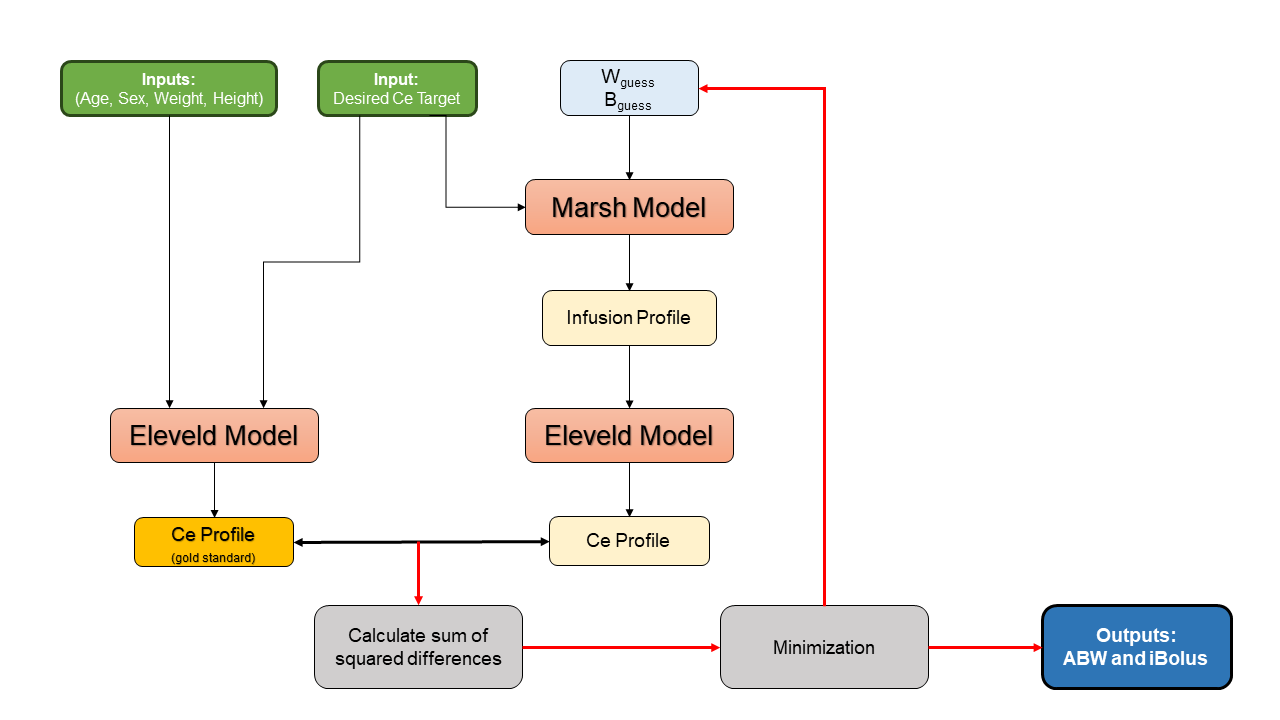


1. Use patient covariates (age, weight, height, and sex) and the desired effect site concentration (Ce) target as inputs for the Eleveld model to generate an Ce versus time profile.
2. Set up an optimization problem with two decision variables, Wguess and Bguess. Use Wguess as the weight input, Bguess as the size of the induction bolus and the Ce target from step one as the maintenance plasma target for the Marsh model to construct an infusion rate versus time regime.
3. Use the same patient covariates from step one and the Marsh infusion regime obtained in step two as inputs for a separate Eleveld model to generate a second Ce versus time profile.
4. Calculate the squared difference in Ce between the infusion profiles obtained in steps one and three at each time step.
5. Iterate steps two to four to determine the combination of Wguess and Bguess that minimizes the sum of squared differences calculated in step four (the optimisation variable).
6. The best combination of Wguess and Bguess from step 5 represents the optimized input weight and induction bolus, respectively, which when used with the plasma targeting Marsh model will produce an infusion regime that will closely mimic the behavior of the effect site targeting Eleveld model.
